# Supplementary material for: Molecular and Photosynthetic Performance in the Yellow Leaf Mutant of Torreya grandis According to Transcriptome Sequencing, Chlorophyll a Fluorescence, and Modulated 820 nm Reflection
Source: MDPI journal article supplement (doi:10.3390/cells11030431), 2022-01-27
Supplement: s1 [file s1]

## *Supplementary Material*

### Supplementary Figures and Tables

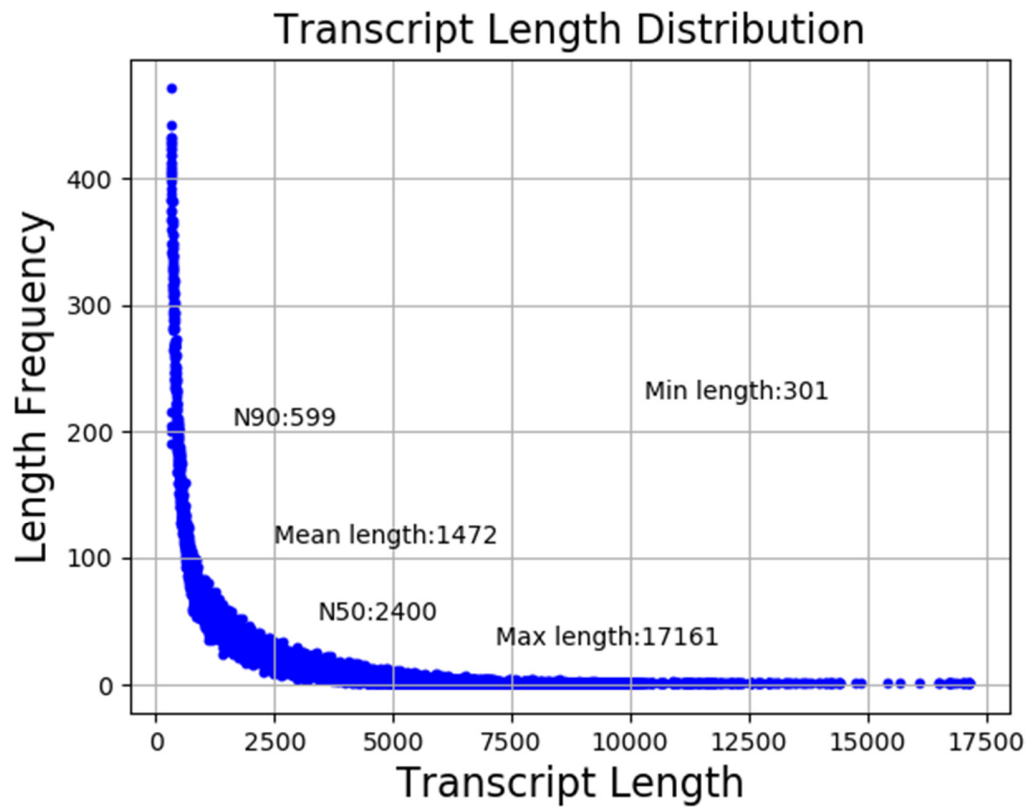

**Figure S1** Assembly results in the leaves of mutant type and wild type of *Torreya grandis*.

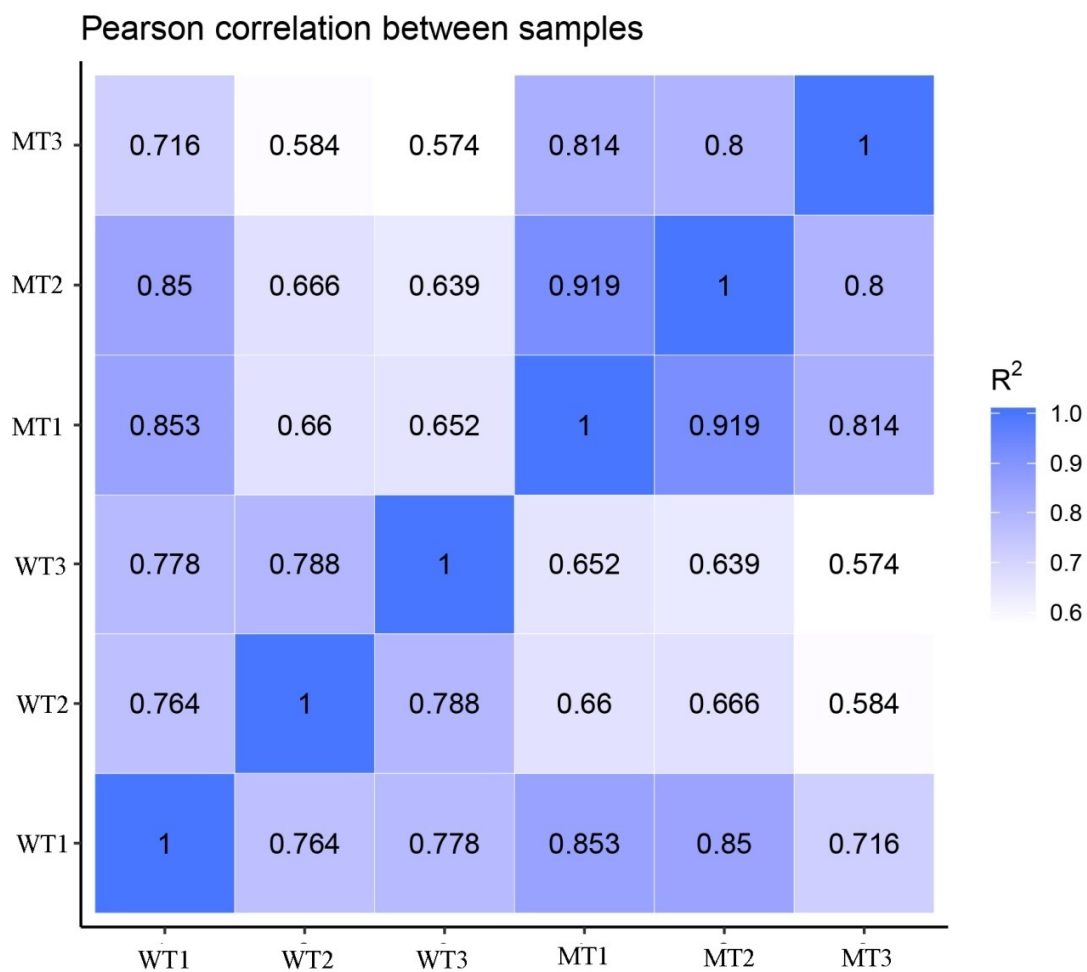

**Figure S2** Pearson’s correlation coefficients between two biological replicates in the six samples.  
(WT1, WT2, and WT3 are the three biological repeats of the wild type of *Torreya grandis*; MT1, MT2, and MT3 are the three biological repeats of the mutant type of *T.grandis*)

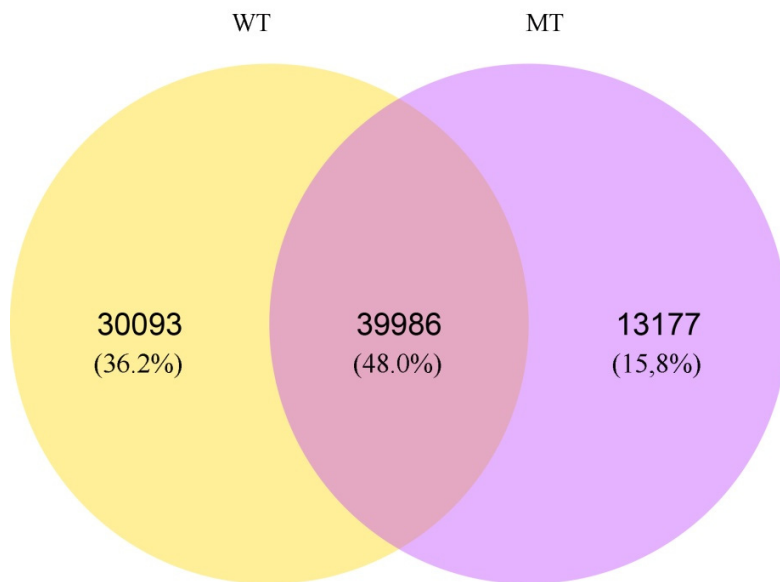

**Figure S3** Venn diagram of the number of DEGs ( $P_{adj} < 0.05$ ) in the leaves of mutant type and wild type of *Torreya grandis*. (WT means wild type; MT means yellow leaf mutant type)

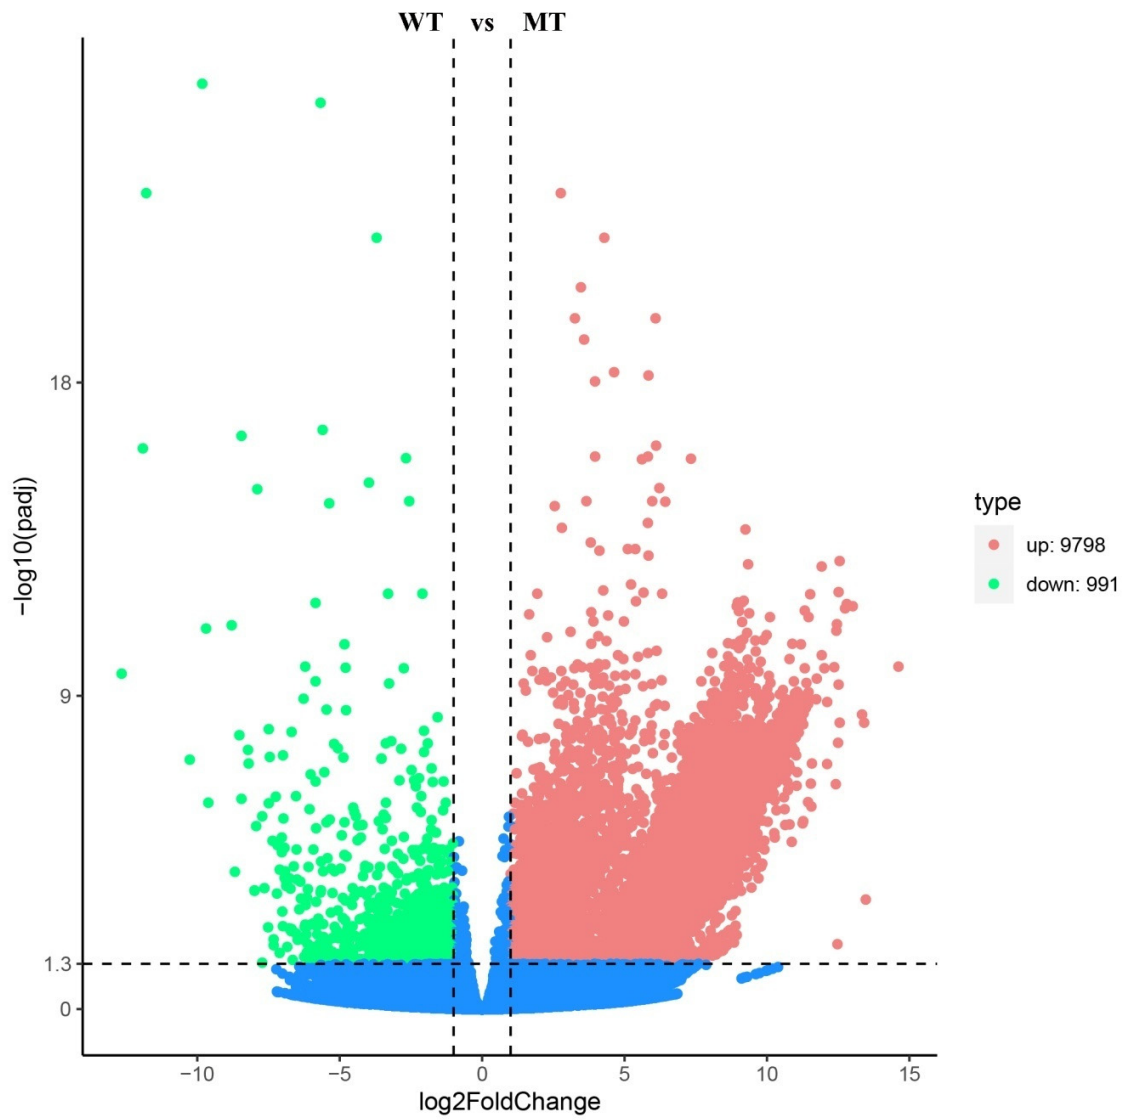

**Figure S4** Volcano map of the DEGs in leaves of mutant type and wild type of *Torreya grandis*. (WT means wild type; MT means yellow leaf mutant type)

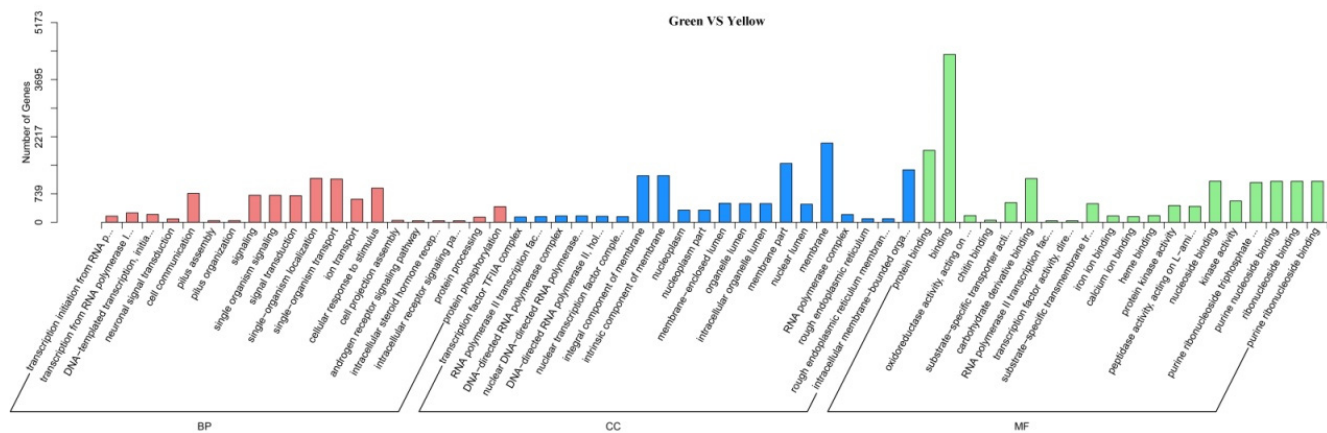

**Figure S5** GO annotation classification frequencies in leaves of the leaves of mutant type and wild type of *Torreya grandis*.

(BP, biological processes; MF, molecular function; CC, cellular component)

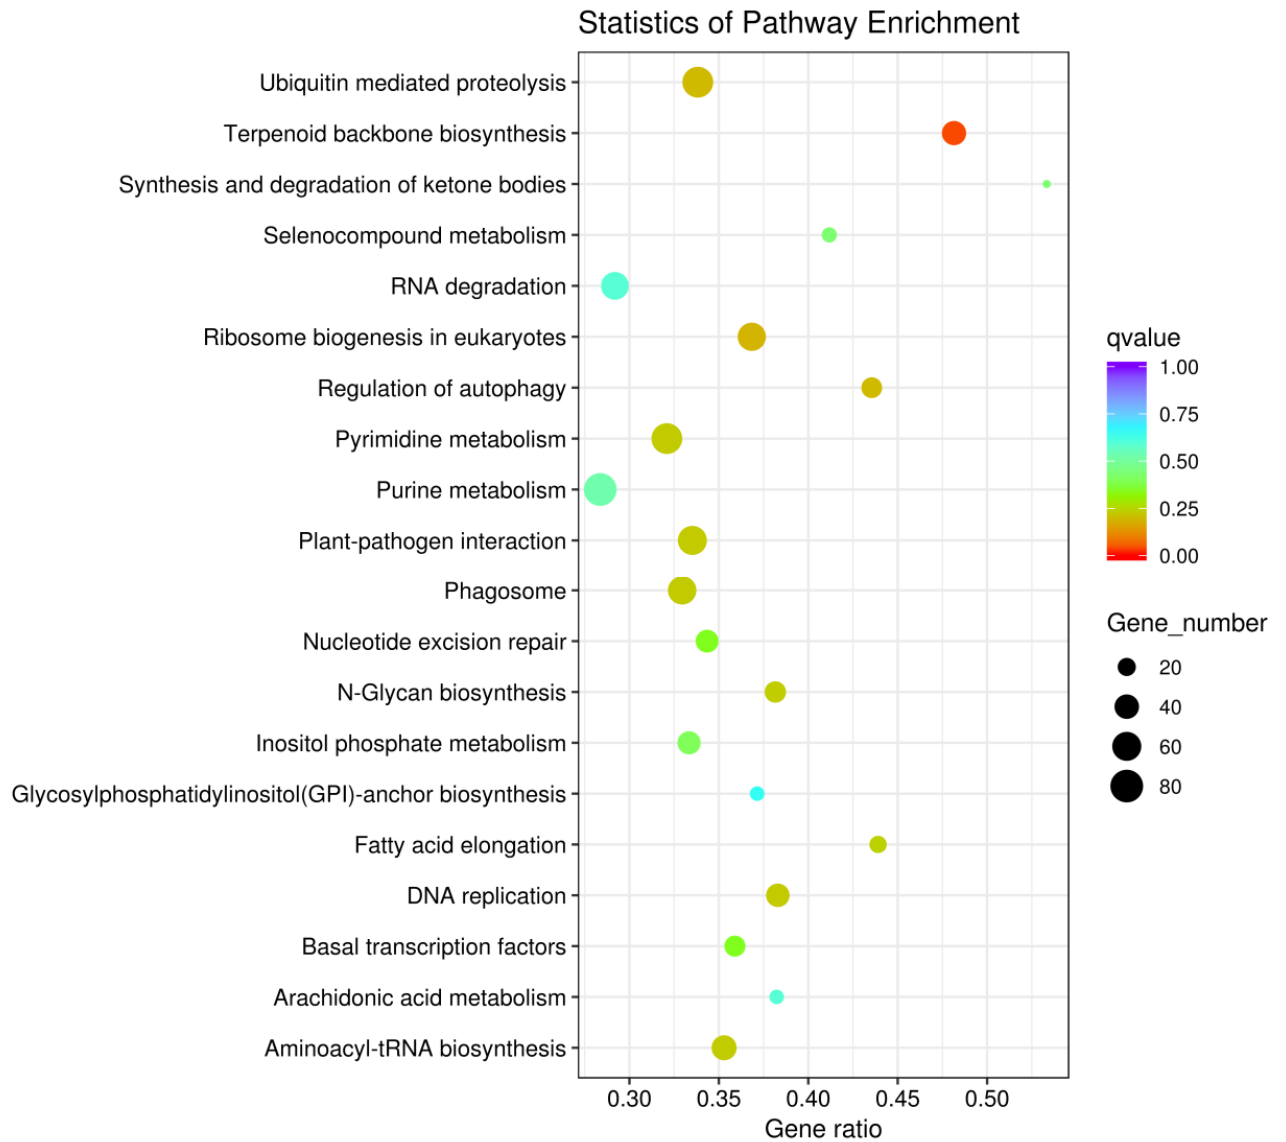

**Figure S6** KO category enrichment of up/down regulated DEGs in leaves of the leaves of mutant type and wild type of *Torreya grandis*. (The number of genes in each category is equal to the dot size. The dot color represents the q-value.)

**Table S1:** Upper and lower primer sequences of genes evaluated using qPCR experiments.

| Gene              | Unigen ID           | Upper primers          | Lower primes            |
|-------------------|---------------------|------------------------|-------------------------|
| Cyclophilin (CYP) | Cluster-41647.20988 | GGAGTGATGCCAGTGAGAAA   | ATTTGGTGGAGATGGGAGATG   |
| <i>chlL</i>       | Cluster-41647.30461 | GGAAGGTATGGCTCCCAAATTA | CATCGCAGCTAACACAGTATCT  |
| <i>hemE</i>       | Cluster-41647.18465 | CCCAGCCTGCCATTAATTCT   | TCAACTGTCCAATCCAGACTAAC |
| <i>EARS</i>       | Cluster-41647.32963 | CTGGGATTAGACTGGGATGAGA | AGCAGCATCTCCGCATATT     |
| <i>VDE</i>        | Cluster-41647.29473 | CTGGTCAATAGAGGAGGTTCAG | CAGCATTGTTCCCGAGTTAGA   |
| <i>petH</i>       | Cluster-41647.15332 | CAGGAGACAAGGTCCAGATTAC | CCAGTTCCAGTGGCTATCATTAA |
| <i>psbA</i>       | Cluster-41647.24000 | GTATTCGGCGGCTCTCTATTT  | CCTGCATTAGCGGACTCATT    |

**Table S2: Summary of sequence analysis of 6 libraries**

| Sample | Raw Reads | Clean Reads | Clean Bases | Error(%) | Q20(%) | Q30(%) | GC Content(%) |
|--------|-----------|-------------|-------------|----------|--------|--------|---------------|
| WT1    | 152501536 | 146351032   | 10.98G      | 0.02     | 98.16  | 94.06  | 43.42         |
| WT2    | 152161892 | 143308456   | 10.75G      | 0.02     | 98.26  | 94.32  | 43.44         |
| WT3    | 150322284 | 142257584   | 10.67G      | 0.02     | 98.38  | 94.57  | 43.12         |
| MT1    | 154792396 | 145770368   | 10.93G      | 0.02     | 98.31  | 94.52  | 43.27         |
| MT2    | 149870256 | 140573088   | 10.54G      | 0.02     | 98.28  | 94.37  | 43.25         |
| MT3    | 152335668 | 143390084   | 10.75G      | 0.02     | 98.4   | 94.62  | 43.53         |

(WT means wild type; MT means yellow leaf mutant type)



**Table S3:** Number of total clean reads of the 6 samples mapped to reference sequences

| Sample | Total reads | Total mapped     |
|--------|-------------|------------------|
| WT1    | 73175516    | 59205218(80.91%) |
| WT2    | 71654228    | 58128048(81.12%) |
| WT3    | 71128792    | 58230858(81.87%) |
| MT1    | 72885184    | 59632590(81.82%) |
| MT2    | 70286544    | 57556466(81.89%) |
| MT3    | 71695042    | 57895684(80.75%) |

(WT means wild type; MT means yellow leaf mutant type)

**Table S4:** Success rate statistics of transcript annotation using seven databases.

| Databases                             | Number of<br>Unigenes | Percentage (%) |
|---------------------------------------|-----------------------|----------------|
| Annotated in NR                       | 37250                 | 41.4           |
| Annotated in NT                       | 17620                 | 19.58          |
| Annotated in KO                       | 89955                 | 100            |
| Annotated in SwissProt                | 30947                 | 34.4           |
| Annotated in PFAM                     | 33717                 | 37.48          |
| Annotated in GO                       | 33713                 | 37.47          |
| Annotated in KOG                      | 13004                 | 14.45          |
| Annotated in all Databases            | 6093                  | 6.77           |
| Annotated in at least one<br>Database | 89955                 | 100            |

Note: Nr - NCBI non-redundant protein sequences; Nt - NCBI non-redundant nucleotide sequences; KO - KEGG Ortholog database; SwissPort - A manually annotated and reviewed protein sequence database; Pfam –Protein family; GO – Gene Ontology; KOG – Clusters of Orthologous Groups of proteins.

**Table S5:** The expression values of transcript data in 6 samples.
