# Supplementary material for: Molecular and Photosynthetic Performance in the Yellow Leaf Mutant of Torreya grandis According to Transcriptome Sequencing, Chlorophyll a Fluorescence, and Modulated 820 nm Reflection
Source: Cells. 2022 Jan 27;11(3):431. doi: 10.3390/cells11030431 (PMC8834079; doi:10.3390/cells11030431)
Supplement: Supplementary file 1 [file cells-11-00431-s001.zip › Table S5.xlsx]

## Sheet: Table S5
gene_id	sample_readcount(WT1)	sample_readcount(WT2)	sample_readcount(WT3)	sample_readcount(MT1)	sample_readcount(MT2)	sample_readcount(MT3)	sample_fpkm(WT1)	sample_fpkm(WT2)	sample_fpkm(WT3)	sample_fpkm(MT1)	sample_fpkm(MT2)	sample_fpkm(ＭＴ3)	Gene Length	NR GI	NR ID	NR Score	NR Evalue	NR Description	NT GI	NT ID	NT Score	NT Evalue	NT Description	KO ID	KO Name	KO Description	Http Link	Swissprot ID	Swissprot Score	Swissprot Evalue	Swissprot Description	PFAM ID	PFAM description	Gene Ontology Biological Pathway	BP Description	Gene Ontology Molecular Function	MF Description	Gene Ontology Cellular Component	CC Description	KOG ID	KOG Description	UP_DOWN_REGULATION(GvsY)	log2FC(WTvsMT)	q value(WTvsMT)	CDS_flag
Cluster-41647.2056	3	2	2	1383	1269.87	3056	0.02	0.01	0.01	8.69	8.27	19.78	5587	1079224090	XP_018504411.1	365	1.9e-31	PREDICTED: uncharacterized protein LOC103953099 isoform X2 [Pyrus x bretschneideri]	--	--	--	--	--	--	--	--	--	Q8B0U2	694	5.2e-71	RNA-directed RNA polymerase L OS=Lettuce big-vein associated virus (isolate Japan/Kagawa) OX=652962 GN=L PE=3 SV=1	PF00946	Mononegavirales RNA dependent RNA polymerase	GO:0006144//GO:0009451//GO:0006370	purine nucleobase metabolic process//RNA modification//7-methylguanosine mRNA capping	GO:0004482//GO:0003968//GO:0005524	mRNA (guanine-N7-)-methyltransferase activity//RNA-directed 5'-3' RNA polymerase activity//ATP binding	GO:0031379	RNA-directed RNA polymerase complex	--	--	DOWN	-9.8255	2.61e-27	blast,frame:-3 start:5477 end:4335
Cluster-41647.36882	19	6	15	639.84	733.5	557	0.3	0.09	0.24	9.86	11.71	8.85	2420	802627793	XP_012076832.1	1085	2.7e-115	protein BEARSKIN2 isoform X2 [Jatropha curcas]	BT107763.1	BT107763	232	3.05e-115	Picea glauca clone GQ03112_H13 mRNA sequence	-	-	-	http://www.genome.jp/dbget-bin/www_bget?ko:-	Q9M0F8	917	3.1e-97	NAC domain-containing protein 75 OS=Arabidopsis thaliana OX=3702 GN=NAC075 PE=2 SV=1	PF02365	No apical meristem (NAM) protein	GO:0006355	regulation of transcription, DNA-templated	GO:0003677	DNA binding	--	--	--	--	DOWN	-5.669	9.15e-27	blast,frame:3 start:678 end:2102
Cluster-41647.36264	1	5	0	3828.59	3758.14	10999.6	0.02	0.08	0	59.39	60.44	175.98	2405	1572912780	RZC00841.1	496	5.3e-47	Inositol oxygenase 1 isoform D [Glycine soja]	LT669795.1	LT669795	70	3.45e-25	Arabis alpina genome assembly, chromosome: 8	K00469	MIOX	inositol oxygenase	http://www.genome.jp/dbget-bin/www_bget?ko:K00469	Q8L799	287	3.5e-24	Inositol oxygenase 1 OS=Arabidopsis thaliana OX=3702 GN=MIOX1 PE=2 SV=1	PF05478//PF05153	Prominin//Myo-inositol oxygenase	GO:0019310//GO:0055114	inositol catabolic process//oxidation-reduction process	GO:0005506//GO:0050113	iron ion binding//inositol oxygenase activity	GO:0016021//GO:0005737	integral component of membrane//cytoplasm	KOG1573	Aldehyde reductase	DOWN	-11.783	3.57e-24	blast,frame:1 start:1009 end:1122
Cluster-41647.11038	1084.97	1262.99	1178.96	225	155	122	89.19	99.53	94.32	17.33	12.42	9.76	675	1557868589	RWR90658.1	659	1.9e-66	putative cysteine desulfurase [Cinnamomum micranthum f. kanehirae]	--	--	--	--	--	-	-	-	http://www.genome.jp/dbget-bin/www_bget?ko:-	--	--	--	--	PF00257	Dehydrin	GO:0009415	response to water	--	--	--	--	--	--	UP	2.7643	3.57e-24	blast,frame:-2 start:674 end:3
Cluster-41647.19453	1282.92	1390.01	1672.56	118	58	44	22.13	24.11	29.06	2	1.02	0.77	2225	356518848	XP_003528089.1	271	6.1e-21	ethylene-responsive transcription factor ERF114 [Glycine max]	XM_031097575.1	XM_031097575	59	4.15e-19	PREDICTED: Quercus lobata ethylene-responsive transcription factor ERF113-like (LOC115976351), mRNA	-	-	-	http://www.genome.jp/dbget-bin/www_bget?ko:-	Q9FH54	259	5.7e-21	Ethylene-responsive transcription factor ERF114 OS=Arabidopsis thaliana OX=3702 GN=ERF114 PE=1 SV=1	PF15202//PF00515	Adipogenin//Tetratricopeptide repeat	GO:0045444	fat cell differentiation	GO:0005515	protein binding	--	--	--	--	UP	4.2844	6.94e-23	blast,frame:2 start:761 end:1666
Cluster-41647.26590	33.02	33	26	444.97	298.96	382.77	2.82	2.69	2.16	35.5	24.8	31.73	660	--	--	--	--	--	--	--	--	--	--	--	--	--	--	--	--	--	--	--	--	--	--	--	--	--	--	--	--	DOWN	-3.6947	6.94e-23	estscan,start:145 end:1; minus strand
Cluster-41647.34744	260	265.75	318	31.94	22	19	3.76	3.88	4.65	0.45	0.32	0.28	2600	743770736	XP_010915660.1	2218	1.2e-246	endoglucanase 19 [Elaeis guineensis]	BT109863.1	BT109863	599	0	Picea glauca clone GQ03213_B21 mRNA sequence	-	-	-	http://www.genome.jp/dbget-bin/www_bget?ko:-	Q8L7I0	2072	3.9e-231	Endoglucanase 19 OS=Arabidopsis thaliana OX=3702 GN=At4g11050 PE=2 SV=1	PF00759//PF11789//PF08267//PF09478	Glycosyl hydrolase family 9//Zinc-finger of the MIZ type in Nse subunit//Cobalamin-independent synthase, N-terminal domain//Carbohydrate binding domain CBM49	GO:0008652//GO:0005975//GO:0009086	cellular amino acid biosynthetic process//carbohydrate metabolic process//methionine biosynthetic process	GO:0008270//GO:0003871//GO:0004553//GO:0030246	zinc ion binding//5-methyltetrahydropteroyltriglutamate-homocysteine S-methyltransferase activity//hydrolase activity, hydrolyzing O-glycosyl compounds//carbohydrate binding	--	--	--	--	UP	3.4752	1.79e-21	blast,frame:2 start:287 end:2221
Cluster-41647.18334	2693.45	3251.06	4551.66	93.96	45.01	17	122.33	145.34	205.05	4.1	2.04	0.77	1009	--	--	--	--	--	--	--	--	--	--	--	--	--	--	--	--	--	--	PF00523	Fusion glycoprotein F0	GO:0019064	fusion of virus membrane with host plasma membrane	--	--	--	--	--	--	UP	6.0902	1.41e-20	estscan,start:185 end:685
Cluster-41647.23288	3338	4601	5339	560	365	396	54.62	75.76	88.05	8.99	6.08	6.56	2331	1344044064	XP_023902005.1	1846	1.5e-203	cationic amino acid transporter 5 isoform X2 [Quercus suber]	XM_020395745.1	XM_020395745	126	2.47e-56	PREDICTED: Asparagus officinalis cationic amino acid transporter 5 (LOC109828800), transcript variant X2, mRNA	-	-	-	http://www.genome.jp/dbget-bin/www_bget?ko:-	O64759	1711	2.6e-189	Cationic amino acid transporter 5 OS=Arabidopsis thaliana OX=3702 GN=CAT5 PE=1 SV=1	PF07527//PF13520//PF03845//PF00324//PF10166	Hairy Orange//Amino acid permease//Spore germination protein//Amino acid permease//Uncharacterised conserved protein (DUF2368)	GO:0009847//GO:0010756//GO:0006355//GO:0055085	spore germination//positive regulation of plasminogen activation//regulation of transcription, DNA-templated//transmembrane transport	GO:0022857//GO:0003677	transmembrane transporter activity//DNA binding	GO:0016021//GO:0016020//GO:0005887	integral component of membrane//membrane//integral component of plasma membrane	KOG1286	Amino acid transporters	UP	3.2679	1.41e-20	blast,frame:-2 start:2231 end:378
Cluster-41647.32405	1250	1687	1547	158	139	68	14.55	19.84	18.2	1.81	1.65	0.8	3169	390979604	BAM21553.1	2212	7.3e-246	hypothetical protein, partial [Cryptomeria japonica]	--	--	--	--	--	-	-	-	http://www.genome.jp/dbget-bin/www_bget?ko:-	Q6JN46	986	4.1e-105	Receptor-like protein EIX2 OS=Solanum lycopersicum OX=4081 GN=EIX2 PE=1 SV=2	PF13516//PF05439//PF00560//PF04736//PF13855	Leucine Rich repeat//Jumping translocation breakpoint protein (JTB)//Leucine Rich Repeat//Eclosion hormone//Leucine rich repeat	GO:0018990//GO:0007218	ecdysis, chitin-based cuticle//neuropeptide signaling pathway	GO:0005515//GO:0008255	protein binding//ecdysis-triggering hormone activity	GO:0016021	integral component of membrane	--	--	UP	3.5804	5.79e-20	blast,frame:-2 start:3126 end:118
Cluster-41647.16187	878.79	1429.14	1271	76	26	39	29.82	48.15	43.05	2.5	0.89	1.33	1261	1248280993	ATG29992.1	1196	1.9e-128	CYP750C20 [Taxus chinensis]	--	--	--	--	--	K20562	CYP736A	biphenyl-4-hydroxylase	http://www.genome.jp/dbget-bin/www_bget?ko:K20562	Q50EK4	880	3.2e-93	Cytochrome P450 750A1 OS=Pinus taeda OX=3352 GN=CYP750A1 PE=2 SV=1	PF00067	Cytochrome P450	GO:0055114	oxidation-reduction process	GO:0020037//GO:0016705//GO:0005506	heme binding//oxidoreductase activity, acting on paired donors, with incorporation or reduction of molecular oxygen//iron ion binding	--	--	--	--	UP	4.6271	4.99e-19	estscan,start:371 end:1261
Cluster-38863.0	273	670	365	11	6	5	3.68	9.11	4.97	0.15	0.08	0.07	2773	1573259080	RZC64305.1	1234	1.6e-132	hypothetical protein C5167_007997 [Papaver somniferum]	--	--	--	--	--	K04733	IRAK4	interleukin-1 receptor-associated kinase 4	http://www.genome.jp/dbget-bin/www_bget?ko:K04733	Q9LXA5	946	1.5e-100	L-type lectin-domain containing receptor kinase IX.1 OS=Arabidopsis thaliana OX=3702 GN=LECRK91 PE=1 SV=1	PF00069//PF02438//PF03388//PF07714//PF06444//PF00139	Protein kinase domain//Late 100kD protein//Legume-like lectin family//Protein tyrosine and serine/threonine kinase//NADH dehydrogenase subunit 2 C-terminus//Legume lectin domain	GO:0039704//GO:0039657//GO:0006468//GO:0006814//GO:0006744//GO:0055114//GO:0006120	viral translational shunt//suppression by virus of host gene expression//protein phosphorylation//sodium ion transport//ubiquinone biosynthetic process//oxidation-reduction process//mitochondrial electron transport, NADH to ubiquinone	GO:0005524//GO:0008137//GO:0003723//GO:0004672//GO:0030246	ATP binding//NADH dehydrogenase (ubiquinone) activity//RNA binding//protein kinase activity//carbohydrate binding	GO:0016020	membrane	--	--	UP	5.841	6.19e-19	estscan,start:1 end:2706
Cluster-41647.28390	454	784	578	47	26	38	34.03	56.62	42.32	3.32	1.91	2.78	715	148909941	ABR18056.1	266	7.4e-21	unknown [Picea sitchensis]	--	--	--	--	--	-	-	-	http://www.genome.jp/dbget-bin/www_bget?ko:-	F4J8G2	186	5.3e-13	Receptor-like protein 33 OS=Arabidopsis thaliana OX=3702 GN=RLP33 PE=3 SV=1	PF13516//PF00560//PF13855	Leucine Rich repeat//Leucine Rich Repeat//Leucine rich repeat	--	--	GO:0005515	protein binding	--	--	--	--	UP	3.9573	9.31e-19	estscan,start:236 end:1; minus strand
Cluster-41647.782	14	9	5	306	407	525	0.21	0.14	0.08	4.51	6.23	7.99	2516	294463898	ADE77471.1	827	2.3e-85	unknown [Picea sitchensis]	--	--	--	--	--	-	-	-	http://www.genome.jp/dbget-bin/www_bget?ko:-	Q8GXI9	294	5.6e-25	SNF1-related protein kinase regulatory subunit gamma-like PV42b OS=Arabidopsis thaliana OX=3702 GN=PV42B PE=2 SV=1	PF04083	Partial alpha/beta-hydrolase lipase region	GO:0006629	lipid metabolic process	--	--	--	--	--	--	DOWN	-5.5969	2.23e-17	blast,frame:-1 start:1319 end:507
Cluster-41647.7147	0	2	4	533	433	952	0	0.02	0.03	4.02	3.39	7.41	4688	1129207299	OLQ09244.1	218	1.8e-14	CMP-sialic acid transporter 5 [Symbiodinium microadriaticum]	--	--	--	--	--	--	--	--	--	Q8B0U2	1881	9.9e-209	RNA-directed RNA polymerase L OS=Lettuce big-vein associated virus (isolate Japan/Kagawa) OX=652962 GN=L PE=3 SV=1	PF00946	Mononegavirales RNA dependent RNA polymerase	GO:0006144//GO:0009451//GO:0006370	purine nucleobase metabolic process//RNA modification//7-methylguanosine mRNA capping	GO:0003968//GO:0004482//GO:0005524	RNA-directed 5'-3' RNA polymerase activity//mRNA (guanine-N7-)-methyltransferase activity//ATP binding	GO:0031379	RNA-directed RNA polymerase complex	--	--	DOWN	-8.4537	3.32e-17	blast,frame:3 start:3 end:4442
Cluster-41647.26607	338.73	335.5	900.33	8.53	6.74	6	12.13	11.91	32.14	0.3	0.24	0.21	1209	922356768	XP_003615565.2	369	1.4e-32	receptor-like protein EIX1 [Medicago truncatula]	--	--	--	--	--	-	-	-	http://www.genome.jp/dbget-bin/www_bget?ko:-	F4HTV4	326	5.3e-29	Receptor-like protein 14 OS=Arabidopsis thaliana OX=3702 GN=RLP14 PE=3 SV=1	PF00560//PF13855//PF13516	Leucine Rich Repeat//Leucine rich repeat//Leucine Rich repeat	--	--	GO:0005515	protein binding	--	--	--	--	UP	6.1102	6.41e-17	estscan,start:1209 end:1; minus strand
Cluster-41647.37095	0	0	0	613	933.08	476.15	0	0	0	3.92	6.19	3.14	5486	1273164270	PIA45992.1	386	6.9e-34	hypothetical protein AQUCO_01600333v1 [Aquilegia coerulea]	--	--	--	--	--	--	--	--	--	Q8B0U2	640	9.3e-65	RNA-directed RNA polymerase L OS=Lettuce big-vein associated virus (isolate Japan/Kagawa) OX=652962 GN=L PE=3 SV=1	PF00946//PF01466	Mononegavirales RNA dependent RNA polymerase//Skp1 family, dimerisation domain	GO:0006511//GO:0006370//GO:0009451//GO:0006144	ubiquitin-dependent protein catabolic process//7-methylguanosine mRNA capping//RNA modification//purine nucleobase metabolic process	GO:0004482//GO:0005524//GO:0003968	mRNA (guanine-N7-)-methyltransferase activity//ATP binding//RNA-directed 5'-3' RNA polymerase activity	GO:0031379	RNA-directed RNA polymerase complex	--	--	DOWN	-11.913	7.63e-17	blast,frame:-3 start:5412 end:4237
Cluster-41647.23014	220.49	357.28	599.02	7.71	8	4	16.46	25.7	43.67	0.54	0.58	0.29	717	1353906359	PQQ19621.1	374	2.2e-33	receptor-like protein 12 [Prunus yedoensis var. nudiflora]	--	--	--	--	--	-	-	-	http://www.genome.jp/dbget-bin/www_bget?ko:-	F4JGB6	258	2.4e-21	Receptor-like protein 46 OS=Arabidopsis thaliana OX=3702 GN=RLP46 PE=3 SV=1	PF00560//PF13516//PF13855	Leucine Rich Repeat//Leucine Rich repeat//Leucine rich repeat	--	--	GO:0005515	protein binding	--	--	--	--	UP	5.8294	1.3e-16	blast,frame:3 start:3 end:164
Cluster-41647.26798	272	472	282	20	25	17	3.78	6.61	3.95	0.27	0.35	0.24	2698	769807515	XP_006847936.2	1719	9.2e-189	cysteine-rich receptor-like protein kinase 2 isoform X2 [Amborella trichopoda]	--	--	--	--	--	K04733	IRAK4	interleukin-1 receptor-associated kinase 4	http://www.genome.jp/dbget-bin/www_bget?ko:K04733	Q9CAL3	1038	3.2e-111	Cysteine-rich receptor-like protein kinase 2 OS=Arabidopsis thaliana OX=3702 GN=CRK2 PE=1 SV=1	PF07714//PF00069//PF04971	Protein tyrosine and serine/threonine kinase//Protein kinase domain//Bacteriophage P21 holin S	GO:0006468//GO:0019835	protein phosphorylation//cytolysis	GO:0004672//GO:0005524	protein kinase activity//ATP binding	--	--	--	--	UP	3.9679	1.34e-16	blast,frame:-3 start:2696 end:708
Cluster-41647.21055	4668.43	5327.71	3861.63	35618.4	31237.7	18450.6	118.83	135.51	98.56	883.93	804.1	472.77	1593	148907999	ABR17119.1	1045	7.7e-111	unknown [Picea sitchensis]	JF519746.1	JF519746	194	2.65e-94	Taxus baccata expansin B mRNA, partial cds	-	-	-	http://www.genome.jp/dbget-bin/www_bget?ko:-	O22874	961	1.6e-102	Expansin-A8 OS=Arabidopsis thaliana OX=3702 GN=EXPA8 PE=2 SV=1	--	--	--	--	--	--	--	--	--	--	DOWN	-2.6701	1.48e-16	blast,frame:-1 start:1005 end:364|blast,frame:-2 start:1217 end:1011
Cluster-41647.24566	1684	702	2547	19	10	2	41.95	17.48	63.64	0.46	0.25	0.05	1622	116788347	ABK24844.1	457	1.2e-42	unknown [Picea sitchensis]	--	--	--	--	--	-	-	-	http://www.genome.jp/dbget-bin/www_bget?ko:-	--	--	--	--	PF00130	Phorbol esters/diacylglycerol binding domain (C1 domain)	GO:0035556	intracellular signal transduction	--	--	--	--	--	--	UP	7.3384	1.55e-16	blast,frame:-2 start:1405 end:533
Cluster-41647.15973	586	539	1085	25	15	5	12.85	11.84	23.9	0.54	0.33	0.11	1807	116788833	ABK25017.1	1688	2.4e-185	unknown [Picea sitchensis]	BT102859.1	BT102859	412	0	Picea glauca clone GQ0201_N05 mRNA sequence	K01728	pel	pectate lyase	http://www.genome.jp/dbget-bin/www_bget?ko:K01728	Q9C5M8	1583	1.4e-174	Probable pectate lyase 18 OS=Arabidopsis thaliana OX=3702 GN=At4g24780 PE=2 SV=2	PF07931	Chloramphenicol phosphotransferase-like protein	--	--	GO:0016740//GO:0005524	transferase activity//ATP binding	--	--	--	--	UP	5.6174	1.57e-16	blast,frame:1 start:1 end:1425
Cluster-41647.1676	31	32	44	733	331	549	0.49	0.51	0.7	11.37	5.33	8.79	2404	1130848143	GAV71472.1	1729	5.7e-190	DUF2828 domain-containing protein [Cephalotus follicularis]	--	--	--	--	--	-	-	-	http://www.genome.jp/dbget-bin/www_bget?ko:-	Q5UNY4	504	2.4e-49	Uncharacterized protein L728 OS=Acanthamoeba polyphaga mimivirus OX=212035 GN=MIMI_L728 PE=4 SV=1	--	--	--	--	--	--	--	--	--	--	DOWN	-3.9777	7.51e-16	blast,frame:3 start:3 end:2030
Cluster-41647.26261	1407.96	1533.88	3195.46	47.99	27.99	7	48.31	52.24	109.41	1.6	0.97	0.24	1250	587907284	EXB95298.1	590	3.5e-58	LRR receptor-like serine/threonine-protein kinase FLS2 [Morus notabilis]	--	--	--	--	--	-	-	-	http://www.genome.jp/dbget-bin/www_bget?ko:-	Q6JN46	462	9.2e-45	Receptor-like protein EIX2 OS=Solanum lycopersicum OX=4081 GN=EIX2 PE=1 SV=2	PF02504//PF13855//PF00560//PF13516	Fatty acid synthesis protein//Leucine rich repeat//Leucine Rich Repeat//Leucine Rich repeat	GO:0006633	fatty acid biosynthetic process	GO:0016747//GO:0005515//GO:0003824	transferase activity, transferring acyl groups other than amino-acyl groups//protein binding//catalytic activity	--	--	--	--	UP	6.2289	1.08e-15	blast,frame:1 start:1 end:987
Cluster-41647.35933	10	5	8	951.42	573.64	3268.91	0.19	0.09	0.15	17.48	10.93	61.96	2068	548853022	ERN11028.1	1054	9.1e-112	hypothetical protein AMTR_s00024p00069030 [Amborella trichopoda]	--	--	--	--	--	-	-	-	http://www.genome.jp/dbget-bin/www_bget?ko:-	Q9SIS4	930	8.3e-99	Type IV inositol polyphosphate 5-phosphatase 9 OS=Arabidopsis thaliana OX=3702 GN=IP5P9 PE=1 SV=1	--	--	--	--	--	--	--	--	--	--	DOWN	-7.8945	1.16e-15	estscan,start:181 end:1608
Cluster-41647.26602	461.82	565.91	1294.76	21	11	5	47.61	55.14	128.6	2	1.09	0.5	591	1562658216	RXH98593.1	264	1e-20	hypothetical protein DVH24_010918 [Malus domestica]	--	--	--	--	--	-	-	-	http://www.genome.jp/dbget-bin/www_bget?ko:-	Q9S9U3	183	9.8e-13	Receptor-like protein 53 OS=Arabidopsis thaliana OX=3702 GN=RLP53 PE=3 SV=1	PF13516//PF13855//PF00560	Leucine Rich repeat//Leucine rich repeat//Leucine Rich Repeat	--	--	GO:0005515	protein binding	--	--	--	--	UP	5.9717	2.51e-15	blast,frame:-2 start:590 end:3
Cluster-41647.13757	312.84	466.17	524.78	48.56	29	22	19.14	27.75	31.58	2.82	1.75	1.33	817	1248280813	ATG29902.1	1018	5.3e-108	CYP76AA67 [Taxus chinensis]	MF448581.1	MF448581	311	1.22e-159	Taxus wallichiana var. chinensis CYP76AA67 mRNA, complete cds	K20618	CYP76A	cytochrome P450 family 76 subfamily A	http://www.genome.jp/dbget-bin/www_bget?ko:K20618	Q8VWZ7	662	3.9e-68	Geraniol 8-hydroxylase OS=Catharanthus roseus OX=4058 GN=CYP76B6 PE=1 SV=1	PF00067//PF05393	Cytochrome P450//Human adenovirus early E3A glycoprotein	GO:0055114	oxidation-reduction process	GO:0005506//GO:0016705//GO:0020037	iron ion binding//oxidoreductase activity, acting on paired donors, with incorporation or reduction of molecular oxygen//heme binding	GO:0016021	integral component of membrane	--	--	UP	3.6678	2.51e-15	estscan,start:817 end:1; minus strand
Cluster-41647.22010	296.02	321.04	237.09	1968.28	1805.76	1073.95	19.67	20.68	15.45	123.88	118.1	70.09	773	148907999	ABR17119.1	813	3e-84	unknown [Picea sitchensis]	AK416557.1	AK416557	63	8.36e-22	Cryptomeria japonica mRNA, clone: CSFL024_B18, expressed in reproductive shoots	-	-	-	http://www.genome.jp/dbget-bin/www_bget?ko:-	Q9C554	748	3.9e-78	Expansin-A1 OS=Arabidopsis thaliana OX=3702 GN=EXPA1 PE=2 SV=1	--	--	--	--	--	--	--	--	--	--	DOWN	-2.5568	2.51e-15	estscan,start:568 end:1; minus strand
Cluster-41647.26601	292.08	395.2	980.96	9	7	3	23.44	30.45	76.7	0.68	0.55	0.23	685	1570201861	RYQ86762.1	255	1.3e-19	hypothetical protein Ahy_B10g106398 isoform C [Arachis hypogaea]	--	--	--	--	--	-	-	-	http://www.genome.jp/dbget-bin/www_bget?ko:-	Q9LJW7	150	7.6e-09	Receptor-like protein 43 OS=Arabidopsis thaliana OX=3702 GN=RLP43 PE=2 SV=1	PF13855//PF00560//PF13516	Leucine rich repeat//Leucine Rich Repeat//Leucine Rich repeat	--	--	GO:0005515	protein binding	--	--	--	--	UP	6.4304	2.61e-15	estscan,start:1 end:685
Cluster-41647.36261	25	17	21	662.26	450.26	1239.9	0.84	0.57	0.7	21.57	15.21	41.72	1271	1201301767	OVA03880.1	144	1.8e-06	Cystinosin/ERS1p repeat [Macleaya cordata]	--	--	--	--	--	-	-	-	http://www.genome.jp/dbget-bin/www_bget?ko:-	--	--	--	--	--	--	--	--	--	--	--	--	--	--	DOWN	-5.3648	2.9e-15	blast,frame:3 start:3 end:581|blast,frame:1 start:979 end:1092|blast,frame:2 start:470 end:712
Cluster-41647.21746	3944.14	4253.65	3446.73	766	749.99	408	44	47.94	38.86	8.42	8.54	4.62	3296	1557870897	RWR92389.1	542	3.4e-52	putative cysteine desulfurase [Cinnamomum micranthum f. kanehirae]	--	--	--	--	--	-	-	-	http://www.genome.jp/dbget-bin/www_bget?ko:-	--	--	--	--	PF00155//PF00257	Aminotransferase class I and II//Dehydrin	GO:0009415//GO:0009058	response to water//biosynthetic process	GO:0030170	pyridoxal phosphate binding	--	--	--	--	UP	2.5469	3.51e-15	blast,frame:3 start:2676 end:3197|blast,frame:2 start:2204 end:2707|blast,frame:1 start:436 end:702
Cluster-41647.22359	16309.2	18029.5	53287.6	894.36	402	268.54	98.53	110.48	326.3	5.34	2.49	1.65	5862	1557846591	RWR73979.1	555	1.9e-53	pathogenesis-related protein PRB1-3-like protein [Cinnamomum micranthum f. kanehirae]	AK414024.1	AK414024	176	1.01e-83	Cryptomeria japonica mRNA, clone: CMFL043_O12, expressed in male strobili	K13449	PR1	pathogenesis-related protein 1	http://www.genome.jp/dbget-bin/www_bget?ko:K13449	P09042	501	1.3e-48	Pathogenesis-related protein 1C OS=Nicotiana tabacum OX=4097 PE=2 SV=3	PF09249	tRNA nucleotidyltransferase, second domain	GO:0008033	tRNA processing	GO:0004810//GO:0016437	tRNA adenylyltransferase activity//tRNA cytidylyltransferase activity	--	--	--	--	UP	5.8181	1.05e-14	blast,frame:1 start:3748 end:4302
Cluster-41647.17286	720	1180	1110	162	144	106	63.81	99.81	95.44	13.4	12.39	9.11	645	1248280999	ATG29995.1	534	5.6e-52	CYP750C26 [Taxus chinensis]	--	--	--	--	--	K20623	CYP92A6	typhasterol/6-deoxotyphasterol 2alpha-hydroxylase	http://www.genome.jp/dbget-bin/www_bget?ko:K20623	Q50EK4	379	2e-35	Cytochrome P450 750A1 OS=Pinus taeda OX=3352 GN=CYP750A1 PE=2 SV=1	PF00067	Cytochrome P450	GO:0055114	oxidation-reduction process	GO:0016705//GO:0005506//GO:0020037	oxidoreductase activity, acting on paired donors, with incorporation or reduction of molecular oxygen//iron ion binding//heme binding	--	--	--	--	UP	2.8082	1.47e-14	blast,frame:-3 start:517 end:2
Cluster-41647.5825	301	740	1406.57	3	1	0	2.33	5.8	11.03	0.02	0.01	0	4633	1344018905	XP_023892253.1	589	1.7e-57	cell division control protein 3-like [Quercus suber]	--	--	--	--	--	K16944	SEPT7, CDC3	septin 7	http://www.genome.jp/dbget-bin/www_bget?ko:K16944	A1L0Y5	773	3e-80	Septin-2B OS=Xenopus tropicalis OX=8364 GN=sept2-B PE=2 SV=1	PF00931//PF00009//PF00735//PF03193//PF12443//PF00158//PF00005//PF01926	NB-ARC domain//Elongation factor Tu GTP binding domain//Septin//RsgA GTPase//AT-hook-containing transcription factor//Sigma-54 interaction domain//ABC transporter//50S ribosome-binding GTPase	GO:0006355//GO:0001837	regulation of transcription, DNA-templated//epithelial to mesenchymal transition	GO:0043531//GO:0008134//GO:0005524//GO:0003924//GO:0005525//GO:0000978//GO:0001228//GO:0016887	ADP binding//transcription factor binding//ATP binding//GTPase activity//GTP binding//RNA polymerase II cis-regulatory region sequence-specific DNA binding//DNA-binding transcription activator activity, RNA polymerase II-specific//ATPase activity	GO:0005667	transcription regulator complex	--	--	UP	9.2509	1.68e-14	blast,frame:-3 start:4601 end:3258
Cluster-41647.11342	1265.04	1232	2069	167.14	90	63	24.88	24.32	40.93	3.22	1.8	1.25	1984	1096242892	APA32590.1	949	1.3e-99	arogenate dehydratase [Pinus pinaster]	--	--	--	--	--	K05359	ADT, PDT	arogenate/prephenate dehydratase [EC:4.2.1.91 4.2.1.51]	http://www.genome.jp/dbget-bin/www_bget?ko:K05359	Q9SA96	637	7.5e-65	Arogenate dehydratase/prephenate dehydratase 1, chloroplastic OS=Arabidopsis thaliana OX=3702 GN=ADT1 PE=1 SV=1	PF00800	Prephenate dehydratase	GO:0006571//GO:0009094//GO:0000162	tyrosine biosynthetic process//L-phenylalanine biosynthetic process//tryptophan biosynthetic process	GO:0004664	prephenate dehydratase activity	--	--	KOG2797	Prephenate dehydratase	UP	3.8192	3.85e-14	blast,frame:3 start:3 end:1172
Cluster-41647.14058	237	163	420	7	8	4	7.22	4.95	12.8	0.21	0.25	0.12	1374	148908075	ABR17156.1	788	4.2e-81	unknown [Picea sitchensis]	--	--	--	--	--	-	-	-	http://www.genome.jp/dbget-bin/www_bget?ko:-	Q3EBR6	590	1.5e-59	Phospholipase A1-Igamma2, chloroplastic OS=Arabidopsis thaliana OX=3702 GN=At2g30550 PE=1 SV=2	PF07819//PF01764	PGAP1-like protein//Lipase (class 3)	GO:0006629	lipid metabolic process	GO:0016788	hydrolase activity, acting on ester bonds	--	--	--	--	UP	5.3804	6.1e-14	blast,frame:-2 start:1271 end:144
Cluster-41647.30579	761.58	541	1851	34	26	27	65.45	44.46	154.53	2.73	2.17	2.25	657	--	--	--	--	--	--	--	--	--	--	--	--	--	--	--	--	--	--	--	--	--	--	--	--	--	--	--	--	UP	5.121	6.11e-14	estscan,start:477 end:1; minus strand
Cluster-41647.19645	1083	1181	2286	119	88	49	48.54	52.12	101.65	5.13	3.94	2.18	1019	--	--	--	--	--	AK407631.1	AK407631	99	1.08e-41	Cryptomeria japonica mRNA, clone: CFFL014_K06, expressed in female strobili	--	--	--	--	--	--	--	--	--	--	--	--	--	--	--	--	--	--	UP	4.1277	6.7e-14	estscan,start:1019 end:335; minus strand
Cluster-41647.29314	255	172	457	6	7	2	5.61	3.79	10.1	0.13	0.16	0.04	1801	758852400	AJP06318.1	628	2e-62	LRK1 [Pinus tabuliformis]	--	--	--	--	--	-	-	-	http://www.genome.jp/dbget-bin/www_bget?ko:-	A5PHT0	282	9.9e-24	Uncharacterized protein At1g24485 OS=Arabidopsis thaliana OX=3702 GN=RWK1 PE=2 SV=2	--	--	--	--	--	--	--	--	--	--	UP	5.843	9.3e-14	blast,frame:2 start:1322 end:1462|blast,frame:1 start:142 end:1251
Cluster-41647.26419	313	1081	2069	0	0	0	3.74	13.05	25	0	0	0	3092	--	--	--	--	--	--	--	--	--	--	--	--	--	--	--	--	--	--	PF04513//PF04108//PF03127//PF09726	Baculovirus polyhedron envelope protein, PEP, C terminus//Autophagy protein Apg17//GAT domain//Macoilin family	GO:0006914//GO:0006886//GO:0023041	autophagy//intracellular protein transport//neuronal signal transduction	GO:0005198	structural molecule activity	GO:0019031//GO:0030867//GO:0019028	viral envelope//rough endoplasmic reticulum membrane//viral capsid	--	--	UP	12.546	1.33e-13	estscan,start:2422 end:331; minus strand
Cluster-41647.8307	226	1714	1988	3	3	0	2.36	18.12	21.02	0.03	0.03	0	3498	1377598228	GBG34332.1	749	3.6e-76	Ferrochelatase, mitochondrial [Hondaea fermentalgiana]	--	--	--	--	--	K01772	hemH, FECH	protoporphyrin/coproporphyrin ferrochelatase [EC:4.99.1.1 4.99.1.9]	http://www.genome.jp/dbget-bin/www_bget?ko:K01772	Q9V9S8	1005	2.8e-107	Ferrochelatase, mitochondrial OS=Drosophila melanogaster OX=7227 GN=FeCh PE=2 SV=1	PF01400//PF00762//PF01903	Astacin (Peptidase family M12A)//Ferrochelatase//CbiX	GO:0009236//GO:0015994//GO:0006783//GO:0006508	cobalamin biosynthetic process//chlorophyll metabolic process//heme biosynthetic process//proteolysis	GO:0004222//GO:0016852//GO:0004325	metalloendopeptidase activity//sirohydrochlorin cobaltochelatase activity//ferrochelatase activity	--	--	KOG1321	Protoheme ferro-lyase (ferrochelatase)	UP	9.3393	1.65e-13	blast,frame:1 start:199 end:1605
Cluster-41647.10245	313	588.81	1332	0	0	0	5.14	9.73	22.04	0	0	0	2324	--	--	--	--	--	--	--	--	--	--	--	--	--	--	Q8SPI0	168	2.1e-10	Apolipoprotein D OS=Macaca fascicularis OX=9541 GN=APOD PE=2 SV=1	PF03973	Triabin	GO:0030682	mitigation of host defenses by symbiont	--	--	--	--	--	--	UP	11.915	1.92e-13	blast,frame:1 start:418 end:1755
Cluster-41647.22426	2425.99	1383	5409.89	125	70.21	49	142.01	78.92	311.91	6.97	4.07	2.83	842	148906998	ABR16643.1	477	3e-45	unknown [Picea sitchensis]	--	--	--	--	--	-	-	-	http://www.genome.jp/dbget-bin/www_bget?ko:-	Q9LJJ7	385	5.3e-36	AAA-ATPase At3g28580 OS=Arabidopsis thaliana OX=3702 GN=At3g28580 PE=2 SV=1	PF00004	ATPase family associated with various cellular activities (AAA)	--	--	GO:0005524	ATP binding	--	--	--	--	UP	5.2301	6.25e-13	estscan,start:842 end:357; minus strand
Cluster-41647.20059	639	1404.97	811.04	72	26	45	25.71	55.85	32.46	2.79	1.05	1.81	1105	1552149202	RVW18648.1	524	1.4e-50	putative glutathione S-transferase [Vitis vinifera]	--	--	--	--	--	K00799	GST, gst	glutathione S-transferase	http://www.genome.jp/dbget-bin/www_bget?ko:K00799	Q03666	350	7.9e-32	Probable glutathione S-transferase OS=Nicotiana tabacum OX=4097 PE=2 SV=1	PF13417//PF13409//PF02798	Glutathione S-transferase, N-terminal domain//Glutathione S-transferase, N-terminal domain//Glutathione S-transferase, N-terminal domain	--	--	GO:0005515	protein binding	--	--	--	--	UP	4.2619	9.34e-13	estscan,start:1 end:879
Cluster-41647.8240	257	994	2143	0	0	0	10.6	40.5	87.91	0	0	0	1084	--	--	--	--	--	--	--	--	--	--	--	--	--	--	--	--	--	--	--	--	--	--	--	--	--	--	--	--	UP	12.519	1.05e-12	estscan,start:404 end:670
Cluster-41647.26260	486.19	593.06	1275.41	28.56	13	5	22.69	27.22	59	1.28	0.6	0.23	989	1444404368	XP_025884784.1	548	2e-53	LOW QUALITY PROTEIN: receptor-like protein EIX2 [Solanum lycopersicum]	--	--	--	--	--	-	-	-	http://www.genome.jp/dbget-bin/www_bget?ko:-	Q9C6A8	400	1.1e-37	Receptor-like protein 15 OS=Arabidopsis thaliana OX=3702 GN=RLP15 PE=3 SV=1	PF13855//PF13516//PF00560	Leucine rich repeat//Leucine Rich repeat//Leucine Rich Repeat	--	--	GO:0005515	protein binding	--	--	--	--	UP	5.6638	1.06e-12	estscan,start:1 end:989
Cluster-41647.33191	463	418	456.97	138	97	100	30.95	27.07	29.96	8.73	6.38	6.56	770	--	--	--	--	--	--	--	--	--	--	--	--	--	--	--	--	--	--	--	--	--	--	--	--	--	--	--	--	UP	1.9328	1.13e-12	estscan,start:438 end:770
Cluster-41647.7302	245	228	843	7	5	4	5.41	5.04	18.69	0.15	0.11	0.09	1797	1227425115	ASR18098.1	691	9.8e-70	R2R3MYB13 [Ginkgo biloba]	MN906709.1	MN906709	311	2.74e-159	Taxus chinensis R2R3-MYB transcription factor 34 mRNA, complete cds	K09422	MYBP	myb proto-oncogene protein, plant	http://www.genome.jp/dbget-bin/www_bget?ko:K09422	Q9C7U7	647	4.7e-66	Transcription factor MYB20 OS=Arabidopsis thaliana OX=3702 GN=MYB20 PE=2 SV=1	--	--	--	--	--	--	--	--	--	--	UP	6.3211	1.15e-12	blast,frame:-2 start:1472 end:354
Cluster-41647.21919	3808.02	4505.75	1981.76	30866.4	34596.2	29117.3	52.44	62.56	27.54	417.97	485.67	406.59	2720	--	--	--	--	--	--	--	--	--	--	--	--	--	--	--	--	--	--	PF05399//PF10717	Ectropic viral integration site 2A protein (EVI2A)//Occlusion-derived virus envelope protein ODV-E18	--	--	--	--	GO:0019031//GO:0016021	viral envelope//integral component of membrane	--	--	DOWN	-3.2924	1.17e-12	estscan,start:854 end:174; minus strand
Cluster-41647.37757	72	64	65	294	259	260	1.11	1	1.01	4.47	4.08	4.07	2451	743935478	XP_011012107.1	1528	1.2e-166	PREDICTED: probable receptor-like protein kinase At1g11050 [Populus euphratica]	--	--	--	--	--	K04733	IRAK4	interleukin-1 receptor-associated kinase 4	http://www.genome.jp/dbget-bin/www_bget?ko:K04733	O04086	1398	5.3e-153	Probable receptor-like protein kinase At1g11050 OS=Arabidopsis thaliana OX=3702 GN=At1g11050 PE=2 SV=1	PF00069//PF07714	Protein kinase domain//Protein tyrosine and serine/threonine kinase	GO:0006468	protein phosphorylation	GO:0005524//GO:0004672	ATP binding//protein kinase activity	--	--	--	--	DOWN	-2.0958	1.17e-12	blast,frame:2 start:113 end:1966
Cluster-41647.5265	416	883	2004	0	1	0	7.91	16.87	38.37	0	0.02	0	2042	--	--	--	--	--	--	--	--	--	--	--	--	--	--	--	--	--	--	PF07415	Gammaherpesvirus latent membrane protein (LMP2) protein	GO:0019042	viral latency	--	--	GO:0033644	host cell membrane	--	--	UP	11.518	1.18e-12	estscan,start:478 end:1561
Cluster-41647.16007	173	1477	1327	2	3	0	14.02	114.83	104.71	0.15	0.24	0	681	1072927128	XP_018474324.1	685	1.8e-69	PREDICTED: histone H3-like centromeric protein CSE4 [Raphanus sativus]	X56335.1	X56335	227	4.98e-113	Chironomus thummi histone H1, H2A, H2B, H3, H4 genes with TFB1 insertion (foldback transposable element)	-	-	-	http://www.genome.jp/dbget-bin/www_bget?ko:-	P84227	675	1e-69	Histone H3.2 OS=Bos taurus OX=9913 PE=1 SV=2	PF15630//PF00125	CENP-S protein//Core histone H2A/H2B/H3/H4	--	--	GO:0003677	DNA binding	GO:0000786//GO:0071821	nucleosome//FANCM-MHF complex	KOG1745	Histones H3 and H4	UP	9.1829	1.87e-12	blast,frame:-2 start:680 end:168
Cluster-41647.20618	2291	2745.01	9604.06	137	93	102	68.95	82.27	289.12	4.01	2.82	3.08	1388	--	--	--	--	--	--	--	--	--	--	--	--	--	--	--	--	--	--	PF14750	Integrator complex subunit 2	--	--	--	--	GO:0032039	integrator complex	--	--	UP	5.4101	1.93e-12	estscan,start:1 end:1255
Cluster-41647.10301	274	327	951	1	2	0	20.49	23.57	69.48	0.07	0.15	0	716	--	--	--	--	--	--	--	--	--	--	--	--	--	--	--	--	--	--	--	--	--	--	--	--	--	--	--	--	UP	8.9734	2.05e-12	estscan,start:256 end:405
Cluster-41647.29133	340	2836	3580	4.84	7	0	15.02	123.42	156.96	0.21	0.31	0	1030	758181	CAA88775.1	344	9.7e-30	NADH dehydrogenase subunit 1 (mitochondrion) [Cyanidium caldarium]	KY501475.1	KY501475	38	8.9e-08	Syndemis sp. ms557sono NADH dehydrogenase subunit 1 (ND1) gene, partial cds; mitochondrial	K03878	ND1	NADH-ubiquinone oxidoreductase chain 1	http://www.genome.jp/dbget-bin/www_bget?ko:K03878	B0FWD8	373	1.6e-34	NADH-ubiquinone oxidoreductase chain 1 OS=Aedes aegypti OX=7159 GN=mt:ND1 PE=3 SV=1	PF00146	NADH dehydrogenase	GO:0055114	oxidation-reduction process	--	--	GO:0016020	membrane	KOG4770	NADH dehydrogenase subunit 1	UP	9.1284	2.07e-12	--
Cluster-41647.36815	16	3	15	851	834.87	262	0.21	0.04	0.2	10.89	11.08	3.46	2864	769805952	XP_011625339.1	774	3.7e-79	protein GAMETE EXPRESSED 1 [Amborella trichopoda]	--	--	--	--	--	-	-	-	http://www.genome.jp/dbget-bin/www_bget?ko:-	Q681K7	626	2e-63	Protein GAMETE EXPRESSED 1 OS=Arabidopsis thaliana OX=3702 GN=GEX1 PE=1 SV=1	PF06009//PF05823//PF00119	Laminin Domain II//Nematode fatty acid retinoid binding protein (Gp-FAR-1)//ATP synthase A chain	GO:0015986//GO:0007155	ATP synthesis coupled proton transport//cell adhesion	GO:0008289//GO:0015078	lipid binding//proton transmembrane transporter activity	GO:0045263	proton-transporting ATP synthase complex, coupling factor F(o)	--	--	DOWN	-5.8537	2.12e-12	blast,frame:-3 start:2553 end:1264|blast,frame:-2 start:964 end:269
Cluster-41647.15583	190	1949	2037	0	0	0	4.91	50.28	52.74	0	0	0	1574	1210521943	GAX19378.1	237	3.8e-17	high mobility group protein B3 [Fistulifera solaris]	--	--	--	--	--	-	-	-	http://www.genome.jp/dbget-bin/www_bget?ko:-	Q24537	474	4.7e-46	High mobility group protein DSP1 OS=Drosophila melanogaster OX=7227 GN=Dsp1 PE=2 SV=1	PF02936//PF01660//PF07267//PF00178	Cytochrome c oxidase subunit IV//Viral methyltransferase//Nucleopolyhedrovirus capsid protein P87//Ets-domain	GO:0080009//GO:0006123//GO:0006396//GO:0006355//GO:0009451	mRNA methylation//mitochondrial electron transport, cytochrome c to oxygen//RNA processing//regulation of transcription, DNA-templated//RNA modification	GO:0043565//GO:0008174//GO:0004129//GO:0003700//GO:0003723	sequence-specific DNA binding//mRNA methyltransferase activity//cytochrome-c oxidase activity//DNA-binding transcription factor activity//RNA binding	GO:0005667//GO:0045277//GO:0019028	transcription regulator complex//respiratory chain complex IV//viral capsid	KOG0381	HMG box-containing protein	UP	12.809	2.25e-12	blast,frame:2 start:500 end:1180
Cluster-41647.31524	185	2331	2313	0	0	0	9.4	116.11	116.23	0	0	0	930	1102723596	OIW22071.1	178	1.5e-10	hypothetical protein TanjilG_02634 [Lupinus angustifolius]	--	--	--	--	--	-	-	-	http://www.genome.jp/dbget-bin/www_bget?ko:-	P15870	234	1.9e-18	Histone H1-delta OS=Strongylocentrotus purpuratus OX=7668 PE=3 SV=1	PF09507//PF00538//PF08281	DNA polymerase subunit Cdc27//linker histone H1 and H5 family//Sigma-70, region 4	GO:0006355//GO:0006352//GO:0006260//GO:0006334	regulation of transcription, DNA-templated//DNA-templated transcription, initiation//DNA replication//nucleosome assembly	GO:0016987//GO:0003700//GO:0003677	sigma factor activity//DNA-binding transcription factor activity//DNA binding	GO:0000786//GO:0005667//GO:0042025//GO:0005634//GO:0043625	nucleosome//transcription regulator complex//host cell nucleus//nucleus//delta DNA polymerase complex	--	--	UP	13.018	2.65e-12	blast,frame:-3 start:859 end:161
Cluster-41647.28233	2662	582	500	0	5	2	17.39	3.85	3.31	0	0.03	0.01	5441	1273164270	PIA45992.1	386	6.9e-34	hypothetical protein AQUCO_01600333v1 [Aquilegia coerulea]	--	--	--	--	--	-	-	-	http://www.genome.jp/dbget-bin/www_bget?ko:-	Q8B0U2	552	1.5e-54	RNA-directed RNA polymerase L OS=Lettuce big-vein associated virus (isolate Japan/Kagawa) OX=652962 GN=L PE=3 SV=1	PF00946//PF09392	Mononegavirales RNA dependent RNA polymerase//Type III secretion needle MxiH, YscF, SsaG, EprI, PscF, EscF	GO:0015031//GO:0009451//GO:0006370//GO:0006144//GO:0009405	protein transport//RNA modification//7-methylguanosine mRNA capping//purine nucleobase metabolic process//pathogenesis	GO:0004482//GO:0005524//GO:0003968	mRNA (guanine-N7-)-methyltransferase activity//ATP binding//RNA-directed 5'-3' RNA polymerase activity	GO:0031379	RNA-directed RNA polymerase complex	--	--	UP	8.9411	2.65e-12	blast,frame:-2 start:5326 end:4184
Cluster-41647.20494	185	2214.11	1596.16	0	0	0	3.79	45.48	32.86	0	0	0	1916	1210519476	GAX21600.1	223	1.9e-15	structure-specific recognition protein 1 [Fistulifera solaris]	--	--	--	--	--	-	-	-	http://www.genome.jp/dbget-bin/www_bget?ko:-	Q24537	453	1.6e-43	High mobility group protein DSP1 OS=Drosophila melanogaster OX=7227 GN=Dsp1 PE=2 SV=1	PF06382//PF04961	Protamine and protamine like//Formiminotransferase-cyclodeaminase	GO:0035092//GO:0044237//GO:0007283	sperm chromatin condensation//cellular metabolic process//spermatogenesis	GO:0003824	catalytic activity	--	--	KOG0381	HMG box-containing protein	UP	12.739	3.04e-12	blast,frame:1 start:637 end:1236
Cluster-41647.21083	194	450	839	0	0	0	2.74	6.41	11.96	0	0	0	2659	--	--	--	--	--	--	--	--	--	--	--	--	--	--	--	--	--	--	PF13000//PF03153//PF17511	Acetyl-coenzyme A transporter 1//Transcription factor IIA, alpha/beta subunit//Mobilization protein B	GO:0006367//GO:0015876//GO:0000746	transcription initiation from RNA polymerase II promoter//acetyl-CoA transport//conjugation	GO:0008521	acetyl-CoA transmembrane transporter activity	GO:0016021//GO:0005672	integral component of membrane//transcription factor TFIIA complex	--	--	UP	11.322	3.48e-12	estscan,start:1196 end:2075
Cluster-41647.32701	182	1535	1911	4	3	0	6.33	52.96	66.29	0.13	0.1	0	1237	--	--	--	--	--	--	--	--	--	--	--	--	--	--	--	--	--	--	--	--	--	--	--	--	--	--	--	--	UP	9.0188	3.6e-12	estscan,start:345 end:860
Cluster-41647.28426	396.12	394.94	667.7	43.99	40	16	135.98	112.05	200.75	12.27	11.67	4.74	356	669031695	CDM86810.1	236	1.1e-17	unnamed protein product [Triticum aestivum]	--	--	--	--	--	-	-	-	http://www.genome.jp/dbget-bin/www_bget?ko:-	Q6JN46	197	1.4e-14	Receptor-like protein EIX2 OS=Solanum lycopersicum OX=4081 GN=EIX2 PE=1 SV=2	PF13516//PF00560//PF13855	Leucine Rich repeat//Leucine Rich Repeat//Leucine rich repeat	--	--	GO:0005515	protein binding	--	--	--	--	UP	3.8387	3.99e-12	blast,frame:3 start:3 end:356
Cluster-41647.31781	164	1860.87	1981	3	3	0	10.51	115.76	124.65	0.18	0.19	0	792	--	--	--	--	--	--	--	--	--	--	--	--	--	--	--	--	--	--	PF06459	Ryanodine Receptor TM 4-6	GO:0006816//GO:0006874	calcium ion transport//cellular calcium ion homeostasis	GO:0005219	ryanodine-sensitive calcium-release channel activity	GO:0016021//GO:0005622	integral component of membrane//intracellular	--	--	UP	9.3701	4.16e-12	estscan,start:107 end:463
Cluster-41647.20489	1413.65	1578.96	1453	452	490	392.06	11.72	13.26	12.2	3.7	4.16	3.31	4342	1150733742	XP_020240842.1	592	7.1e-58	probable serine/threonine-protein kinase PBL9 isoform X1 [Asparagus officinalis]	XM_021821504.1	XM_021821504	121	2.79e-53	PREDICTED: Hevea brasiliensis probable serine/threonine-protein kinase PBL9 (LOC110662510), transcript variant X3, mRNA	-	-	-	http://www.genome.jp/dbget-bin/www_bget?ko:-	P46573	552	1.2e-54	Probable serine/threonine-protein kinase PBL10 OS=Arabidopsis thaliana OX=3702 GN=PBL10 PE=1 SV=2	PF07714//PF00069	Protein tyrosine and serine/threonine kinase//Protein kinase domain	GO:0006468	protein phosphorylation	GO:0005524//GO:0004672	ATP binding//protein kinase activity	--	--	--	--	UP	1.6572	4.54e-12	blast,frame:-2 start:1119 end:949|blast,frame:-3 start:2663 end:2034|blast,frame:-1 start:838 end:368
Cluster-41647.28994	304	274	599	27	18	9	8.87	7.97	17.5	0.77	0.53	0.26	1423	--	--	--	--	--	--	--	--	--	--	--	--	--	--	--	--	--	--	--	--	--	--	--	--	--	--	--	--	UP	4.4271	4.84e-12	estscan,start:1170 end:1346
Cluster-41647.9096	212	408	1005	0	0	0	1.35	2.63	6.47	0	0	0	5584	--	--	--	--	--	--	--	--	--	--	--	--	--	--	Q9BQP7	416	8.9e-39	Mitochondrial genome maintenance exonuclease 1 OS=Homo sapiens OX=9606 GN=MGME1 PE=1 SV=1	PF02390	Putative methyltransferase	GO:0009451//GO:0008033//GO:0006400	RNA modification//tRNA processing//tRNA modification	GO:0008176	tRNA (guanine-N7-)-methyltransferase activity	--	--	--	--	UP	11.457	5.51e-12	blast,frame:2 start:254 end:1024
Cluster-41647.8302	150	2281	3101	3	2	0	1.31	20.2	27.46	0.03	0.02	0	4130	1344100769	PPD75269.1	238	7.6e-17	hypothetical protein GOBAR_DD27809 [Gossypium barbadense]	KJ841937.1	KJ841937	1819	0	Trisetacus ehmanni 18S ribosomal RNA gene, complete sequence	-	-	-	http://www.genome.jp/dbget-bin/www_bget?ko:-	--	--	--	--	--	--	--	--	--	--	--	--	--	--	UP	10.115	5.51e-12	estscan,start:707 end:1078
Cluster-41647.23263	1989.93	1853.17	6028.48	113	133	60	20.61	19.4	63.12	1.15	1.41	0.63	3530	390979606	BAM21554.1	845	2.7e-87	hypothetical protein [Cryptomeria japonica]	XM_023882542.1	XM_023882542	45	4.01e-11	PREDICTED: Lactuca sativa wall-associated receptor kinase-like 1 (LOC111886305), mRNA	-	-	-	http://www.genome.jp/dbget-bin/www_bget?ko:-	C0LGI2	472	1.8e-45	Probable LRR receptor-like serine/threonine-protein kinase At1g67720 OS=Arabidopsis thaliana OX=3702 GN=At1g67720 PE=1 SV=1	PF07714//PF00069	Protein tyrosine and serine/threonine kinase//Protein kinase domain	GO:0006468	protein phosphorylation	GO:0005524//GO:0004672	ATP binding//protein kinase activity	--	--	--	--	UP	4.974	7.16e-12	blast,frame:3 start:2442 end:2603|blast,frame:2 start:2597 end:3292|blast,frame:1 start:346 end:1716
Cluster-41647.20680	2013	2145.97	2692	242	156.01	59	131.45	135.94	172.54	14.98	10.03	3.79	782	1233055254	ASU43994.1	151	1.8e-07	UDP-glycosyltransferase UGT3 [Picea glauca]	--	--	--	--	--	K21371	-	-	http://www.genome.jp/dbget-bin/www_bget?ko:K21371	O48676	137	2.8e-07	UDP-glycosyltransferase 74B1 OS=Arabidopsis thaliana OX=3702 GN=UGT74B1 PE=1 SV=1	PF00201	UDP-glucoronosyl and UDP-glucosyl transferase	--	--	GO:0016758	transferase activity, transferring hexosyl groups	--	--	--	--	UP	3.9061	7.33e-12	blast,frame:-3 start:585 end:460
Cluster-41647.10217	163	1246.32	1968	3	3	0	5.44	41.3	65.56	0.1	0.1	0	1278	323450303	EGB06185.1	467	6.5e-44	hypothetical protein AURANDRAFT_6947, partial [Aureococcus anophagefferens]	XM_022468134.1	XM_022468134	112	8.11e-49	PREDICTED: Crassostrea virginica 60S ribosomal protein L19-like (LOC111124874), mRNA	K02885	RP-L19e, RPL19	large subunit ribosomal protein L19e	http://www.genome.jp/dbget-bin/www_bget?ko:K02885	P36241	494	1.8e-48	60S ribosomal protein L19 OS=Drosophila melanogaster OX=7227 GN=RpL19 PE=1 SV=2	PF04995//PF01280	Heme exporter protein D (CcmD)//Ribosomal protein L19e	GO:0006412//GO:0015886//GO:0042254//GO:0017004	translation//heme transport//ribosome biogenesis//cytochrome complex assembly	GO:0003735	structural constituent of ribosome	GO:0016021//GO:0005840	integral component of membrane//ribosome	KOG1696	60s ribosomal protein L19	UP	9.1283	7.52e-12	blast,frame:1 start:136 end:1251
Cluster-41647.9134	200	849	2184	0	0	0	4.09	17.41	44.88	0	0	0	1919	--	--	--	--	--	--	--	--	--	--	--	--	--	--	P80518	147	4.8e-08	Adult-specific rigid cuticular protein 15.5 OS=Araneus diadematus OX=45920 PE=1 SV=1	PF00379	Insect cuticle protein	--	--	GO:0042302	structural constituent of cuticle	--	--	--	--	UP	12.451	8.65e-12	blast,frame:-1 start:1598 end:276
Cluster-41647.37094	0	1	1	223	366	241	0	0.01	0.01	1.65	2.81	1.84	4776	1129207299	OLQ09244.1	265	6.5e-20	CMP-sialic acid transporter 5 [Symbiodinium microadriaticum]	--	--	--	--	--	--	--	--	--	Q8B0U2	1927	4.7e-214	RNA-directed RNA polymerase L OS=Lettuce big-vein associated virus (isolate Japan/Kagawa) OX=652962 GN=L PE=3 SV=1	PF00946	Mononegavirales RNA dependent RNA polymerase	GO:0006370//GO:0009451//GO:0006144	7-methylguanosine mRNA capping//RNA modification//purine nucleobase metabolic process	GO:0005524//GO:0003968//GO:0004482	ATP binding//RNA-directed 5'-3' RNA polymerase activity//mRNA (guanine-N7-)-methyltransferase activity	GO:0031379	RNA-directed RNA polymerase complex	--	--	DOWN	-8.7898	9.31e-12	blast,frame:1 start:1 end:4536
Cluster-41647.36573	0	5.97	0	833.63	2973	819.11	0	0.07	0	9.71	35.91	9.84	3122	1079224090	XP_018504411.1	368	4.8e-32	PREDICTED: uncharacterized protein LOC103953099 isoform X2 [Pyrus x bretschneideri]	--	--	--	--	--	--	--	--	--	Q91QN9	285	7.7e-24	Nucleoprotein OS=Lettuce big-vein associated virus (isolate Japan/Kagawa) OX=652962 GN=N PE=3 SV=1	--	--	--	--	--	--	--	--	--	--	DOWN	-9.6941	1.17e-11	blast,frame:2 start:83 end:1258
Cluster-41647.7339	148	1310	1767	0	0	0	5.78	50.62	68.71	0	0	0	1130	3153904	AAC17448.1	921	1.3e-96	RPL5A-related protein [Helianthus annuus]	XM_030684772.1	XM_030684772	247	6.43e-124	PREDICTED: Rhodamnia argentea 60S ribosomal protein L5-like (LOC115748317), mRNA	-	-	-	http://www.genome.jp/dbget-bin/www_bget?ko:-	Q26481	1010	2.4e-108	60S ribosomal protein L5 OS=Styela clava OX=7725 GN=RPL5 PE=3 SV=3	PF02926//PF17144	THUMP domain//Ribosomal large subunit proteins 60S L5, and 50S L18	GO:0006412//GO:0042254	translation//ribosome biogenesis	GO:0008097//GO:0003723//GO:0003735	5S rRNA binding//RNA binding//structural constituent of ribosome	GO:0005840	ribosome	KOG0875	60S ribosomal protein L5	UP	12.439	1.35e-11	blast,frame:1 start:139 end:1062
Cluster-40931.0	275	245	352	49	23	26	3.52	3.17	4.55	0.62	0.3	0.34	2904	976903028	KVH90955.1	1188	3.7e-127	Leucine-rich repeat-containing protein [Cynara cardunculus var. scolymus]	--	--	--	--	--	K13420	FLS2	LRR receptor-like serine/threonine-protein kinase FLS2	http://www.genome.jp/dbget-bin/www_bget?ko:K13420	Q0JA29	966	7.8e-103	LRR receptor-like serine/threonine-protein kinase FLS2 OS=Oryza sativa subsp. japonica OX=39947 GN=FLS2 PE=1 SV=1	PF13516//PF00560//PF13855	Leucine Rich repeat//Leucine Rich Repeat//Leucine rich repeat	--	--	GO:0005515	protein binding	--	--	--	--	UP	3.1115	1.46e-11	blast,frame:-2 start:2876 end:300
Cluster-41647.27782	427	3828	6322.86	9	8	0	6.46	58.32	96.46	0.13	0.12	0	2500	1389745117	XP_024971410.1	1482	2.6e-161	heat shock protein 83 [Cynara cardunculus var. scolymus]	MH979723.1	MH979723	498	0	Tetranychus evansi heat shock 90 mRNA, complete cds	K04079	HSP90A, htpG	molecular chaperone HtpG	http://www.genome.jp/dbget-bin/www_bget?ko:K04079	Q9BLC5	1644	1.6e-181	Heat shock protein 83 OS=Bombyx mori OX=7091 GN=Hsp83 PE=1 SV=1	PF06213//PF02724//PF03666//PF00183//PF08618	Cobalamin biosynthesis protein CobT//CDC45-like protein//Nitrogen Permease regulator of amino acid transport activity 3//Hsp90 protein//Transcription factor Opi1	GO:0032007//GO:0006270//GO:0034198//GO:0006457//GO:0009236	negative regulation of TOR signaling//DNA replication initiation//cellular response to amino acid starvation//protein folding//cobalamin biosynthetic process	GO:0051082//GO:0003714//GO:0005524	unfolded protein binding//transcription corepressor activity//ATP binding	GO:0005667	transcription regulator complex	KOG0019	Molecular chaperone (HSP90 family)	UP	9.3041	1.55e-11	blast,frame:2 start:137 end:2443
Cluster-41647.13136	144	1298	1687	1	2	0	1.09	9.96	12.95	0.01	0.02	0	4727	1335041047	PNW75662.1	956	4.8e-100	hypothetical protein CHLRE_12g535851v5 [Chlamydomonas reinhardtii]	XM_030694593.1	XM_030694593	315	4.36e-161	PREDICTED: Rhodamnia argentea 60S ribosomal protein L8-like (LOC115755279), mRNA	K02938	RP-L8e, RPL8	large subunit ribosomal protein L8e	http://www.genome.jp/dbget-bin/www_bget?ko:K02938	Q6PBF0	998	2.5e-106	60S ribosomal protein L8 OS=Xenopus tropicalis OX=8364 GN=rpl8 PE=2 SV=3	PF00983//PF00507//PF04272//PF01624//PF00181//PF03947//PF00096	Tymovirus coat protein//NADH-ubiquinone/plastoquinone oxidoreductase, chain 3//Phospholamban//MutS domain I//Ribosomal Proteins L2, RNA binding domain//Ribosomal Proteins L2, C-terminal domain//Zinc finger, C2H2 type	GO:0055114//GO:0042254//GO:0006816//GO:0006298//GO:0006814//GO:0006412//GO:0006744//GO:0006810//GO:0006120	oxidation-reduction process//ribosome biogenesis//calcium ion transport//mismatch repair//sodium ion transport//translation//ubiquinone biosynthetic process//transport//mitochondrial electron transport, NADH to ubiquinone	GO:0003676//GO:0003735//GO:0008137//GO:0005246//GO:0005198//GO:0042030//GO:0005524//GO:0030983	nucleic acid binding//structural constituent of ribosome//NADH dehydrogenase (ubiquinone) activity//calcium channel regulator activity//structural molecule activity//ATPase inhibitor activity//ATP binding//mismatched DNA binding	GO:0019028//GO:0016020//GO:0005840	viral capsid//membrane//ribosome	KOG2309	60s ribosomal protein L2/L8	UP	9.9839	1.81e-11	blast,frame:2 start:3152 end:3937
Cluster-41647.11773	261	456.95	305	34	10	15	7.65	13.35	8.95	0.97	0.3	0.44	1418	148909941	ABR18056.1	1071	6.7e-114	unknown [Picea sitchensis]	--	--	--	--	--	-	-	-	http://www.genome.jp/dbget-bin/www_bget?ko:-	Q9LHP4	728	1.5e-75	Receptor-like protein kinase 2 OS=Arabidopsis thaliana OX=3702 GN=RCH2 PE=1 SV=1	PF00560//PF13516//PF13855	Leucine Rich Repeat//Leucine Rich repeat//Leucine rich repeat	--	--	GO:0005515	protein binding	--	--	--	--	UP	4.0812	1.9e-11	estscan,start:1 end:1418
Cluster-41647.12776	574.98	430.86	496.82	127.65	103	67.97	25.67	18.94	22.01	5.48	4.59	3.02	1022	1248280915	ATG29953.1	277	5.6e-22	CYP720B26 [Taxus chinensis]	--	--	--	--	--	-	-	-	http://www.genome.jp/dbget-bin/www_bget?ko:-	Q50EK5	245	1.1e-19	Cytochrome P450 720B2 OS=Pinus taeda OX=3352 GN=CYP720B2 PE=2 SV=1	PF00067	Cytochrome P450	GO:0055114	oxidation-reduction process	GO:0005506//GO:0016705//GO:0020037	iron ion binding//oxidoreductase activity, acting on paired donors, with incorporation or reduction of molecular oxygen//heme binding	--	--	--	--	UP	2.2819	2.02e-11	blast,frame:1 start:523 end:738
Cluster-41647.9852	138	1429.14	1929	3	3	0	2.29	23.9	32.31	0.05	0.05	0	2299	1279074834	XP_022899606.1	858	5.4e-89	40S ribosomal protein S2-3-like [Olea europaea var. sylvestris]	XM_026954112.1	XM_026954112	168	1.1e-79	PREDICTED: Rhopalosiphum maidis 40S ribosomal protein S2 (LOC113551709), mRNA	K02981	RP-S2e, RPS2	small subunit ribosomal protein S2e	http://www.genome.jp/dbget-bin/www_bget?ko:K02981	P31009	940	6.4e-100	40S ribosomal protein S2 OS=Drosophila melanogaster OX=7227 GN=RpS2 PE=1 SV=2	PF00333//PF00034//PF13442//PF03719	Ribosomal protein S5, N-terminal domain//Cytochrome c//Cytochrome C oxidase, cbb3-type, subunit III//Ribosomal protein S5, C-terminal domain	GO:0006118//GO:0042254//GO:0006412	obsolete electron transport//ribosome biogenesis//translation	GO:0009055//GO:0020037//GO:0003723//GO:0003735	electron transfer activity//heme binding//RNA binding//structural constituent of ribosome	GO:0005840	ribosome	KOG0877	40S ribosomal protein S2/30S ribosomal protein S5	UP	9.1778	2.36e-11	blast,frame:1 start:202 end:957
Cluster-41647.10411	135	1575	2031	3	1	0	4.71	54.56	70.74	0.1	0.04	0	1233	1333490456	PNR61958.1	728	3.4e-74	hypothetical protein PHYPA_000382 [Physcomitrella patens]	--	--	--	--	--	K02941	RP-LP0, RPLP0	large subunit ribosomal protein LP0	http://www.genome.jp/dbget-bin/www_bget?ko:K02941	Q93572	1003	1.7e-107	60S acidic ribosomal protein P0 OS=Caenorhabditis elegans OX=6239 GN=rla-0 PE=1 SV=3	PF00466	Ribosomal protein L10	GO:0042254	ribosome biogenesis	--	--	--	--	KOG0815	60S acidic ribosomal protein P0	UP	9.8801	2.44e-11	blast,frame:-2 start:1103 end:132
Cluster-41647.10190	173.98	1564.02	2263.02	1	4	0	4.08	36.74	53.33	0.02	0.1	0	1705	544214195	XP_005537244.1	1017	1.5e-107	ADP/ATP translocase [Cyanidioschyzon merolae strain 10D]	XM_031773163.1	XM_031773163	232	2.14e-115	PREDICTED: Contarinia nasturtii ADP,ATP carrier protein (LOC116344551), mRNA	K05863	SLC25A4S, ANT	solute carrier family 25 (mitochondrial adenine nucleotide translocator), member 4/5/6/31	http://www.genome.jp/dbget-bin/www_bget?ko:K05863	Q26365	1224	5.5e-133	ADP,ATP carrier protein OS=Drosophila melanogaster OX=7227 GN=sesB PE=2 SV=4	--	--	--	--	--	--	--	--	KOG0749	Mitochondrial ADP/ATP carrier proteins	UP	9.5956	2.56e-11	blast,frame:1 start:385 end:1332
Cluster-41647.19948	181	2212	2413	4	5	0	6.89	83.32	91.45	0.15	0.19	0	1153	112253391	ABI14283.1	644	1.8e-64	cyclophilin-like protein [Pfiesteria piscicida]	XM_020749615.1	XM_020749615	107	4.39e-46	PREDICTED: Orbicella faveolata peptidyl-prolyl cis-trans isomerase-like (LOC110044094), mRNA	-	-	-	http://www.genome.jp/dbget-bin/www_bget?ko:-	P30405	636	5.7e-65	Peptidyl-prolyl cis-trans isomerase F, mitochondrial OS=Homo sapiens OX=9606 GN=PPIF PE=1 SV=1	PF00160	Cyclophilin type peptidyl-prolyl cis-trans isomerase/CLD	GO:0000413	protein peptidyl-prolyl isomerization	GO:0003755	peptidyl-prolyl cis-trans isomerase activity	--	--	KOG0865	Cyclophilin type peptidyl-prolyl cis-trans isomerase	UP	9.0505	2.65e-11	blast,frame:3 start:297 end:962
Cluster-41647.32066	168.78	347.73	313.29	16.99	6	14.73	6.61	13.47	12.21	0.64	0.24	0.58	1128	1109281758	XP_019165208.1	471	2e-44	PREDICTED: NAC domain-containing protein 35 [Ipomoea nil]	XM_021986028.1	XM_021986028	45	1.25e-11	PREDICTED: Spinacia oleracea NAC domain-containing protein 43-like (LOC110781984), mRNA	-	-	-	http://www.genome.jp/dbget-bin/www_bget?ko:-	Q10S65	430	4.3e-41	NAC domain-containing protein 22 OS=Oryza sativa subsp. japonica OX=39947 GN=NAC022 PE=2 SV=1	PF02365	No apical meristem (NAM) protein	GO:0006355	regulation of transcription, DNA-templated	GO:0003677	DNA binding	--	--	--	--	UP	4.3725	2.65e-11	blast,frame:-3 start:1093 end:263
Cluster-41647.15755	182	1493	1847	6	3	0	2.96	24.43	30.27	0.1	0.05	0	2344	902550499	AKR76260.1	2058	3.9e-228	beta-1 tubulin [Dendrobium catenatum]	XM_009031280.1	XM_009031280	472	0	Helobdella robusta hypothetical protein mRNA	K07375	TUBB	tubulin beta	http://www.genome.jp/dbget-bin/www_bget?ko:K07375	Q3MHM5	2086	8.4e-233	Tubulin beta-4B chain OS=Bos taurus OX=9913 GN=TUBB4B PE=2 SV=1	PF00091	Tubulin/FtsZ family, GTPase domain	--	--	GO:0003924	GTPase activity	--	--	KOG1375	Beta tubulin	UP	8.6356	3.06e-11	blast,frame:-2 start:1677 end:325
Cluster-41647.30329	165	275	659	0	0	0	1.84	3.09	7.41	0	0	0	3304	--	--	--	--	--	--	--	--	--	--	--	--	--	--	--	--	--	--	PF06466//PF00997	PCAF (P300/CBP-associated factor) N-terminal domain//Kappa casein	GO:0006355//GO:0042967	regulation of transcription, DNA-templated//obsolete acyl-carrier-protein biosynthetic process	GO:0004402	histone acetyltransferase activity	GO:0005576//GO:0005634//GO:0000123	extracellular region//nucleus//histone acetyltransferase complex	--	--	UP	10.892	3.18e-11	estscan,start:3304 end:171; minus strand
Cluster-41647.23952	194.01	308.55	184.68	23.36	8	15	28.61	41.8	25.71	3.1	1.11	2.08	491	586749682	XP_006851414.1	625	1.2e-62	probable mannitol dehydrogenase [Amborella trichopoda]	XM_009611281.2	XM_009611281	49	3.13e-14	PREDICTED: Nicotiana tomentosiformis 8-hydroxygeraniol dehydrogenase-like (LOC104103376), transcript variant X2, mRNA	K00083	E1.1.1.195	cinnamyl-alcohol dehydrogenase	http://www.genome.jp/dbget-bin/www_bget?ko:K00083	O82515	584	2.6e-59	Probable mannitol dehydrogenase OS=Medicago sativa OX=3879 GN=CAD1 PE=1 SV=1	PF02826//PF00107	D-isomer specific 2-hydroxyacid dehydrogenase, NAD binding domain//Zinc-binding dehydrogenase	GO:0055114	oxidation-reduction process	GO:0051287	NAD binding	--	--	--	--	UP	3.8406	3.22e-11	estscan,start:1 end:491
Cluster-41647.32541	130.94	500	721.65	0	0	0	1.27	4.9	7.07	0	0	0	3757	--	--	--	--	--	--	--	--	--	--	--	--	--	--	Q32PY2	314	4e-27	Lipase member H OS=Rattus norvegicus OX=10116 GN=Liph PE=2 SV=1	PF00487	Fatty acid desaturase	GO:0006629	lipid metabolic process	--	--	--	--	--	--	UP	11.187	3.24e-11	blast,frame:2 start:347 end:3589
Cluster-41647.33494	90.98	68.18	97	1699.2	1102.81	3718.46	3.57	2.65	3.79	64.38	43.37	145.69	1126	--	--	--	--	--	--	--	--	--	--	--	--	--	--	--	--	--	--	--	--	--	--	--	--	--	--	--	--	DOWN	-4.825	3.27e-11	--
Cluster-41647.7428	125	1077	1144	2	3	0	3.01	25.9	27.6	0.05	0.07	0	1671	1025192224	XP_016475441.1	164	1.2e-08	PREDICTED: glycine-rich RNA-binding protein 2, mitochondrial-like [Nicotiana tabacum]	--	--	--	--	--	-	-	-	http://www.genome.jp/dbget-bin/www_bget?ko:-	B3NGA1	248	8.1e-20	Protein alan shepard OS=Drosophila erecta OX=7220 GN=shep PE=3 SV=1	PF03341//PF00076	Poxvirus mRNA capping enzyme, small subunit//RNA recognition motif. (a.k.a. RRM, RBD, or RNP domain)	GO:0009451//GO:0006370	RNA modification//7-methylguanosine mRNA capping	GO:0004482//GO:0003676	mRNA (guanine-N7-)-methyltransferase activity//nucleic acid binding	--	--	KOG4733	FOG: RRM domain	UP	8.8425	3.27e-11	blast,frame:3 start:1191 end:1571|blast,frame:1 start:685 end:1206
Cluster-41647.17210	128	1092	1532	2	3	0	6.16	51.63	73.03	0.09	0.14	0	967	384245616	EIE19109.1	786	5e-81	60S ribosomal protein L7 [Coccomyxa subellipsoidea C-169]	--	--	--	--	--	K02937	RP-L7e, RPL7	large subunit ribosomal protein L7e	http://www.genome.jp/dbget-bin/www_bget?ko:K02937	O01802	790	6.6e-83	60S ribosomal protein L7 OS=Caenorhabditis elegans OX=6239 GN=rpl-7 PE=3 SV=1	--	--	--	--	--	--	--	--	KOG3184	60S ribosomal protein L7	UP	9.0783	3.64e-11	blast,frame:3 start:156 end:896
Cluster-41647.9394	153	1095	1905.84	2	4	0	11.13	76.83	135.51	0.14	0.29	0	729	--	--	--	--	--	--	--	--	--	--	--	--	--	--	--	--	--	--	PF10717	Occlusion-derived virus envelope protein ODV-E18	--	--	--	--	GO:0019031	viral envelope	--	--	UP	9.0103	4.29e-11	estscan,start:729 end:1; minus strand
Cluster-27851.0	110	227	238	3	5	0	8.32	16.53	17.57	0.21	0.37	0	711	--	--	--	--	--	--	--	--	--	--	--	--	--	--	--	--	--	--	--	--	--	--	--	--	--	--	--	--	UP	6.1259	4.99e-11	--
Cluster-41647.7666	129	938	1344	1	2	0	2.46	17.94	25.76	0.02	0.04	0	2040	6012952	CAB57309.1	321	8.9e-27	60S ribosomal protein L6 (YL 16 like) [Cyanophora paradoxa]	--	--	--	--	--	K02934	RP-L6e, RPL6	large subunit ribosomal protein L6e	http://www.genome.jp/dbget-bin/www_bget?ko:K02934	Q2YGT9	407	3.6e-38	60S ribosomal protein L6 OS=Sus scrofa OX=9823 GN=RPL6 PE=1 SV=3	PF01159//PF03832	Ribosomal protein L6e//WSK motif	GO:0006412//GO:0042254//GO:0006605//GO:0007165	translation//ribosome biogenesis//protein targeting//signal transduction	GO:0003735	structural constituent of ribosome	GO:0005840	ribosome	KOG1694	60s ribosomal protein L6	UP	9.6084	5.25e-11	blast,frame:2 start:218 end:1201
Cluster-41647.6340	303	308	1246.98	9	10	12	10.09	10.19	41.46	0.29	0.33	0.4	1280	1269978217	XP_022739823.1	205	1.6e-13	probable WRKY transcription factor 51 [Durio zibethinus]	--	--	--	--	--	-	-	-	http://www.genome.jp/dbget-bin/www_bget?ko:-	Q9S763	169	8.9e-11	Probable WRKY transcription factor 45 OS=Arabidopsis thaliana OX=3702 GN=WRKY45 PE=1 SV=1	PF03106	WRKY DNA -binding domain	GO:0006355	regulation of transcription, DNA-templated	GO:0043565//GO:0003700	sequence-specific DNA binding//DNA-binding transcription factor activity	GO:0005667	transcription regulator complex	--	--	UP	5.819	5.76e-11	blast,frame:-1 start:491 end:255|blast,frame:-3 start:1092 end:532
Cluster-41647.9245	261	181	1512	3	2	2	14.89	10.08	85.04	0.16	0.11	0.11	857	294464839	ADE77925.1	377	1.2e-33	unknown [Picea sitchensis]	CP046445.1	CP046445	35	3.42e-06	Leclercia sp. 119287 chromosome, complete genome	-	-	-	http://www.genome.jp/dbget-bin/www_bget?ko:-	Q3E6P4	297	8.6e-26	F-box protein At2g02240 OS=Arabidopsis thaliana OX=3702 GN=At2g02240 PE=2 SV=1	--	--	--	--	--	--	--	--	--	--	UP	8.0839	5.9e-11	blast,frame:2 start:191 end:856
Cluster-41647.13001	534	531	441.01	159	158	123	8.97	8.97	7.46	2.62	2.7	2.09	2278	1333454945	PNR28785.1	448	1.9e-41	hypothetical protein PHYPA_027477 [Physcomitrella patens]	--	--	--	--	--	-	-	-	http://www.genome.jp/dbget-bin/www_bget?ko:-	O82500	135	1.4e-06	Putative disease resistance protein At4g11170 OS=Arabidopsis thaliana OX=3702 GN=At4g11170 PE=2 SV=1	PF00931//PF02367//PF03266//PF01637//PF00910//PF00448//PF00004	NB-ARC domain//Threonylcarbamoyl adenosine biosynthesis protein TsaE//NTPase//ATPase domain predominantly from Archaea//RNA helicase//SRP54-type protein, GTPase domain//ATPase family associated with various cellular activities (AAA)	GO:0002949//GO:0006614	tRNA threonylcarbamoyladenosine modification//SRP-dependent cotranslational protein targeting to membrane	GO:0043531//GO:0005525//GO:0003724//GO:0003723//GO:0098519//GO:0005524	ADP binding//GTP binding//RNA helicase activity//RNA binding//nucleotide phosphatase activity, acting on free nucleotides//ATP binding	--	--	--	--	UP	1.7023	6.75e-11	blast,frame:-1 start:1882 end:374
Cluster-41647.29803	110.95	1107.01	1057	0	0	0	1.17	11.83	11.29	0	0	0	3464	1026759753	OAE21596.1	1547	1e-168	hypothetical protein AXG93_939s1020 [Marchantia polymorpha subsp. ruderalis]	XM_002426658.1	XM_002426658	408	0	Pediculus humanus corporis retinoblastoma-binding protein, putative, mRNA	K10752	RBBP4, HAT2, CAF1, MIS16	histone-binding protein RBBP4	http://www.genome.jp/dbget-bin/www_bget?ko:K10752	Q3MHL3	2020	5.6e-225	Histone-binding protein RBBP4 OS=Bos taurus OX=9913 GN=RBBP4 PE=1 SV=3	PF12861//PF00097//PF01080//PF04499//PF04814//PF05053//PF12678//PF00400//PF12906//PF00937//PF14867	Anaphase-promoting complex subunit 11 RING-H2 finger//Zinc finger, C3HC4 type (RING finger)//Presenilin//SIT4 phosphatase-associated protein//Hepatocyte nuclear factor 1 (HNF-1), N terminus//Menin//RING-H2 zinc finger domain//WD domain, G-beta repeat//RING-variant domain//Coronavirus nucleocapsid//Lantibiotic alpha	GO:0016567//GO:0016485//GO:0045893//GO:0050830//GO:0043666	protein ubiquitination//protein processing//positive regulation of transcription, DNA-templated//defense response to Gram-positive bacterium//regulation of phosphoprotein phosphatase activity	GO:0019903//GO:0046872//GO:0004842//GO:0004190//GO:0005515//GO:0008270	protein phosphatase binding//metal ion binding//ubiquitin-protein transferase activity//aspartic-type endopeptidase activity//protein binding//zinc ion binding	GO:0005680//GO:0016021//GO:0019013//GO:0005634	anaphase-promoting complex//integral component of membrane//viral nucleocapsid//nucleus	KOG0264	Nucleosome remodeling factor, subunit CAF1/NURF55/MSI1	UP	11.931	6.75e-11	blast,frame:-1 start:3035 end:1731
Cluster-41647.10508	210	331	709	12	17	14	12.34	18.95	41.02	0.67	0.99	0.81	840	294460423	ADE75790.1	527	4.7e-51	unknown [Picea sitchensis]	--	--	--	--	--	K13448	CML	calcium-binding protein CML	http://www.genome.jp/dbget-bin/www_bget?ko:K13448	O22845	231	3.8e-18	Calmodulin-like protein 5 OS=Arabidopsis thaliana OX=3702 GN=CML5 PE=2 SV=2	PF13405//PF00036//PF13499//PF13202//PF10591	EF-hand domain//EF hand//EF-hand domain pair//EF hand//Secreted protein acidic and rich in cysteine Ca binding region	--	--	GO:0005509	calcium ion binding	--	--	--	--	UP	4.7785	6.75e-11	blast,frame:3 start:3 end:758
Cluster-41647.31284	215	1952	2262	4	7	0	6.65	60.12	70	0.12	0.22	0	1357	--	--	--	--	--	--	--	--	--	--	--	--	--	--	--	--	--	--	--	--	--	--	--	--	--	--	--	--	UP	8.6338	7.25e-11	estscan,start:1123 end:441; minus strand
Cluster-41647.33272	373	360	1308	10	18	15	11.15	10.71	39.1	0.29	0.54	0.45	1396	1096242228	APA32587.1	794	8.6e-82	arogenate dehydratase [Pinus pinaster]	--	--	--	--	--	K05359	ADT, PDT	arogenate/prephenate dehydratase [EC:4.2.1.91 4.2.1.51]	http://www.genome.jp/dbget-bin/www_bget?ko:K05359	Q9SSE7	533	6e-53	Arogenate dehydratase/prephenate dehydratase 2, chloroplastic OS=Arabidopsis thaliana OX=3702 GN=ADT2 PE=1 SV=1	PF00800	Prephenate dehydratase	GO:0009094//GO:0006571//GO:0000162	L-phenylalanine biosynthetic process//tyrosine biosynthetic process//tryptophan biosynthetic process	GO:0004664	prephenate dehydratase activity	--	--	KOG2797	Prephenate dehydratase	UP	5.4768	7.54e-11	blast,frame:1 start:16 end:1209
Cluster-41647.4535	225	534	1239	0	1	0	4.12	9.84	22.87	0	0.02	0	2109	--	--	--	--	--	--	--	--	--	--	--	--	--	--	--	--	--	--	PF07415	Gammaherpesvirus latent membrane protein (LMP2) protein	GO:0019042	viral latency	--	--	GO:0033644	host cell membrane	--	--	UP	10.793	8.67e-11	estscan,start:733 end:1824
Cluster-24419.0	189	343	603	10	8	16	7.27	13.05	23.08	0.37	0.31	0.61	1144	--	--	--	--	--	--	--	--	--	--	--	--	--	--	--	--	--	--	--	--	--	--	--	--	--	--	--	--	UP	4.9547	8.82e-11	estscan,start:317 end:45; minus strand
Cluster-41647.31744	217	2363.02	2099	1	6	0	3.9	42.73	38.03	0.02	0.11	0	2144	474271688	EMS60936.1	410	4.5e-37	Histone H4 [Triticum urartu]	XM_013560594.1	XM_013560594	190	6.01e-92	PREDICTED: Lingula anatina histone H4 (LOC106177733), mRNA	K11254	H4	histone H4	http://www.genome.jp/dbget-bin/www_bget?ko:K11254	P62795	410	1.7e-38	Histone H4 OS=Platynereis dumerilii OX=6359 PE=3 SV=2	PF02984//PF00125//PF15630//PF09726//PF02969//PF02291//PF02166	Cyclin, C-terminal domain//Core histone H2A/H2B/H3/H4//CENP-S protein//Macoilin family//TATA box binding protein associated factor (TAF)//Transcription initiation factor IID, 31kD subunit//Androgen receptor	GO:0006352//GO:0030521//GO:0006355//GO:0023041//GO:0007165	DNA-templated transcription, initiation//androgen receptor signaling pathway//regulation of transcription, DNA-templated//neuronal signal transduction//signal transduction	GO:0004879//GO:0003677//GO:0005496	nuclear receptor activity//DNA binding//steroid binding	GO:0042025//GO:0005634//GO:0071821//GO:0030867//GO:0000786	host cell nucleus//nucleus//FANCM-MHF complex//rough endoplasmic reticulum membrane//nucleosome	KOG3467	Histone H4	UP	9.3238	8.92e-11	blast,frame:-3 start:1950 end:1630
Cluster-41647.33103	107	972.61	1159	3	2	0	0.33	3.05	3.63	0.01	0.01	0	11221	485648077	EOD41045.1	589	4.1e-57	hypothetical protein EMIHUDRAFT_108224 [Emiliania huxleyi CCMP1516]	--	--	--	--	--	-	-	-	http://www.genome.jp/dbget-bin/www_bget?ko:-	Q6IRB8	1192	1.9e-128	Lysine-specific demethylase 3A-A OS=Xenopus laevis OX=8355 GN=kdm3a-a PE=2 SV=1	PF01363//PF01436//PF04057	FYVE zinc finger//NHL repeat//Replication factor-A protein 1, N-terminal domain	GO:0006260	DNA replication	GO:0005515//GO:0046872//GO:0003677	protein binding//metal ion binding//DNA binding	GO:0005634	nucleus	KOG1356	Putative transcription factor 5qNCA, contains JmjC domain	UP	8.8014	1.02e-10	blast,frame:3 start:1737 end:10832
Cluster-41647.7405	115	979	1572	2	1	0	2.11	18.06	29.06	0.04	0.02	0	2106	--	--	--	--	--	--	--	--	--	--	--	--	--	--	Q9JKW0	260	4.1e-21	ADP-ribosylation factor-like protein 6-interacting protein 1 OS=Mus musculus OX=10090 GN=Arl6ip1 PE=1 SV=1	PF05454//PF03547	Dystroglycan (Dystrophin-associated glycoprotein 1)//Membrane transport protein	GO:0007016//GO:0055085	obsolete cytoskeletal anchoring at plasma membrane//transmembrane transport	--	--	GO:0016021//GO:0016010	integral component of membrane//dystrophin-associated glycoprotein complex	--	--	UP	9.7878	1.05e-10	blast,frame:1 start:835 end:1485
Cluster-41647.23754	2953.78	5552.76	2504.61	331.14	103	191	109.46	203.82	92.48	11.86	3.83	7.07	1177	1248280825	ATG29908.1	1155	1e-123	CYP750C16 [Taxus chinensis]	--	--	--	--	--	K20562	CYP736A	biphenyl-4-hydroxylase	http://www.genome.jp/dbget-bin/www_bget?ko:K20562	A0A068Q5V6	748	6e-78	Cytochrome P450 71AU50 OS=Prunus mume OX=102107 GN=CYP71AU50 PE=2 SV=1	PF00067	Cytochrome P450	GO:0055114	oxidation-reduction process	GO:0016705//GO:0005506//GO:0020037	oxidoreductase activity, acting on paired donors, with incorporation or reduction of molecular oxygen//iron ion binding//heme binding	--	--	--	--	UP	4.0878	1.21e-10	blast,frame:1 start:1 end:987
Cluster-41647.19674	3345.27	5071.33	4245.92	690.25	248.03	283.28	78.8	119.55	100.4	15.87	5.92	6.73	1700	294462168	ADE76636.1	1429	2.5e-155	unknown [Picea sitchensis]	AK409483.1	AK409483	461	0	Cryptomeria japonica mRNA, clone: CFFL041_M18, expressed in female strobili	-	-	-	http://www.genome.jp/dbget-bin/www_bget?ko:-	Q6WUC2	867	1.4e-91	(R,S)-reticuline 7-O-methyltransferase OS=Papaver somniferum OX=3469 GN=7OMT PE=1 SV=1	PF09769//PF05891//PF00891//PF08100//PF08241	Apolipoprotein O//AdoMet dependent proline di-methyltransferase//O-methyltransferase domain//Dimerisation domain//Methyltransferase domain	GO:0042407//GO:0006480	cristae formation//N-terminal protein amino acid methylation	GO:0046983//GO:0008171//GO:0008168	protein dimerization activity//O-methyltransferase activity//methyltransferase activity	GO:0061617	MICOS complex	--	--	UP	3.3545	1.23e-10	blast,frame:2 start:188 end:1327
Cluster-41647.21631	225	592	577	33	13	21	1.95	5.2	5.07	0.28	0.12	0.19	4161	1098765585	XP_018845949.1	1743	2.3e-191	PREDICTED: LOW QUALITY PROTEIN: probable leucine-rich repeat receptor-like protein kinase At2g33170 [Juglans regia]	--	--	--	--	--	-	-	-	http://www.genome.jp/dbget-bin/www_bget?ko:-	Q9SHI2	1700	8.6e-188	Leucine-rich repeat receptor-like serine/threonine-protein kinase At1g17230 OS=Arabidopsis thaliana OX=3702 GN=At1g17230 PE=1 SV=2	PF00069//PF13855//PF07714//PF13516//PF00560	Protein kinase domain//Leucine rich repeat//Protein tyrosine and serine/threonine kinase//Leucine Rich repeat//Leucine Rich Repeat	GO:0006468	protein phosphorylation	GO:0005524//GO:0004672//GO:0005515	ATP binding//protein kinase activity//protein binding	--	--	--	--	UP	4.325	1.24e-10	estscan,start:4008 end:790; minus strand
Cluster-41647.6942	144	1432	1642	3	5	0	1.53	15.36	17.61	0.03	0.05	0	3452	388490654	AFK33393.1	810	3e-83	unknown [Lotus japonicus]	AY961563.1	AY961563	177	1.64e-84	Lysiphlebus testaceipes ribosomal protein S9 (RpS9) mRNA, complete cds	K02997	RP-S9e, RPS9	small subunit ribosomal protein S9e	http://www.genome.jp/dbget-bin/www_bget?ko:K02997	B4PEU8	813	5.1e-85	40S ribosomal protein S9 OS=Drosophila yakuba OX=7245 GN=RpS9 PE=2 SV=1	PF01479//PF00210//PF00076//PF02915//PF00163//PF16367	S4 domain//Ferritin-like domain//RNA recognition motif. (a.k.a. RRM, RBD, or RNP domain)//Rubrerythrin//Ribosomal protein S4/S9 N-terminal domain//RNA recognition motif	GO:0006879//GO:0055114	cellular iron ion homeostasis//oxidation-reduction process	GO:0003676//GO:0046872//GO:0016491//GO:0008199//GO:0019843//GO:0003723	nucleic acid binding//metal ion binding//oxidoreductase activity//ferric iron binding//rRNA binding//RNA binding	--	--	KOG3301	Ribosomal protein S4	UP	8.6289	1.26e-10	blast,frame:2 start:266 end:865
Cluster-41647.9736	210	1813	2346	5	7	0	5.92	50.97	66.22	0.14	0.2	0	1464	326507178	BAJ95666.1	1067	2e-113	predicted protein [Hordeum vulgare subsp. vulgare]	XR_001116633.2	XR_001116633	91	4.4e-37	PREDICTED: Nomascus leucogenys 14-3-3 protein theta pseudogene (LOC101177248), misc_RNA	K06630	YWHAE	14-3-3 protein epsilon	http://www.genome.jp/dbget-bin/www_bget?ko:K06630	Q2F637	1074	1.2e-115	14-3-3 protein zeta OS=Bombyx mori OX=7091 GN=14-3-3zeta PE=2 SV=2	PF02154	Flagellar motor switch protein FliM	GO:0071973	bacterial-type flagellum-dependent cell motility	GO:0003774	motor activity	GO:0009425	bacterial-type flagellum basal body	KOG0841	Multifunctional chaperone (14-3-3 family)	UP	8.5002	1.4e-10	blast,frame:1 start:301 end:1089
Cluster-41647.7259	107	1043.05	1448	2	3	0	2.95	28.64	39.92	0.05	0.08	0	1493	1360869753	PSC67815.1	1090	4.4e-116	Receptor of activated kinase C component of 40S small ribosomal subunit [Micractinium conductrix]	XM_030675724.1	XM_030675724	326	1.04e-167	PREDICTED: Rhodamnia argentea guanine nucleotide-binding protein subunit beta-like protein (LOC115741729), mRNA	K14753	RACK1	guanine nucleotide-binding protein subunit beta-2-like 1 protein	http://www.genome.jp/dbget-bin/www_bget?ko:K14753	O18640	1246	1.4e-135	Guanine nucleotide-binding protein subunit beta-like protein OS=Drosophila melanogaster OX=7227 GN=Rack1 PE=1 SV=2	PF00400//PF04762	WD domain, G-beta repeat//IKI3 family	GO:0002098	tRNA wobble uridine modification	GO:0005515	protein binding	GO:0033588	Elongator holoenzyme complex	KOG0279	G protein beta subunit-like protein	UP	8.9961	1.44e-10	blast,frame:-1 start:1283 end:267
Cluster-41647.10274	55	7916.76	6646.39	0	0	0	1.56	223.47	188.38	0	0	0	1459	--	--	--	--	--	--	--	--	--	--	--	--	--	--	--	--	--	--	--	--	--	--	--	--	--	--	--	--	UP	14.613	1.44e-10	estscan,start:1 end:779
Cluster-41647.32074	22.42	8.09	4.62	1049	240	1130	0.17	0.06	0.04	8.04	1.91	8.92	4624	1129207299	OLQ09244.1	334	6.3e-28	CMP-sialic acid transporter 5 [Symbiodinium microadriaticum]	--	--	--	--	--	--	--	--	--	Q8B0U2	2428	3.7e-272	RNA-directed RNA polymerase L OS=Lettuce big-vein associated virus (isolate Japan/Kagawa) OX=652962 GN=L PE=3 SV=1	PF00946	Mononegavirales RNA dependent RNA polymerase	GO:0009451//GO:0006370//GO:0006144	RNA modification//7-methylguanosine mRNA capping//purine nucleobase metabolic process	GO:0005524//GO:0004482//GO:0003968	ATP binding//mRNA (guanine-N7-)-methyltransferase activity//RNA-directed 5'-3' RNA polymerase activity	GO:0031379	RNA-directed RNA polymerase complex	--	--	DOWN	-6.2143	1.46e-10	blast,frame:1 start:1 end:4623
Cluster-41647.18466	925.41	1762.04	1644.61	201	109.42	68.03	19.85	37.88	35.45	4.22	2.38	1.47	1841	1557855885	RWR81234.1	564	5.3e-55	cationic peroxidase 1-like protein [Cinnamomum micranthum f. kanehirae]	AK411979.1	AK411979	97	2.57e-40	Cryptomeria japonica mRNA, clone: CLFL048_A09, expressed in needles	K00430	E1.11.1.7	peroxidase	http://www.genome.jp/dbget-bin/www_bget?ko:K00430	A7NY33	509	4.8e-50	Peroxidase 4 OS=Vitis vinifera OX=29760 GN=GSVIVT00023967001 PE=1 SV=1	PF00141	Peroxidase	GO:0006804//GO:0055114//GO:0006979	obsolete peroxidase reaction//oxidation-reduction process//response to oxidative stress	GO:0004601//GO:0020037	peroxidase activity//heme binding	--	--	--	--	UP	3.5036	1.5e-10	blast,frame:-3 start:1575 end:1129|blast,frame:-2 start:721 end:149
Cluster-41647.11910	110	868	1158	1	2	0	0.89	7.14	9.53	0.01	0.02	0	4425	--	--	--	--	--	--	--	--	--	--	--	--	--	--	P14599	500	1.3e-48	Amyloid-beta-like protein OS=Drosophila melanogaster OX=7227 GN=Appl PE=1 SV=2	PF04996//PF02177//PF01066//PF12924	Succinylarginine dihydrolase//Amyloid A4 N-terminal heparin-binding//CDP-alcohol phosphatidyltransferase//Copper-binding of amyloid precursor, CuBD	GO:0006525//GO:0008654	arginine metabolic process//phospholipid biosynthetic process	GO:0016780//GO:0008201//GO:0046914//GO:0009015	phosphotransferase activity, for other substituted phosphate groups//heparin binding//transition metal ion binding//N-succinylarginine dihydrolase activity	GO:0016020	membrane	KOG3540	Beta amyloid precursor protein	UP	9.4329	1.5e-10	blast,frame:2 start:1541 end:3955
Cluster-41647.8136	107	965	1984.9	0	0	0	5.02	44.53	92.32	0	0	0	985	--	--	--	--	--	--	--	--	--	--	--	--	--	--	--	--	--	--	--	--	--	--	--	--	--	--	--	--	UP	12.368	1.51e-10	estscan,start:222 end:830
Cluster-41647.18564	6946	12940.7	11025.5	943.15	254	570	108.82	204.11	174.14	14.51	4.05	9.04	2423	821092550	AKH04261.1	1712	5.3e-188	putative hydroxylase [Taxus baccata]	KP178206.1	KP178206	700	0	Taxus baccata putative hydroxylase mRNA, complete cds	-	-	-	http://www.genome.jp/dbget-bin/www_bget?ko:-	Q50EK0	806	2.3e-84	Cytochrome P450 716B2 OS=Picea sitchensis OX=3332 GN=CYP716B2 PE=2 SV=1	PF00601//PF00067	Influenza non-structural protein (NS2)//Cytochrome P450	GO:0055114//GO:0006405	oxidation-reduction process//RNA export from nucleus	GO:0020037//GO:0005506//GO:0016705	heme binding//iron ion binding//oxidoreductase activity, acting on paired donors, with incorporation or reduction of molecular oxygen	GO:0042025	host cell nucleus	--	--	UP	4.0814	1.53e-10	blast,frame:-1 start:704 end:330|blast,frame:-2 start:2212 end:890
Cluster-41647.1607	12.16	5.38	6.16	133.01	180.2	264.78	1.05	0.44	0.52	10.76	15.16	22.26	654	--	--	--	--	--	--	--	--	--	--	--	--	--	--	--	--	--	--	PF05773	RWD domain	--	--	GO:0005515	protein binding	--	--	--	--	DOWN	-4.7885	1.53e-10	--
Cluster-41647.7193	152	1410	2063	4	5	0	3.84	35.6	52.27	0.1	0.13	0	1603	326493892	BAJ85408.1	1146	1.5e-122	predicted protein [Hordeum vulgare subsp. vulgare]	LR000248.1	LR000248	123	7.86e-55	Eubosmina coregoni mRNA for EOG090X0822 (EOG090X0822 gene), isolate FI-BAL1-1	K02930	RP-L4e, RPL4	large subunit ribosomal protein L4e	http://www.genome.jp/dbget-bin/www_bget?ko:K02930	Q9D8E6	1169	1.2e-126	60S ribosomal protein L4 OS=Mus musculus OX=10090 GN=Rpl4 PE=1 SV=3	PF00573	Ribosomal protein L4/L1 family	GO:0006412//GO:0042254	translation//ribosome biogenesis	GO:0003735	structural constituent of ribosome	GO:0005840	ribosome	KOG1475	Ribosomal protein RPL1/RPL2/RL4L4	UP	8.6475	1.53e-10	blast,frame:-1 start:1297 end:95
Cluster-41647.20429	1085	1743	1813	159	125	42	13.65	22.13	23.03	1.97	1.6	0.54	2953	1173211844	BAX09107.1	832	7.2e-86	protein kinase [Cryptomeria japonica]	--	--	--	--	--	-	-	-	http://www.genome.jp/dbget-bin/www_bget?ko:-	Q9LMB9	366	3e-33	Cysteine-rich receptor-like protein kinase 1 OS=Arabidopsis thaliana OX=3702 GN=CRK1 PE=2 SV=2	PF16685//PF00069//PF07714	zinc RING finger of MSL2//Protein kinase domain//Protein tyrosine and serine/threonine kinase	GO:0006468	protein phosphorylation	GO:0004672//GO:0005524//GO:0061630	protein kinase activity//ATP binding//ubiquitin protein ligase activity	--	--	--	--	UP	3.8205	1.56e-10	estscan,start:2045 end:2953
Cluster-41647.8371	98	661	737	0	0	0	0.44	3.05	3.39	0	0	0	7716	--	--	--	--	--	XM_027466394.1	XM_027466394	59	1.45e-18	PREDICTED: Anas platyrhynchos zinc finger homeobox 3 (ZFHX3), partial mRNA	--	--	--	--	P28167	393	5.7e-36	Zinc finger protein 2 OS=Drosophila melanogaster OX=7227 GN=zfh2 PE=1 SV=2	PF05434//PF15202//PF00957//PF11837//PF06152//PF05920//PF00046//PF00096	TMEM9//Adipogenin//Synaptobrevin//Domain of unknown function (DUF3357)//Phage minor capsid protein 2//Homeobox KN domain//Homeodomain//Zinc finger, C2H2 type	GO:0045444//GO:0005985//GO:0016192//GO:0006012//GO:0006355//GO:0005982	fat cell differentiation//sucrose metabolic process//vesicle-mediated transport//galactose metabolic process//regulation of transcription, DNA-templated//starch metabolic process	GO:0003677//GO:0005198//GO:0004575//GO:0003676//GO:0004564	DNA binding//structural molecule activity//sucrose alpha-glucosidase activity//nucleic acid binding//beta-fructofuranosidase activity	GO:0017177//GO:0016021	glucosidase II complex//integral component of membrane	KOG1146	Homeobox protein	UP	11.328	1.58e-10	blast,frame:-1 start:7716 end:2758
Cluster-41647.1523	45	57	47	314	425	218	2.82	3.47	2.89	18.68	26.27	13.44	804	116783599	ABK23014.1	567	1e-55	unknown [Picea sitchensis]	--	--	--	--	--	-	-	-	http://www.genome.jp/dbget-bin/www_bget?ko:-	Q67YE6	432	1.8e-41	Zinc finger AN1 domain-containing stress-associated protein 12 OS=Arabidopsis thaliana OX=3702 GN=SAP12 PE=2 SV=2	PF05699//PF04539//PF01428	hAT family C-terminal dimerisation region//Sigma-70 region 3//AN1-like Zinc finger	GO:0006352//GO:0006355	DNA-templated transcription, initiation//regulation of transcription, DNA-templated	GO:0008270//GO:0046983//GO:0003700	zinc ion binding//protein dimerization activity//DNA-binding transcription factor activity	GO:0005667	transcription regulator complex	KOG3183	Predicted Zn-finger protein	DOWN	-2.7513	1.62e-10	blast,frame:1 start:121 end:678
Cluster-46644.0	115	1492	1622	4	1	0	2.36	30.7	33.45	0.08	0.02	0	1913	1040824554	XP_017216437.1	282	2.8e-22	PREDICTED: GDSL esterase/lipase At5g45920 [Daucus carota subsp. sativus]	--	--	--	--	--	-	-	-	http://www.genome.jp/dbget-bin/www_bget?ko:-	Q2TAA2	307	1.3e-26	Isoamyl acetate-hydrolyzing esterase 1 homolog OS=Homo sapiens OX=9606 GN=IAH1 PE=1 SV=1	PF00657	GDSL-like Lipase/Acylhydrolase	--	--	GO:0016788	hydrolase activity, acting on ester bonds	--	--	KOG3035	Isoamyl acetate-hydrolyzing esterase	UP	9.3599	1.63e-10	blast,frame:-3 start:1518 end:304
Cluster-41647.19342	1122.89	1776.34	1909.18	248.15	167.26	85.57	23.55	37.35	40.25	5.09	3.56	1.81	1877	1248280935	ATG29963.1	1780	5.4e-196	CYP94D83 [Taxus chinensis]	--	--	--	--	--	-	-	-	http://www.genome.jp/dbget-bin/www_bget?ko:-	P98188	1130	4.8e-122	Cytochrome P450 94A2 OS=Vicia sativa OX=3908 GN=CYP94A2 PE=2 SV=1	PF00067	Cytochrome P450	GO:0055114	oxidation-reduction process	GO:0020037//GO:0005506//GO:0016705	heme binding//iron ion binding//oxidoreductase activity, acting on paired donors, with incorporation or reduction of molecular oxygen	--	--	--	--	UP	3.2438	1.63e-10	blast,frame:2 start:2 end:1657
Cluster-41647.10088	93	1207.69	1105.83	0	0	0	0.48	6.29	5.75	0	0	0	6855	2130615	AAB58342.1	296	2.4e-23	sex-determining region Y protein, partial [Carica papaya]	XM_021065785.1	XM_021065785	105	3.47e-44	PREDICTED: Sus scrofa SRY-box 21 (SOX21), mRNA	K09272	SSRP1	structure-specific recognition protein 1	http://www.genome.jp/dbget-bin/www_bget?ko:K09272	Q80TB7	702	7.5e-72	Zinc finger SWIM domain-containing protein 6 OS=Mus musculus OX=10090 GN=Zswim6 PE=1 SV=3	PF12336//PF10541	SOX transcription factor//Nuclear envelope localisation domain	GO:0006355	regulation of transcription, DNA-templated	--	--	GO:0016021	integral component of membrane	--	--	UP	12.012	1.63e-10	blast,frame:3 start:417 end:6509
Cluster-41647.14992	995	1235	1201.99	382	351	239	8.55	10.75	10.46	3.24	3.09	2.09	4199	720099241	XP_010247878.1	1724	3.8e-189	PREDICTED: G-type lectin S-receptor-like serine/threonine-protein kinase At2g19130 [Nelumbo nucifera]	--	--	--	--	--	-	-	-	http://www.genome.jp/dbget-bin/www_bget?ko:-	O64477	1613	1.1e-177	G-type lectin S-receptor-like serine/threonine-protein kinase At2g19130 OS=Arabidopsis thaliana OX=3702 GN=At2g19130 PE=2 SV=1	PF00069//PF02854//PF07714//PF09204//PF00954	Protein kinase domain//MIF4G domain//Protein tyrosine and serine/threonine kinase//Bacterial self-protective colicin-like immunity//S-locus glycoprotein domain	GO:0030153//GO:0048544//GO:0006468//GO:0006955	bacteriocin immunity//recognition of pollen//protein phosphorylation//immune response	GO:0003723//GO:0005515//GO:0004672//GO:0005524//GO:0015643	RNA binding//protein binding//protein kinase activity//ATP binding//toxic substance binding	GO:0019814	immunoglobulin complex	--	--	UP	1.762	1.88e-10	blast,frame:-3 start:2943 end:496
Cluster-41647.18460	152	1089	1276	6	4	0	1.27	9.2	10.77	0.05	0.03	0	4319	1190950515	XP_020868367.1	1730	7.8e-190	protein argonaute 1 isoform X2 [Arabidopsis lyrata subsp. lyrata]	XM_030681871.1	XM_030681871	974	0	PREDICTED: Rhodamnia argentea protein argonaute-2-like (LOC115746163), mRNA	K11593	ELF2C, AGO	eukaryotic translation initiation factor 2C	http://www.genome.jp/dbget-bin/www_bget?ko:K11593	Q9UKV8	3238	0	Protein argonaute-2 OS=Homo sapiens OX=9606 GN=AGO2 PE=1 SV=3	PF02170//PF02171	PAZ domain//Piwi domain	--	--	GO:0003676//GO:0005515	nucleic acid binding//protein binding	--	--	KOG1041	Translation initiation factor 2C (eIF-2C) and related proteins	UP	7.9888	1.88e-10	blast,frame:-2 start:3775 end:1190
Cluster-41647.25235	661	733	625	154	77	57	18.39	20.34	17.41	4.17	2.16	1.59	1480	1226834175	XP_021866003.1	332	3.4e-28	uncharacterized protein LOC110804698 [Spinacia oleracea]	--	--	--	--	--	-	-	-	http://www.genome.jp/dbget-bin/www_bget?ko:-	--	--	--	--	PF10399	Ubiquitinol-cytochrome C reductase Fe-S subunit TAT signal	GO:0006118//GO:0006119//GO:0055114	obsolete electron transport//oxidative phosphorylation//oxidation-reduction process	GO:0008121	ubiquinol-cytochrome-c reductase activity	--	--	--	--	UP	2.7872	1.95e-10	blast,frame:2 start:467 end:1201
Cluster-41647.24580	101	1049	1422	1	2	0	0.44	4.67	6.32	0	0.01	0	7985	1377605849	GBG26612.1	629	6.7e-62	Alpha-actinin-1 [Hondaea fermentalgiana]	XM_018538000.1	XM_018538000	111	1.87e-47	PREDICTED: Cyphomyrmex costatus spectrin beta chain (LOC108772470), mRNA	K20478	GOLGB1	golgin subfamily B member 1	http://www.genome.jp/dbget-bin/www_bget?ko:K20478	Q00963	6841	0	Spectrin beta chain OS=Drosophila melanogaster OX=7227 GN=beta-Spec PE=1 SV=2	PF00307//PF00435	Calponin homology (CH) domain//Spectrin repeat	--	--	GO:0005515	protein binding	--	--	KOG0517	Beta-spectrin	UP	9.7028	2e-10	blast,frame:2 start:776 end:7825
Cluster-41647.17011	934	937.99	1299.99	295.98	208	178.97	71.43	69.04	97.03	21.3	15.56	13.37	706	383165579	AFG65673.1	171	7.6e-10	hypothetical protein 2_6183_01, partial [Pinus taeda]	--	--	--	--	--	K04733	IRAK4	interleukin-1 receptor-associated kinase 4	http://www.genome.jp/dbget-bin/www_bget?ko:K04733	Q9LDS6	144	3.9e-08	Putative cysteine-rich receptor-like protein kinase 32 OS=Arabidopsis thaliana OX=3702 GN=CRK32 PE=3 SV=1	PF03376	Adenovirus E3B protein	--	--	--	--	GO:0016020	membrane	--	--	UP	2.1655	2.07e-10	estscan,start:706 end:100; minus strand
Cluster-41647.2504	0	0	0	1492	2021	65	0	0	0	4.54	6.38	0.2	11273	1129207299	OLQ09244.1	373	4.6e-32	CMP-sialic acid transporter 5 [Symbiodinium microadriaticum]	--	--	--	--	--	-	-	-	http://www.genome.jp/dbget-bin/www_bget?ko:-	Q8B0U2	2746	0	RNA-directed RNA polymerase L OS=Lettuce big-vein associated virus (isolate Japan/Kagawa) OX=652962 GN=L PE=3 SV=1	PF02902//PF04265//PF00946	Ulp1 protease family, C-terminal catalytic domain//Thiamin pyrophosphokinase, vitamin B1 binding domain//Mononegavirales RNA dependent RNA polymerase	GO:0006144//GO:0006508//GO:0006370//GO:0009451//GO:0009229	purine nucleobase metabolic process//proteolysis//7-methylguanosine mRNA capping//RNA modification//thiamine diphosphate biosynthetic process	GO:0030975//GO:0008234//GO:0003968//GO:0005524//GO:0004482	thiamine binding//cysteine-type peptidase activity//RNA-directed 5'-3' RNA polymerase activity//ATP binding//mRNA (guanine-N7-)-methyltransferase activity	GO:0031379	RNA-directed RNA polymerase complex	--	--	DOWN	-12.66	2.27e-10	blast,frame:3 start:36 end:1217|blast,frame:1 start:4840 end:10980
Cluster-41647.23702	616	486	987	33	14.76	3	20.19	15.83	32.32	1.05	0.49	0.1	1296	116779004	ABK21095.1	1313	5.3e-142	unknown [Picea sitchensis]	XM_009410090.2	XM_009410090	198	1.28e-96	PREDICTED: Musa acuminata subsp. malaccensis probable xyloglucan endotransglucosylase/hydrolase (LOC103990820), mRNA	K08235	E2.4.1.207	xyloglucan:xyloglucosyl transferase	http://www.genome.jp/dbget-bin/www_bget?ko:K08235	Q41542	1198	4.3e-130	Probable xyloglucan endotransglucosylase/hydrolase OS=Triticum aestivum OX=4565 GN=XTH PE=2 SV=1	PF06955//PF00444//PF00722	Xyloglucan endo-transglycosylase (XET) C-terminus//Ribosomal protein L36//Glycosyl hydrolases family 16	GO:0006412//GO:0005975//GO:0042254//GO:0006073	translation//carbohydrate metabolic process//ribosome biogenesis//cellular glucan metabolic process	GO:0016762//GO:0003735//GO:0004553	xyloglucan:xyloglucosyl transferase activity//structural constituent of ribosome//hydrolase activity, hydrolyzing O-glycosyl compounds	GO:0048046//GO:0005618//GO:0005840	apoplast//cell wall//ribosome	--	--	UP	5.39	2.39e-10	blast,frame:-3 start:1285 end:377
Cluster-41647.7061	115	1083	1534	4	1	0	1.68	15.95	22.62	0.06	0.01	0	2578	1343985472	XP_023874610.1	731	3.2e-74	40S ribosomal protein S6-B-like [Quercus suber]	LL999049.1	LL999049	66	6.18e-23	Strongyloides stercoralis genome assembly S_stercoralis_PV0001 ,scaffold SSTP_scaffold0000002	K02991	RP-S6e, RPS6	small subunit ribosomal protein S6e	http://www.genome.jp/dbget-bin/www_bget?ko:K02991	Q90YR8	820	5.9e-86	40S ribosomal protein S6 OS=Ictalurus punctatus OX=7998 GN=rps6 PE=2 SV=1	PF04670//PF00071//PF00503//PF01926//PF10662//PF02072//PF03205//PF01092//PF00025//PF01637//PF02421//PF00009//PF15141	Gtr1/RagA G protein conserved region//Ras family//G-protein alpha subunit//50S ribosome-binding GTPase//Ethanolamine utilisation - propanediol utilisation//Prepro-orexin//Molybdopterin guanine dinucleotide synthesis protein B//Ribosomal protein S6e//ADP-ribosylation factor family//ATPase domain predominantly from Archaea//Ferrous iron transport protein B//Elongation factor Tu GTP binding domain//…	GO:0006576//GO:0006777//GO:0007218//GO:0042254//GO:0007186//GO:0007631//GO:0034551//GO:0006412	cellular biogenic amine metabolic process//Mo-molybdopterin cofactor biosynthetic process//neuropeptide signaling pathway//ribosome biogenesis//G protein-coupled receptor signaling pathway//feeding behavior//mitochondrial respiratory chain complex III assembly//translation	GO:0019001//GO:0003924//GO:0005524//GO:0003735//GO:0031683//GO:0005525	guanyl nucleotide binding//GTPase activity//ATP binding//structural constituent of ribosome//G-protein beta/gamma-subunit complex binding//GTP binding	GO:0005840	ribosome	KOG1646	40S ribosomal protein S6	UP	9.1207	2.41e-10	blast,frame:-3 start:2297 end:1533
Cluster-41647.9533	144	1410	2036	6	3	0	3.04	29.83	43.19	0.12	0.06	0	1867	428183934	EKX52790.1	1711	5.4e-188	hypothetical protein GUITHDRAFT_64866 [Guillardia theta CCMP2712]	MH990591.1	MH990591	495	0	Tetranychus truncatus clone 156 putative F0F1-type ATP synthase beta subunit mRNA, complete cds	K02133	ATPeF1B, ATP5B, ATP2	F-type H+-transporting ATPase subunit beta	http://www.genome.jp/dbget-bin/www_bget?ko:K02133	Q05825	1899	3.2e-211	ATP synthase subunit beta, mitochondrial OS=Drosophila melanogaster OX=7227 GN=ATPsynbeta PE=1 SV=3	PF00006//PF00005//PF06638//PF02874//PF00931//PF01637//PF00004//PF03193	ATP synthase alpha/beta family, nucleotide-binding domain//ABC transporter//Strabismus protein//ATP synthase alpha/beta family, beta-barrel domain//NB-ARC domain//ATPase domain predominantly from Archaea//ATPase family associated with various cellular activities (AAA)//RsgA GTPase	GO:1902600//GO:0046034//GO:0007275	proton transmembrane transport//ATP metabolic process//multicellular organism development	GO:0016887//GO:0005525//GO:0003924//GO:0005524//GO:0043531	ATPase activity//GTP binding//GTPase activity//ATP binding//ADP binding	GO:0016021	integral component of membrane	KOG1350	F0F1-type ATP synthase, beta subunit	UP	8.6688	2.42e-10	blast,frame:1 start:145 end:1725
Cluster-41647.31513	1162.92	1205.4	3691.99	79	81	25	31.78	32.87	101.06	2.1	2.24	0.69	1502	672136569	XP_008791987.1	555	4.8e-54	NAC domain-containing protein 22-like [Phoenix dactylifera]	--	--	--	--	--	-	-	-	http://www.genome.jp/dbget-bin/www_bget?ko:-	Q10S65	489	8.2e-48	NAC domain-containing protein 22 OS=Oryza sativa subsp. japonica OX=39947 GN=NAC022 PE=2 SV=1	PF02365//PF10447	No apical meristem (NAM) protein//Exosome component EXOSC1/CSL4	GO:0006355	regulation of transcription, DNA-templated	GO:0003677//GO:0003723	DNA binding//RNA binding	GO:0000178	exosome (RNase complex)	--	--	UP	5.021	2.53e-10	estscan,start:1350 end:394; minus strand
Cluster-41647.13048	193	204.8	358.43	21.22	20	7	15.46	15.75	27.96	1.6	1.56	0.55	686	1150106980	XP_020239755.1	816	1.2e-84	L-type lectin-domain containing receptor kinase IX.1 [Cajanus cajan]	--	--	--	--	--	-	-	-	http://www.genome.jp/dbget-bin/www_bget?ko:-	Q9LXA5	682	1.6e-70	L-type lectin-domain containing receptor kinase IX.1 OS=Arabidopsis thaliana OX=3702 GN=LECRK91 PE=1 SV=1	PF07714//PF00069	Protein tyrosine and serine/threonine kinase//Protein kinase domain	GO:0006468	protein phosphorylation	GO:0004672//GO:0005524	protein kinase activity//ATP binding	--	--	--	--	UP	3.9474	2.53e-10	estscan,start:1 end:686
Cluster-41647.11122	121	128	146	9	1	2	8.58	8.77	10.13	0.6	0.07	0.14	741	1026106456	XP_016552229.1	223	7.4e-16	PREDICTED: uncharacterized protein LOC107851665 [Capsicum annuum]	--	--	--	--	--	-	-	-	http://www.genome.jp/dbget-bin/www_bget?ko:-	--	--	--	--	--	--	--	--	--	--	--	--	--	--	UP	5.0231	2.57e-10	blast,frame:2 start:257 end:562
Cluster-23449.0	122	983	1105	1	1	0	1.88	15.28	17.2	0.02	0.02	0	2455	971513326	GAQ84878.1	1514	4.9e-165	DEAD/DEAH box RNA helicase family protein [Klebsormidium nitens]	XM_018164352.1	XM_018164352	156	5.48e-73	PREDICTED: Hyalella azteca spliceosome RNA helicase DDX39B-like (LOC108676291), mRNA	K12812	UAP56, BAT1, SUB2	ATP-dependent RNA helicase UAP56/SUB2	http://www.genome.jp/dbget-bin/www_bget?ko:K12812	Q5U216	1758	9.5e-195	ATP-dependent RNA helicase DDX39A OS=Rattus norvegicus OX=10116 GN=Ddx39a PE=2 SV=1	PF15966//PF00580//PF00270//PF06862//PF02419//PF04851//PF16906	F-box//UvrD/REP helicase N-terminal domain//DEAD/DEAH box helicase//Utp25, U3 small nucleolar RNA-associated SSU processome protein 25//PsbL protein//Type III restriction enzyme, res subunit//Ribosomal proteins L26 eukaryotic, L24P archaeal	GO:0042254//GO:0015979//GO:0006412	ribosome biogenesis//photosynthesis//translation	GO:0003676//GO:0003677//GO:0005515//GO:0003735//GO:0005524//GO:0016787	nucleic acid binding//DNA binding//protein binding//structural constituent of ribosome//ATP binding//hydrolase activity	GO:0016020//GO:0015934//GO:0005840//GO:0009523//GO:0009539//GO:0005634	membrane//large ribosomal subunit//ribosome//photosystem II//photosystem II reaction center//nucleus	KOG0329	ATP-dependent RNA helicase	UP	10.07	2.66e-10	blast,frame:3 start:90 end:1427
Cluster-41647.6932	135	1238	1765	2	5	0	0.61	5.71	8.13	0.01	0.02	0	7709	1229762259	XP_022133739.1	4756	0	clathrin heavy chain 1 [Momordica charantia]	XM_014749663.1	XM_014749663	704	0	PREDICTED: Polistes canadensis clathrin heavy chain (LOC106787363), transcript variant X2, mRNA	K04646	CLTC	clathrin heavy chain	http://www.genome.jp/dbget-bin/www_bget?ko:K04646	Q68FD5	6742	0	Clathrin heavy chain 1 OS=Mus musculus OX=10090 GN=Cltc PE=1 SV=3	PF00413//PF13176//PF03846//PF00515//PF04053//PF09280//PF09268//PF00637	Matrixin//Tetratricopeptide repeat//Cell division inhibitor SulA//Tetratricopeptide repeat//Coatomer WD associated region//XPC-binding domain//Clathrin, heavy-chain linker//Region in Clathrin and VPS	GO:0043161//GO:0051782//GO:0016192//GO:0006281//GO:0006289//GO:0009432//GO:0006886//GO:0006508	proteasome-mediated ubiquitin-dependent protein catabolic process//negative regulation of cell division//vesicle-mediated transport//DNA repair//nucleotide-excision repair//SOS response//intracellular protein transport//proteolysis	GO:0005198//GO:0005515//GO:0003684//GO:0004222//GO:0008270	structural molecule activity//protein binding//damaged DNA binding//metalloendopeptidase activity//zinc ion binding	GO:0030132//GO:0031012//GO:0030130//GO:0030117	clathrin coat of coated pit//extracellular matrix//clathrin coat of trans-Golgi network vesicle//membrane coat	KOG0985	Vesicle coat protein clathrin, heavy chain	UP	8.7743	2.67e-10	blast,frame:-2 start:7471 end:2453
Cluster-41647.13666	902.13	465.65	1656.78	49.91	49.43	18.32	21.97	11.34	40.48	1.19	1.22	0.45	1653	148906881	ABR16586.1	571	7.4e-56	unknown [Picea sitchensis]	JQ018052.1	JQ018052	78	8.4e-30	Pinus taeda isolate 3828 hypothetical protein (0_17554_01) gene, partial cds	-	-	-	http://www.genome.jp/dbget-bin/www_bget?ko:-	Q9S745	301	5.7e-26	Lipase-like PAD4 OS=Arabidopsis thaliana OX=3702 GN=PAD4 PE=1 SV=1	PF16048	Frog antimicrobial peptide	GO:0006952	defense response	--	--	GO:0005576	extracellular region	--	--	UP	4.6729	2.67e-10	blast,frame:-3 start:652 end:2
Cluster-38104.0	101	96	134	10	5	2	2.43	2.31	3.24	0.23	0.12	0.05	1669	148909386	ABR17791.1	1552	1.3e-169	unknown [Picea sitchensis]	XM_008806228.2	XM_008806228	374	0	PREDICTED: Phoenix dactylifera probable pectate lyase 8 (LOC103717735), transcript variant X2, mRNA	K01728	pel	pectate lyase	http://www.genome.jp/dbget-bin/www_bget?ko:K01728	Q93WF1	1413	6.6e-155	Probable pectate lyase 20 OS=Arabidopsis thaliana OX=3702 GN=At5g48900 PE=2 SV=1	PF01808	AICARFT/IMPCHase bienzyme	GO:0006144//GO:0006807//GO:0006164	purine nucleobase metabolic process//nitrogen compound metabolic process//purine nucleotide biosynthetic process	GO:0004643//GO:0003937	phosphoribosylaminoimidazolecarboxamide formyltransferase activity//IMP cyclohydrolase activity	GO:0042720	mitochondrial inner membrane peptidase complex	--	--	UP	4.2565	2.94e-10	blast,frame:-2 start:1641 end:217
Cluster-41647.6499	94	966	1503	3	2	0	0.78	8.13	12.65	0.02	0.02	0	4333	1343996774	XP_023880516.1	225	2.6e-15	vigilin 1-like [Quercus suber]	--	--	--	--	--	--	--	--	--	Q00341	820	9.8e-86	Vigilin OS=Homo sapiens OX=9606 GN=HDLBP PE=1 SV=2	PF07650//PF00013//PF13184	KH domain//KH domain//NusA-like KH domain	--	--	GO:0003723	RNA binding	--	--	KOG2208	Vigilin	UP	9.0041	2.97e-10	blast,frame:-3 start:3398 end:3
Cluster-41647.9314	410.19	703.06	487.41	99.85	98.49	83.93	5.23	9.05	6.28	1.25	1.28	1.09	2915	116794429	ABK27140.1	385	4.8e-34	unknown [Picea sitchensis]	EF676683.1	EF676683	44	1.19e-10	Picea sitchensis clone WS02747_M10 unknown mRNA	K04733	IRAK4	interleukin-1 receptor-associated kinase 4	http://www.genome.jp/dbget-bin/www_bget?ko:K04733	Q9LRJ9	278	4.7e-23	Cysteine-rich repeat secretory protein 38 OS=Arabidopsis thaliana OX=3702 GN=CRRSP38 PE=2 SV=1	PF09280	XPC-binding domain	GO:0006281//GO:0043161//GO:0006289	DNA repair//proteasome-mediated ubiquitin-dependent protein catabolic process//nucleotide-excision repair	GO:0003684	damaged DNA binding	--	--	--	--	UP	2.4245	2.97e-10	blast,frame:-3 start:2787 end:1975
Cluster-41647.8190	164	366	847.93	1	1	0	1.34	3.03	7.02	0.01	0.01	0	4400	694449460	XP_009350379.1	168	1.1e-08	PREDICTED: LOW QUALITY PROTEIN: uncharacterized protein LOC103941904, partial [Pyrus x bretschneideri]	XM_022107636.1	XM_022107636	158	7.65e-74	PREDICTED: Folsomia candida uncharacterized LOC110858766 (LOC110858766), transcript variant X2, mRNA	--	--	--	--	--	--	--	--	PF01917//PF04971//PF00686//PF00584	Archaebacterial flagellin//Bacteriophage P21 holin S//Starch binding domain//SecE/Sec61-gamma subunits of protein translocation complex	GO:0006605//GO:0097588//GO:0006886//GO:0019835	protein targeting//archaeal or bacterial-type flagellum-dependent cell motility//intracellular protein transport//cytolysis	GO:2001070//GO:0005198	starch binding//structural molecule activity	GO:0016020	membrane	--	--	UP	9.3918	3.22e-10	blast,frame:-2 start:3976 end:845
Cluster-41647.5594	100	590	1301	0	0	0	2.1	12.45	27.53	0	0	0	1871	--	--	--	--	--	--	--	--	--	--	--	--	--	--	--	--	--	--	PF00517	Retroviral envelope protein	--	--	GO:0005198	structural molecule activity	--	--	--	--	UP	11.75	3.22e-10	estscan,start:1564 end:131; minus strand
Cluster-41647.24103	164	187	176	47	39	38.02	12.4	13.62	13	3.35	2.89	2.81	711	1557851100	RWR77457.1	203	1.5e-13	pleiotropic drug resistance protein 1-like protein isoform X1 [Cinnamomum micranthum f. kanehirae]	--	--	--	--	--	-	-	-	http://www.genome.jp/dbget-bin/www_bget?ko:-	Q949G3	193	8.2e-14	Pleiotropic drug resistance protein 1 OS=Nicotiana plumbaginifolia OX=4092 GN=PDR1 PE=1 SV=1	--	--	--	--	--	--	--	--	--	--	UP	2.0153	3.43e-10	blast,frame:-1 start:345 end:1
Cluster-41647.27118	388.11	528.7	1253.29	21.02	2.26	5	45.81	58.41	141.53	2.27	0.25	0.56	549	1102780248	XP_010273196.2	235	2.2e-17	PREDICTED: LRR receptor-like serine/threonine-protein kinase GSO1 [Nelumbo nucifera]	--	--	--	--	--	-	-	-	http://www.genome.jp/dbget-bin/www_bget?ko:-	Q9LJW7	172	1.7e-11	Receptor-like protein 43 OS=Arabidopsis thaliana OX=3702 GN=RLP43 PE=2 SV=1	PF13516//PF00560//PF13855	Leucine Rich repeat//Leucine Rich Repeat//Leucine rich repeat	--	--	GO:0005515	protein binding	--	--	--	--	UP	6.304	3.56e-10	blast,frame:2 start:2 end:547
Cluster-41647.10195	770	7083.94	10230	7	20	0	16.88	155.61	225.32	0.15	0.44	0	1807	1241380827	ASZ85176.1	1882	7.7e-208	elongation factor 1-alpha [Hylocereus polyrhizus]	XM_030681938.1	XM_030681938	622	0	PREDICTED: Rhodamnia argentea elongation factor 1-alpha-like (LOC115746234), mRNA	K03231	EEF1A	elongation factor 1-alpha	http://www.genome.jp/dbget-bin/www_bget?ko:K03231	P29520	2017	6.5e-225	Elongation factor 1-alpha OS=Bombyx mori OX=7091 PE=2 SV=1	PF04670//PF03144//PF00009//PF01926//PF02774	Gtr1/RagA G protein conserved region//Elongation factor Tu domain 2//Elongation factor Tu GTP binding domain//50S ribosome-binding GTPase//Semialdehyde dehydrogenase, dimerisation domain	GO:0008652	cellular amino acid biosynthetic process	GO:0046983//GO:0003924//GO:0005525//GO:0016620	protein dimerization activity//GTPase activity//GTP binding//oxidoreductase activity, acting on the aldehyde or oxo group of donors, NAD or NADP as acceptor	--	--	KOG0052	Translation elongation factor EF-1 alpha/Tu	UP	9.3626	3.59e-10	blast,frame:-3 start:1625 end:228
Cluster-41647.24640	1002.58	968.01	1421.01	298	217	172.38	14.79	14.39	21.15	4.32	3.26	2.58	2556	294461229	ADE76177.1	1462	5.5e-159	unknown [Picea sitchensis]	--	--	--	--	--	-	-	-	http://www.genome.jp/dbget-bin/www_bget?ko:-	A0NDG6	287	3.7e-24	O-glucosyltransferase rumi homolog OS=Anopheles gambiae OX=7165 GN=AGAP004267 PE=3 SV=1	--	--	--	--	--	--	--	--	--	--	UP	2.2572	3.71e-10	blast,frame:1 start:835 end:2280
Cluster-41647.28904	2	6	1	284	157	76	0.04	0.12	0.02	5.75	3.3	1.59	1899	--	--	--	--	--	--	--	--	--	--	--	--	--	--	--	--	--	--	--	--	--	--	--	--	--	--	--	--	DOWN	-5.8536	3.81e-10	estscan,start:1299 end:767; minus strand
Cluster-41647.7575	145	1112	1610	6	4	0	1.3	10.1	14.62	0.05	0.04	0	4034	902550499	AKR76260.1	2065	1e-228	beta-1 tubulin [Dendrobium catenatum]	XM_030691676.1	XM_030691676	522	0	PREDICTED: Rhodamnia argentea tubulin beta chain (LOC115753167), mRNA	K07375	TUBB	tubulin beta	http://www.genome.jp/dbget-bin/www_bget?ko:K07375	O17449	2090	5e-233	Tubulin beta-1 chain OS=Manduca sexta OX=7130 PE=2 SV=1	PF00091//PF06682//PF07664	Tubulin/FtsZ family, GTPase domain//SOCE-associated regulatory factor of calcium homoeostasis//Ferrous iron transport protein B C terminus	GO:2001256//GO:0006826	regulation of store-operated calcium entry//iron ion transport	GO:0015093//GO:0003924	ferrous iron transmembrane transporter activity//GTPase activity	GO:0016021//GO:0030176	integral component of membrane//integral component of endoplasmic reticulum membrane	KOG1375	Beta tubulin	UP	8.1821	3.84e-10	blast,frame:2 start:428 end:1780
Cluster-41647.14222	98	1061	1367	1	3	0	1.34	14.65	18.89	0.01	0.04	0	2734	1516519763	VDC78458.1	483	2e-45	unnamed protein product [Brassica rapa]	--	--	--	--	--	K15979	SND1	staphylococcal nuclease domain-containing protein 1	http://www.genome.jp/dbget-bin/www_bget?ko:K15979	Q9W0S7	903	1.5e-95	Staphylococcal nuclease domain-containing protein 1 OS=Drosophila melanogaster OX=7227 GN=Tudor-SN PE=1 SV=1	--	--	--	--	--	--	--	--	KOG2039	Transcriptional coactivator p100	UP	9.2563	3.84e-10	blast,frame:-1 start:2734 end:500
Cluster-41647.8590	182	1775	4211	0	3	0	6.37	61.61	146.97	0	0.11	0	1231	--	--	--	--	--	--	--	--	--	--	--	--	--	--	P80518	185	1.2e-12	Adult-specific rigid cuticular protein 15.5 OS=Araneus diadematus OX=45920 PE=1 SV=1	PF00379	Insect cuticle protein	--	--	GO:0042302	structural constituent of cuticle	--	--	--	--	UP	10.939	3.84e-10	blast,frame:3 start:93 end:1040
Cluster-41647.12321	210	143	213	28	28	15	6.16	4.18	6.25	0.8	0.83	0.44	1418	321530322	ADW94528.1	870	1.3e-90	putative truncated TIR-NBS-LRR protein [Pinus monticola]	--	--	--	--	--	-	-	-	http://www.genome.jp/dbget-bin/www_bget?ko:-	A0A290U7C4	555	1.7e-55	Disease resistance protein Roq1 OS=Nicotiana benthamiana OX=4100 GN=ROQ1 PE=1 SV=1	PF01582//PF13676//PF00931	TIR domain//TIR domain//NB-ARC domain	GO:0007165	signal transduction	GO:0005515//GO:0043531	protein binding//ADP binding	--	--	--	--	UP	2.9433	3.84e-10	blast,frame:1 start:1 end:1416
Cluster-41647.7812	131	1450	2020	4	5	0	0.88	9.89	13.77	0.03	0.03	0	5291	--	--	--	--	--	--	--	--	--	--	--	--	--	--	P18947	306	4.8e-26	Vitellogenin-4 OS=Caenorhabditis elegans OX=6239 GN=vit-4 PE=1 SV=3	PF01347//PF09172//PF03166	Lipoprotein amino terminal region//Domain of unknown function (DUF1943)//MH2 domain	GO:0006869//GO:0006355	lipid transport//regulation of transcription, DNA-templated	GO:0005319	lipid transporter activity	--	--	--	--	UP	8.6382	3.86e-10	blast,frame:-2 start:4951 end:86
Cluster-41647.28234	1233	368	230	0	5	3	9.12	2.76	1.72	0	0.04	0.02	4835	1129207299	OLQ09244.1	278	2e-21	CMP-sialic acid transporter 5 [Symbiodinium microadriaticum]	--	--	--	--	--	--	--	--	--	Q8B0U2	2026	1.6e-225	RNA-directed RNA polymerase L OS=Lettuce big-vein associated virus (isolate Japan/Kagawa) OX=652962 GN=L PE=3 SV=1	PF00946	Mononegavirales RNA dependent RNA polymerase	GO:0006370//GO:0009451//GO:0006144	7-methylguanosine mRNA capping//RNA modification//purine nucleobase metabolic process	GO:0005524//GO:0003968//GO:0004482	ATP binding//RNA-directed 5'-3' RNA polymerase activity//mRNA (guanine-N7-)-methyltransferase activity	GO:0031379	RNA-directed RNA polymerase complex	--	--	UP	7.7018	3.86e-10	blast,frame:3 start:3 end:4589
Cluster-41647.15778	119	1315	1587	0	1	0	2.21	24.58	29.72	0	0.02	0	2082	1471997783	RHN69445.1	737	5.2e-75	Protein disulfide-isomerase [Medicago truncatula]	XM_001736995.1	XM_001736995	36	2.37e-06	Entamoeba dispar SAW760 protein disulfide isomerase, putative EDI_271830 mRNA, complete cds	K09580	PDIA1, P4HB	protein disulfide-isomerase A1	http://www.genome.jp/dbget-bin/www_bget?ko:K09580	Q5RDG4	999	8.3e-107	Protein disulfide-isomerase A3 OS=Pongo abelii OX=9601 GN=PDIA3 PE=2 SV=1	PF00085//PF08534//PF01216	Thioredoxin//Redoxin//Calsequestrin	GO:0045454	cell redox homeostasis	GO:0005509//GO:0016491	calcium ion binding//oxidoreductase activity	--	--	KOG0190	Protein disulfide isomerase (prolyl 4-hydroxylase beta subunit)	UP	11.382	4.16e-10	blast,frame:1 start:304 end:1851
Cluster-22628.0	166	131	85	0	0	0	5.45	4.27	2.79	0	0	0	1295	--	--	--	--	--	--	--	--	--	--	--	--	--	--	--	--	--	--	--	--	--	--	--	--	--	--	--	--	UP	9.3524	4.23e-10	estscan,start:1 end:994
Cluster-41647.9393	120	782	1377.17	1	1	0	10.11	63.06	112.79	0.08	0.08	0	665	--	--	--	--	--	--	--	--	--	--	--	--	--	--	--	--	--	--	--	--	--	--	--	--	--	--	--	--	UP	10.122	4.27e-10	estscan,start:1 end:150
Cluster-41647.14929	113	1361.01	1720.96	5	3	0	0.92	11.17	14.12	0.04	0.02	0	4437	1360875969	PSC73989.1	506	6.8e-48	CAMK CAMK1 kinase [Micractinium conductrix]	--	--	--	--	--	K08794	CAMK1	calcium/calmodulin-dependent protein kinase I	http://www.genome.jp/dbget-bin/www_bget?ko:K08794	Q6P431	1099	4.5e-118	MAP kinase-interacting serine/threonine-protein kinase 2 OS=Xenopus laevis OX=8355 GN=mknk2 PE=2 SV=1	PF09026//PF00069//PF07714//PF10717	Centromere protein B dimerisation domain//Protein kinase domain//Protein tyrosine and serine/threonine kinase//Occlusion-derived virus envelope protein ODV-E18	GO:0006468	protein phosphorylation	GO:0003682//GO:0003677//GO:0005524//GO:0004672	chromatin binding//DNA binding//ATP binding//protein kinase activity	GO:0000775//GO:0019031//GO:0005634//GO:0000785	chromosome, centromeric region//viral envelope//nucleus//chromatin	KOG0607	MAP kinase-interacting kinase and related serine/threonine protein kinases	UP	8.6592	4.27e-10	blast,frame:3 start:1221 end:2996
Cluster-41647.11306	223	178	370	23	14	6	3.78	3.04	6.32	0.38	0.24	0.1	2258	222635071	EEE65203.1	361	2.3e-31	hypothetical protein OsJ_20332 [Oryza sativa Japonica Group]	--	--	--	--	--	-	-	-	http://www.genome.jp/dbget-bin/www_bget?ko:-	P0C897	281	1.6e-23	Putative UPF0481 protein At3g02645 OS=Arabidopsis thaliana OX=3702 GN=At3g02645 PE=3 SV=1	--	--	--	--	--	--	--	--	--	--	UP	4.1527	4.38e-10	blast,frame:2 start:146 end:1870
Cluster-41647.16225	2869.89	2934.59	3422.69	1238.09	1011.94	951.51	21.93	22.72	26.49	9.35	7.92	7.4	4689	148907569	ABR16914.1	378	5e-33	unknown [Picea sitchensis]	EF677060.1	EF677060	195	2.2e-94	Picea sitchensis clone WS02761_A19 unknown mRNA	-	-	-	http://www.genome.jp/dbget-bin/www_bget?ko:-	Q56ZZ7	360	2.3e-32	Plastidic glucose transporter 4 OS=Arabidopsis thaliana OX=3702 GN=At5g16150 PE=1 SV=2	PF00083	Sugar (and other) transporter	GO:0055085	transmembrane transport	GO:0022857	transmembrane transporter activity	GO:0016021	integral component of membrane	KOG0254	Predicted transporter (major facilitator superfamily)	UP	1.4584	4.38e-10	blast,frame:1 start:3730 end:4086
Cluster-41647.3688	97	874	837	1	3	0	1.34	12.17	11.66	0.01	0.04	0	2714	226520510	ACO66499.1	1850	6e-204	glycosyltransferase family 35 protein [Micromonas commoda]	XM_028988763.1	XM_028988763	84	6.42e-33	PREDICTED: Denticeps clupeoides glycogen phosphorylase B (pygb), mRNA	K00688	PYG, glgP	glycogen phosphorylase	http://www.genome.jp/dbget-bin/www_bget?ko:K00688	Q9XTL9	2880	0	Glycogen phosphorylase OS=Drosophila melanogaster OX=7227 GN=GlyP PE=2 SV=2	PF00343	Carbohydrate phosphorylase	GO:0005975	carbohydrate metabolic process	GO:0008184	glycogen phosphorylase activity	--	--	KOG2099	Glycogen phosphorylase	UP	8.768	4.38e-10	blast,frame:-2 start:2635 end:53
Cluster-41647.5331	132	174	228	1475	1210	2072.87	4.25	5.57	7.34	46.11	39.25	66.95	1314	1484752064	XP_026456411.1	345	9.4e-30	serine/arginine-rich SC35-like splicing factor SCL28 isoform X1 [Papaver somniferum]	AK415731.1	AK415731	159	6.23e-75	Cryptomeria japonica mRNA, clone: CSFL015_B06, expressed in reproductive shoots	K12900	FUSIP1	FUS-interacting serine-arginine-rich protein 1	http://www.genome.jp/dbget-bin/www_bget?ko:K12900	Q9LHP2	297	1.3e-25	Serine/arginine-rich SC35-like splicing factor SCL30A OS=Arabidopsis thaliana OX=3702 GN=SCL30A PE=1 SV=1	PF00076	RNA recognition motif. (a.k.a. RRM, RBD, or RNP domain)	--	--	GO:0003676	nucleic acid binding	--	--	--	--	DOWN	-3.2698	4.38e-10	blast,frame:-2 start:671 end:225
Cluster-41647.9338	428.25	367.18	1863.78	10.01	21	10.27	20.64	17.38	88.97	0.46	1.01	0.49	966	1109281758	XP_019165208.1	434	3.3e-40	PREDICTED: NAC domain-containing protein 35 [Ipomoea nil]	--	--	--	--	--	-	-	-	http://www.genome.jp/dbget-bin/www_bget?ko:-	Q9ZVP8	397	2.5e-37	NAC domain-containing protein 35 OS=Arabidopsis thaliana OX=3702 GN=NAC035 PE=1 SV=2	PF02365	No apical meristem (NAM) protein	GO:0006355	regulation of transcription, DNA-templated	GO:0003677	DNA binding	--	--	--	--	UP	5.9515	4.48e-10	estscan,start:966 end:557; minus strand
Cluster-41647.27345	271	355	456	57	38	20	6.53	8.56	11.03	1.34	0.93	0.49	1668	148910488	ABR18319.1	735	7.2e-75	unknown [Picea sitchensis]	EF678574.1	EF678574	199	4.62e-97	Picea sitchensis clone WS02928_H12 unknown mRNA	-	-	-	http://www.genome.jp/dbget-bin/www_bget?ko:-	Q9M1P7	596	3.6e-60	Probable boron transporter 2 OS=Arabidopsis thaliana OX=3702 GN=BOR2 PE=2 SV=1	PF10181//PF00955	GPI-GlcNAc transferase complex, PIG-H component//HCO3- transporter family	GO:0006820	anion transport	GO:0017176	phosphatidylinositol N-acetylglucosaminyltransferase activity	GO:0016021	integral component of membrane	--	--	UP	3.2102	4.7e-10	blast,frame:2 start:2 end:694
Cluster-41647.9252	71	1335.06	2011	0	0	0	0.96	18.17	27.4	0	0	0	2770	694452200	XP_009351098.1	1823	8.2e-201	PREDICTED: inositol-3-phosphate synthase 1-A-like [Pyrus x bretschneideri]	XM_001848293.1	XM_001848293	73	8.54e-27	Culex quinquefasciatus myo-inositol-1 phosphate synthase, mRNA	K01858	INO1, ISYNA1	myo-inositol-1-phosphate synthase	http://www.genome.jp/dbget-bin/www_bget?ko:K01858	Q6DDT1	1536	5.9e-169	Inositol-3-phosphate synthase 1-B OS=Xenopus laevis OX=8355 GN=isyna1-b PE=2 SV=2	PF07994	Myo-inositol-1-phosphate synthase	GO:0008654//GO:0019872//GO:0006021	phospholipid biosynthetic process//streptomycin biosynthetic process//inositol biosynthetic process	GO:0004512	inositol-3-phosphate synthase activity	--	--	KOG0693	Myo-inositol-1-phosphate synthase	UP	12.525	4.74e-10	blast,frame:1 start:586 end:2325
Cluster-41647.13889	210	2228	2171	1	7	0	3.61	38.55	37.62	0.02	0.12	0	2230	698497426	XP_009794694.1	439	2e-40	PREDICTED: histone H2B [Nicotiana sylvestris]	XM_018640689.1	XM_018640689	194	3.74e-94	PREDICTED: Metaseiulus occidentalis histone H2B (LOC100903523), mRNA	-	-	-	http://www.genome.jp/dbget-bin/www_bget?ko:-	P02284	443	2.6e-42	Histone H2B, gonadal OS=Patella granatina OX=87972 PE=1 SV=2	PF00046//PF00125//PF05920//PF09726//PF03847	Homeodomain//Core histone H2A/H2B/H3/H4//Homeobox KN domain//Macoilin family//Transcription initiation factor TFIID subunit A	GO:0023041//GO:0006352//GO:0006355	neuronal signal transduction//DNA-templated transcription, initiation//regulation of transcription, DNA-templated	GO:0003677	DNA binding	GO:0030867//GO:0005669//GO:0000786	rough endoplasmic reticulum membrane//transcription factor TFIID complex//nucleosome	--	--	UP	9.109	4.74e-10	blast,frame:2 start:83 end:469
Cluster-41647.23398	343	288	676	40	30	15	38.24	30.18	72.33	4.1	3.2	1.6	566	--	--	--	--	--	--	--	--	--	--	--	--	--	--	--	--	--	--	--	--	--	--	--	--	--	--	--	--	UP	3.9207	4.77e-10	--
Cluster-41647.32201	97	1424.53	1701	2	4	0	2.37	34.75	41.62	0.05	0.1	0	1651	--	--	--	--	--	XM_020110623.1	XM_020110623	40	1.12e-08	PREDICTED: Paralichthys olivaceus TM2 domain containing 1 (tm2d1), transcript variant X1, mRNA	--	--	--	--	--	--	--	--	--	--	--	--	--	--	--	--	--	--	UP	9.0385	4.9e-10	estscan,start:1651 end:248; minus strand
Cluster-41647.28570	91	801.8	1190	2	3	0	0.57	5.07	7.52	0.01	0.02	0	5686	1315949841	GAY57875.1	382	2.1e-33	hypothetical protein CUMW_182810 [Citrus unshiu]	LT669794.1	LT669794	36	6.53e-06	Arabis alpina genome assembly, chromosome: 7	K03260	EIF4G	translation initiation factor 4G	http://www.genome.jp/dbget-bin/www_bget?ko:K03260	Q80XI3	454	3.6e-43	Eukaryotic translation initiation factor 4 gamma 3 OS=Mus musculus OX=10090 GN=Eif4g3 PE=1 SV=2	PF00060//PF02166//PF02854//PF00957	Ligand-gated ion channel//Androgen receptor//MIF4G domain//Synaptobrevin	GO:0006355//GO:0007165//GO:0006811//GO:0030521//GO:0016192	regulation of transcription, DNA-templated//signal transduction//ion transport//androgen receptor signaling pathway//vesicle-mediated transport	GO:0005496//GO:0015276//GO:0005515//GO:0003723//GO:0004879//GO:0003677	steroid binding//ligand-gated ion channel activity//protein binding//RNA binding//nuclear receptor activity//DNA binding	GO:0016020//GO:0016021//GO:0005634	membrane//integral component of membrane//nucleus	KOG0401	Translation initiation factor 4F, ribosome/mRNA-bridging subunit (eIF-4G)	UP	8.678	4.91e-10	blast,frame:-2 start:5643 end:2656
Cluster-41647.25683	666.17	951	2415	75	68	36	35.78	49.97	128.08	3.85	3.62	1.91	894	--	--	--	--	--	--	--	--	--	--	--	--	--	--	--	--	--	--	--	--	--	--	--	--	--	--	--	--	UP	4.4625	5.08e-10	--
Cluster-41647.23204	1015.09	412.58	1878.39	26.18	32.82	6.01	54.09	21.51	98.86	1.33	1.74	0.32	899	293329689	BAJ04354.1	856	3.6e-89	pollen allergen CPA63 [Cryptomeria japonica]	--	--	--	--	--	-	-	-	http://www.genome.jp/dbget-bin/www_bget?ko:-	O04496	340	9.3e-31	Aspartyl protease AED3 OS=Arabidopsis thaliana OX=3702 GN=AED3 PE=1 SV=1	--	--	--	--	--	--	--	--	--	--	UP	5.6576	5.18e-10	estscan,start:1 end:779
Cluster-41647.33937	123	150	189	23	21	20	5.5	6.61	8.39	0.99	0.94	0.89	1020	--	--	--	--	--	--	--	--	--	--	--	--	--	--	--	--	--	--	--	--	--	--	--	--	--	--	--	--	UP	2.7791	5.18e-10	estscan,start:838 end:1020
Cluster-41647.9929	200	2061	2929	7	7	0	6.15	63.03	89.99	0.21	0.22	0	1365	1173942082	OQR91137.1	1412	1.8e-153	60S ribosomal protein L3 [Thraustotheca clavata]	XM_015940459.1	XM_015940459	294	5.83e-150	PREDICTED: Tetranychus urticae 60S ribosomal protein L3 (LOC107372253), mRNA	K02925	RP-L3e, RPL3	large subunit ribosomal protein L3e	http://www.genome.jp/dbget-bin/www_bget?ko:K02925	P39023	1640	2.6e-181	60S ribosomal protein L3 OS=Homo sapiens OX=9606 GN=RPL3 PE=1 SV=2	PF00297	Ribosomal protein L3	GO:0042254//GO:0006412	ribosome biogenesis//translation	GO:0003735	structural constituent of ribosome	GO:0005840	ribosome	KOG0746	60S ribosomal protein L3 and related proteins	UP	8.546	5.18e-10	blast,frame:2 start:47 end:1342
Cluster-41647.9522	83	904	1369.01	2	1	0	0.98	10.78	16.33	0.02	0.01	0	3128	1335043290	PNW77903.1	600	6.1e-59	hypothetical protein CHLRE_10g456400v5 [Chlamydomonas reinhardtii]	XM_024084203.1	XM_024084203	59	5.86e-19	PREDICTED: Bicyclus anynana excitatory amino acid transporter 3 (LOC112047186), mRNA	-	-	-	http://www.genome.jp/dbget-bin/www_bget?ko:-	P43004	1004	3.3e-107	Excitatory amino acid transporter 2 OS=Homo sapiens OX=9606 GN=SLC1A2 PE=1 SV=2	PF02166//PF00375	Androgen receptor//Sodium:dicarboxylate symporter family	GO:0006355//GO:0007165//GO:0030521//GO:0006810	regulation of transcription, DNA-templated//signal transduction//androgen receptor signaling pathway//transport	GO:0005496//GO:0015293//GO:0003677//GO:0004879	steroid binding//symporter activity//DNA binding//nuclear receptor activity	GO:0016021//GO:0005634	integral component of membrane//nucleus	KOG3787	Glutamate/aspartate and neutral amino acid transporters	UP	9.6112	6.03e-10	blast,frame:2 start:194 end:1975
Cluster-41647.14779	104	909	1107	1	1	0	2.09	18.35	22.4	0.02	0.02	0	1945	1605316043	TFJ84658.1	1130	1.3e-120	hypothetical protein NSK_004122 [Nannochloropsis salina CCMP1776]	XM_015328977.1	XM_015328977	71	7.72e-26	PREDICTED: Polistes dominula fructose-bisphosphate aldolase-like (LOC107070615), transcript variant X3, mRNA	K01623	ALDO	fructose-bisphosphate aldolase, class I	http://www.genome.jp/dbget-bin/www_bget?ko:K01623	Q9GP32	1306	2e-142	Fructose-bisphosphate aldolase OS=Echinococcus multilocularis OX=6211 GN=FBPA PE=2 SV=1	PF16367//PF08777//PF00274//PF00076	RNA recognition motif//RNA binding motif//Fructose-bisphosphate aldolase class-I//RNA recognition motif. (a.k.a. RRM, RBD, or RNP domain)	GO:0006094//GO:0006096//GO:0006000//GO:0006020//GO:0006098//GO:0006013//GO:0015976	gluconeogenesis//glycolytic process//fructose metabolic process//inositol metabolic process//pentose-phosphate shunt//mannose metabolic process//carbon utilization	GO:0004332//GO:0003723//GO:0003676	fructose-bisphosphate aldolase activity//RNA binding//nucleic acid binding	--	--	KOG1557	Fructose-biphosphate aldolase	UP	10.012	6.18e-10	blast,frame:2 start:2 end:1279
Cluster-41647.26606	306	254	1034	19	15	13	5.01	4.18	17.05	0.31	0.25	0.22	2331	--	--	--	--	--	--	--	--	--	--	--	--	--	--	--	--	--	--	PF02517//PF03980	CPBP intramembrane metalloprotease//Nnf1	GO:0071586//GO:0006508	CAAX-box protein processing//proteolysis	GO:0004197	cysteine-type endopeptidase activity	GO:0000818//GO:0016020	nuclear MIS12/MIND complex//membrane	--	--	UP	5.0363	6.24e-10	estscan,start:854 end:498; minus strand
Cluster-41647.31330	145	1344	1904	7	2	0	2.65	24.69	35.05	0.13	0.04	0	2114	545713085	XP_005708846.1	1930	2.5e-213	F-type H+-transporting ATPase subunit alpha [Galdieria sulphuraria]	MH990587.1	MH990587	459	0	Tetranychus truncatus clone 152 ATP synthase subunit alpha mRNA, complete cds	K02132	ATPeF1A, ATP5A1, ATP1	F-type H+-transporting ATPase subunit alpha	http://www.genome.jp/dbget-bin/www_bget?ko:K02132	P80021	2224	7.6e-249	ATP synthase subunit alpha, mitochondrial OS=Sus scrofa OX=9823 GN=ATP5F1A PE=1 SV=2	PF00006//PF02874//PF00306	ATP synthase alpha/beta family, nucleotide-binding domain//ATP synthase alpha/beta family, beta-barrel domain//ATP synthase alpha/beta chain, C terminal domain	GO:0046034//GO:1902600//GO:0015986	ATP metabolic process//proton transmembrane transport//ATP synthesis coupled proton transport	GO:0005524	ATP binding	--	--	KOG1353	F0F1-type ATP synthase, alpha subunit	UP	8.606	6.5e-10	blast,frame:2 start:233 end:1924
Cluster-41647.6721	78.01	369	431	0	0	0	1.13	5.4	6.31	0	0	0	2594	--	--	--	--	--	--	--	--	--	--	--	--	--	--	Q95212	212	1.9e-15	Tumor protein D52 OS=Oryctolagus cuniculus OX=9986 GN=TPD52 PE=2 SV=1	PF03938//PF04891	Outer membrane protein (OmpH-like)//NifQ	GO:0009399	nitrogen fixation	GO:0030151//GO:0051082	molybdenum ion binding//unfolded protein binding	--	--	KOG4010	Coiled-coil protein TPD52	UP	10.56	6.84e-10	blast,frame:1 start:769 end:1338
Cluster-41647.17465	10019	12268.3	10187.6	4524.54	3583.33	2683	301.27	367.37	306.42	132.21	108.63	80.99	1389	148908428	ABR17327.1	944	3.5e-99	unknown [Picea sitchensis]	--	--	--	--	--	-	-	-	http://www.genome.jp/dbget-bin/www_bget?ko:-	Q9SJL0	695	9.9e-72	UDP-glycosyltransferase 86A1 OS=Arabidopsis thaliana OX=3702 GN=UGT86A1 PE=2 SV=1	PF00201//PF04101	UDP-glucoronosyl and UDP-glucosyl transferase//Glycosyltransferase family 28 C-terminal domain	--	--	GO:0016758	transferase activity, transferring hexosyl groups	--	--	--	--	UP	1.5353	6.94e-10	blast,frame:-1 start:1302 end:163
Cluster-29929.1	276	181	632	14	17	7	19.94	12.62	44.66	0.95	1.2	0.5	732	1098743533	XP_018836890.1	212	1.4e-14	PREDICTED: uncharacterized protein LOC109003266 [Juglans regia]	AK410876.1	AK410876	104	1.28e-44	Cryptomeria japonica mRNA, clone: CLFL018_J18, expressed in needles	-	-	-	http://www.genome.jp/dbget-bin/www_bget?ko:-	Q8GWS3	131	1.3e-06	Heavy metal-associated isoprenylated plant protein 2 OS=Arabidopsis thaliana OX=3702 GN=HIPP02 PE=3 SV=1	PF02983//PF00403	Alpha-lytic protease prodomain//Heavy-metal-associated domain	GO:0006508//GO:0030001	proteolysis//metal ion transport	GO:0008236//GO:0046872	serine-type peptidase activity//metal ion binding	GO:0005576	extracellular region	--	--	UP	4.801	7.05e-10	blast,frame:-2 start:659 end:366
Cluster-41647.4618	76	817	967	2	2	0	1.6	17.3	20.52	0.04	0.04	0	1866	551562645	XP_005768077.1	786	9.8e-81	hypothetical protein EMIHUDRAFT_356350, partial [Emiliania huxleyi CCMP1516]	--	--	--	--	--	K08245	E3.4.23.40	phytepsin	http://www.genome.jp/dbget-bin/www_bget?ko:K08245	Q03168	986	2.4e-105	Lysosomal aspartic protease OS=Aedes aegypti OX=7159 GN=AAEL006169 PE=1 SV=2	PF07966//PF07928	A1 Propeptide//Vps54-like protein	GO:0006508//GO:0042147	proteolysis//retrograde transport, endosome to Golgi	GO:0004190	aspartic-type endopeptidase activity	--	--	KOG1339	Aspartyl protease	UP	8.8399	7.4e-10	blast,frame:2 start:314 end:1627
Cluster-41647.33663	77	487	673	0	0	0	2.16	13.62	18.9	0	0	0	1470	1142678388	ONM36431.1	620	1.4e-61	Aldose reductase [Zea mays]	--	--	--	--	--	-	-	-	http://www.genome.jp/dbget-bin/www_bget?ko:-	P15122	909	1.6e-96	Aldo-keto reductase family 1 member B1 OS=Oryctolagus cuniculus OX=9986 GN=AKR1B1 PE=2 SV=3	--	--	--	--	--	--	--	--	KOG1577	Aldo/keto reductase family proteins	UP	11.057	7.4e-10	blast,frame:2 start:440 end:1426
Cluster-41647.8610	71	845.83	726	0	0	0	1.45	17.38	14.96	0	0	0	1915	--	--	--	--	--	--	--	--	--	--	--	--	--	--	--	--	--	--	--	--	--	--	--	--	--	--	--	--	UP	11.46	7.78e-10	estscan,start:566 end:1201
Cluster-41647.10125	122	911	1221	6	2	0	1.97	14.82	19.89	0.1	0.03	0	2357	--	--	--	--	--	KM111007.1	KM111007	186	1.11e-89	Setoptus koraiensis voucher NJAUAcariEriSB10 16S ribosomal RNA gene, partial sequence; mitochondrial	--	--	--	--	--	--	--	--	--	--	--	--	--	--	--	--	--	--	UP	8.1721	7.88e-10	--
Cluster-41647.21248	1791.39	2820.3	3174.81	402.85	149.51	151.37	56.64	88.69	100.32	12.36	4.76	4.8	1334	1248280935	ATG29963.1	865	4.8e-90	CYP94D83 [Taxus chinensis]	XM_008442884.2	XM_008442884	40	8.97e-09	PREDICTED: Cucumis melo alkane hydroxylase MAH1-like (LOC103485332), mRNA	-	-	-	http://www.genome.jp/dbget-bin/www_bget?ko:-	Q9FMY1	578	3.5e-58	Cytochrome P450 86B1 OS=Arabidopsis thaliana OX=3702 GN=CYP86B1 PE=2 SV=1	PF00067	Cytochrome P450	GO:0055114	oxidation-reduction process	GO:0020037//GO:0016705//GO:0005506	heme binding//oxidoreductase activity, acting on paired donors, with incorporation or reduction of molecular oxygen//iron ion binding	--	--	--	--	UP	3.4561	7.99e-10	blast,frame:2 start:2 end:685
Cluster-41647.9666	81	779.38	1019.99	2	1	0	3.07	29.26	38.53	0.07	0.04	0	1156	388504474	AFK40303.1	515	1.6e-49	unknown [Lotus japonicus]	XM_023453342.1	XM_023453342	107	4.4e-46	PREDICTED: Lucilia cuprina V-type proton ATPase 16 kDa proteolipid subunit (LOC111690780), transcript variant X2, mRNA	K02155	ATPeV0C, ATP6L	V-type H+-transporting ATPase 16kDa proteolipid subunit	http://www.genome.jp/dbget-bin/www_bget?ko:K02155	P23380	519	2.1e-51	V-type proton ATPase 16 kDa proteolipid subunit OS=Drosophila melanogaster OX=7227 GN=Vha16-1 PE=2 SV=1	PF03802//PF00137//PF15234//PF10541	Apo-citrate lyase phosphoribosyl-dephospho-CoA transferase//ATP synthase subunit C//Linker for activation of T-cells//Nuclear envelope localisation domain	GO:0051191//GO:1902600//GO:0007165	prosthetic group biosynthetic process//proton transmembrane transport//signal transduction	GO:0015078	proton transmembrane transporter activity	GO:0033177//GO:0016021//GO:0016020	proton-transporting two-sector ATPase complex, proton-transporting domain//integral component of membrane//membrane	KOG0232	Vacuolar H+-ATPase V0 sector, subunits c/c'	UP	9.2806	8.05e-10	blast,frame:2 start:206 end:718
Cluster-41647.4863	179.65	241.46	188.51	50	31	24	4.56	6.12	4.8	1.24	0.8	0.61	1597	1278997631	XP_022859036.1	528	6.9e-51	disease resistance RPP13-like protein 4 [Olea europaea var. sylvestris]	--	--	--	--	--	K13457	RPM1, RPS3	disease resistance protein RPM1	http://www.genome.jp/dbget-bin/www_bget?ko:K13457	Q9STE7	423	3.9e-40	Putative disease resistance RPP13-like protein 3 OS=Arabidopsis thaliana OX=3702 GN=RPP13L3 PE=3 SV=1	PF05970//PF00931//PF05851//PF13855//PF01637	PIF1-like helicase//NB-ARC domain//Lentivirus virion infectivity factor (VIF)//Leucine rich repeat//ATPase domain predominantly from Archaea	GO:0019058//GO:0000723//GO:0006281	viral life cycle//telomere maintenance//DNA repair	GO:0043531//GO:0003678//GO:0005515//GO:0005524	ADP binding//DNA helicase activity//protein binding//ATP binding	GO:0005657	replication fork	--	--	UP	2.4914	8.06e-10	blast,frame:2 start:2 end:1597
Cluster-41647.10157	109	1014	1175	1	0	0	1.38	12.93	14.99	0.01	0	0	2941	604318664	EYU30156.1	580	1.2e-56	hypothetical protein MIMGU_mgv1a016714mg [Erythranthe guttata]	XM_012366762.1	XM_012366762	153	3.06e-71	PREDICTED: Linepithema humile PHD finger-like domain-containing protein 5A (LOC105672062), mRNA	K12834	PHF5A	PHD finger-like domain-containing protein 5A	http://www.genome.jp/dbget-bin/www_bget?ko:K12834	Q9NEW6	623	4.7e-63	Probable splicing factor, arginine/serine-rich 3 OS=Caenorhabditis elegans OX=6239 GN=rsp-3 PE=1 SV=2	PF08777//PF00076//PF16367//PF03660//PF03117	RNA binding motif//RNA recognition motif. (a.k.a. RRM, RBD, or RNP domain)//RNA recognition motif//PHF5-like protein//UL49 family	GO:0016032//GO:0000398	viral process//mRNA splicing, via spliceosome	GO:0003676//GO:0003723	nucleic acid binding//RNA binding	GO:0019033	viral tegument	KOG1705	Uncharacterized conserved protein, contains CXXC motifs	UP	10.987	8.24e-10	blast,frame:-2 start:495 end:127
Cluster-41647.31745	105	868	1156	4	4	0	0.53	4.47	5.95	0.02	0.02	0	6932	1376910826	XP_002965442.2	952	2e-99	dihydropyrimidinase [Selaginella moellendorffii]	--	--	--	--	--	K01464	DPYS, dht, hydA	dihydropyrimidinase	http://www.genome.jp/dbget-bin/www_bget?ko:K01464	Q14117	1239	4.1e-134	Dihydropyrimidinase OS=Homo sapiens OX=9606 GN=DPYS PE=1 SV=1	PF10717//PF01979//PF05309	Occlusion-derived virus envelope protein ODV-E18//Amidohydrolase family//TraE protein	GO:0000746	conjugation	GO:0016787	hydrolase activity	GO:0019031	viral envelope	KOG2584	Dihydroorotase and related enzymes	UP	8.0523	8.4e-10	blast,frame:2 start:4628 end:6661
Cluster-41647.10599	101	780	1095	1	1	0	1.14	8.86	12.45	0.01	0.01	0	3271	1373981188	XP_024366433.1	1217	1.8e-130	eukaryotic translation initiation factor 3 subunit A-like [Physcomitrella patens]	--	--	--	--	--	K03254	EIF3A	translation initiation factor 3 subunit A	http://www.genome.jp/dbget-bin/www_bget?ko:K03254	Q6PCR7	1938	1.7e-215	Eukaryotic translation initiation factor 3 subunit A OS=Danio rerio OX=7955 GN=eif3a PE=2 SV=1	--	--	--	--	--	--	--	--	KOG2072	Translation initiation factor 3, subunit a (eIF-3a)	UP	9.9126	8.83e-10	blast,frame:3 start:132 end:3269
Cluster-41647.32231	148	903	1880	0	2	0	0.98	6.09	12.67	0	0.01	0	5350	326526473	BAJ97253.1	1014	1e-106	predicted protein [Hordeum vulgare subsp. vulgare]	--	--	--	--	--	-	-	-	http://www.genome.jp/dbget-bin/www_bget?ko:-	P18173	963	3.2e-102	Glucose dehydrogenase [FAD, quinone] OS=Drosophila melanogaster OX=7227 GN=Gld PE=3 SV=3	PF05199//PF00732//PF01266//PF03612//PF03153//PF07992	GMC oxidoreductase//GMC oxidoreductase//FAD dependent oxidoreductase//Sorbitol phosphotransferase enzyme II N-terminus//Transcription factor IIA, alpha/beta subunit//Pyridine nucleotide-disulphide oxidoreductase	GO:0055114//GO:0006367//GO:0008643//GO:0009401	oxidation-reduction process//transcription initiation from RNA polymerase II promoter//carbohydrate transport//phosphoenolpyruvate-dependent sugar phosphotransferase system	GO:0016491//GO:0050660//GO:0016614//GO:0008982	oxidoreductase activity//flavin adenine dinucleotide binding//oxidoreductase activity, acting on CH-OH group of donors//protein-N(PI)-phosphohistidine-sugar phosphotransferase activity	GO:0016021//GO:0005672//GO:0009357	integral component of membrane//transcription factor TFIIA complex//protein-N(PI)-phosphohistidine-sugar phosphotransferase complex	--	--	UP	10.451	9.16e-10	blast,frame:-2 start:4704 end:2350
Cluster-41647.6798	152	1176	1681	4	0	0	4.2	32.43	46.53	0.11	0	0	1488	195605318	ACG24489.1	707	1.1e-71	60S ribosomal protein L7a [Zea mays]	--	--	--	--	--	K02936	RP-L7Ae, RPL7A	large subunit ribosomal protein L7Ae	http://www.genome.jp/dbget-bin/www_bget?ko:K02936	P12970	788	1.7e-82	60S ribosomal protein L7a OS=Mus musculus OX=10090 GN=Rpl7a PE=1 SV=2	PF03431	RNA replicase, beta-chain	GO:0039694//GO:0006144	viral RNA genome replication//purine nucleobase metabolic process	GO:0003968	RNA-directed 5'-3' RNA polymerase activity	GO:0031379	RNA-directed RNA polymerase complex	KOG3166	60S ribosomal protein L7A	UP	9.6034	9.28e-10	blast,frame:1 start:223 end:1434
Cluster-41647.10728	111	136.79	90	18	13	8.99	11.31	13.18	8.84	1.7	1.27	0.88	595	294462948	ADE77014.1	300	7.1e-25	unknown [Picea sitchensis]	--	--	--	--	--	-	-	-	http://www.genome.jp/dbget-bin/www_bget?ko:-	Q9FKZ1	168	5.4e-11	Probable disease resistance protein At5g66900 OS=Arabidopsis thaliana OX=3702 GN=At5g66900 PE=3 SV=1	PF13855	Leucine rich repeat	--	--	GO:0005515	protein binding	--	--	--	--	UP	3.0222	9.28e-10	estscan,start:595 end:1; minus strand
Cluster-41647.34474	102	360	679	1	3	0	0.38	1.37	2.58	0	0.01	0	9314	922862027	KOO29705.1	369	1.1e-31	TNC protein, partial [Chrysochromulina tobinii]	XM_017998694.1	XM_017998694	52	1.37e-14	PREDICTED: Drosophila busckii uncharacterized LOC108607702 (LOC108607702), transcript variant X2, mRNA	-	-	-	http://www.genome.jp/dbget-bin/www_bget?ko:-	P07207	1190	2.6e-128	Neurogenic locus Notch protein OS=Drosophila melanogaster OX=7227 GN=N PE=1 SV=3	PF10716	NADH dehydrogenase transmembrane subunit	GO:0006118//GO:0055114	obsolete electron transport//oxidation-reduction process	GO:0016655	oxidoreductase activity, acting on NAD(P)H, quinone or similar compound as acceptor	--	--	KOG1217	Fibrillins and related proteins containing Ca2+-binding EGF-like domains	UP	8.111	9.33e-10	blast,frame:-3 start:9312 end:853
Cluster-41647.7951	186	1581	1951	5	0	0	14.32	117.12	146.57	0.36	0	0	703	60543120	BAD90809.1	672	6.1e-68	histone 3 [Conocephalum conicum]	XM_021061889.2	XM_021061889	189	6.85e-92	PREDICTED: Exaiptasia pallida histone H3 (LOC110254842), mRNA	-	-	-	http://www.genome.jp/dbget-bin/www_bget?ko:-	Q71LE2	676	7.9e-70	Histone H3.3 OS=Sus scrofa OX=9823 GN=H3-3A PE=2 SV=3	PF00125//PF15630	Core histone H2A/H2B/H3/H4//CENP-S protein	--	--	GO:0003677	DNA binding	GO:0000786//GO:0071821	nucleosome//FANCM-MHF complex	KOG1745	Histones H3 and H4	UP	9.5997	9.9e-10	blast,frame:3 start:135 end:569
Cluster-41647.9152	83	406	884.8	0	0	0	1.08	5.35	11.67	0	0	0	2854	1271181695	PHU02903.1	624	9.1e-62	Cyclin-dependent kinase G-2 [Capsicum chinense]	--	--	--	--	--	-	-	-	http://www.genome.jp/dbget-bin/www_bget?ko:-	Q2TBL8	665	6.1e-68	Cyclin-dependent kinase 10 OS=Bos taurus OX=9913 GN=CDK10 PE=2 SV=1	PF00069//PF07415//PF07714	Protein kinase domain//Gammaherpesvirus latent membrane protein (LMP2) protein//Protein tyrosine and serine/threonine kinase	GO:0019042//GO:0006468	viral latency//protein phosphorylation	GO:0005524//GO:0004672	ATP binding//protein kinase activity	GO:0033644	host cell membrane	--	--	UP	11.215	9.99e-10	blast,frame:1 start:1 end:1095
Cluster-41647.34003	70	629	894	0	0	0	3.46	30.49	43.71	0	0	0	949	545713004	XP_005708806.1	456	9.1e-43	60S ribosomal protein L23Ae [Galdieria sulphuraria]	XM_014367815.2	XM_014367815	54	1.04e-16	PREDICTED: Trichogramma pretiosum 60S ribosomal protein L23a-like (LOC106650036), mRNA	K02893	RP-L23Ae, RPL23A	large subunit ribosomal protein L23Ae	http://www.genome.jp/dbget-bin/www_bget?ko:K02893	Q24JY1	480	5.7e-47	60S ribosomal protein L23a OS=Bos taurus OX=9913 GN=RPL23A PE=2 SV=1	PF00276	Ribosomal protein L23	GO:0006412//GO:0042254	translation//ribosome biogenesis	GO:0003735	structural constituent of ribosome	GO:0005840	ribosome	KOG1751	60s ribosomal protein L23	UP	11.423	1.01e-09	blast,frame:-3 start:911 end:210
Cluster-41647.34799	87	402	556	2	1	0	1.6	7.42	10.28	0.04	0.02	0	2105	--	--	--	--	--	--	--	--	--	--	--	--	--	--	P80303	481	9.8e-47	Nucleobindin-2 OS=Homo sapiens OX=9606 GN=NUCB2 PE=1 SV=3	PF13499//PF13202//PF13405//PF00036	EF-hand domain pair//EF hand//EF-hand domain//EF hand	--	--	GO:0005509	calcium ion binding	--	--	KOG3866	DNA-binding protein of the nucleobindin family	UP	8.424	1.01e-09	blast,frame:-3 start:2103 end:316
Cluster-41647.28038	199	1906	2710	10	3	0	2.84	27.45	39.07	0.14	0.04	0	2631	1249611726	GAX93656.1	1450	1.4e-157	ATP-dependent RNA helicase eIF4A [Pythium insidiosum]	XM_025498558.1	XM_025498558	181	7.45e-87	Meira miltonrushii putative TIF2-translation initiation factor eIF4A (FA14DRAFT_160183), mRNA	K03257	EIF4A	translation initiation factor 4A	http://www.genome.jp/dbget-bin/www_bget?ko:K03257	Q5RKI1	1549	1.8e-170	Eukaryotic initiation factor 4A-II OS=Rattus norvegicus OX=10116 GN=Eif4a2 PE=1 SV=1	PF04851//PF00580//PF00579//PF07652//PF00270//PF08082	Type III restriction enzyme, res subunit//UvrD/REP helicase N-terminal domain//tRNA synthetases class I (W and Y)//Flavivirus DEAD domain//DEAD/DEAH box helicase//PRO8NT (NUC069), PrP8 N-terminal domain	GO:0006418//GO:0000398	tRNA aminoacylation for protein translation//mRNA splicing, via spliceosome	GO:0004386//GO:0000166//GO:0003676//GO:0016787//GO:0005524//GO:0003677//GO:0004812	helicase activity//nucleotide binding//nucleic acid binding//hydrolase activity//ATP binding//DNA binding//aminoacyl-tRNA ligase activity	--	--	KOG0327	Translation initiation factor 4F, helicase subunit (eIF-4A) and related helicases	UP	8.592	1.02e-09	blast,frame:1 start:166 end:1422
Cluster-40075.0	80	743	880	2	3	0	0.34	3.19	3.77	0.01	0.01	0	8264	1060604832	AOG62271.1	425	3.1e-38	trimodular nonagonal cadherin, partial [Eurychasma dicksonii]	XM_015323744.1	XM_015323744	54	9.38e-16	PREDICTED: Polistes dominula neural-cadherin (LOC107067855), transcript variant X8, mRNA	--	--	--	--	O15943	6370	0	Neural-cadherin OS=Drosophila melanogaster OX=7227 GN=CadN PE=1 SV=2	PF07354//PF17144//PF00028	Zona-pellucida-binding protein (Sp38)//Ribosomal large subunit proteins 60S L5, and 50S L18//Cadherin domain	GO:0007156//GO:0042254//GO:0007339//GO:0006412	homophilic cell adhesion via plasma membrane adhesion molecules//ribosome biogenesis//binding of sperm to zona pellucida//translation	GO:0005509//GO:0003735//GO:0008097	calcium ion binding//structural constituent of ribosome//5S rRNA binding	GO:0016020//GO:0005576//GO:0005840	membrane//extracellular region//ribosome	KOG3594	FOG: Cadherin repeats	UP	8.3833	1.04e-09	blast,frame:3 start:858 end:7970
Cluster-41647.8694	79	681.88	783	2	1	0	0.89	7.79	8.95	0.02	0.01	0	3255	255966060	ACU45315.1	566	5.5e-55	ras [Rhodomonas sp. CCMP768]	XM_027854167.1	XM_027854167	168	1.56e-79	PREDICTED: Vombatus ursinus RAP1B, member of RAS oncogene family (RAP1B), transcript variant X2, mRNA	K07208	RHEB	Ras homolog enriched in brain	http://www.genome.jp/dbget-bin/www_bget?ko:K07208	P62833	834	1.8e-87	Ras-related protein Rap-1A OS=Bos taurus OX=9913 GN=RAP1A PE=1 SV=1	PF01926//PF00503//PF00071//PF00009//PF03193//PF00025//PF05132	50S ribosome-binding GTPase//G-protein alpha subunit//Ras family//Elongation factor Tu GTP binding domain//RsgA GTPase//ADP-ribosylation factor family//RNA polymerase III RPC4	GO:0006383//GO:0007186	transcription by RNA polymerase III//G protein-coupled receptor signaling pathway	GO:0031683//GO:0005525//GO:0003924//GO:0019001//GO:0003677	G-protein beta/gamma-subunit complex binding//GTP binding//GTPase activity//guanyl nucleotide binding//DNA binding	GO:0005666	RNA polymerase III complex	KOG0395	Ras-related GTPase	UP	8.992	1.05e-09	blast,frame:-2 start:2717 end:2136
Cluster-41647.6535	372.44	113	4155.71	1	1	2	45.69	12.94	486.75	0.11	0.12	0.23	538	--	--	--	--	--	--	--	--	--	--	--	--	--	--	--	--	--	--	--	--	--	--	--	--	--	--	--	--	UP	10.094	1.06e-09	--
Cluster-41647.9273	342	713	1234	40	30	44	30.71	61.06	107.44	3.35	2.61	3.83	640	--	--	--	--	--	--	--	--	--	--	--	--	--	--	--	--	--	--	--	--	--	--	--	--	--	--	--	--	UP	4.24	1.06e-09	--
Cluster-41647.11963	494	5451.46	6864.17	9	17	0	23.38	253.58	321.88	0.41	0.8	0	979	--	--	--	--	--	--	--	--	--	--	--	--	--	--	--	--	--	--	--	--	--	--	--	--	--	--	--	--	UP	8.9341	1.07e-09	estscan,start:1 end:123
Cluster-13790.0	80	591.97	827.07	3	2	0	3.93	28.58	40.27	0.14	0.1	0	952	1344000490	XP_023882479.1	245	2.7e-18	translationally-controlled tumor protein homolog [Quercus suber]	--	--	--	--	--	-	-	-	http://www.genome.jp/dbget-bin/www_bget?ko:-	G3LU44	523	5.9e-52	Translationally-controlled tumor protein homolog OS=Loxosceles intermedia OX=58218 PE=2 SV=1	--	--	--	--	--	--	--	--	KOG1727	Microtubule-binding protein (translationally controlled tumor protein)	UP	8.2239	1.07e-09	blast,frame:-1 start:748 end:200
Cluster-41647.8947	68	701	598	0	0	0	0.49	5.08	4.33	0	0	0	4995	545702864	XP_005703760.1	747	8.7e-76	AAA-type ATPase [Galdieria sulphuraria]	--	--	--	--	--	-	-	-	http://www.genome.jp/dbget-bin/www_bget?ko:-	Q6GX84	800	2.4e-83	Fidgetin-like protein 1 OS=Rattus norvegicus OX=10116 GN=Fignl1 PE=2 SV=1	PF07724//PF03249//PF04931//PF06524//PF00587//PF06068//PF00158//PF00004//PF09026//PF07728//PF05496//PF04889//PF13304	AAA domain (Cdc48 subfamily)//Type specific antigen//DNA polymerase phi//NOA36 protein//tRNA synthetase class II core domain (G, H, P, S and T)//TIP49 P-loop domain//Sigma-54 interaction domain//ATPase family associated with various cellular activities (AAA)//Centromere protein B dimerisation domain//AAA domain (dynein-related subfamily)//Holliday junction DNA helicase RuvB P-loop domain//Cwf15/C…	GO:0006281//GO:0006310//GO:0000398//GO:0006418//GO:0006355	DNA repair//DNA recombination//mRNA splicing, via spliceosome//tRNA aminoacylation for protein translation//regulation of transcription, DNA-templated	GO:0004812//GO:0003677//GO:0005524//GO:0008134//GO:0003682//GO:0016887//GO:0008270//GO:0009378//GO:0003678//GO:0000166	aminoacyl-tRNA ligase activity//DNA binding//ATP binding//transcription factor binding//chromatin binding//ATPase activity//zinc ion binding//four-way junction helicase activity//DNA helicase activity//nucleotide binding	GO:0005634//GO:0005657//GO:0005667//GO:0005730//GO:0009379//GO:0000785//GO:0000775//GO:0016021//GO:0005681	nucleus//replication fork//transcription regulator complex//nucleolus//Holliday junction helicase complex//chromatin//chromosome, centromeric region//integral component of membrane//spliceosomal complex	KOG0740	AAA+-type ATPase	UP	11.195	1.07e-09	blast,frame:2 start:2606 end:2890|blast,frame:3 start:1305 end:2543
Cluster-41647.19764	90	1092	1618	2	4	0	1.24	15.16	22.49	0.03	0.06	0	2720	1004143893	KXZ51875.1	460	9e-43	hypothetical protein GPECTOR_11g310 [Gonium pectorale]	--	--	--	--	--	-	-	-	http://www.genome.jp/dbget-bin/www_bget?ko:-	P08640	299	1.6e-25	Flocculation protein FLO11 OS=Saccharomyces cerevisiae (strain ATCC 204508 / S288c) OX=559292 GN=FLO11 PE=1 SV=2	--	--	--	--	--	--	--	--	--	--	UP	8.8385	1.07e-09	blast,frame:-3 start:2604 end:433
Cluster-41647.12460	104	915	1211	1	0	0	6.79	57.96	77.62	0.06	0	0	782	1570306812	RYR79406.1	825	1.2e-85	hypothetical protein Ahy_A01g004220 [Arachis hypogaea]	AY130416.1	AY130416	125	2.9e-56	Petromyzon marinus ribosomal protein L10 mRNA, partial cds	K02866	RP-L10e, RPL10	large subunit ribosomal protein L10e	http://www.genome.jp/dbget-bin/www_bget?ko:K02866	O96647	879	2.6e-93	60S ribosomal protein L10 OS=Bombyx mandarina OX=7092 GN=RpL10 PE=2 SV=1	PF00252	Ribosomal protein L16p/L10e	GO:0006412//GO:0042254	translation//ribosome biogenesis	GO:0003735	structural constituent of ribosome	GO:0005840	ribosome	KOG0857	60s ribosomal protein L10	UP	10.945	1.1e-09	blast,frame:1 start:28 end:750
Cluster-41647.14821	1222	1932	1858	146	37	26	23.89	37.92	36.55	2.8	0.73	0.51	1994	1273168917	PIA50635.1	837	1.3e-86	hypothetical protein AQUCO_01200087v1 [Aquilegia coerulea]	--	--	--	--	--	K13395	CYP719A1_2_3_13	(S)-stylopine/(S)-canadine/(S)-nandinine synthase [EC:1.14.21.1 1.14.21.5 1.14.21.12]	http://www.genome.jp/dbget-bin/www_bget?ko:K13395	Q50LH4	751	4.5e-78	Trifunctional (S)-stylopine synthase 2/(S)-nandinine synthase/(S)-canadine synthase OS=Eschscholzia californica OX=3467 GN=CYP719A3 PE=1 SV=1	PF00067	Cytochrome P450	GO:0055114	oxidation-reduction process	GO:0020037//GO:0016705//GO:0005506	heme binding//oxidoreductase activity, acting on paired donors, with incorporation or reduction of molecular oxygen//iron ion binding	--	--	--	--	UP	4.617	1.1e-09	blast,frame:1 start:1 end:1623
Cluster-41647.2715	33	35	16	3444	263	2467	1.29	1.35	0.62	129.91	10.3	96.22	1130	116781709	ABK22211.1	1012	3.7e-107	unknown [Picea sitchensis]	EF082859.1	EF082859	215	3.95e-106	Picea sitchensis clone WS0288_C08 unknown mRNA	K08235	E2.4.1.207	xyloglucan:xyloglucosyl transferase	http://www.genome.jp/dbget-bin/www_bget?ko:K08235	Q8LG58	791	5.9e-83	Probable xyloglucan endotransglucosylase/hydrolase protein 16 OS=Arabidopsis thaliana OX=3702 GN=XTH16 PE=2 SV=2	PF06955//PF00722	Xyloglucan endo-transglycosylase (XET) C-terminus//Glycosyl hydrolases family 16	GO:0006073//GO:0005975	cellular glucan metabolic process//carbohydrate metabolic process	GO:0016762//GO:0004553	xyloglucan:xyloglucosyl transferase activity//hydrolase activity, hydrolyzing O-glycosyl compounds	GO:0048046//GO:0005618	apoplast//cell wall	--	--	DOWN	-6.2655	1.19e-09	blast,frame:-3 start:1128 end:325
Cluster-41647.34523	301.34	379.35	334.37	21.74	38.83	9	8.72	10.94	9.68	0.61	1.13	0.26	1433	--	--	--	--	--	--	--	--	--	--	--	--	--	--	--	--	--	--	--	--	--	--	--	--	--	--	--	--	UP	3.8044	1.23e-09	--
Cluster-41647.32833	62	848	1079	0	0	0	4.55	59.99	77.36	0	0	0	725	--	--	--	--	--	--	--	--	--	--	--	--	--	--	P01267	150	8.1e-09	Thyroglobulin OS=Bos taurus OX=9913 GN=TG PE=1 SV=1	--	--	--	--	--	--	--	--	--	--	UP	11.741	1.27e-09	blast,frame:-2 start:607 end:113
Cluster-41647.6395	77	677	961	2	1	0	3.86	33.29	47.66	0.1	0.05	0	939	1025037144	XP_016444186.1	398	4.8e-36	PREDICTED: 40S ribosomal protein S15-like [Nicotiana tabacum]	XM_029525211.1	XM_029525211	69	4.73e-25	PREDICTED: Echeneis naucrates ribosomal protein S15 (rps15), mRNA	K02958	RP-S15e, RPS15	small subunit ribosomal protein S15e	http://www.genome.jp/dbget-bin/www_bget?ko:K02958	Q56K10	398	1.8e-37	40S ribosomal protein S15 OS=Bos taurus OX=9913 GN=RPS15 PE=2 SV=3	PF00203	Ribosomal protein S19	GO:0042254//GO:0006412	ribosome biogenesis//translation	GO:0003735	structural constituent of ribosome	GO:0005840	ribosome	KOG0898	40S ribosomal protein S15	UP	9.1489	1.27e-09	blast,frame:3 start:144 end:593
Cluster-41647.7603	104	836	903	1	0	0	0.76	6.19	6.69	0.01	0	0	4891	1376849427	PTQ40025.1	288	1.4e-22	hypothetical protein MARPO_0042s0064 [Marchantia polymorpha]	XM_011439567.2	XM_011439567	83	4.19e-32	PREDICTED: Crassostrea gigas bromodomain-containing protein 3 (LOC105335564), transcript variant X6, mRNA	-	-	-	http://www.genome.jp/dbget-bin/www_bget?ko:-	Q9ESU6	785	1.3e-81	Bromodomain-containing protein 4 OS=Mus musculus OX=10090 GN=Brd4 PE=1 SV=2	PF00439//PF10120	Bromodomain//Thiamine-phosphate synthase	--	--	GO:0004789//GO:0005515	thiamine-phosphate diphosphorylase activity//protein binding	--	--	KOG1474	Transcription initiation factor TFIID, subunit BDF1 and related bromodomain proteins	UP	10.667	1.27e-09	blast,frame:1 start:253 end:3870
Cluster-41647.16649	1914.59	1904.53	2439.29	390.81	353.92	150.9	88.26	86.38	111.5	17.31	16.27	6.91	998	1248280965	ATG29978.1	1215	9.4e-131	CYP94D79 [Taxus chinensis]	MF448657.1	MF448657	232	1.23e-115	Taxus wallichiana var. chinensis CYP94D79 mRNA, complete cds	-	-	-	http://www.genome.jp/dbget-bin/www_bget?ko:-	P98188	853	3.4e-90	Cytochrome P450 94A2 OS=Vicia sativa OX=3908 GN=CYP94A2 PE=2 SV=1	PF00067//PF00301	Cytochrome P450//Rubredoxin	GO:0055114	oxidation-reduction process	GO:0016705//GO:0005506//GO:0020037	oxidoreductase activity, acting on paired donors, with incorporation or reduction of molecular oxygen//iron ion binding//heme binding	--	--	--	--	UP	2.7764	1.28e-09	estscan,start:1 end:998
Cluster-24239.0	67	520	531	0	0	0	0.69	5.41	5.53	0	0	0	3549	1238986654	GAX84586.1	244	1.3e-17	hypothetical protein CEUSTIGMA_g12007.t1 [Chlamydomonas eustigma]	--	--	--	--	--	K02325	POLE2	DNA polymerase epsilon subunit 2	http://www.genome.jp/dbget-bin/www_bget?ko:K02325	Q9U1N0	741	1.2e-76	Hrp65 protein OS=Chironomus tentans OX=7153 GN=HRP65 PE=1 SV=1	PF04042//PF00076	DNA polymerase alpha/epsilon subunit B//RNA recognition motif. (a.k.a. RRM, RBD, or RNP domain)	GO:0006260	DNA replication	GO:0003677//GO:0003676	DNA binding//nucleic acid binding	--	--	KOG0115	RNA-binding protein p54nrb (RRM superfamily)	UP	10.907	1.3e-09	blast,frame:1 start:136 end:2064|blast,frame:-3 start:3547 end:2294
Cluster-41647.17346	4365	8208	9596	657	200	136	40.57	77.18	90.23	6.02	1.9	1.29	3903	90704793	BAE92291.1	2141	1.5e-237	putative phosphate transporter [Cryptomeria japonica]	AB254815.1	AB254815	530	0	Cryptomeria japonica mRNA for putative phosphate transporter, complete cds	K08176	PHO84	MFS transporter, PHS family, inorganic phosphate transporter	http://www.genome.jp/dbget-bin/www_bget?ko:K08176	Q494P0	1857	5e-206	Probable inorganic phosphate transporter 1-7 OS=Arabidopsis thaliana OX=3702 GN=PHT1-7 PE=2 SV=2	PF07690//PF03137//PF00083	Major Facilitator Superfamily//Organic Anion Transporter Polypeptide (OATP) family//Sugar (and other) transporter	GO:0055085	transmembrane transport	GO:0022857	transmembrane transporter activity	GO:0016020//GO:0016021	membrane//integral component of membrane	--	--	UP	4.5091	1.32e-09	blast,frame:2 start:1901 end:3598
Cluster-41647.11637	310	2721	3633	10	11	0	2.2	19.6	26.15	0.07	0.08	0	5023	1049305617	BAV38817.1	2059	6.4e-228	alpha-tubulin 5 [Marchantia polymorpha]	XM_016067355.1	XM_016067355	497	0	PREDICTED: Parasteatoda tepidariorum tubulin alpha chain, testis-specific-like (LOC107451299), mRNA	K07374	TUBA	tubulin alpha	http://www.genome.jp/dbget-bin/www_bget?ko:K07374	Q94572	2201	8.3e-246	Tubulin alpha-3 chain OS=Homarus americanus OX=6706 PE=2 SV=1	PF00091	Tubulin/FtsZ family, GTPase domain	--	--	GO:0003924	GTPase activity	--	--	KOG1376	Alpha tubulin	UP	8.3223	1.4e-09	blast,frame:3 start:219 end:1592
Cluster-41647.8685	131	1190	1758	0	3	0	7.64	67.68	101.02	0	0.17	0	844	326509349	BAJ91591.1	658	3.1e-66	predicted protein [Hordeum vulgare subsp. vulgare]	--	--	--	--	--	K02995	RP-S8e, RPS8	small subunit ribosomal protein S8e	http://www.genome.jp/dbget-bin/www_bget?ko:K02995	P62247	711	8.4e-74	40S ribosomal protein S8 OS=Danio rerio OX=7955 GN=rps8 PE=2 SV=2	--	--	--	--	--	--	--	--	KOG3283	40S ribosomal protein S8	UP	9.9305	1.43e-09	blast,frame:-2 start:690 end:58
Cluster-41647.22998	251.59	285.21	297.78	53.02	43.41	17.71	18.02	19.73	20.87	3.58	3.05	1.24	736	390979602	BAM21552.1	268	4.5e-21	hypothetical protein [Cryptomeria japonica]	--	--	--	--	--	-	-	-	http://www.genome.jp/dbget-bin/www_bget?ko:-	Q9SSL9	221	4.8e-17	Leucine-rich repeat receptor-like protein kinase PEPR1 OS=Arabidopsis thaliana OX=3702 GN=PEPR1 PE=1 SV=1	PF13516//PF13855//PF00560	Leucine Rich repeat//Leucine rich repeat//Leucine Rich Repeat	--	--	GO:0005515	protein binding	--	--	--	--	UP	2.8424	1.46e-09	blast,frame:-1 start:478 end:194
Cluster-41647.10867	99	873	1033	1	0	0	6.83	58.3	69.85	0.07	0	0	754	326532606	BAK05232.1	575	1.2e-56	predicted protein [Hordeum vulgare subsp. vulgare]	XM_026624603.1	XM_026624603	125	2.79e-56	PREDICTED: Ctenocephalides felis ubiquitin-60S ribosomal protein L40 (LOC113386843), mRNA	K02927	RP-L40e, RPL40	large subunit ribosomal protein L40e	http://www.genome.jp/dbget-bin/www_bget?ko:K02927	P0CH09	579	1.5e-58	Ubiquitin-60S ribosomal protein L40 OS=Saccharomyces cerevisiae (strain ATCC 204508 / S288c) OX=559292 GN=RPL40B PE=1 SV=1	PF01020	Ribosomal L40e family	GO:0042254//GO:0006412	ribosome biogenesis//translation	GO:0003735	structural constituent of ribosome	GO:0005840	ribosome	KOG0003	Ubiquitin/60s ribosomal protein L40 fusion	UP	10.79	1.47e-09	blast,frame:-2 start:615 end:172
Cluster-41647.3907	78	621	837	2	3	0	7.76	58.54	80.36	0.18	0.29	0	603	743867279	XP_011032690.1	518	3.8e-50	PREDICTED: 40S ribosomal protein S18-like [Populus euphratica]	--	--	--	--	--	K02964	RP-S18e, RPS18	small subunit ribosomal protein S18e	http://www.genome.jp/dbget-bin/www_bget?ko:K02964	Q8ISP0	550	2.8e-55	40S ribosomal protein S18 OS=Branchiostoma belcheri OX=7741 GN=RPS18 PE=2 SV=1	PF00416	Ribosomal protein S13/S18	GO:0042254//GO:0006412	ribosome biogenesis//translation	GO:0003723//GO:0003735	RNA binding//structural constituent of ribosome	GO:0005840	ribosome	KOG3311	Ribosomal protein S18	UP	8.2358	1.49e-09	blast,frame:-3 start:508 end:23
Cluster-41647.12716	761.76	1025.24	2680.05	81.21	63	23	7.63	10.38	27.14	0.8	0.64	0.23	3642	1585771387	XP_028080502.1	704	6.2e-71	probable LRR receptor-like serine/threonine-protein kinase At3g47570 [Camellia sinensis]	XM_010275397.1	XM_010275397	42	1.93e-09	PREDICTED: Nelumbo nucifera putative leucine-rich repeat receptor-like serine/threonine-protein kinase At2g24130 (LOC104609161), mRNA	-	-	-	http://www.genome.jp/dbget-bin/www_bget?ko:-	C0LGP4	639	8.1e-65	Probable LRR receptor-like serine/threonine-protein kinase At3g47570 OS=Arabidopsis thaliana OX=3702 GN=At3g47570 PE=2 SV=1	PF13516//PF05326//PF07714//PF00560//PF13855//PF00069//PF01110	Leucine Rich repeat//Seminal vesicle autoantigen (SVA)//Protein tyrosine and serine/threonine kinase//Leucine Rich Repeat//Leucine rich repeat//Protein kinase domain//Ciliary neurotrophic factor	GO:0007165//GO:0070120//GO:0043524//GO:0006468	signal transduction//ciliary neurotrophic factor-mediated signaling pathway//negative regulation of neuron apoptotic process//protein phosphorylation	GO:0005127//GO:0004672//GO:0005515//GO:0005524	ciliary neurotrophic factor receptor binding//protein kinase activity//protein binding//ATP binding	GO:0005576	extracellular region	--	--	UP	4.7384	1.49e-09	blast,frame:1 start:1 end:1311|blast,frame:3 start:1224 end:2024
Cluster-41647.7424	103	742	1014	1	0	0	4.05	28.83	39.65	0.04	0	0	1125	298711745	CBJ49282.1	145	1.3e-06	conserved unknown protein [Ectocarpus siliculosus]	--	--	--	--	--	--	--	--	--	Q2F5J3	144	6.2e-08	Partner of Y14 and mago OS=Bombyx mori OX=7091 GN=Pym PE=2 SV=1	--	--	--	--	--	--	--	--	--	--	UP	10.683	1.49e-09	blast,frame:-2 start:905 end:39
Cluster-41647.12571	186	1686.41	2085	9	6	0	1.02	9.41	11.62	0.05	0.03	0	6414	574104611	ETV70141.1	180	6.3e-10	hypothetical protein H257_14303 [Aphanomyces astaci]	--	--	--	--	--	--	--	--	--	P04069	200	1.1e-13	Carboxypeptidase B OS=Astacus astacus OX=6715 PE=1 SV=1	PF00246//PF05132//PF10288//PF00836//PF00536	Zinc carboxypeptidase//RNA polymerase III RPC4//Cytoplasmic tRNA 2-thiolation protein 2//Stathmin family//SAM domain (Sterile alpha motif)	GO:0002098//GO:0031110//GO:0006383//GO:0006508//GO:0034227	tRNA wobble uridine modification//regulation of microtubule polymerization or depolymerization//transcription by RNA polymerase III//proteolysis//tRNA thio-modification	GO:0004181//GO:0008270//GO:0005515//GO:0003677//GO:0000049	metallocarboxypeptidase activity//zinc ion binding//protein binding//DNA binding//tRNA binding	GO:0005666	RNA polymerase III complex	KOG2650	Zinc carboxypeptidase	UP	8.0711	1.52e-09	blast,frame:3 start:783 end:1982
Cluster-41647.35650	102	752	932	0	1	0	1.27	9.46	11.73	0	0.01	0	2978	574121052	ETV86529.1	382	1.1e-33	hypothetical protein, variant 1 [Aphanomyces astaci]	--	--	--	--	--	-	-	-	http://www.genome.jp/dbget-bin/www_bget?ko:-	Q5ZKZ9	583	2.1e-58	Lipase maturation factor 2 OS=Gallus gallus OX=9031 GN=LMF2 PE=2 SV=2	--	--	--	--	--	--	--	--	--	--	UP	10.624	1.52e-09	blast,frame:1 start:364 end:2316
Cluster-41647.10223	56	1546	995	0	0	0	0.57	15.88	10.22	0	0	0	3593	643740231	KDP45903.1	228	9.5e-16	hypothetical protein JCGZ_15463 [Jatropha curcas]	--	--	--	--	--	-	-	-	http://www.genome.jp/dbget-bin/www_bget?ko:-	Q4QQT0	460	4.5e-44	Mitochondrial RNA pseudouridine synthase Rpusd4 OS=Rattus norvegicus OX=10116 GN=Rpusd4 PE=2 SV=1	PF04163//PF00849//PF00669	Tht1-like nuclear fusion protein//RNA pseudouridylate synthase//Bacterial flagellin N-terminal helical region	GO:0009451//GO:0048288//GO:0001522//GO:0000742//GO:0071973	RNA modification//nuclear membrane fusion involved in karyogamy//pseudouridine synthesis//karyogamy involved in conjugation with cellular fusion//bacterial-type flagellum-dependent cell motility	GO:0009982//GO:0003723//GO:0005198	pseudouridine synthase activity//RNA binding//structural molecule activity	--	--	KOG1919	RNA pseudouridylate synthases	UP	12.116	1.52e-09	blast,frame:-2 start:2878 end:1604
Cluster-41647.32564	124	1258	1306	0	3	0	1.3	13.35	13.86	0	0.03	0	3486	922887280	KOO52925.1	694	8.5e-70	c-terminal binding protein [Chrysochromulina tobinii]	XM_015514441.1	XM_015514441	139	2.21e-63	PREDICTED: Diuraphis noxia C-terminal-binding protein (LOC107165978), transcript variant X2, mRNA	K00058	serA, PHGDH	D-3-phosphoglycerate dehydrogenase	http://www.genome.jp/dbget-bin/www_bget?ko:K00058	O46036	1442	5.9e-158	C-terminal-binding protein OS=Drosophila melanogaster OX=7227 GN=CtBP PE=1 SV=3	PF02826//PF03446//PF00389	D-isomer specific 2-hydroxyacid dehydrogenase, NAD binding domain//NAD binding domain of 6-phosphogluconate dehydrogenase//D-isomer specific 2-hydroxyacid dehydrogenase, catalytic domain	GO:0055114	oxidation-reduction process	GO:0050661//GO:0051287//GO:0016616	NADP binding//NAD binding//oxidoreductase activity, acting on the CH-OH group of donors, NAD or NADP as acceptor	--	--	KOG0067	Transcription factor CtBP	UP	9.7297	1.52e-09	blast,frame:-1 start:2175 end:523
Cluster-41647.31220	69	682.99	743	2	2	0	1.14	11.33	12.35	0.03	0.03	0	2315	485609427	EOD08428.1	1512	7.9e-165	histone deacetylase 1 [Emiliania huxleyi CCMP1516]	KP250871.1	KP250871	401	0	Tegillarca granosa histone deacetylase 1 (HDAC1) mRNA, complete cds	K06067	HDAC1_2	histone deacetylase 1/2	http://www.genome.jp/dbget-bin/www_bget?ko:K06067	O09106	1897	6.9e-211	Histone deacetylase 1 OS=Mus musculus OX=10090 GN=Hdac1 PE=1 SV=1	PF05764//PF00453	YL1 nuclear protein//Ribosomal protein L20	GO:0006338//GO:0006412//GO:0043486//GO:0006355//GO:0042254	chromatin remodeling//translation//histone exchange//regulation of transcription, DNA-templated//ribosome biogenesis	GO:0003735//GO:0019843	structural constituent of ribosome//rRNA binding	GO:0005634//GO:0005840	nucleus//ribosome	KOG1342	Histone deacetylase complex, catalytic component RPD3	UP	8.5223	1.53e-09	blast,frame:-3 start:1917 end:241
Cluster-44261.0	97	880	1327	0	1	0	4.38	39.09	59.39	0	0.05	0	1014	1344047068	XP_023903604.1	703	2.2e-71	60S ribosomal protein L15 [Quercus suber]	XM_020572643.1	XM_020572643	48	2.42e-13	Polysphondylium pallidum PN500 S60 ribosomal protein L15 partial mRNA	K02877	RP-L15e, RPL15	large subunit ribosomal protein L15e	http://www.genome.jp/dbget-bin/www_bget?ko:K02877	P30736	782	5.9e-82	60S ribosomal protein L15 OS=Chironomus tentans OX=7153 GN=RpL15 PE=3 SV=3	PF00827	Ribosomal L15	GO:0006412//GO:0042254	translation//ribosome biogenesis	GO:0003735	structural constituent of ribosome	GO:0005840	ribosome	KOG1678	60s ribosomal protein L15	UP	10.994	1.54e-09	blast,frame:-3 start:736 end:95
Cluster-41647.24305	9457.3	7741.75	15222.2	1810.21	953.39	699.12	398.48	321.88	637.34	73.48	40.17	29.35	1067	224286363	ACN40889.1	308	1.5e-25	unknown [Picea sitchensis]	--	--	--	--	--	-	-	-	http://www.genome.jp/dbget-bin/www_bget?ko:-	Q43194	236	1.3e-18	Non-specific lipid-transfer protein 2 OS=Sorghum bicolor OX=4558 GN=LTP2 PE=3 SV=1	--	--	--	--	--	--	--	--	--	--	UP	3.215	1.61e-09	blast,frame:-1 start:752 end:351
Cluster-41647.33699	287	2039	3193.05	11	9	0	1.56	11.23	17.57	0.06	0.05	0	6497	116781615	ABK22179.1	617	1.3e-60	unknown [Picea sitchensis]	--	--	--	--	--	K18121	GLYR	glyoxylate/succinic semialdehyde reductase [EC:1.1.1.79 1.1.1.-]	http://www.genome.jp/dbget-bin/www_bget?ko:K18121	Q175F8	844	2.4e-88	Putative oxidoreductase GLYR1 homolog OS=Aedes aegypti OX=7159 GN=AAEL006684 PE=3 SV=1	PF03846//PF03435//PF02468//PF02254//PF02826//PF03446//PF14833	Cell division inhibitor SulA//Saccharopine dehydrogenase NADP binding domain//Photosystem II reaction centre N protein (psbN)//TrkA-N domain//D-isomer specific 2-hydroxyacid dehydrogenase, NAD binding domain//NAD binding domain of 6-phosphogluconate dehydrogenase//NAD-binding of NADP-dependent 3-hydroxyisobutyrate dehydrogenase	GO:0051782//GO:0055114//GO:0015979//GO:0009432//GO:0006813	negative regulation of cell division//oxidation-reduction process//photosynthesis//SOS response//potassium ion transport	GO:0051287//GO:0016491//GO:0050661	NAD binding//oxidoreductase activity//NADP binding	GO:0009539//GO:0009523//GO:0016020	photosystem II reaction center//photosystem II//membrane	KOG0409	Predicted dehydrogenase	UP	8.1357	1.62e-09	blast,frame:3 start:219 end:2054
Cluster-41647.7981	66	457.93	650.81	0	0	0	0.99	6.95	9.88	0	0	0	2510	--	--	--	--	--	--	--	--	--	--	--	--	--	--	Q6ZN04	663	9.2e-68	RNA-binding protein MEX3B OS=Homo sapiens OX=9606 GN=MEX3B PE=1 SV=1	PF13184//PF00013//PF07650	NusA-like KH domain//KH domain//KH domain	--	--	GO:0003723	RNA binding	--	--	KOG2113	Predicted RNA binding protein, contains KH domain	UP	10.983	1.64e-09	blast,frame:2 start:833 end:1615
Cluster-41647.17521	2916.71	4612.13	4274.13	719.51	402	634.97	64.15	101.63	94.44	15.47	8.96	14.09	1802	1248280999	ATG29995.1	1664	1.5e-182	CYP750C26 [Taxus chinensis]	--	--	--	--	--	K20562	CYP736A	biphenyl-4-hydroxylase	http://www.genome.jp/dbget-bin/www_bget?ko:K20562	Q50EK4	1183	3.3e-128	Cytochrome P450 750A1 OS=Pinus taeda OX=3352 GN=CYP750A1 PE=2 SV=1	PF00067	Cytochrome P450	GO:0055114	oxidation-reduction process	GO:0005506//GO:0016705//GO:0020037	iron ion binding//oxidoreductase activity, acting on paired donors, with incorporation or reduction of molecular oxygen//heme binding	--	--	--	--	UP	2.667	1.65e-09	estscan,start:1733 end:468; minus strand
Cluster-41647.7477	74	687.27	858	1	2	0	0.9	8.44	10.54	0.01	0.02	0	3044	326496461	BAJ94692.1	1285	2.2e-138	predicted protein [Hordeum vulgare subsp. vulgare]	XM_026645616.1	XM_026645616	37	9.67e-07	PREDICTED: Vanessa tameamea eukaryotic translation initiation factor 3 subunit C (LOC113404661), mRNA	K03252	EIF3C	translation initiation factor 3 subunit C	http://www.genome.jp/dbget-bin/www_bget?ko:K03252	Q6PFQ2	1568	1.3e-172	Eukaryotic translation initiation factor 3 subunit C OS=Danio rerio OX=7955 GN=eif3c PE=1 SV=1	PF04277//PF05470	Oxaloacetate decarboxylase, gamma chain//Eukaryotic translation initiation factor 3 subunit 8 N-terminus	GO:0006525//GO:0006446//GO:0006090//GO:0006413//GO:0036376//GO:0006814//GO:0006560	arginine metabolic process//regulation of translational initiation//pyruvate metabolic process//translational initiation//sodium ion export across plasma membrane//sodium ion transport//proline metabolic process	GO:0031369//GO:0015081//GO:0008948//GO:0003743	translation initiation factor binding//sodium ion transmembrane transporter activity//oxaloacetate decarboxylase activity//translation initiation factor activity	GO:0016020//GO:0005840//GO:0005852	membrane//ribosome//eukaryotic translation initiation factor 3 complex	KOG1076	Translation initiation factor 3, subunit c (eIF-3c)	UP	9.0329	1.65e-09	blast,frame:3 start:126 end:3014
Cluster-41647.9726	81	637	709	1	3	0	1.1	8.74	9.74	0.01	0.04	0	2750	1173960024	OQS06192.1	942	1.2e-98	coronin [Thraustotheca clavata]	--	--	--	--	--	-	-	-	http://www.genome.jp/dbget-bin/www_bget?ko:-	B0R0D7	1300	1.4e-141	Coronin-1C-A OS=Danio rerio OX=7955 GN=coro1ca PE=2 SV=1	PF00400	WD domain, G-beta repeat	--	--	GO:0005515	protein binding	--	--	KOG0303	Actin-binding protein Coronin, contains WD40 repeats	UP	8.4285	1.66e-09	blast,frame:-3 start:2070 end:451
Cluster-41647.9375	63	538	603	0	0	0	0.83	7.17	8.04	0	0	0	2825	545364758	XP_005647419.1	586	2.3e-57	epocide hydrolase domain-containing protein [Coccomyxa subellipsoidea C-169]	--	--	--	--	--	-	-	-	http://www.genome.jp/dbget-bin/www_bget?ko:-	P79381	860	1.5e-90	Epoxide hydrolase 1 OS=Sus scrofa OX=9823 GN=EPHX1 PE=2 SV=1	--	--	--	--	--	--	--	--	KOG2770	Aminomethyl transferase	UP	11.015	1.67e-09	blast,frame:2 start:401 end:1810
Cluster-41647.6267	68	672	861	2	2	0	1.71	16.91	21.73	0.05	0.05	0	1608	1359798310	PRW34006.1	202	4.4e-13	60S acidic ribosomal P2 [Chlorella sorokiniana]	--	--	--	--	--	K02943	RP-LP2, RPLP2	large subunit ribosomal protein LP2	http://www.genome.jp/dbget-bin/www_bget?ko:K02943	P05387	217	3e-16	60S acidic ribosomal protein P2 OS=Homo sapiens OX=9606 GN=RPLP2 PE=1 SV=1	--	--	--	--	--	--	--	--	KOG3449	60S acidic ribosomal protein P2	UP	8.6245	1.7e-09	blast,frame:3 start:159 end:530
Cluster-41647.17461	363	231	295	11	2	0	14.62	9.19	11.82	0.43	0.08	0	1104	747077674	XP_011085969.1	706	1.1e-71	expansin-B3-like [Sesamum indicum]	BT112187.1	BT112187	42	5.71e-10	Picea glauca clone GQ03311_J10 mRNA sequence	K20628	exlX	expansin	http://www.genome.jp/dbget-bin/www_bget?ko:K20628	Q0DZ85	669	8.1e-69	Expansin-B16 OS=Oryza sativa subsp. japonica OX=39947 GN=EXPB16 PE=3 SV=1	--	--	--	--	--	--	--	--	--	--	UP	6.1378	1.72e-09	blast,frame:-2 start:1103 end:864|blast,frame:-1 start:891 end:214
Cluster-41647.4748	81	390	1132	0	0	0	1.55	7.52	21.87	0	0	0	2026	--	--	--	--	--	--	--	--	--	--	--	--	--	--	--	--	--	--	PF00560//PF13855	Leucine Rich Repeat//Leucine rich repeat	--	--	GO:0005515	protein binding	--	--	--	--	UP	11.441	1.74e-09	estscan,start:298 end:1941
Cluster-41647.25223	274	215	530.23	24.92	31.34	16	6.17	4.85	11.99	0.55	0.71	0.36	1767	148909248	ABR17724.1	282	2.6e-22	unknown [Picea sitchensis]	--	--	--	--	--	--	--	--	--	--	--	--	--	PF07819//PF01764	PGAP1-like protein//Lipase (class 3)	GO:0006629	lipid metabolic process	GO:0016788	hydrolase activity, acting on ester bonds	--	--	--	--	UP	3.7698	1.8e-09	estscan,start:1767 end:1202; minus strand
Cluster-41647.20289	76	570	783	1	2	0	5.01	36.44	50.66	0.06	0.13	0	777	152940797	ABS44863.1	532	1.2e-51	putative ribosomal protein S14 [Oryza sativa Japonica Group]	XM_015745005.2	XM_015745005	132	3.7e-60	PREDICTED: Cephus cinctus 40S ribosomal protein S14a (LOC107270204), transcript variant X2, mRNA	K02955	RP-S14e, RPS14	small subunit ribosomal protein S14e	http://www.genome.jp/dbget-bin/www_bget?ko:K02955	P62265	550	3.6e-55	40S ribosomal protein S14 OS=Cricetulus griseus OX=10029 GN=RPS14 PE=2 SV=3	PF03423//PF00411	Carbohydrate binding domain (family 25)//Ribosomal protein S11	GO:0006412//GO:0042254	translation//ribosome biogenesis	GO:0003735//GO:2001070	structural constituent of ribosome//starch binding	GO:0005840	ribosome	KOG0407	40S ribosomal protein S14	UP	8.8533	1.81e-09	blast,frame:3 start:195 end:680
Cluster-41647.17571	401.55	458.76	769.61	85.95	80.28	55	20.9	23.39	39.6	4.28	4.15	2.84	914	1471978607	RHN50272.1	162	1.1e-08	putative non-specific serine/threonine protein kinase [Medicago truncatula]	--	--	--	--	--	-	-	-	http://www.genome.jp/dbget-bin/www_bget?ko:-	--	--	--	--	PF04083	Partial alpha/beta-hydrolase lipase region	GO:0006629	lipid metabolic process	--	--	--	--	--	--	UP	2.83	1.81e-09	blast,frame:3 start:114 end:764
Cluster-41647.32640	89	983.69	1684	1	0	0	0.48	5.33	9.12	0.01	0	0	6597	--	--	--	--	--	XM_023780708.1	XM_023780708	38	5.86e-07	PREDICTED: Capsella rubella auxin response factor 7 (LOC17884034), transcript variant X3, mRNA	--	--	--	--	P84252	150	7.4e-08	Cuticle protein 16.8 OS=Ixodes ricinus OX=34613 PE=1 SV=1	PF00379//PF02932//PF05478	Insect cuticle protein//Neurotransmitter-gated ion-channel transmembrane region//Prominin	GO:0006811	ion transport	GO:0042302	structural constituent of cuticle	GO:0016021	integral component of membrane	--	--	UP	11.255	1.83e-09	blast,frame:1 start:622 end:6090
Cluster-41647.31839	109	1676	629	0	1	0	1.25	19.38	7.28	0	0.01	0	3218	--	--	--	--	--	--	--	--	--	--	--	--	--	--	--	--	--	--	PF12679//PF02601	ABC-2 family transporter protein//Exonuclease VII, large subunit	GO:0006308//GO:0055085	DNA catabolic process//transmembrane transport	GO:0008855	exodeoxyribonuclease VII activity	GO:0009318	exodeoxyribonuclease VII complex	--	--	UP	11.042	1.83e-09	estscan,start:2953 end:116; minus strand
Cluster-41647.32708	64	451	372	0	0	0	0.66	4.68	3.86	0	0	0	3560	1426009714	GBG86500.1	354	2.3e-30	hypothetical protein CBR_g41494 [Chara braunii]	--	--	--	--	--	-	-	-	http://www.genome.jp/dbget-bin/www_bget?ko:-	Q8VI56	1004	3.7e-107	Low-density lipoprotein receptor-related protein 4 OS=Mus musculus OX=10090 GN=Lrp4 PE=1 SV=3	PF00057//PF00813//PF04840//PF07645	Low-density lipoprotein receptor domain class A//FliP family//Vps16, C-terminal region//Calcium-binding EGF domain	GO:0006886//GO:0009306	intracellular protein transport//protein secretion	GO:0005515//GO:0005509	protein binding//calcium ion binding	GO:0016020//GO:0005737	membrane//cytoplasm	KOG1215	Low-density lipoprotein receptors containing Ca2+-binding EGF-like domains	UP	10.57	1.89e-09	blast,frame:2 start:1112 end:3478
Cluster-41647.3285	105	640	963	3	5	0	0.8	4.93	7.42	0.02	0.04	0	4711	1376855291	PTQ45844.1	276	3.4e-21	hypothetical protein MARPO_0013s0072 [Marchantia polymorpha]	--	--	--	--	--	K02942	RP-LP1, RPLP1	large subunit ribosomal protein LP1	http://www.genome.jp/dbget-bin/www_bget?ko:K02942	Q9NV70	1017	1.5e-108	Exocyst complex component 1 OS=Homo sapiens OX=9606 GN=EXOC1 PE=1 SV=4	PF06320//PF09763	GCN5-like protein 1 (GCN5L1)//Exocyst complex component Sec3	GO:0006887	exocytosis	--	--	GO:0000145//GO:0031083	exocyst//BLOC-1 complex	KOG1762	60s acidic ribosomal protein P1	UP	7.717	1.9e-09	blast,frame:-3 start:4424 end:4002|blast,frame:3 start:3 end:2267
Cluster-28704.0	174	83	432	4	4	2	13.9	6.37	33.63	0.3	0.31	0.16	687	--	--	--	--	--	--	--	--	--	--	--	--	--	--	--	--	--	--	--	--	--	--	--	--	--	--	--	--	UP	6.0666	1.9e-09	estscan,start:124 end:348
Cluster-41647.27984	176	936	1622	4	8	0	1.04	5.6	9.7	0.02	0.05	0	5996	--	--	--	--	--	--	--	--	--	--	--	--	--	--	Q15334	1025	2.3e-109	Lethal(2) giant larvae protein homolog 1 OS=Homo sapiens OX=9606 GN=LLGL1 PE=1 SV=3	PF05434//PF12326//PF00400//PF06160//PF01275	TMEM9//N-glycosylation protein//WD domain, G-beta repeat//Septation ring formation regulator, EzrA//Myelin proteolipid protein (PLP or lipophilin)	GO:0034599//GO:0000921	cellular response to oxidative stress//septin ring assembly	GO:0005515	protein binding	GO:0005940//GO:0005789//GO:0016021	septin ring//endoplasmic reticulum membrane//integral component of membrane	KOG1983	Tomosyn and related SNARE-interacting proteins	UP	7.8134	1.9e-09	blast,frame:-2 start:5395 end:1118
Cluster-41647.6019	69	721	954	2	1	0	0.56	5.96	7.89	0.02	0.01	0	4406	--	--	--	--	--	--	--	--	--	--	--	--	--	--	P82295	278	7.1e-23	Prominin-like protein OS=Drosophila melanogaster OX=7227 GN=prominin-like PE=1 SV=1	PF05478	Prominin	--	--	--	--	GO:0016021	integral component of membrane	--	--	UP	9.1737	1.92e-09	blast,frame:2 start:578 end:4285
Cluster-41647.4967	137	245	647.32	2	2	7	4.33	7.7	20.44	0.06	0.06	0.22	1335	294464839	ADE77925.1	398	6.9e-36	unknown [Picea sitchensis]	--	--	--	--	--	-	-	-	http://www.genome.jp/dbget-bin/www_bget?ko:-	Q3E6P4	285	3.3e-24	F-box protein At2g02240 OS=Arabidopsis thaliana OX=3702 GN=At2g02240 PE=2 SV=1	PF00646//PF12937//PF06881	F-box domain//F-box-like//RNA polymerase II transcription factor SIII (Elongin) subunit A	GO:0006357	regulation of transcription by RNA polymerase II	GO:0005515	protein binding	GO:0005634//GO:0070449	nucleus//elongin complex	--	--	UP	6.4145	1.93e-09	estscan,start:331 end:474
Cluster-41647.8332	87	662	944	2	4	0	4.12	30.79	44.27	0.09	0.19	0	979	545706655	XP_005705644.1	555	3.1e-54	60S ribosomal protein L13e [Galdieria sulphuraria]	--	--	--	--	--	K02873	RP-L13e, RPL13	large subunit ribosomal protein L13e	http://www.genome.jp/dbget-bin/www_bget?ko:K02873	Q90Z10	542	3.8e-54	60S ribosomal protein L13 OS=Danio rerio OX=7955 GN=rpl13 PE=2 SV=3	PF01294	Ribosomal protein L13e	GO:0042254//GO:0006412	ribosome biogenesis//translation	GO:0003735	structural constituent of ribosome	GO:0005840	ribosome	KOG3295	60S Ribosomal protein L13	UP	8.1094	1.93e-09	blast,frame:2 start:110 end:763
Cluster-41647.6157	79	321	843	0	0	0	1.35	5.5	14.47	0	0	0	2249	--	--	--	--	--	--	--	--	--	--	--	--	--	--	--	--	--	--	--	--	--	--	--	--	--	--	--	--	UP	11.072	1.96e-09	estscan,start:1 end:2096
Cluster-41647.6712	61	531	679.99	0	0	0	1.66	14.42	18.54	0	0	0	1507	507108519	CDF32473.1	492	9.7e-47	peroxiredoxin, PRX3 [Chondrus crispus]	--	--	--	--	--	-	-	-	http://www.genome.jp/dbget-bin/www_bget?ko:-	O35244	488	1.1e-47	Peroxiredoxin-6 OS=Rattus norvegicus OX=10116 GN=Prdx6 PE=1 SV=3	PF03071//PF10417//PF02731//PF00578//PF08534//PF13911//PF01297	GNT-I family//C-terminal domain of 1-Cys peroxiredoxin//SKIP/SNW domain//AhpC/TSA family//Redoxin//AhpC/TSA antioxidant enzyme//Zinc-uptake complex component A periplasmic	GO:0000398//GO:0006486//GO:0030001//GO:0055114	mRNA splicing, via spliceosome//protein glycosylation//metal ion transport//oxidation-reduction process	GO:0016491//GO:0046872//GO:0008375//GO:0051920//GO:0016209	oxidoreductase activity//metal ion binding//acetylglucosaminyltransferase activity//peroxiredoxin activity//antioxidant activity	GO:0005681	spliceosomal complex	KOG0854	Alkyl hydroperoxide reductase, thiol specific antioxidant and related enzymes	UP	11.097	1.96e-09	blast,frame:-1 start:1201 end:548
Cluster-41647.3603	62	511	737	0	0	0	4.49	35.71	52.19	0	0	0	731	116792466	ABK26378.1	434	2.5e-40	unknown [Picea sitchensis]	--	--	--	--	--	K02966	RP-S19e, RPS19	small subunit ribosomal protein S19e	http://www.genome.jp/dbget-bin/www_bget?ko:K02966	P17074	481	3.4e-47	40S ribosomal protein S19 OS=Rattus norvegicus OX=10116 GN=Rps19 PE=2 SV=3	PF01090//PF02522	Ribosomal protein S19e//Aminoglycoside 3-N-acetyltransferase	GO:0042967//GO:0046677//GO:0042254//GO:0006412	obsolete acyl-carrier-protein biosynthetic process//response to antibiotic//ribosome biogenesis//translation	GO:0003735//GO:0046353	structural constituent of ribosome//aminoglycoside 3-N-acetyltransferase activity	GO:0005840	ribosome	KOG3411	40S ribosomal protein S19	UP	11.141	1.97e-09	blast,frame:3 start:213 end:692
Cluster-41647.11650	89	959	988	1	0	0	1.55	16.77	17.31	0.02	0	0	2209	1279792017	XP_022949102.1	422	1.9e-38	NAP1-related protein 2-like [Cucurbita moschata]	LC059421.1	LC059421	44	8.98e-11	Drosophila nasuta Set gene for set protein, partial cds, strain: VNS23	K11290	SET, TAF1, I2PP2A	template-activating factor I	http://www.genome.jp/dbget-bin/www_bget?ko:K11290	Q01105	612	6.6e-62	Protein SET OS=Homo sapiens OX=9606 GN=SET PE=1 SV=3	PF02517//PF00956//PF03176//PF07516	CPBP intramembrane metalloprotease//Nucleosome assembly protein (NAP)//MMPL family//SecA Wing and Scaffold domain	GO:0071586//GO:0006334//GO:0006508//GO:0017038	CAAX-box protein processing//nucleosome assembly//proteolysis//protein import	GO:0004197	cysteine-type endopeptidase activity	GO:0005634//GO:0016020	nucleus//membrane	KOG1508	DNA replication factor/protein phosphatase inhibitor SET/SPR-2	UP	10.81	2.02e-09	blast,frame:1 start:907 end:2172
Cluster-41647.5845	92	916.87	797	0	1	0	0.64	6.5	5.65	0	0.01	0	5099	--	--	--	--	--	XM_017999226.1	XM_017999226	105	2.57e-44	PREDICTED: Drosophila busckii lysine-specific demethylase 6A (LOC108608046), mRNA	--	--	--	--	O70546	1544	1.3e-169	Lysine-specific demethylase 6A OS=Mus musculus OX=10090 GN=Kdm6a PE=1 SV=2	PF00046//PF00157	Homeodomain//Pou domain - N-terminal to homeobox domain	GO:0006355	regulation of transcription, DNA-templated	GO:0003700//GO:0003677	DNA-binding transcription factor activity//DNA binding	GO:0005667	transcription regulator complex	--	--	UP	10.635	2.1e-09	blast,frame:-3 start:4740 end:3580|blast,frame:3 start:1494 end:3191
Cluster-41647.9125	258	490	841.02	38.99	17	10	12.97	24.16	41.83	1.88	0.85	0.5	937	116785812	ABK23871.1	464	1.1e-43	unknown [Picea sitchensis]	--	--	--	--	--	-	-	-	http://www.genome.jp/dbget-bin/www_bget?ko:-	Q9LQR0	343	4.3e-31	LOB domain-containing protein 1 OS=Arabidopsis thaliana OX=3702 GN=LBD1 PE=2 SV=1	--	--	--	--	--	--	--	--	--	--	UP	4.5942	2.13e-09	blast,frame:3 start:81 end:629
Cluster-41647.9787	88	598	986	4	1	0	6.47	42.39	70.84	0.28	0.07	0	724	326496204	BAJ94564.1	671	8.2e-68	predicted protein [Hordeum vulgare subsp. vulgare]	XM_023447946.1	XM_023447946	203	1.17e-99	PREDICTED: Lucilia cuprina 40S ribosomal protein S23 (LOC111685681), mRNA	K02973	RP-S23e, RPS23	small subunit ribosomal protein S23e	http://www.genome.jp/dbget-bin/www_bget?ko:K02973	Q6EV23	714	3.2e-74	40S ribosomal protein S23 OS=Papilio dardanus OX=77259 GN=RpS23 PE=2 SV=1	PF00164//PF09445	Ribosomal protein S12/S23//RNA cap guanine-N2 methyltransferase	GO:0006412//GO:0001510//GO:0042254//GO:0009452	translation//RNA methylation//ribosome biogenesis//7-methylguanosine RNA capping	GO:0008168//GO:0003735	methyltransferase activity//structural constituent of ribosome	GO:0005840	ribosome	KOG1749	40S ribosomal protein S23	UP	8.4116	2.17e-09	blast,frame:-1 start:547 end:62
Cluster-41647.9678	57.8	619.97	853	0	0	0	1.36	14.58	20.11	0	0	0	1704	--	--	--	--	--	--	--	--	--	--	--	--	--	--	O17389	143	1.2e-07	Thymosin beta OS=Caenorhabditis elegans OX=6239 GN=tth-1 PE=1 SV=2	PF01290//PF02205	Thymosin beta-4 family//WH2 motif	GO:0007015	actin filament organization	GO:0003785//GO:0003779	actin monomer binding//actin binding	--	--	--	--	UP	11.365	2.2e-09	estscan,start:909 end:559; minus strand
Cluster-41647.31093	86	996	1016	0	1	0	0.35	4.06	4.14	0	0	0	8684	--	--	--	--	--	--	--	--	--	--	--	--	--	--	B3MFV7	212	6.3e-15	Latrophilin Cirl OS=Drosophila ananassae OX=7217 GN=Cirl PE=3 SV=1	PF17112//PF03249//PF00002//PF13903	Mitochondrial import receptor subunit Tom6, fungal//Type specific antigen//7 transmembrane receptor (Secretin family)//PMP-22/EMP/MP20/Claudin tight junction	GO:0007186//GO:0030150	G protein-coupled receptor signaling pathway//protein import into mitochondrial matrix	GO:0004930	G protein-coupled receptor activity	GO:0016021//GO:0005742	integral component of membrane//mitochondrial outer membrane translocase complex	KOG4193	G protein-coupled receptors	UP	10.853	2.23e-09	blast,frame:-1 start:5765 end:1530
Cluster-41647.9797	113	867	1189	0	2	0	2.47	19.01	26.14	0	0.04	0	1810	326503912	BAK02742.1	2023	3.5e-224	predicted protein [Hordeum vulgare subsp. vulgare]	NM_001292686.1	JX052998	147	4.05e-68	Callorhinchus milii chaperonin containing TCP1 subunit 5 (cct5), mRNA >gb|JX052998.1| Callorhinchus milii clone P29G15.Kidney.k16 mRNA sequence	K09497	CCT5	T-complex protein 1 subunit epsilon	http://www.genome.jp/dbget-bin/www_bget?ko:K09497	Q68FQ0	2068	8e-231	T-complex protein 1 subunit epsilon OS=Rattus norvegicus OX=10116 GN=Cct5 PE=1 SV=1	PF00118	TCP-1/cpn60 chaperonin family	--	--	GO:0005524	ATP binding	--	--	KOG0357	Chaperonin complex component, TCP-1 epsilon subunit (CCT5)	UP	10.011	2.25e-09	blast,frame:-2 start:1746 end:55
Cluster-41647.9620	115.02	883.56	1362.21	1	5	0	2.23	17.23	26.63	0.02	0.1	0	2005	530737479	EQC35721.1	1814	6.6e-200	protein transporter Sec61 subunit alpha [Saprolegnia diclina VS20]	XM_022322710.1	XM_022322710	432	0	PREDICTED: Myzus persicae protein transport protein Sec61 subunit alpha (LOC111039276), mRNA	K10956	SEC61A	protein transport protein SEC61 subunit alpha	http://www.genome.jp/dbget-bin/www_bget?ko:K10956	Q98SN8	2229	1.9e-249	Protein transport protein Sec61 subunit alpha isoform B OS=Oncorhynchus mykiss OX=8022 GN=sec61ab PE=2 SV=3	PF00344	SecY translocase	GO:0015031	protein transport	--	--	GO:0016020	membrane	KOG1373	Transport protein Sec61, alpha subunit	UP	8.5695	2.26e-09	blast,frame:1 start:391 end:1836
Cluster-41647.6590	60	488	468	0	0	0	1.72	13.96	13.44	0	0	0	1443	697994146	AIT70196.1	740	1.6e-75	malate dehydrogenase [Symphyocladia latiuscula]	--	--	--	--	--	K00025	MDH1	malate dehydrogenase	http://www.genome.jp/dbget-bin/www_bget?ko:K00025	Q6DIY9	754	1.5e-78	Malate dehydrogenase, cytoplasmic OS=Xenopus tropicalis OX=8364 GN=mdh1 PE=2 SV=1	PF02866//PF00056	lactate/malate dehydrogenase, alpha/beta C-terminal domain//lactate/malate dehydrogenase, NAD binding domain	GO:0055114	oxidation-reduction process	GO:0016616//GO:0016491	oxidoreductase activity, acting on the CH-OH group of donors, NAD or NADP as acceptor//oxidoreductase activity	--	--	KOG1496	Malate dehydrogenase	UP	10.768	2.27e-09	blast,frame:2 start:281 end:1285
Cluster-41647.33986	84	688	976	1	1	0	0.62	5.16	7.32	0.01	0.01	0	4832	--	--	--	--	--	--	--	--	--	--	--	--	--	--	Q8SY33	238	3.4e-18	Protein Gawky OS=Drosophila melanogaster OX=7227 GN=gw PE=1 SV=1	--	--	--	--	--	--	--	--	--	--	UP	9.7365	2.27e-09	blast,frame:1 start:1108 end:4749
Cluster-41647.4167	104	807	1019.44	6	3	0	1.76	13.74	17.39	0.1	0.05	0	2262	971505342	GAQ92864.1	752	1e-76	Serine Threonine protein kinase [Klebsormidium nitens]	--	--	--	--	--	K08835	OXSR1, STK39	serine/threonine-protein kinase OSR1/STK39	http://www.genome.jp/dbget-bin/www_bget?ko:K08835	Q863I2	1088	4.3e-117	Serine/threonine-protein kinase OSR1 OS=Sus scrofa OX=9823 GN=OXSR1 PE=2 SV=1	PF07714//PF00572//PF00069	Protein tyrosine and serine/threonine kinase//Ribosomal protein L13//Protein kinase domain	GO:0006468//GO:0042254//GO:0006412	protein phosphorylation//ribosome biogenesis//translation	GO:0005524//GO:0003735//GO:0004672	ATP binding//structural constituent of ribosome//protein kinase activity	GO:0005840	ribosome	KOG0582	Ste20-like serine/threonine protein kinase	UP	7.7679	2.35e-09	blast,frame:3 start:27 end:1292
Cluster-41647.18481	110	894	932	0	2	0	1.85	15.16	15.83	0	0.03	0	2270	--	--	--	--	--	--	--	--	--	--	--	--	--	--	--	--	--	--	--	--	--	--	--	--	--	--	--	--	UP	9.8437	2.35e-09	estscan,start:1242 end:2204
Cluster-41647.5289	70	518	581	3	2	0	0.82	6.13	6.88	0.03	0.02	0	3149	971512972	GAQ85231.1	231	3.7e-16	Cold shock domain-containing protein [Klebsormidium nitens]	--	--	--	--	--	-	-	-	http://www.genome.jp/dbget-bin/www_bget?ko:-	P18395	527	6.8e-52	Cold shock domain-containing protein E1 OS=Rattus norvegicus OX=10116 GN=Csde1 PE=2 SV=1	PF00798//PF00313	Arenavirus glycoprotein//'Cold-shock' DNA-binding domain	--	--	GO:0003676	nucleic acid binding	GO:0019031	viral envelope	--	--	UP	7.8601	2.37e-09	blast,frame:1 start:511 end:2778
Cluster-41647.23502	1371	1943	1949	268	209	78	17.99	25.72	25.82	3.46	2.8	1.04	2842	148908705	ABR17460.1	2025	3.2e-224	unknown [Picea sitchensis]	EF677650.1	EF677650	738	0	Picea sitchensis clone WS02772_G01 unknown mRNA	-	-	-	http://www.genome.jp/dbget-bin/www_bget?ko:-	P33543	924	5.6e-98	Putative kinase-like protein TMKL1 OS=Arabidopsis thaliana OX=3702 GN=TMKL1 PE=1 SV=1	PF07714//PF13855//PF00069//PF00560//PF15756//PF13516	Protein tyrosine and serine/threonine kinase//Leucine rich repeat//Protein kinase domain//Leucine Rich Repeat//Small Novel Rich in Cartilage//Leucine Rich repeat	GO:0006468//GO:0051216	protein phosphorylation//cartilage development	GO:0005524//GO:0004672//GO:0005515	ATP binding//protein kinase activity//protein binding	--	--	--	--	UP	3.2309	2.39e-09	blast,frame:3 start:267 end:2357
Cluster-41647.7810	98	820	1080	2	5	0	1.91	16.08	21.23	0.04	0.1	0	1995	326506056	BAJ91267.1	999	2.1e-105	predicted protein [Hordeum vulgare subsp. vulgare]	XM_030670981.1	XM_030670981	276	8.71e-140	PREDICTED: Rhodamnia argentea protein krasavietz-like (LOC115738374), mRNA	-	-	-	http://www.genome.jp/dbget-bin/www_bget?ko:-	Q9VNE2	981	9.7e-105	Protein krasavietz OS=Drosophila melanogaster OX=7227 GN=kra PE=1 SV=1	PF02020//PF09177	eIF4-gamma/eIF5/eIF2-epsilon//Syntaxin 6, N-terminal	GO:0048193	Golgi vesicle transport	GO:0005515	protein binding	GO:0016020	membrane	KOG2297	Predicted translation factor, contains W2 domain	UP	8.1212	2.39e-09	blast,frame:-2 start:1637 end:354
Cluster-41647.5108	159	195	449	19	11	13	3.14	3.86	8.91	0.37	0.22	0.26	1978	1278994890	XP_022858495.1	442	8e-41	UPF0481 protein At3g47200-like [Olea europaea var. sylvestris]	--	--	--	--	--	-	-	-	http://www.genome.jp/dbget-bin/www_bget?ko:-	P0C897	218	2.9e-16	Putative UPF0481 protein At3g02645 OS=Arabidopsis thaliana OX=3702 GN=At3g02645 PE=3 SV=1	--	--	--	--	--	--	--	--	--	--	UP	4.1714	2.39e-09	blast,frame:-1 start:1516 end:305
Cluster-41647.8815	88	819	1189	1	0	0	0.68	6.46	9.37	0.01	0	0	4610	1276239559	PIN01368.1	240	5e-17	Box H/ACA snoRNP component, involved in ribosomal RNA pseudouridinylation [Handroanthus impetiginosus]	--	--	--	--	--	K11129	NHP2, NOLA2	H/ACA ribonucleoprotein complex subunit 2	http://www.genome.jp/dbget-bin/www_bget?ko:K11129	Q9V3U2	317	2.2e-27	H/ACA ribonucleoprotein complex subunit 2-like protein OS=Drosophila melanogaster OX=7227 GN=NHP2 PE=1 SV=1	PF00041//PF01567//PF08228	Fibronectin type III domain//Hantavirus glycoprotein G1//RNase P subunit Pop3	GO:0008033//GO:0030683//GO:0006364	tRNA processing//mitigation of host immune response by virus//rRNA processing	GO:0005515	protein binding	GO:0019012	virion	KOG3167	Box H/ACA snoRNP component, involved in ribosomal RNA pseudouridinylation	UP	10.857	2.39e-09	estscan,start:1188 end:3686
Cluster-41647.31714	114	1336	1140	0	3	0	6.86	78.31	67.54	0	0.18	0	826	1191657979	OTG09949.1	522	1.8e-50	putative histone H2A variant 1 [Helianthus annuus]	XM_027020173.1	XM_027020173	99	8.71e-42	PREDICTED: Electrophorus electricus histone H2A.V (LOC113583701), mRNA	K11251	H2A	histone H2A	http://www.genome.jp/dbget-bin/www_bget?ko:K11251	P08985	590	8.8e-60	Histone H2A.v OS=Drosophila melanogaster OX=7227 GN=His2Av PE=1 SV=2	PF00125	Core histone H2A/H2B/H3/H4	--	--	GO:0003677	DNA binding	GO:0000786	nucleosome	KOG1757	Histone 2A	UP	9.6732	2.41e-09	blast,frame:-2 start:564 end:151
Cluster-41647.8914	115	1101	1320	4	6	0	1.09	10.58	12.68	0.04	0.06	0	3826	326533288	BAJ93616.1	1755	8.7e-193	predicted protein [Hordeum vulgare subsp. vulgare]	XM_015580347.1	XM_015580347	173	3.05e-82	PREDICTED: Dufourea novaeangliae putative ATP-dependent RNA helicase me31b (LOC107191327), transcript variant X2, mRNA	K12614	DDX6, RCK, DHH1	ATP-dependent RNA helicase DDX6/DHH1	http://www.genome.jp/dbget-bin/www_bget?ko:K12614	P23128	1693	5.1e-187	ATP-dependent RNA helicase me31b OS=Drosophila melanogaster OX=7227 GN=me31B PE=1 SV=3	PF04851//PF00270//PF04037	Type III restriction enzyme, res subunit//DEAD/DEAH box helicase//Domain of unknown function (DUF382)	--	--	GO:0003677//GO:0003676//GO:0005524//GO:0016787	DNA binding//nucleic acid binding//ATP binding//hydrolase activity	GO:0005634	nucleus	KOG0326	ATP-dependent RNA helicase	UP	7.9718	2.42e-09	estscan,start:3569 end:2079; minus strand
Cluster-41647.28273	4	5	0	163	153	67	0.06	0.07	0	2.26	2.2	0.96	2661	1276252115	PIN10642.1	573	7e-56	hypothetical protein CDL12_16763 [Handroanthus impetiginosus]	--	--	--	--	--	-	-	-	http://www.genome.jp/dbget-bin/www_bget?ko:-	Q9XIN0	484	5.5e-47	Transcription factor LHW OS=Arabidopsis thaliana OX=3702 GN=LHW PE=1 SV=1	PF00010	Helix-loop-helix DNA-binding domain	--	--	GO:0046983	protein dimerization activity	--	--	--	--	DOWN	-5.4538	2.44e-09	estscan,start:2040 end:193; minus strand
Cluster-41647.5508	73	466	728	3	2	0	0.98	6.28	9.82	0.04	0.03	0	2794	--	--	--	--	--	--	--	--	--	--	--	--	--	--	--	--	--	--	--	--	--	--	--	--	--	--	--	--	UP	7.9823	2.51e-09	estscan,start:2574 end:59; minus strand
Cluster-41647.9790	152	1606	2674	9	3	0	2.54	27.03	45.07	0.15	0.05	0	2286	326533846	BAJ93696.1	2483	2e-277	predicted protein [Hordeum vulgare subsp. vulgare]	XM_023452191.1	XM_023452191	380	0	PREDICTED: Lucilia cuprina heat shock 70 kDa protein cognate 3 (LOC111689731), mRNA	K09490	HSPA5, BIP	heat shock 70kDa protein 5	http://www.genome.jp/dbget-bin/www_bget?ko:K09490	P11021	2497	1.8e-280	Endoplasmic reticulum chaperone BiP OS=Homo sapiens OX=9606 GN=HSPA5 PE=1 SV=2	PF00773//PF08287//PF05504//PF01968	RNB domain//Spc19//Spore germination B3/ GerAC like, C-terminal//Hydantoinase/oxoprolinase	GO:0008608//GO:0009847//GO:0051252	attachment of spindle microtubules to kinetochore//spore germination//regulation of RNA metabolic process	GO:0016787//GO:0003723//GO:0004540	hydrolase activity//RNA binding//ribonuclease activity	GO:0042729//GO:0005876//GO:0016020	DASH complex//spindle microtubule//membrane	KOG0100	Molecular chaperones GRP78/BiP/KAR2, HSP70 superfamily	UP	8.5859	2.52e-09	blast,frame:1 start:214 end:2214
Cluster-41647.18859	73	522	741	2	3	0	0.93	6.69	9.51	0.03	0.04	0	2926	428186462	EKX55312.1	1178	5.4e-126	hypothetical protein GUITHDRAFT_156771 [Guillardia theta CCMP2712]	XM_030681866.1	XM_030681866	527	0	PREDICTED: Rhodamnia argentea glutamate dehydrogenase, mitochondrial-like (LOC115746158), mRNA	K00261	GLUD1_2, gdhA	glutamate dehydrogenase (NAD(P)+)	http://www.genome.jp/dbget-bin/www_bget?ko:K00261	P54385	2126	2.4e-237	Glutamate dehydrogenase, mitochondrial OS=Drosophila melanogaster OX=7227 GN=Gdh PE=1 SV=2	PF15953//PF02826//PF00208//PF02812	Putative propanediol utilisation//D-isomer specific 2-hydroxyacid dehydrogenase, NAD binding domain//Glutamate/Leucine/Phenylalanine/Valine dehydrogenase//Glu/Leu/Phe/Val dehydrogenase, dimerisation domain	GO:0006520//GO:0055114	cellular amino acid metabolic process//oxidation-reduction process	GO:0005198//GO:0016491//GO:0051287	structural molecule activity//oxidoreductase activity//NAD binding	--	--	KOG2250	Glutamate/leucine/phenylalanine/valine dehydrogenases	UP	8.0348	2.55e-09	blast,frame:-2 start:2472 end:553
Cluster-41647.17961	191	373	301	26	12	4	13.26	25.05	20.47	1.71	0.82	0.27	751	--	--	--	--	--	--	--	--	--	--	--	--	--	--	--	--	--	--	--	--	--	--	--	--	--	--	--	--	UP	4.3678	2.55e-09	--
Cluster-41647.33776	86	882	1228.91	5	2	0	0.4	4.16	5.78	0.02	0.01	0	7553	1605312638	TFJ81363.1	1323	2.1e-142	hypothetical protein NSK_007324 [Nannochloropsis salina CCMP1776]	--	--	--	--	--	K00252	GCDH, gcdH	glutaryl-CoA dehydrogenase	http://www.genome.jp/dbget-bin/www_bget?ko:K00252	Q2KHZ9	1412	3.9e-154	Glutaryl-CoA dehydrogenase, mitochondrial OS=Bos taurus OX=9913 GN=GCDH PE=2 SV=1	PF02770//PF03522//PF10240//PF01080//PF07655//PF03348//PF00441//PF14721//PF12326//PF12090//PF06459//PF05091//PF02771//PF12351//PF13965//PF01728//PF02932	Acyl-CoA dehydrogenase, middle domain//Solute carrier family 12//Multivesicular body subunit 12//Presenilin//Secretin N-terminal domain//Serine incorporator (Serinc)//Acyl-CoA dehydrogenase, C-terminal domain//Apoptosis-inducing factor, mitochondrion-associated, C-term//N-glycosylation protein//Spt20 family//Ryanodine Receptor TM 4-6//Eukaryotic translation initiation factor 3 subunit 7 (eIF-3)//…	GO:0034599//GO:0006874//GO:0055114//GO:0016485//GO:0006811//GO:0032259//GO:0033227//GO:0009297//GO:0015931//GO:0006446//GO:0006816//GO:0032220	cellular response to oxidative stress//cellular calcium ion homeostasis//oxidation-reduction process//protein processing//ion transport//methylation//dsRNA transport//pilus assembly//nucleobase-containing compound transport//regulation of translational initiation//calcium ion transport//plasma membrane fusion involved in cytogamy	GO:0051033//GO:0003712//GO:0050660//GO:0004190//GO:0008168//GO:0005219//GO:0016627//GO:0003743//GO:0046983//GO:0022857	RNA transmembrane transporter activity//transcription coregulator activity//flavin adenine dinucleotide binding//aspartic-type endopeptidase activity//methyltransferase activity//ryanodine-sensitive calcium-release channel activity//oxidoreductase activity, acting on the CH-CH group of donors//translation initiation factor activity//protein dimerization activity//transmembrane transporter activity	GO:0019867//GO:0000124//GO:0005737//GO:0000813//GO:0016020//GO:0005840//GO:0005667//GO:0005622//GO:0005852//GO:0005789//GO:0016021	outer membrane//SAGA complex//cytoplasm//ESCRT I complex//membrane//ribosome//transcription regulator complex//intracellular//eukaryotic translation initiation factor 3 complex//endoplasmic reticulum membrane//integral component of membrane	KOG0138	Glutaryl-CoA dehydrogenase	UP	8.3219	2.58e-09	blast,frame:-3 start:3717 end:2416
Cluster-41647.6572	93	1190	1306	5	4	0	1.46	18.86	20.72	0.08	0.06	0	2413	326501772	BAK02675.1	926	7.4e-97	predicted protein [Hordeum vulgare subsp. vulgare]	XM_031699293.1	XM_031699293	53	9.75e-16	PREDICTED: Actinia tenebrosa cathepsin L1-like (LOC116292054), mRNA	-	-	-	http://www.genome.jp/dbget-bin/www_bget?ko:-	Q95029	1068	9.6e-115	Cathepsin L OS=Drosophila melanogaster OX=7227 GN=Cp1 PE=2 SV=2	PF16685//PF04995//PF07962//PF02976//PF15163//PF03051//PF00112	zinc RING finger of MSL2//Heme exporter protein D (CcmD)//Replication Fork Protection Component Swi3//DNA mismatch repair enzyme MutH//Meiosis-expressed//Peptidase C1-like family//Papain family cysteine protease	GO:0006974//GO:0006508//GO:0048478//GO:0017004//GO:0015886	cellular response to DNA damage stimulus//proteolysis//replication fork protection//cytochrome complex assembly//heme transport	GO:0004197//GO:0008234//GO:0061630//GO:0003677//GO:0004519	cysteine-type endopeptidase activity//cysteine-type peptidase activity//ubiquitin protein ligase activity//DNA binding//endonuclease activity	GO:0005634//GO:0016021	nucleus//integral component of membrane	KOG1543	Cysteine proteinase Cathepsin L	UP	8.1759	2.58e-09	blast,frame:3 start:606 end:1679
Cluster-41647.37130	4	1	3	86	54	69	0.11	0.03	0.08	2.28	1.49	1.89	1505	1305250333	PKI63499.1	139	8.3e-06	hypothetical protein CRG98_016166, partial [Punica granatum]	--	--	--	--	--	--	--	--	--	--	--	--	--	--	--	--	--	--	--	--	--	--	--	DOWN	-4.778	2.58e-09	estscan,start:893 end:103; minus strand
Cluster-41647.5646	110	780	966	1	5	0	1.18	8.43	10.44	0.01	0.05	0	3428	971514168	GAQ84009.1	946	5e-99	ATP-dependent RNA helicase DDX5/DBP2 [Klebsormidium nitens]	XM_023375823.1	XM_023375823	80	1.36e-30	PREDICTED: Centruroides sculpturatus probable ATP-dependent RNA helicase DDX17 (LOC111631562), transcript variant X3, mRNA	K12823	DDX5, DBP2	ATP-dependent RNA helicase DDX5/DBP2	http://www.genome.jp/dbget-bin/www_bget?ko:K12823	P17844	1046	4.8e-112	Probable ATP-dependent RNA helicase DDX5 OS=Homo sapiens OX=9606 GN=DDX5 PE=1 SV=1	PF00270//PF11808//PF06553//PF12404//PF04851	DEAD/DEAH box helicase//Phosphate regulon sensor protein PhoR//BNIP3//Peptidase//Type III restriction enzyme, res subunit	GO:0006508//GO:0016310//GO:0000160//GO:0006470//GO:0043065	proteolysis//phosphorylation//phosphorelay signal transduction system//protein dephosphorylation//positive regulation of apoptotic process	GO:0004721//GO:0016787//GO:0003676//GO:0003677//GO:0005524//GO:0030145//GO:0008235//GO:0004177//GO:0000155	phosphoprotein phosphatase activity//hydrolase activity//nucleic acid binding//DNA binding//ATP binding//manganese ion binding//metalloexopeptidase activity//aminopeptidase activity//phosphorelay sensor kinase activity	GO:0005740//GO:0005737//GO:0016021//GO:0009365	mitochondrial envelope//cytoplasm//integral component of membrane//protein histidine kinase complex	KOG0331	ATP-dependent RNA helicase	UP	8.2185	2.59e-09	blast,frame:-2 start:2023 end:935
Cluster-46103.0	59	416	522	0	0	0	0.75	5.36	6.73	0	0	0	2912	326499273	BAK06127.1	476	1.3e-44	predicted protein [Hordeum vulgare subsp. vulgare]	XM_014383065.2	XM_014383065	75	6.95e-28	PREDICTED: Trichogramma pretiosum ATP synthase subunit gamma, mitochondrial (LOC106660186), transcript variant X3, mRNA	K02136	ATPeF1G, ATP5C1, ATP3	F-type H+-transporting ATPase subunit gamma	http://www.genome.jp/dbget-bin/www_bget?ko:K02136	O01666	714	1.3e-73	ATP synthase subunit gamma, mitochondrial OS=Drosophila melanogaster OX=7227 GN=ATPsyngamma PE=2 SV=2	PF00313//PF14369//PF00894//PF00231//PF07655//PF00096//PF02166	'Cold-shock' DNA-binding domain//zinc-ribbon//Luteovirus coat protein//ATP synthase//Secretin N-terminal domain//Zinc finger, C2H2 type//Androgen receptor	GO:0006355//GO:0007165//GO:0015986//GO:0009297//GO:0030521	regulation of transcription, DNA-templated//signal transduction//ATP synthesis coupled proton transport//pilus assembly//androgen receptor signaling pathway	GO:0003676//GO:0046933//GO:0004879//GO:0005198//GO:0005496//GO:0061630//GO:0003677	nucleic acid binding//proton-transporting ATP synthase activity, rotational mechanism//nuclear receptor activity//structural molecule activity//steroid binding//ubiquitin protein ligase activity//DNA binding	GO:0019028//GO:0045261//GO:0019867//GO:0045259//GO:0005634	viral capsid//proton-transporting ATP synthase complex, catalytic core F(1)//outer membrane//proton-transporting ATP synthase complex//nucleus	KOG1531	F0F1-type ATP synthase, gamma subunit	UP	10.745	2.71e-09	blast,frame:2 start:209 end:1129
Cluster-41647.15605	396.16	1031.73	1015.66	90.33	36.96	41.02	20.22	51.61	51.26	4.41	1.87	2.07	927	1102775731	XP_019054706.1	482	8.7e-46	PREDICTED: LOW QUALITY PROTEIN: uncharacterized protein LOC104605769 [Nelumbo nucifera]	--	--	--	--	--	-	-	-	http://www.genome.jp/dbget-bin/www_bget?ko:-	O64477	402	6.2e-38	G-type lectin S-receptor-like serine/threonine-protein kinase At2g19130 OS=Arabidopsis thaliana OX=3702 GN=At2g19130 PE=2 SV=1	PF00954//PF06247	S-locus glycoprotein domain//Pvs28 EGF domain	GO:0048544	recognition of pollen	--	--	GO:0009986//GO:0016020	cell surface//membrane	--	--	UP	3.8336	2.73e-09	blast,frame:-1 start:927 end:1
Cluster-41647.10758	185	327	270	32	14	7	4.99	8.8	7.29	0.84	0.38	0.19	1519	--	--	--	--	--	--	--	--	--	--	-	-	-	http://www.genome.jp/dbget-bin/www_bget?ko:-	--	--	--	--	PF14369	zinc-ribbon	--	--	GO:0061630	ubiquitin protein ligase activity	--	--	--	--	UP	3.8776	2.93e-09	estscan,start:690 end:280; minus strand
Cluster-41647.20091	88	707	795	1	0	0	0.68	5.51	6.2	0.01	0	0	4657	--	--	--	--	--	--	--	--	--	--	--	--	--	--	Q8SY33	181	1.3e-11	Protein Gawky OS=Drosophila melanogaster OX=7227 GN=gw PE=1 SV=1	--	--	--	--	--	--	--	--	--	--	UP	10.455	2.97e-09	blast,frame:1 start:712 end:3570
Cluster-36374.0	56	512	691	0	0	0	1.48	13.55	18.36	0	0	0	1540	1378163506	XP_024581437.1	1506	2.6e-164	serine threonine-protein phosphatase pp1 [Plasmopara halstedii]	XM_029072058.1	XM_029072058	299	1.1e-152	PREDICTED: Ornithorhynchus anatinus protein phosphatase 1 catalytic subunit beta (PPP1CB), mRNA	K06269	PPP1C	serine/threonine-protein phosphatase PP1 catalytic subunit	http://www.genome.jp/dbget-bin/www_bget?ko:K06269	Q6GQL2	1595	4.8e-176	Serine/threonine-protein phosphatase PP1-beta catalytic subunit OS=Xenopus laevis OX=8355 GN=ppp1cb PE=2 SV=1	PF00149//PF03275	Calcineurin-like phosphoesterase//UDP-galactopyranose mutase	--	--	GO:0008767//GO:0016787	UDP-galactopyranose mutase activity//hydrolase activity	--	--	KOG0374	Serine/threonine specific protein phosphatase PP1, catalytic subunit	UP	11.082	2.99e-09	blast,frame:1 start:271 end:1251
Cluster-41647.27099	302	235	1566	13	12	9	4.32	3.39	22.62	0.18	0.18	0.13	2627	--	--	--	--	--	--	--	--	--	--	--	--	--	--	--	--	--	--	PF04673	Polyketide synthesis cyclase	GO:0030639	polyketide biosynthetic process	--	--	--	--	--	--	UP	5.9062	3.1e-09	estscan,start:1 end:214
Cluster-41647.6437	63	328	585.65	0	0	0	1.53	7.98	14.3	0	0	0	1654	--	--	--	--	--	--	--	--	--	--	--	--	--	--	--	--	--	--	--	--	--	--	--	--	--	--	--	--	UP	10.72	3.12e-09	estscan,start:302 end:1021
Cluster-41647.5577	67	385	518.02	2	2	0	0.64	3.72	5.01	0.02	0.02	0	3801	326501236	BAJ98849.1	665	2.1e-66	predicted protein [Hordeum vulgare subsp. vulgare]	XM_030686277.1	XM_030686277	554	0	PREDICTED: Rhodamnia argentea guanine nucleotide-binding protein G(s) subunit alpha-like (LOC115749448), mRNA	K19729	GNAT3	guanine nucleotide-binding protein G(t) subunit alpha 3	http://www.genome.jp/dbget-bin/www_bget?ko:K19729	O16118	1663	1.5e-183	Guanine nucleotide-binding protein G(s) subunit alpha OS=Homarus americanus OX=6706 PE=2 SV=1	PF06645//PF00503//PF00025//PF00009//PF04670	Microsomal signal peptidase 12 kDa subunit (SPC12)//G-protein alpha subunit//ADP-ribosylation factor family//Elongation factor Tu GTP binding domain//Gtr1/RagA G protein conserved region	GO:0007186//GO:0006465	G protein-coupled receptor signaling pathway//signal peptide processing	GO:0008233//GO:0031683//GO:0005525//GO:0003924//GO:0019001	peptidase activity//G-protein beta/gamma-subunit complex binding//GTP binding//GTPase activity//guanyl nucleotide binding	GO:0016021//GO:0005787	integral component of membrane//signal peptidase complex	KOG0099	G protein subunit Galphas, small G protein superfamily	UP	7.897	3.14e-09	blast,frame:-3 start:2377 end:1202
Cluster-41647.20732	1025.04	1860.6	2649.93	209.09	76.97	120	29.56	53.48	76.49	5.87	2.24	3.48	1437	383134004	AFG47959.1	221	2.5e-15	hypothetical protein UMN_CL390Contig1_03, partial [Pinus taeda]	AK410404.1	AK410404	121	9.09e-54	Cryptomeria japonica mRNA, clone: CLFL006_D22, expressed in needles	-	-	-	http://www.genome.jp/dbget-bin/www_bget?ko:-	Q9LUV2	170	7.7e-11	Stress-response A/B barrel domain-containing protein HS1 OS=Arabidopsis thaliana OX=3702 GN=HS1 PE=1 SV=1	--	--	--	--	--	--	--	--	--	--	UP	3.7301	3.15e-09	blast,frame:-1 start:450 end:166
Cluster-41647.31337	69	1263	1497.01	0	1	0	1.72	31.52	37.49	0	0.03	0	1619	--	--	--	--	--	--	--	--	--	--	--	--	--	--	--	--	--	--	--	--	--	--	--	--	--	--	--	--	UP	11.287	3.16e-09	estscan,start:449 end:1342
Cluster-41647.9206	132	865.91	978	7	1	0	1.26	8.38	9.46	0.07	0.01	0	3800	--	--	--	--	--	--	--	--	--	--	--	--	--	--	--	--	--	--	--	--	--	--	--	--	--	--	--	--	UP	7.9998	3.25e-09	estscan,start:2990 end:2464; minus strand
Cluster-41647.33433	75	724	1098	1	1	0	1.06	10.28	15.61	0.01	0.01	0	2665	1027590053	AND95770.1	520	9.8e-50	Delta(3,5)-delta(2,4)-dienoyl-CoA isomerase, partial [Prorocentrum minimum]	--	--	--	--	--	K12663	ECH1	Delta(3,5)-Delta(2,4)-dienoyl-CoA isomerase	http://www.genome.jp/dbget-bin/www_bget?ko:K12663	O35459	645	1.2e-65	Delta(3,5)-Delta(2,4)-dienoyl-CoA isomerase, mitochondrial OS=Mus musculus OX=10090 GN=Ech1 PE=1 SV=1	PF00378//PF08926//PF16113	Enoyl-CoA hydratase/isomerase//Domain of unknown function (DUF1908)//Enoyl-CoA hydratase/isomerase	GO:0006552//GO:0006550//GO:0009069//GO:0016310//GO:0019482//GO:0006468//GO:0006574	leucine catabolic process//isoleucine catabolic process//serine family amino acid metabolic process//phosphorylation//beta-alanine metabolic process//protein phosphorylation//valine catabolic process	GO:0003860//GO:0003824//GO:0005524//GO:0000287//GO:0004674	3-hydroxyisobutyryl-CoA hydrolase activity//catalytic activity//ATP binding//magnesium ion binding//protein serine/threonine kinase activity	--	--	KOG1681	Enoyl-CoA isomerase	UP	9.8573	3.29e-09	blast,frame:3 start:927 end:2147
Cluster-41647.31467	57	387	440	0	0	0	0.49	3.35	3.8	0	0	0	4225	326502930	BAJ99093.1	161	6.6e-08	predicted protein, partial [Hordeum vulgare subsp. vulgare]	AB506667.1	AB506667	77	7.82e-29	Harmonia axyridis HaUSP-1 mRNA for ultraspiracle 1 isoform, complete cds	K10882	EME1, MMS4	crossover junction endonuclease EME1	http://www.genome.jp/dbget-bin/www_bget?ko:K10882	P19793	799	2.6e-83	Retinoic acid receptor RXR-alpha OS=Homo sapiens OX=9606 GN=RXRA PE=1 SV=1	PF01956//PF00105//PF05680//PF02732	Integral membrane protein EMC3/TMCO1-like//Zinc finger, C4 type (two domains)//ATP synthase E chain//ERCC4 domain	GO:0015986//GO:0006355	ATP synthesis coupled proton transport//regulation of transcription, DNA-templated	GO:0003700//GO:0003677//GO:0004518//GO:0008270//GO:0043565//GO:0015078	DNA-binding transcription factor activity//DNA binding//nuclease activity//zinc ion binding//sequence-specific DNA binding//proton transmembrane transporter activity	GO:0042025//GO:0005667//GO:0016020//GO:0000276	host cell nucleus//transcription regulator complex//membrane//mitochondrial proton-transporting ATP synthase complex, coupling factor F(o)	--	--	UP	10.57	3.33e-09	blast,frame:-2 start:3411 end:1939
Cluster-41647.7369	69	494	787	2	1	0	0.58	4.21	6.7	0.02	0.01	0	4285	1377605849	GBG26612.1	792	4.5e-81	Alpha-actinin-1 [Hondaea fermentalgiana]	XM_014923958.1	XM_014923958	262	1.14e-131	PREDICTED: Octopus bimaculoides alpha-actinin, sarcomeric-like (LOC106875711), transcript variant X1, mRNA	K16465	CETN1	centrin-1	http://www.genome.jp/dbget-bin/www_bget?ko:K16465	L7UZ85	3559	0	Alpha-actinin OS=Dermatophagoides farinae OX=6954 PE=1 SV=1	PF13499//PF13405//PF00435//PF00036//PF00307	EF-hand domain pair//EF-hand domain//Spectrin repeat//EF hand//Calponin homology (CH) domain	--	--	GO:0005515//GO:0005509	protein binding//calcium ion binding	--	--	KOG0035	Ca2+-binding actin-bundling protein (actinin), alpha chain (EF-Hand protein superfamily)	UP	8.804	3.34e-09	blast,frame:-3 start:3776 end:834
Cluster-41647.32160	27	3237.94	2803	0	0	0	0.23	27.39	23.71	0	0	0	4312	--	--	--	--	--	--	--	--	--	--	--	--	--	--	--	--	--	--	PF01372	Melittin	GO:0045859	regulation of protein kinase activity	GO:0004860	protein kinase inhibitor activity	GO:0005576	extracellular region	--	--	UP	13.345	3.37e-09	estscan,start:1499 end:4312
Cluster-41647.20115	3244.41	1943	8077	231	161	56	106.05	63.12	263.7	7.32	5.3	1.83	1299	294461185	ADE76156.1	1124	4.4e-120	unknown [Picea sitchensis]	XM_009371105.2	XM_009371105	78	6.56e-30	PREDICTED: Pyrus x bretschneideri AAA-ATPase ASD, mitochondrial-like (LOC103958781), mRNA	-	-	-	http://www.genome.jp/dbget-bin/www_bget?ko:-	Q9FLD5	800	6.1e-84	AAA-ATPase ASD, mitochondrial OS=Arabidopsis thaliana OX=3702 GN=AATP1 PE=1 SV=1	PF00004//PF05496//PF00910//PF07728	ATPase family associated with various cellular activities (AAA)//Holliday junction DNA helicase RuvB P-loop domain//RNA helicase//AAA domain (dynein-related subfamily)	GO:0006281//GO:0006310	DNA repair//DNA recombination	GO:0016887//GO:0003724//GO:0003723//GO:0005524//GO:0009378	ATPase activity//RNA helicase activity//RNA binding//ATP binding//four-way junction helicase activity	GO:0009379//GO:0005657	Holliday junction helicase complex//replication fork	--	--	UP	4.8991	3.41e-09	estscan,start:1 end:1299
Cluster-41647.32149	53	580	572	0	0	0	0.37	4.16	4.1	0	0	0	5046	769797496	XP_011627814.1	1781	1.1e-195	structural maintenance of chromosomes protein 1 [Amborella trichopoda]	XM_030693439.1	XM_030693439	758	0	PREDICTED: Rhodamnia argentea structural maintenance of chromosomes protein 1A-like (LOC115754436), mRNA	K06636	SMC1	structural maintenance of chromosome 1	http://www.genome.jp/dbget-bin/www_bget?ko:K06636	O97593	2767	2.0e-311	Structural maintenance of chromosomes protein 1A OS=Bos taurus OX=9913 GN=SMC1A PE=1 SV=1	PF06470//PF00005//PF15234//PF04627//PF13304	SMC proteins Flexible Hinge Domain//ABC transporter//Linker for activation of T-cells//Mitochondrial ATP synthase epsilon chain//AAA domain, putative AbiEii toxin, Type IV TA system	GO:0051276//GO:0007165//GO:0015986	chromosome organization//signal transduction//ATP synthesis coupled proton transport	GO:0005524//GO:0005515//GO:0016887//GO:0046933	ATP binding//protein binding//ATPase activity//proton-transporting ATP synthase activity, rotational mechanism	GO:0000275//GO:0005694//GO:0016020//GO:0045259	mitochondrial proton-transporting ATP synthase complex, catalytic sector F(1)//chromosome//membrane//proton-transporting ATP synthase complex	KOG0018	Structural maintenance of chromosome protein 1 (sister chromatid cohesion complex Cohesin, subunit SMC1)	UP	11.015	3.44e-09	blast,frame:1 start:193 end:3969
Cluster-41647.34091	63	636	769	2	1	0	0.46	4.75	5.75	0.01	0.01	0	4848	1344013248	XP_023889254.1	1757	6.5e-193	chromatin structure-remodeling complex subunit snf21-like [Quercus suber]	XM_019058292.1	XM_019058292	125	1.86e-55	PREDICTED: Bemisia tabaci ATP-dependent helicase brm-like (LOC109041838), transcript variant X5, mRNA	-	-	-	http://www.genome.jp/dbget-bin/www_bget?ko:-	Q6DIC0	3012	0	Probable global transcription activator SNF2L2 OS=Mus musculus OX=10090 GN=Smarca2 PE=1 SV=1	PF07533//PF00176//PF14619	BRK domain//SNF2 family N-terminal domain//Snf2-ATP coupling, chromatin remodelling complex	--	--	GO:0042393//GO:0016817//GO:0005524//GO:0005515	histone binding//hydrolase activity, acting on acid anhydrides//ATP binding//protein binding	--	--	KOG0386	Chromatin remodeling complex SWI/SNF, component SWI2 and related ATPases (DNA/RNA helicase superfamily)	UP	8.9226	3.52e-09	blast,frame:3 start:195 end:4757
Cluster-41647.4280	61	365	700	0	0	0	0.4	2.43	4.65	0	0	0	5423	672142656	XP_008795187.1	719	1.7e-72	WD and tetratricopeptide repeats protein 1-like [Phoenix dactylifera]	--	--	--	--	--	K11807	WDTC1	WD and tetratricopeptide repeats protein 1	http://www.genome.jp/dbget-bin/www_bget?ko:K11807	Q8N5D0	586	1.7e-58	WD and tetratricopeptide repeats protein 1 OS=Homo sapiens OX=9606 GN=WDTC1 PE=1 SV=2	PF00400	WD domain, G-beta repeat	--	--	GO:0005515	protein binding	--	--	KOG1310	WD40 repeat protein	UP	10.926	3.52e-09	blast,frame:-2 start:2335 end:170
Cluster-40515.1	57	357	344	0	0	0	0.39	2.46	2.37	0	0	0	5238	1340524932	XP_023742856.1	274	6.4e-21	abnormal spindle-like microcephaly-associated protein homolog [Lactuca sativa]	--	--	--	--	--	K10357	MYO5	myosin V	http://www.genome.jp/dbget-bin/www_bget?ko:K10357	Q8QGQ6	368	3.1e-33	Circadian locomoter output cycles protein kaput OS=Gallus gallus OX=9031 GN=CLOCK PE=1 SV=2	PF07557//PF15199//PF00612//PF08447	Shugoshin C terminus//D-amino acid oxidase activator//IQ calmodulin-binding motif//PAS fold	GO:0045132//GO:1900758	meiotic chromosome segregation//negative regulation of D-amino-acid oxidase activity	GO:0005515	protein binding	GO:0000775//GO:0005634	chromosome, centromeric region//nucleus	--	--	UP	10.345	3.54e-09	blast,frame:-2 start:5237 end:4617
Cluster-41647.33453	83	693.87	922.91	0	1	0	1.68	14.09	18.79	0	0.02	0	1935	--	--	--	--	--	--	--	--	--	--	--	--	--	--	--	--	--	--	PF05887	Procyclic acidic repetitive protein (PARP)	--	--	--	--	GO:0016020	membrane	--	--	UP	10.554	3.78e-09	estscan,start:1 end:1227
Cluster-41647.18204	86	787	1387	1	4	0	4.13	37.11	65.94	0.05	0.19	0	969	--	--	--	--	--	--	--	--	--	--	--	--	--	--	Q9U5P1	225	2.2e-17	Fatty acid-binding protein OS=Lepidoglyphus destructor OX=36936 PE=1 SV=1	--	--	--	--	--	--	--	--	KOG4015	Fatty acid-binding protein FABP	UP	8.7749	3.79e-09	blast,frame:-1 start:525 end:97
Cluster-17860.0	52	530	625	0	0	0	0.37	3.85	4.54	0	0	0	4985	298715259	CBJ27908.1	371	3.5e-32	conserved unknown protein [Ectocarpus siliculosus]	--	--	--	--	--	K14834	NOC3	nucleolar complex protein 3	http://www.genome.jp/dbget-bin/www_bget?ko:K14834	Q8VI84	636	2.5e-64	Nucleolar complex protein 3 homolog OS=Mus musculus OX=10090 GN=Noc3l PE=2 SV=2	PF09787	Golgin subfamily A member 5	GO:0007030	Golgi organization	--	--	--	--	KOG2153	Protein involved in the nuclear export of pre-ribosomes	UP	11.02	3.97e-09	blast,frame:2 start:2 end:1771
Cluster-39793.0	54	457	649	0	0	0	3.08	25.45	36.5	0	0	0	857	242051529	XP_002454910.1	545	4e-53	40S ribosomal protein S15a-1 [Sorghum bicolor]	XM_030693462.1	XM_030693462	148	5.22e-69	PREDICTED: Rhodamnia argentea 40S ribosomal protein S15Aa (LOC115754459), mRNA	K02957	RP-S15Ae, RPS15A	small subunit ribosomal protein S15Ae	http://www.genome.jp/dbget-bin/www_bget?ko:K02957	Q76I82	602	3.7e-61	40S ribosomal protein S15a OS=Bos taurus OX=9913 GN=RPS15A PE=2 SV=1	PF00410	Ribosomal protein S8	GO:0042254//GO:0006412	ribosome biogenesis//translation	GO:0003735	structural constituent of ribosome	GO:0005840	ribosome	KOG1754	40S ribosomal protein S15/S22	UP	10.965	4e-09	blast,frame:2 start:269 end:739
Cluster-41647.24893	72.98	602.01	873	4	2	0	0.23	1.91	2.76	0.01	0.01	0	11125	1249607460	GAX97874.1	1298	2.5e-139	Hypothetical protein PINS_005750 [Pythium insidiosum]	XM_017254891.1	XM_017254891	272	8.25e-137	PREDICTED: Drosophila elegans UDP-N-acetylglucosamine--peptide N-acetylglucosaminyltransferase 110 kDa subunit (LOC108134541), transcript variant X1, mRNA	K09667	OGT	protein O-GlcNAc transferase	http://www.genome.jp/dbget-bin/www_bget?ko:K09667	Q8CGY8	3122	0	UDP-N-acetylglucosamine--peptide N-acetylglucosaminyltransferase 110 kDa subunit OS=Mus musculus OX=10090 GN=Ogt PE=1 SV=2	PF13304//PF13181//PF00515//PF13176//PF13174//PF01061//PF04912//PF16326//PF03193//PF07721//PF01292//PF02259//PF00005//PF06446//PF02609//PF01275//PF15387//PF00957	AAA domain, putative AbiEii toxin, Type IV TA system//Tetratricopeptide repeat//Tetratricopeptide repeat//Tetratricopeptide repeat//Tetratricopeptide repeat//ABC-2 type transporter//Dynamitin//ABC transporter C-terminal domain//RsgA GTPase//Tetratricopeptide repeat//Prokaryotic cytochrome b561//FAT domain//ABC transporter//Hepcidin//Exonuclease VII small subunit//Myelin proteolipid protein (PLP o…	GO:0006118//GO:0007017//GO:0006308//GO:0006879//GO:0016192	obsolete electron transport//microtubule-based process//DNA catabolic process//cellular iron ion homeostasis//vesicle-mediated transport	GO:0042802//GO:0016887//GO:0008855//GO:0009055//GO:0005524//GO:0003924//GO:0005515//GO:0005525//GO:0003677	identical protein binding//ATPase activity//exodeoxyribonuclease VII activity//electron transfer activity//ATP binding//GTPase activity//protein binding//GTP binding//DNA binding	GO:0005576//GO:0005869//GO:0016021//GO:0000408//GO:0016020//GO:0009318	extracellular region//dynactin complex//integral component of membrane//EKC/KEOPS complex//membrane//exodeoxyribonuclease VII complex	KOG4626	O-linked N-acetylglucosamine transferase OGT	UP	8.0246	4.05e-09	blast,frame:3 start:3 end:2531
Cluster-41647.30041	268	2742.14	3721	6	13	0	3.12	32.28	43.82	0.07	0.15	0	3166	698822877	XP_009844467.1	1087	2.1e-115	hypothetical protein H257_17381 [Aphanomyces astaci]	XM_020918051.1	XM_020918051	62	1.27e-20	PREDICTED: Boleophthalmus pectinirostris lissencephaly-1 homolog B (LOC110154111), mRNA	-	-	-	http://www.genome.jp/dbget-bin/www_bget?ko:-	B7PS00	1571	5.9e-173	Lissencephaly-1 homolog OS=Ixodes scapularis OX=6945 GN=IscW_ISCW007420 PE=3 SV=2	PF09398//PF00400//PF08513//PF04508//PF04053	FOP N terminal dimerisation domain//WD domain, G-beta repeat//LisH//Viral A-type inclusion protein repeat//Coatomer WD associated region	GO:0034453//GO:0016032//GO:0016192//GO:0006886	microtubule anchoring//viral process//vesicle-mediated transport//intracellular protein transport	GO:0005198//GO:0005515	structural molecule activity//protein binding	GO:0030117//GO:0005815	membrane coat//microtubule organizing center	KOG0266	WD40 repeat-containing protein	UP	8.4511	4.05e-09	blast,frame:3 start:918 end:2192
Cluster-41647.9328	128	786	1055	4	7	0	3.9	23.83	32.13	0.12	0.21	0	1375	545713183	XP_005708895.1	1187	2.3e-127	glyceraldehyde 3-phosphate dehydrogenase (phosphorylating) [Galdieria sulphuraria]	XM_003226457.2	XM_003226457	173	1.08e-82	PREDICTED: Anolis carolinensis glyceraldehyde-3-phosphate dehydrogenase (gapdh), mRNA	K00134	GAPDH, gapA	glyceraldehyde 3-phosphate dehydrogenase	http://www.genome.jp/dbget-bin/www_bget?ko:K00134	P16858	1275	5.4e-139	Glyceraldehyde-3-phosphate dehydrogenase OS=Mus musculus OX=10090 GN=Gapdh PE=1 SV=2	PF02800//PF02826//PF00044	Glyceraldehyde 3-phosphate dehydrogenase, C-terminal domain//D-isomer specific 2-hydroxyacid dehydrogenase, NAD binding domain//Glyceraldehyde 3-phosphate dehydrogenase, NAD binding domain	GO:0055114	oxidation-reduction process	GO:0051287//GO:0016620	NAD binding//oxidoreductase activity, acting on the aldehyde or oxo group of donors, NAD or NADP as acceptor	--	--	KOG0657	Glyceraldehyde 3-phosphate dehydrogenase	UP	7.4648	4.14e-09	blast,frame:2 start:269 end:1300
Cluster-41647.8876	73	899	1337	0	1	0	0.31	3.93	5.84	0	0	0	8120	1344063190	XP_023915198.1	2394	1.5e-266	acetyl-CoA carboxylase-like [Quercus suber]	XM_011260912.3	XM_011260912	182	6.45e-87	PREDICTED: Camponotus floridanus acetyl-CoA carboxylase (LOC105253107), transcript variant X5, mRNA	K11262	ACACA	acetyl-CoA carboxylase / biotin carboxylase 1 [EC:6.4.1.2 6.3.4.14]	http://www.genome.jp/dbget-bin/www_bget?ko:K11262	Q13085	3688	0	Acetyl-CoA carboxylase 1 OS=Homo sapiens OX=9606 GN=ACACA PE=1 SV=2	PF02786//PF08326//PF02655//PF07478	Carbamoyl-phosphate synthase L chain, ATP binding domain//Acetyl-CoA carboxylase, central region//ATP-grasp domain//D-ala D-ala ligase C-terminus	GO:0006090//GO:0006633//GO:0046436//GO:0009252	pyruvate metabolic process//fatty acid biosynthetic process//D-alanine metabolic process//peptidoglycan biosynthetic process	GO:0046872//GO:0003989//GO:0005524//GO:0008716	metal ion binding//acetyl-CoA carboxylase activity//ATP binding//D-alanine-D-alanine ligase activity	GO:0009317	acetyl-CoA carboxylase complex	KOG0368	Acetyl-CoA carboxylase	UP	10.997	4.14e-09	blast,frame:-1 start:7967 end:960
Cluster-41647.7129	162	175	135	510	410	404	1.09	1.2	0.92	3.4	2.84	2.78	5272	1173109164	XP_020530463.1	780	1.4e-79	uncharacterized protein LOC18446213 isoform X1 [Amborella trichopoda]	--	--	--	--	--	-	-	-	http://www.genome.jp/dbget-bin/www_bget?ko:-	--	--	--	--	PF00400//PF05965	WD domain, G-beta repeat//F/Y rich C-terminus	--	--	GO:0005515	protein binding	GO:0005634	nucleus	--	--	DOWN	-1.5626	4.14e-09	blast,frame:1 start:43 end:4830
Cluster-41647.7601	82	737	769	1	4	0	1.33	12	12.54	0.02	0.07	0	2355	--	--	--	--	--	--	--	--	--	--	--	--	--	--	--	--	--	--	--	--	--	--	--	--	--	--	--	--	UP	8.2571	4.15e-09	estscan,start:2088 end:199; minus strand
Cluster-41647.6728	151	1316.1	2004.98	5	8	0	1.02	8.99	13.69	0.03	0.06	0	5281	--	--	--	--	--	--	--	--	--	--	--	--	--	--	--	--	--	--	PF06699	GPI biosynthesis protein family Pig-F	GO:0006506	GPI anchor biosynthetic process	--	--	GO:0005789	endoplasmic reticulum membrane	--	--	UP	8.0524	4.16e-09	estscan,start:2291 end:4990
Cluster-41647.9034	60	566	822	2	2	0	4.97	44.91	66.22	0.16	0.16	0	672	1365984567	XP_024191133.1	480	1.1e-45	ubiquitin-40S ribosomal protein S27a isoform X2 [Rosa chinensis]	XM_021345489.1	XM_021345489	96	3.26e-40	PREDICTED: Helicoverpa armigera polyubiquitin-C (LOC110384272), transcript variant X5, mRNA	K08770	UBC	ubiquitin C	http://www.genome.jp/dbget-bin/www_bget?ko:K08770	Q1EC66	359	4.3e-33	Polyubiquitin 3 OS=Arabidopsis thaliana OX=3702 GN=UBQ3 PE=2 SV=1	PF01599//PF14560//PF08619//PF00240	Ribosomal protein S27a//Ubiquitin-like domain//Alkali metal cation/H+ antiporter Nha1 C terminus//Ubiquitin family	GO:0006885//GO:0006814//GO:0006412//GO:0042254	regulation of pH//sodium ion transport//translation//ribosome biogenesis	GO:0015385//GO:0003735//GO:0005515	sodium:proton antiporter activity//structural constituent of ribosome//protein binding	GO:0005840//GO:0016020	ribosome//membrane	KOG0004	Ubiquitin/40S ribosomal protein S27a fusion	UP	8.482	4.18e-09	blast,frame:3 start:153 end:617
Cluster-41647.3433	101	748	967	0	2	0	0.56	4.25	5.48	0	0.01	0	6310	1025030287	XP_016478228.1	1336	5.5e-144	PREDICTED: N-alpha-acetyltransferase 16, NatA auxiliary subunit-like [Nicotiana tabacum]	XM_029813701.1	XM_029813701	79	9.06e-30	PREDICTED: Formica exsecta N-alpha-acetyltransferase 15, NatA auxiliary subunit (LOC115239263), mRNA	-	-	-	http://www.genome.jp/dbget-bin/www_bget?ko:-	Q5R4J9	1879	2.3e-208	N-alpha-acetyltransferase 15, NatA auxiliary subunit OS=Pongo abelii OX=9601 GN=NAA15 PE=2 SV=1	PF05297//PF00515//PF15243//PF13181//PF13176	Herpesvirus latent membrane protein 1 (LMP1)//Tetratricopeptide repeat//Anaphase-promoting complex subunit 15//Tetratricopeptide repeat//Tetratricopeptide repeat	GO:0019087//GO:0090266	transformation of host cell by virus//regulation of mitotic cell cycle spindle assembly checkpoint	GO:0005515	protein binding	GO:0016021//GO:0005680	integral component of membrane//anaphase-promoting complex	KOG1156	N-terminal acetyltransferase	UP	9.7544	4.19e-09	blast,frame:2 start:98 end:2473
Cluster-41647.7516	53	456	608	0	0	0	1.2	10.36	13.85	0	0	0	1755	902550499	AKR76260.1	2115	7.2e-235	beta-1 tubulin [Dendrobium catenatum]	LM523204.1	LM523204	440	0	Parastrongyloides trichosuri genome assembly P_trichosuri_KNP ,scaffold PTRK_scaffold0000043	K07375	TUBB	tubulin beta	http://www.genome.jp/dbget-bin/www_bget?ko:K07375	O17449	2136	1e-238	Tubulin beta-1 chain OS=Manduca sexta OX=7130 PE=2 SV=1	PF00091	Tubulin/FtsZ family, GTPase domain	--	--	GO:0003924	GTPase activity	--	--	KOG1375	Beta tubulin	UP	10.91	4.19e-09	blast,frame:1 start:184 end:1536
Cluster-41647.35280	52	498	674	0	0	0	5.63	50.81	70.16	0	0	0	575	5123727	CAB45375.1	358	1.3e-31	ribosomal protein L31 [Cyanophora paradoxa]	--	--	--	--	--	K02910	RP-L31e, RPL31	large subunit ribosomal protein L31e	http://www.genome.jp/dbget-bin/www_bget?ko:K02910	Q7KF90	409	5.9e-39	60S ribosomal protein L31 OS=Spodoptera frugiperda OX=7108 GN=RpL31 PE=2 SV=1	PF01198	Ribosomal protein L31e	GO:0042254//GO:0006412	ribosome biogenesis//translation	GO:0003735	structural constituent of ribosome	GO:0005840	ribosome	KOG0893	60S ribosomal protein L31	UP	11.042	4.19e-09	blast,frame:-2 start:454 end:50
Cluster-41647.7478	79	742	815	0	1	0	1.24	11.71	12.88	0	0.02	0	2421	116788245	ABK24805.1	297	6.4e-24	unknown [Picea sitchensis]	--	--	--	--	--	K18646	ANP32A_C_D	acidic leucine-rich nuclear phosphoprotein 32 family member A/C/D	http://www.genome.jp/dbget-bin/www_bget?ko:K18646	Q9V895	496	2e-48	Acidic leucine-rich nuclear phosphoprotein 32 family member A OS=Drosophila melanogaster OX=7227 GN=Anp32a PE=2 SV=1	PF09769//PF13516//PF13855//PF00560	Apolipoprotein O//Leucine Rich repeat//Leucine rich repeat//Leucine Rich Repeat	GO:0042407	cristae formation	GO:0005515	protein binding	GO:0061617	MICOS complex	KOG2739	Leucine-rich acidic nuclear protein	UP	10.496	4.35e-09	blast,frame:1 start:406 end:1269
Cluster-41647.6234	81	665	904	0	1	0	0.76	6.29	8.54	0	0.01	0	3884	551660433	XP_005832984.1	398	2e-35	hypothetical protein GUITHDRAFT_56118, partial [Guillardia theta CCMP2712]	--	--	--	--	--	-	-	-	http://www.genome.jp/dbget-bin/www_bget?ko:-	Q8K1J6	637	1.5e-64	CCA tRNA nucleotidyltransferase 1, mitochondrial OS=Mus musculus OX=10090 GN=Trnt1 PE=1 SV=1	PF01743//PF00149	Poly A polymerase head domain//Calcineurin-like phosphoesterase	GO:0006396	RNA processing	GO:0016779//GO:0016787//GO:0003723	nucleotidyltransferase activity//hydrolase activity//RNA binding	--	--	KOG2159	tRNA nucleotidyltransferase/poly(A) polymerase	UP	10.511	4.35e-09	blast,frame:-3 start:3843 end:2923
Cluster-41647.8996	67	464	639	1	2	0	1.13	7.85	10.83	0.02	0.03	0	2275	326509331	BAJ91582.1	2575	4.3e-288	predicted protein [Hordeum vulgare subsp. vulgare]	KX982002.1	KX982002	300	4.53e-153	Diabrotica undecimpunctata howardi vacuolar ATPase subunit A mRNA, complete cds	K02145	ATPeV1A, ATP6A	V-type H+-transporting ATPase subunit A	http://www.genome.jp/dbget-bin/www_bget?ko:K02145	P31400	2579	5.6e-290	V-type proton ATPase catalytic subunit A OS=Manduca sexta OX=7130 GN=VHAA PE=2 SV=1	PF00006//PF02874	ATP synthase alpha/beta family, nucleotide-binding domain//ATP synthase alpha/beta family, beta-barrel domain	GO:1902600//GO:0046034	proton transmembrane transport//ATP metabolic process	GO:0005524	ATP binding	--	--	KOG1352	Vacuolar H+-ATPase V1 sector, subunit A	UP	8.5644	4.39e-09	blast,frame:2 start:197 end:2053
Cluster-41647.5983	55	410	703	0	0	0	1.17	8.77	15.08	0	0	0	1849	--	--	--	--	--	--	--	--	--	--	--	--	--	--	--	--	--	--	PF03343//PF00379	SART-1 family//Insect cuticle protein	GO:0000398	mRNA splicing, via spliceosome	GO:0042302	structural constituent of cuticle	--	--	--	--	UP	10.978	4.46e-09	estscan,start:1412 end:392; minus strand
Cluster-41647.3912	51	504	629	0	0	0	1.8	17.67	22.18	0	0	0	1221	1173942723	OQR91678.1	216	8e-15	hypothetical protein ACHHYP_04468 [Achlya hypogyna]	--	--	--	--	--	K11253	H3	histone H3	http://www.genome.jp/dbget-bin/www_bget?ko:K11253	P08898	208	2.6e-15	Histone H3 OS=Caenorhabditis elegans OX=6239 GN=his-2 PE=1 SV=4	PF15630//PF00125	CENP-S protein//Core histone H2A/H2B/H3/H4	--	--	GO:0003677	DNA binding	GO:0000786//GO:0071821	nucleosome//FANCM-MHF complex	--	--	UP	10.993	4.46e-09	blast,frame:2 start:128 end:751
Cluster-41647.8301	50	763.19	526	0	0	0	0.98	14.97	10.34	0	0	0	1995	2130615	AAB58342.1	196	2.7e-12	sex-determining region Y protein, partial [Carica papaya]	--	--	--	--	--	K11296	HMGB3	high mobility group protein B3	http://www.genome.jp/dbget-bin/www_bget?ko:K11296	Q32PP9	259	5.1e-21	Transcription factor Sox-14 OS=Danio rerio OX=7955 GN=sox14 PE=2 SV=1	PF07127	Late nodulin protein	GO:0009878	nodule morphogenesis	GO:0046872	metal ion binding	--	--	KOG0527	HMG-box transcription factor	UP	11.162	4.46e-09	blast,frame:3 start:327 end:1655
Cluster-41647.15721	566	709	2306.79	66	49	41	18.1	22.54	73.7	2.05	1.58	1.31	1322	747095497	XP_011095626.1	329	6.8e-28	uncharacterized protein LOC105175024 [Sesamum indicum]	--	--	--	--	--	-	-	-	http://www.genome.jp/dbget-bin/www_bget?ko:-	--	--	--	--	--	--	--	--	--	--	--	--	--	--	UP	4.4798	4.63e-09	blast,frame:1 start:202 end:810
Cluster-41647.5046	101	672	550	0	2	0	5.64	36.65	30.29	0	0.11	0	870	--	--	--	--	--	--	--	--	--	--	--	--	--	--	Q9VXY7	128	3.5e-06	Lipid storage droplets surface-binding protein 2 OS=Drosophila melanogaster OX=7227 GN=Lsd-2 PE=1 SV=1	--	--	--	--	--	--	--	--	--	--	UP	9.2917	4.76e-09	blast,frame:-1 start:819 end:58
Cluster-30873.0	67	409	461	1	2	0	0.33	2.05	2.31	0	0.01	0	7115	1117412727	XP_019413423.1	313	2.6e-25	PREDICTED: transcription factor E2FB-like [Lupinus angustifolius]	--	--	--	--	--	K06620	E2F3	transcription factor E2F3	http://www.genome.jp/dbget-bin/www_bget?ko:K06620	Q920I9	1250	2.2e-135	WD repeat-containing protein 7 OS=Mus musculus OX=10090 GN=Wdr7 PE=1 SV=3	PF00400//PF02166//PF02319//PF16421	WD domain, G-beta repeat//Androgen receptor//E2F/DP family winged-helix DNA-binding domain//E2F transcription factor CC-MB domain	GO:0006355//GO:0007165//GO:0030521	regulation of transcription, DNA-templated//signal transduction//androgen receptor signaling pathway	GO:0005515//GO:0003700//GO:0004879//GO:0003677//GO:0046983//GO:0005496	protein binding//DNA-binding transcription factor activity//nuclear receptor activity//DNA binding//protein dimerization activity//steroid binding	GO:0005634//GO:0005667	nucleus//transcription regulator complex	KOG4155	FOG: WD40 repeat	UP	8.2395	4.77e-09	blast,frame:-1 start:6356 end:5376
Cluster-41647.6294	63	498	620	2	1	0	1.36	10.76	13.43	0.04	0.02	0	1833	452823620	EME30629.1	785	1.3e-80	20S proteasome subunit alpha 4 [Galdieria sulphuraria]	--	--	--	--	--	K02731	PSMA7	20S proteasome subunit alpha 4	http://www.genome.jp/dbget-bin/www_bget?ko:K02731	Q4R7D9	880	4.6e-93	Proteasome subunit alpha type-7-like OS=Macaca fascicularis OX=9541 GN=PSMA7L PE=2 SV=1	PF07499//PF10584//PF00227//PF00538//PF00240	RuvA, C-terminal domain//Proteasome subunit A N-terminal signature//Proteasome subunit//linker histone H1 and H5 family//Ubiquitin family	GO:0006310//GO:0006281//GO:0006334//GO:0006511//GO:0051603	DNA recombination//DNA repair//nucleosome assembly//ubiquitin-dependent protein catabolic process//proteolysis involved in cellular protein catabolic process	GO:0005524//GO:0005515//GO:0003677//GO:0004175//GO:0004298//GO:0009378	ATP binding//protein binding//DNA binding//endopeptidase activity//threonine-type endopeptidase activity//four-way junction helicase activity	GO:0005839//GO:0000786//GO:0019773//GO:0005657//GO:0042025//GO:0009379	proteasome core complex//nucleosome//proteasome core complex, alpha-subunit complex//replication fork//host cell nucleus//Holliday junction helicase complex	KOG0183	20S proteasome, regulatory subunit alpha type PSMA7/PRE6	UP	8.6063	4.86e-09	blast,frame:-3 start:1612 end:770
Cluster-41647.6117	53	388	528	0	0	0	4.81	33.56	46.44	0	0	0	636	1605317374	TFJ85981.1	192	2.5e-12	hypothetical protein NSK_002801 [Nannochloropsis salina CCMP1776]	--	--	--	--	--	K02983	RP-S30e, RPS30	small subunit ribosomal protein S30e	http://www.genome.jp/dbget-bin/www_bget?ko:K02983	P62866	143	4.6e-08	40S ribosomal protein S30 OS=Bos taurus OX=9913 GN=FAU PE=3 SV=1	PF04758//PF00240	Ribosomal protein S30//Ubiquitin family	GO:0006412//GO:0042254	translation//ribosome biogenesis	GO:0003735//GO:0005515	structural constituent of ribosome//protein binding	GO:0005840	ribosome	KOG0009	Ubiquitin-like/40S ribosomal S30 protein fusion	UP	10.705	4.9e-09	blast,frame:-2 start:548 end:75
Cluster-41647.4668	47	699	635	0	0	0	0.8	11.97	10.89	0	0	0	2251	694453344	XP_009351413.1	410	4.7e-37	PREDICTED: innexin inx1-like, partial [Pyrus x bretschneideri]	XM_023305482.2	XM_023305482	42	1.18e-09	PREDICTED: Drosophila hydei innexin inx2 (LOC111592985), mRNA	--	--	--	--	Q9V427	907	4.2e-96	Innexin inx2 OS=Drosophila melanogaster OX=7227 GN=Inx2 PE=1 SV=1	--	--	--	--	--	--	--	--	--	--	UP	11.21	4.94e-09	blast,frame:2 start:1016 end:2137
Cluster-41647.9063	77	523	744	1	1	0	6.91	44.79	64.78	0.08	0.09	0	640	1492336136	RLN86232.1	620	5.9e-62	hypothetical protein BBJ28_00012898 [Nothophytophthora sp. Chile5]	EF070517.1	EF070517	146	4.97e-68	Maconellicoccus hirsutus clone WHMH2435 putative 60S ribosomal protein L23 mRNA, complete cds	K02894	RP-L23e, RPL23	large subunit ribosomal protein L23e	http://www.genome.jp/dbget-bin/www_bget?ko:K02894	P48159	663	2.3e-68	60S ribosomal protein L23 OS=Drosophila melanogaster OX=7227 GN=RpL23 PE=1 SV=2	PF00238	Ribosomal protein L14p/L23e	GO:0006412//GO:0042254	translation//ribosome biogenesis	GO:0003735	structural constituent of ribosome	GO:0005840	ribosome	KOG0901	60S ribosomal protein L14/L17/L23	UP	9.3558	4.96e-09	blast,frame:-1 start:514 end:71
Cluster-41647.7844	52	405	475	0	0	0	0.55	4.33	5.09	0	0	0	3458	676384901	XP_009035729.1	281	6.5e-22	hypothetical protein AURANDRAFT_63280 [Aureococcus anophagefferens]	--	--	--	--	--	-	-	-	http://www.genome.jp/dbget-bin/www_bget?ko:-	O15297	632	5e-64	Protein phosphatase 1D OS=Homo sapiens OX=9606 GN=PPM1D PE=1 SV=1	PF00481//PF13806	Protein phosphatase 2C//Rieske-like [2Fe-2S] domain	GO:0006807//GO:0055114	nitrogen compound metabolic process//oxidation-reduction process	GO:0008942//GO:0003824	nitrite reductase [NAD(P)H] activity//catalytic activity	--	--	KOG0698	Serine/threonine protein phosphatase	UP	10.647	4.96e-09	blast,frame:1 start:901 end:3189
Cluster-41647.7610	51	451	477	0	0	0	0.39	3.52	3.73	0	0	0	4648	1350248147	XP_006405234.2	236	1.5e-16	uncharacterized protein LOC18022287 [Eutrema salsugineum]	--	--	--	--	--	-	-	-	http://www.genome.jp/dbget-bin/www_bget?ko:-	Q92576	596	1e-59	PHD finger protein 3 OS=Homo sapiens OX=9606 GN=PHF3 PE=1 SV=3	PF02178//PF07500	AT hook motif//Transcription factor S-II (TFIIS), central domain	GO:0006351	transcription, DNA-templated	GO:0003677	DNA binding	--	--	KOG1634	Predicted transcription factor DATF1, contains PHD and TFS2M domains	UP	10.716	4.97e-09	blast,frame:-3 start:3974 end:282
Cluster-26525.1	53	357	392	0	0	0	0.29	2.01	2.21	0	0	0	6353	635369137	CCI42762.1	966	4.5e-101	unnamed protein product [Albugo candida]	XM_025201111.1	XM_025201111	41	1.21e-08	PREDICTED: Alligator sinensis Scm polycomb group protein like 2 (SCML2), transcript variant X9, mRNA	-	-	-	http://www.genome.jp/dbget-bin/www_bget?ko:-	Q5FWR0	1568	2.7e-172	SWI/SNF-related matrix-associated actin-dependent regulator of chromatin subfamily A containing DEAD/H box 1 OS=Xenopus tropicalis OX=8364 GN=smarcad1 PE=2 SV=1	PF00536//PF00633//PF00270//PF00176//PF02820//PF04851//PF06733//PF04147	SAM domain (Sterile alpha motif)//Helix-hairpin-helix motif//DEAD/DEAH box helicase//SNF2 family N-terminal domain//mbt repeat//Type III restriction enzyme, res subunit//DEAD_2//Nop14-like family	GO:0006355	regulation of transcription, DNA-templated	GO:0003677//GO:0005515//GO:0016787//GO:0005524//GO:0003676//GO:0003678	DNA binding//protein binding//hydrolase activity//ATP binding//nucleic acid binding//DNA helicase activity	GO:0005634//GO:0005657//GO:0032040	nucleus//replication fork//small-subunit processome	KOG0389	SNF2 family DNA-dependent ATPase	UP	10.429	4.98e-09	blast,frame:-3 start:5715 end:3241
Cluster-41647.17876	236	191	392	15	4	1	13.96	11.01	22.83	0.84	0.23	0.06	836	719994898	XP_010254319.1	631	4.1e-63	PREDICTED: uncharacterized protein LOC104595325 [Nelumbo nucifera]	XM_023141155.1	XM_023141155	39	1.99e-08	PREDICTED: Cucurbita maxima uncharacterized LOC111492011 (LOC111492011), mRNA	-	-	-	http://www.genome.jp/dbget-bin/www_bget?ko:-	--	--	--	--	--	--	--	--	--	--	--	--	--	--	UP	5.3909	5.01e-09	estscan,start:571 end:836
Cluster-41647.19001	3623	3741	9612	371	374	114	58.89	61.19	157.46	5.92	6.19	1.88	2345	1072977930	XP_018439322.1	400	7.1e-36	PREDICTED: UPF0481 protein At3g47200-like [Raphanus sativus]	--	--	--	--	--	-	-	-	http://www.genome.jp/dbget-bin/www_bget?ko:-	Q9SD53	271	2.4e-22	UPF0481 protein At3g47200 OS=Arabidopsis thaliana OX=3702 GN=At3g47200 PE=2 SV=1	PF04971	Bacteriophage P21 holin S	GO:0019835	cytolysis	--	--	--	--	--	--	UP	4.2933	5.01e-09	blast,frame:-2 start:1687 end:197
Cluster-41647.13232	1910.91	1736.79	4057.81	240.4	106.76	51.29	36.85	33.63	78.74	4.54	2.09	1	2018	1216990608	XP_021692356.1	1070	1.2e-113	LRR receptor-like serine/threonine-protein kinase FLS2 [Hevea brasiliensis]	--	--	--	--	--	-	-	-	http://www.genome.jp/dbget-bin/www_bget?ko:-	Q6JN46	841	1.7e-88	Receptor-like protein EIX2 OS=Solanum lycopersicum OX=4081 GN=EIX2 PE=1 SV=2	PF00560//PF13855//PF13516	Leucine Rich Repeat//Leucine rich repeat//Leucine Rich repeat	--	--	GO:0005515	protein binding	--	--	--	--	UP	4.2987	5.03e-09	estscan,start:2018 end:1; minus strand
Cluster-41647.8704	48	553	675	0	0	0	0.29	3.41	4.16	0	0	0	5820	77176709	ABA64469.1	4330	0	DNA-dependent RNA polymerase II largest subunit [Glaucocystis nostochinearum]	XM_011501035.1	XM_011501035	714	0	PREDICTED: Ceratosolen solmsi marchali DNA-directed RNA polymerase II subunit RPB1 (LOC105363368), mRNA	K03006	RPB1, POLR2A	DNA-directed RNA polymerase II subunit RPB1	http://www.genome.jp/dbget-bin/www_bget?ko:K03006	P04052	6044	0	DNA-directed RNA polymerase II subunit RPB1 OS=Drosophila melanogaster OX=7227 GN=RpII215 PE=3 SV=4	PF03083//PF05001//PF04990//PF04998//PF05000//PF04997//PF04983//PF00623//PF04992//PF09290	Sugar efflux transporter for intercellular exchange//RNA polymerase Rpb1 C-terminal repeat//RNA polymerase Rpb1, domain 7//RNA polymerase Rpb1, domain 5//RNA polymerase Rpb1, domain 4//RNA polymerase Rpb1, domain 1//RNA polymerase Rpb1, domain 3//RNA polymerase Rpb1, domain 2//RNA polymerase Rpb1, domain 6//Prokaryotic acetaldehyde dehydrogenase, dimerisation	GO:0006206//GO:0006144//GO:0006351//GO:0019439//GO:0006090//GO:0006366//GO:0055114	pyrimidine nucleobase metabolic process//purine nucleobase metabolic process//transcription, DNA-templated//aromatic compound catabolic process//pyruvate metabolic process//transcription by RNA polymerase II//oxidation-reduction process	GO:0003677//GO:0008774//GO:0003899	DNA binding//acetaldehyde dehydrogenase (acetylating) activity//DNA-directed 5'-3' RNA polymerase activity	GO:0005730//GO:0005665//GO:0016021	nucleolus//RNA polymerase II, core complex//integral component of membrane	KOG0260	RNA polymerase II, large subunit	UP	11.1	5.21e-09	blast,frame:-2 start:5552 end:57
Cluster-35356.3	52	380	491	0	0	0	0.75	5.51	7.13	0	0	0	2614	1214692631	OWZ07184.1	212	5e-14	Homebox and aldo/keto reductase [Phytophthora megakarya]	XM_031716078.1	XM_031716078	50	4.92e-14	PREDICTED: Actinia tenebrosa homeobox protein Meis1-like (LOC116306045), transcript variant X8, mRNA	-	-	-	http://www.genome.jp/dbget-bin/www_bget?ko:-	O46339	433	4.5e-41	Homeobox protein homothorax OS=Drosophila melanogaster OX=7227 GN=hth PE=1 SV=1	PF15549//PF00046//PF05920	PGC7/Stella/Dppa3 domain//Homeodomain//Homeobox KN domain	GO:0006355	regulation of transcription, DNA-templated	GO:0003677//GO:0035064	DNA binding//methylated histone binding	--	--	KOG0773	Transcription factor MEIS1 and related HOX domain proteins	UP	10.634	5.28e-09	blast,frame:3 start:183 end:962
Cluster-41647.16706	1159.13	835.04	3520.06	65	86	26	44.87	31.98	135.66	2.43	3.34	1	1138	1201317920	OVA17023.1	204	1.8e-13	DNA-binding WRKY [Macleaya cordata]	--	--	--	--	--	-	-	-	http://www.genome.jp/dbget-bin/www_bget?ko:-	Q93WU9	175	1.6e-11	Probable WRKY transcription factor 51 OS=Arabidopsis thaliana OX=3702 GN=WRKY51 PE=1 SV=1	PF03106	WRKY DNA -binding domain	GO:0006355	regulation of transcription, DNA-templated	GO:0043565//GO:0003700	sequence-specific DNA binding//DNA-binding transcription factor activity	GO:0005667	transcription regulator complex	--	--	UP	4.9361	5.28e-09	blast,frame:-3 start:956 end:486|blast,frame:-2 start:474 end:214
Cluster-41647.5124	57	365	796	0	0	0	2.02	12.82	28.12	0	0	0	1219	326525425	BAJ88759.1	138	8.8e-06	predicted protein, partial [Hordeum vulgare subsp. vulgare]	--	--	--	--	--	--	--	--	--	P84251	224	3.6e-17	Cuticle protein 10.9 OS=Ixodes ricinus OX=34613 PE=1 SV=1	PF01925//PF02910//PF00379	Sulfite exporter TauE/SafE//Fumarate reductase flavoprotein C-term//Insect cuticle protein	GO:0055114	oxidation-reduction process	GO:0042302//GO:0016491	structural constituent of cuticle//oxidoreductase activity	GO:0016021	integral component of membrane	--	--	UP	11.041	5.28e-09	blast,frame:1 start:1 end:1134
Cluster-41647.3358	58	523	624	2	2	0	0.53	4.85	5.78	0.02	0.02	0	3957	1562649770	RXH90151.1	844	3.9e-87	hypothetical protein DVH24_032508 [Malus domestica]	--	--	--	--	--	K01897	ACSL, fadD	long-chain acyl-CoA synthetase	http://www.genome.jp/dbget-bin/www_bget?ko:K01897	Q5R668	818	1.5e-85	Long-chain-fatty-acid--CoA ligase 3 OS=Pongo abelii OX=9601 GN=ACSL3 PE=2 SV=2	PF00501	AMP-binding enzyme	--	--	GO:0003824	catalytic activity	--	--	KOG1180	Acyl-CoA synthetase	UP	8.2123	5.28e-09	blast,frame:-1 start:3957 end:829
Cluster-41647.20625	1059	1490	1831	247	112	72	13.26	18.83	23.16	3.04	1.43	0.91	2965	548862531	ERN19889.1	2151	8.1e-239	hypothetical protein AMTR_s00071p00064260 [Amborella trichopoda]	XM_010939800.3	XM_010939800	196	3.86e-95	PREDICTED: Elaeis guineensis endoglucanase 9 (LOC105057253), mRNA	-	-	-	http://www.genome.jp/dbget-bin/www_bget?ko:-	Q38890	2068	1.3e-230	Endoglucanase 25 OS=Arabidopsis thaliana OX=3702 GN=KOR PE=1 SV=1	PF16045//PF00759	LisH//Glycosyl hydrolase family 9	GO:0005975	carbohydrate metabolic process	GO:0004553//GO:0005515	hydrolase activity, hydrolyzing O-glycosyl compounds//protein binding	--	--	--	--	UP	3.3454	5.29e-09	blast,frame:2 start:638 end:2497
Cluster-41647.6634	52	381	544	0	0	0	5.03	34.96	50.82	0	0	0	613	--	--	--	--	--	--	--	--	--	--	--	--	--	--	--	--	--	--	PF02950	Conotoxin	GO:0006810//GO:0009405	transport//pathogenesis	GO:0008200	ion channel inhibitor activity	GO:0005576	extracellular region	--	--	UP	10.717	5.45e-09	estscan,start:1 end:99
Cluster-41647.32890	49	553	466.99	0	0	0	1.16	13.14	11.13	0	0	0	1688	--	--	--	--	--	--	--	--	--	--	--	--	--	--	--	--	--	--	--	--	--	--	--	--	--	--	--	--	UP	10.84	5.45e-09	estscan,start:1258 end:191; minus strand
Cluster-41647.3708	50	458	441	0	0	0	0.37	3.46	3.33	0	0	0	4803	693501740	CEF96744.1	826	5.8e-85	Paired amphipathic helix [Ostreococcus tauri]	XM_011060647.1	XM_011060647	78	2.48e-29	PREDICTED: Acromyrmex echinatior paired amphipathic helix protein Sin3b (LOC105148747), transcript variant X3, mRNA	K11644	SIN3A	paired amphipathic helix protein Sin3a	http://www.genome.jp/dbget-bin/www_bget?ko:K11644	Q96ST3	1986	6.8e-221	Paired amphipathic helix protein Sin3a OS=Homo sapiens OX=9606 GN=SIN3A PE=1 SV=2	PF04564//PF01413//PF00397//PF02671	U-box domain//C-terminal tandem repeated domain in type 4 procollagen//WW domain//Paired amphipathic helix repeat	GO:0006355//GO:0016567	regulation of transcription, DNA-templated//protein ubiquitination	GO:0005515//GO:0004842//GO:0005201	protein binding//ubiquitin-protein transferase activity//extracellular matrix structural constituent	GO:0005581	collagen trimer	KOG4204	Histone deacetylase complex, SIN3 component	UP	10.67	5.47e-09	blast,frame:-3 start:4594 end:821
Cluster-41647.5932	68	467	653	3	3	0	3.3	22.26	31.39	0.14	0.15	0	961	545708593	XP_005706608.1	979	2.1e-103	40S ribosomal protein S4e [Galdieria sulphuraria]	BT110373.1	BT110373	408	0	Picea glauca clone GQ03220_M14 mRNA sequence	K02987	RP-S4e, RPS4	small subunit ribosomal protein S4e	http://www.genome.jp/dbget-bin/www_bget?ko:K02987	Q4PMB3	1139	2.2e-123	40S ribosomal protein S4 OS=Ixodes scapularis OX=6945 GN=RpS4 PE=2 SV=1	PF01479	S4 domain	--	--	GO:0003723	RNA binding	--	--	KOG0378	40S ribosomal protein S4	UP	7.6176	5.71e-09	blast,frame:1 start:103 end:885
Cluster-41647.21230	34918.7	46697.9	41369.2	4783.03	1283.74	3518.76	1340.97	1774.57	1581.87	177.43	49.42	134.96	1145	224285635	ACN40536.1	566	1.9e-55	unknown [Picea sitchensis]	AK412412.1	AK412412	128	9.24e-58	Cryptomeria japonica mRNA, clone: CMFL004_M11, expressed in male strobili	K18980	EO, FaQR	2-methylene-furan-3-one reductase	http://www.genome.jp/dbget-bin/www_bget?ko:K18980	K4BW79	409	1.2e-38	2-methylene-furan-3-one reductase OS=Solanum lycopersicum OX=4081 GN=EO PE=1 SV=1	PF00208//PF08240//PF05324//PF00107//PF02590//PF01118	Glutamate/Leucine/Phenylalanine/Valine dehydrogenase//Alcohol dehydrogenase GroES-like domain//Sperm antigen HE2//Zinc-binding dehydrogenase//Predicted SPOUT methyltransferase//Semialdehyde dehydrogenase, NAD binding domain	GO:0006520//GO:0055114//GO:0006364	cellular amino acid metabolic process//oxidation-reduction process//rRNA processing	GO:0016620//GO:0051287//GO:0016491//GO:0008168	oxidoreductase activity, acting on the aldehyde or oxo group of donors, NAD or NADP as acceptor//NAD binding//oxidoreductase activity//methyltransferase activity	GO:0005576	extracellular region	--	--	UP	3.6167	5.71e-09	blast,frame:-1 start:698 end:3
Cluster-41647.14059	56	487.16	265.59	0	0	0	1.22	10.63	5.81	0	0	0	1817	--	--	--	--	--	--	--	--	--	--	--	--	--	--	--	--	--	--	--	--	--	--	--	--	--	--	--	--	UP	10.432	5.76e-09	estscan,start:1341 end:583; minus strand
Cluster-41647.10100	334	309	670	60	35	27	7.12	6.61	14.36	1.25	0.76	0.58	1850	1376859475	PTQ50016.1	703	4.1e-71	hypothetical protein MARPO_0001s0077 [Marchantia polymorpha]	--	--	--	--	--	-	-	-	http://www.genome.jp/dbget-bin/www_bget?ko:-	Q9FFN2	391	2.3e-36	Probable glycosyltransferase At5g03795 OS=Arabidopsis thaliana OX=3702 GN=At5g03795 PE=3 SV=2	--	--	--	--	--	--	--	--	--	--	UP	3.4013	5.77e-09	blast,frame:2 start:233 end:1609
Cluster-41647.32362	21	3580.99	2742.02	0	0	0	0.14	24.45	18.71	0	0	0	5285	--	--	--	--	--	--	--	--	--	--	--	--	--	--	--	--	--	--	--	--	--	--	--	--	--	--	--	--	UP	13.407	5.79e-09	estscan,start:485 end:5039
Cluster-41647.5693	50	411	453.12	0	0	0	0.55	4.58	5.06	0	0	0	3328	--	--	--	--	--	--	--	--	--	--	--	--	--	--	P34082	751	7.6e-78	Fasciclin-2 OS=Drosophila melanogaster OX=7227 GN=Fas2 PE=1 SV=1	PF00041//PF16656	Fibronectin type III domain//Purple acid Phosphatase, N-terminal domain	GO:0006771//GO:0019497	riboflavin metabolic process//hexachlorocyclohexane metabolic process	GO:0046872//GO:0005515//GO:0003993	metal ion binding//protein binding//acid phosphatase activity	--	--	--	--	UP	10.617	5.79e-09	blast,frame:-2 start:2958 end:502
Cluster-41647.9168	47	1316	5395.08	1	0	0	1.53	42.67	175.8	0.03	0	0	1301	--	--	--	--	--	--	--	--	--	--	--	--	--	--	--	--	--	--	PF14813	NADH dehydrogenase 1 beta subcomplex subunit 2	--	--	--	--	GO:0005743//GO:0005747	mitochondrial inner membrane//mitochondrial respiratory chain complex I	--	--	UP	12.559	5.93e-09	estscan,start:374 end:123; minus strand
Cluster-41647.10267	66	200	488	0	0	0	0.48	1.47	3.59	0	0	0	4918	--	--	--	--	--	--	--	--	--	--	--	--	--	--	Q03755	167	5.9e-10	Cuticlin-1 OS=Caenorhabditis elegans OX=6239 GN=cut-1 PE=2 SV=2	PF06214	Signaling lymphocytic activation molecule (SLAM) protein	GO:0046649	lymphocyte activation	GO:0038023	signaling receptor activity	GO:0009986//GO:0016021	cell surface//integral component of membrane	--	--	UP	10.35	5.98e-09	blast,frame:3 start:777 end:4901
Cluster-41647.3940	50	394	452.09	0	0	0	0.72	5.7	6.54	0	0	0	2622	294863157	B9A1H3.1	1350	5.5e-146	RecName: Full=Thioredoxin reductase SEP1; Short=EhSEP1	XM_020521125.1	XM_020521125	60	1.36e-19	PREDICTED: Rhincodon typus thioredoxin reductase 2, mitochondrial-like (LOC109921075), partial mRNA	K00384	trxB	thioredoxin reductase (NADPH)	http://www.genome.jp/dbget-bin/www_bget?ko:K00384	O89049	1492	7.1e-164	Thioredoxin reductase 1, cytoplasmic OS=Rattus norvegicus OX=10116 GN=Txnrd1 PE=1 SV=5	PF01266//PF07992//PF02852	FAD dependent oxidoreductase//Pyridine nucleotide-disulphide oxidoreductase//Pyridine nucleotide-disulphide oxidoreductase, dimerisation domain	GO:0055114//GO:0045454	oxidation-reduction process//cell redox homeostasis	GO:0016491	oxidoreductase activity	--	--	KOG4716	Thioredoxin reductase	UP	10.589	6.01e-09	blast,frame:-3 start:2521 end:986
Cluster-41647.8746	51	406	692	0	0	0	0.72	5.75	9.82	0	0	0	2670	600171	AAA80494.1	2687	5.2e-301	aconitase [Gracilariopsis longissima]	XM_022381802.1	XM_022381802	276	1.17e-139	PREDICTED: Limulus polyphemus aconitate hydratase, mitochondrial-like (LOC106478249), transcript variant X3, mRNA	K01681	ACO, acnA	aconitate hydratase	http://www.genome.jp/dbget-bin/www_bget?ko:K01681	P20004	2862	0	Aconitate hydratase, mitochondrial OS=Bos taurus OX=9913 GN=ACO2 PE=1 SV=4	--	--	--	--	--	--	--	--	KOG0453	Aconitase/homoaconitase (aconitase superfamily)	UP	10.954	6.09e-09	blast,frame:3 start:141 end:2507
Cluster-41647.8453	140	1289.08	1761	7	7	0	2.51	23.21	31.77	0.12	0.13	0	2152	--	--	--	--	--	--	--	--	--	--	--	--	--	--	--	--	--	--	--	--	--	--	--	--	--	--	--	--	UP	7.8425	6.18e-09	estscan,start:470 end:1810
Cluster-41647.7563	74	656	912	1	0	0	2.49	21.93	30.65	0.03	0	0	1269	--	--	--	--	--	--	--	--	--	--	--	--	--	--	--	--	--	--	--	--	--	--	--	--	--	--	--	--	UP	10.504	6.18e-09	estscan,start:178 end:1134
Cluster-41647.7000	48	462	599	0	0	0	0.88	8.53	11.08	0	0	0	2104	29409366	AAM29179.1	980	3.5e-103	prohibitin protein Wph [Triticum aestivum]	XM_011496043.1	XM_011496043	152	7.85e-71	PREDICTED: Ceratosolen solmsi marchali protein l(2)37Cc (LOC105359424), transcript variant X2, mRNA	K17080	PHB1	prohibitin 1	http://www.genome.jp/dbget-bin/www_bget?ko:K17080	P24156	942	3.4e-100	Protein l(2)37Cc OS=Drosophila melanogaster OX=7227 GN=l(2)37Cc PE=2 SV=2	--	--	--	--	--	--	--	--	KOG3083	Prohibitin	UP	10.899	6.2e-09	blast,frame:-1 start:1978 end:1139
Cluster-17073.0	56	67	66	6	5	3	1.58	1.89	1.86	0.16	0.14	0.09	1463	--	--	--	--	--	--	--	--	--	--	--	--	--	--	--	--	--	--	--	--	--	--	--	--	--	--	--	--	UP	3.6951	6.25e-09	estscan,start:1018 end:465; minus strand
Cluster-41647.21243	743.81	1251.39	1254.37	244	143	106	30.8	51.17	51.64	9.74	5.93	4.38	1081	148909941	ABR18056.1	796	3.9e-82	unknown [Picea sitchensis]	--	--	--	--	--	-	-	-	http://www.genome.jp/dbget-bin/www_bget?ko:-	Q5MR23	454	6.8e-44	Receptor-like protein 9DC3 OS=Solanum pimpinellifolium OX=4084 GN=9DC3 PE=3 SV=1	PF15019//PF13516//PF13855//PF00560	C9orf72-like protein family//Leucine Rich repeat//Leucine rich repeat//Leucine Rich Repeat	GO:0043087	regulation of GTPase activity	GO:0005515//GO:0005085	protein binding//guanyl-nucleotide exchange factor activity	--	--	--	--	UP	2.6905	6.3e-09	blast,frame:1 start:1 end:1080
Cluster-41647.6864	66	706	756	1	1	0	0.82	8.83	9.46	0.01	0.01	0	2995	674921110	CDY12064.1	434	1e-39	BnaC03g59800D [Brassica napus]	XM_030689429.1	XM_030689429	134	1.14e-60	PREDICTED: Rhodamnia argentea 60S ribosomal protein L44-like (LOC115751506), mRNA	-	-	-	http://www.genome.jp/dbget-bin/www_bget?ko:-	P90702	486	3.6e-47	60S ribosomal protein L44 OS=Brugia malayi OX=6279 GN=rpl-44 PE=3 SV=3	PF00935//PF00471	Ribosomal protein L44//Ribosomal protein L33	GO:0042254//GO:0006412	ribosome biogenesis//translation	GO:0003735	structural constituent of ribosome	GO:0005840	ribosome	KOG3464	60S ribosomal protein L44	UP	9.5391	6.3e-09	blast,frame:-3 start:2819 end:2448
Cluster-41647.31605	53	299	458	0	0	0	1.96	10.95	16.87	0	0	0	1179	--	--	--	--	--	--	--	--	--	--	--	--	--	--	--	--	--	--	--	--	--	--	--	--	--	--	--	--	UP	10.448	6.4e-09	--
Cluster-41647.31364	78	547	675	0	1	0	5.26	35.7	44.59	0	0.07	0	766	397636985	EJK72485.1	277	4.2e-22	hypothetical protein THAOC_05982 [Thalassiosira oceanica]	--	--	--	--	--	K02875	RP-L14e, RPL14	large subunit ribosomal protein L14e	http://www.genome.jp/dbget-bin/www_bget?ko:K02875	P50914	334	3.9e-30	60S ribosomal protein L14 OS=Homo sapiens OX=9606 GN=RPL14 PE=1 SV=4	PF01929	Ribosomal protein L14	GO:0042254//GO:0006412	ribosome biogenesis//translation	GO:0003735	structural constituent of ribosome	GO:0005840	ribosome	KOG3421	60S ribosomal protein L14	UP	10.166	6.42e-09	blast,frame:-3 start:524 end:21
Cluster-41647.3880	43	719	682	0	0	0	0.91	15.29	14.54	0	0	0	1859	--	--	--	--	--	--	--	--	--	--	--	--	--	--	Q8IW19	168	1.7e-10	Aprataxin and PNK-like factor OS=Homo sapiens OX=9606 GN=APLF PE=1 SV=1	PF00498	FHA domain	--	--	GO:0005515	protein binding	--	--	--	--	UP	11.275	6.43e-09	blast,frame:2 start:404 end:1543
Cluster-41647.24965	2434	2211	5231.28	406	334	181	28.2	25.87	61.25	4.63	3.95	2.13	3183	769821156	XP_006833105.2	1688	4.3e-185	G-type lectin S-receptor-like serine/threonine-protein kinase At2g19130 [Amborella trichopoda]	--	--	--	--	--	-	-	-	http://www.genome.jp/dbget-bin/www_bget?ko:-	O64477	1565	3e-172	G-type lectin S-receptor-like serine/threonine-protein kinase At2g19130 OS=Arabidopsis thaliana OX=3702 GN=At2g19130 PE=2 SV=1	PF00276//PF07714//PF00954//PF00069//PF05445	Ribosomal protein L23//Protein tyrosine and serine/threonine kinase//S-locus glycoprotein domain//Protein kinase domain//Poxvirus serine/threonine protein kinase	GO:0042254//GO:0006468//GO:0048544//GO:0006412	ribosome biogenesis//protein phosphorylation//recognition of pollen//translation	GO:0005524//GO:0003735//GO:0004672	ATP binding//structural constituent of ribosome//protein kinase activity	GO:0005840	ribosome	--	--	UP	3.3964	6.45e-09	blast,frame:3 start:117 end:2222
Cluster-41647.34451	146	197	528	14	10	12	4.54	6.09	16.4	0.42	0.31	0.37	1353	--	--	--	--	--	--	--	--	--	--	--	--	--	--	--	--	--	--	--	--	--	--	--	--	--	--	--	--	UP	4.5329	6.45e-09	estscan,start:1353 end:921; minus strand
Cluster-41647.8047	69	494	719	4	2	0	0.35	2.56	3.73	0.02	0.01	0	6880	1322414383	PLY93801.1	1493	3.8e-162	hypothetical protein LSAT_6X89400 [Lactuca sativa]	XM_015928761.2	XM_015928761	80	2.75e-30	PREDICTED: Tetranychus urticae protein kinase C and casein kinase substrate in neurons protein 1-like (LOC107361834), mRNA	K01338	lon	ATP-dependent Lon protease	http://www.genome.jp/dbget-bin/www_bget?ko:K01338	Q3SX23	1777	1.7e-196	Lon protease homolog 2, peroxisomal OS=Bos taurus OX=9913 GN=LONP2 PE=2 SV=1	PF05362//PF02050//PF06068//PF00004//PF06414//PF09787//PF00931//PF07726//PF09596//PF00005//PF09769//PF14604//PF07728//PF17078//PF05496//PF14532//PF07724//PF00018//PF07653//PF00910	Lon protease (S16) C-terminal proteolytic domain//Flagellar FliJ protein//TIP49 P-loop domain//ATPase family associated with various cellular activities (AAA)//Zeta toxin//Golgin subfamily A member 5//NB-ARC domain//ATPase family associated with various cellular activities (AAA)//MamL-1 domain//ABC transporter//Apolipoprotein O//Variant SH3 domain//AAA domain (dynein-related subfamily)//SWI5-depe…	GO:0042407//GO:0006310//GO:0051028//GO:0045944//GO:0006281//GO:0006355//GO:0071973//GO:0048309//GO:0007219//GO:0006510//GO:0007030//GO:0006508	cristae formation//DNA recombination//mRNA transport//positive regulation of transcription by RNA polymerase II//DNA repair//regulation of transcription, DNA-templated//bacterial-type flagellum-dependent cell motility//endoplasmic reticulum inheritance//Notch signaling pathway//obsolete ATP-dependent proteolysis//Golgi organization//proteolysis	GO:0043531//GO:0004176//GO:0008134//GO:0005524//GO:0005515//GO:0003724//GO:0016301//GO:0009378//GO:0003678//GO:0004252//GO:0003713//GO:0003723//GO:0016887	ADP binding//ATP-dependent peptidase activity//transcription factor binding//ATP binding//protein binding//RNA helicase activity//kinase activity//four-way junction helicase activity//DNA helicase activity//serine-type endopeptidase activity//transcription coactivator activity//RNA binding//ATPase activity	GO:0005657//GO:0016607//GO:0005667//GO:0061617//GO:0009288//GO:0009379	replication fork//nuclear speck//transcription regulator complex//MICOS complex//bacterial-type flagellum//Holliday junction helicase complex	KOG2004	Mitochondrial ATP-dependent protease PIM1/LON	UP	7.7509	6.61e-09	blast,frame:3 start:600 end:3512
Cluster-41647.8206	88	878	1286	3	0	0	0.83	8.42	12.34	0.03	0	0	3831	1523526039	RQM20484.1	1818	4.3e-200	hypothetical protein B5M09_011530 [Aphanomyces astaci]	XM_023849698.1	XM_023849698	159	1.85e-74	PREDICTED: Cryptotermes secundus plasma membrane calcium-transporting ATPase 3 (LOC111863401), transcript variant X19, mRNA	K01537	E3.6.3.8	Ca2+-transporting ATPase	http://www.genome.jp/dbget-bin/www_bget?ko:K01537	Q16720	2631	8.8e-296	Plasma membrane calcium-transporting ATPase 3 OS=Homo sapiens OX=9606 GN=ATP2B3 PE=1 SV=3	PF10278//PF12424	Mediator of RNA pol II transcription subunit 19//Plasma membrane calcium transporter ATPase C terminal	GO:0006816//GO:0006357	calcium ion transport//regulation of transcription by RNA polymerase II	GO:0005388//GO:0003712	calcium transmembrane transporter activity, phosphorylative mechanism//transcription coregulator activity	GO:0005667//GO:0016529//GO:0016592	transcription regulator complex//sarcoplasmic reticulum//mediator complex	KOG0204	Calcium transporting ATPase	UP	9.5874	6.7e-09	blast,frame:1 start:1 end:2577
Cluster-41647.25579	138.43	156	131.02	20	14	4	20.95	21.64	18.69	2.72	1.98	0.57	485	116794080	ABK26999.1	236	1.5e-17	unknown [Picea sitchensis]	AP019301.1	AP019301	53	1.85e-16	Prunus dulcis DNA, pseudomolecule Pd05	-	-	-	http://www.genome.jp/dbget-bin/www_bget?ko:-	P93007	185	4.7e-13	Ethylene-responsive transcription factor ERF112 OS=Arabidopsis thaliana OX=3702 GN=ERF112 PE=1 SV=1	PF00847	AP2 domain	GO:0006355	regulation of transcription, DNA-templated	GO:0003700	DNA-binding transcription factor activity	GO:0005667	transcription regulator complex	--	--	UP	3.4602	6.7e-09	blast,frame:1 start:1 end:483
Cluster-46035.0	52	292	413	0	0	0	0.38	2.15	3.04	0	0	0	4913	--	--	--	--	--	--	--	--	--	--	--	--	--	--	--	--	--	--	PF00651	BTB/POZ domain	--	--	GO:0005515	protein binding	--	--	--	--	UP	10.349	6.74e-09	estscan,start:1926 end:4913
Cluster-18140.0	60	345	467	2	2	0	0.43	2.48	3.36	0.01	0.01	0	5028	1026756541	OAE18970.1	1287	2.1e-138	hypothetical protein AXG93_461s1110 [Marchantia polymorpha subsp. ruderalis]	XM_027347661.1	XM_027347661	96	2.56e-39	PREDICTED: Dermatophagoides pteronyssinus phosphatidylinositol 4-kinase alpha-like (LOC113797302), mRNA	K00888	PI4KA	phosphatidylinositol 4-kinase A	http://www.genome.jp/dbget-bin/www_bget?ko:K00888	O02811	3665	0	Phosphatidylinositol 4-kinase alpha OS=Bos taurus OX=9913 GN=PI4KA PE=2 SV=2	PF06102//PF05188	rRNA biogenesis protein RRP36//MutS domain II	GO:0000469//GO:0006298	cleavage involved in rRNA processing//mismatch repair	GO:0030983//GO:0005524	mismatched DNA binding//ATP binding	--	--	KOG0902	Phosphatidylinositol 4-kinase	UP	7.7436	6.8e-09	blast,frame:2 start:2 end:4330
Cluster-41647.29526	70	607	897	4	1	0	0.57	4.99	7.38	0.03	0.01	0	4428	255070699	XP_002507431.1	656	2.8e-65	Neurotransmitter:Sodium symporter family [Micromonas commoda]	XM_030715732.1	XM_030715732	38	3.93e-07	PREDICTED: Drosophila novamexicana sodium- and chloride-dependent GABA transporter 1 (LOC115770453), transcript variant X2, mRNA	-	-	-	http://www.genome.jp/dbget-bin/www_bget?ko:-	P31646	1638	1.4e-180	Sodium- and chloride-dependent GABA transporter 2 OS=Rattus norvegicus OX=10116 GN=Slc6a13 PE=1 SV=1	PF00209//PF10717	Sodium:neurotransmitter symporter family//Occlusion-derived virus envelope protein ODV-E18	--	--	--	--	GO:0019031//GO:0016021	viral envelope//integral component of membrane	KOG3660	Sodium-neurotransmitter symporter	UP	8.3254	6.88e-09	blast,frame:2 start:1058 end:3037
Cluster-41647.13896	80.57	105.76	195.3	2.17	4	0	3.62	4.67	8.7	0.09	0.18	0	1018	1562664978	RXI05353.1	439	9.2e-41	hypothetical protein DVH24_006610, partial [Malus domestica]	--	--	--	--	--	-	-	-	http://www.genome.jp/dbget-bin/www_bget?ko:-	Q9SKK2	289	8.7e-25	Receptor like protein 21 OS=Arabidopsis thaliana OX=3702 GN=RLP21 PE=3 SV=2	PF00560//PF13855//PF05297//PF13516	Leucine Rich Repeat//Leucine rich repeat//Herpesvirus latent membrane protein 1 (LMP1)//Leucine Rich repeat	GO:0019087	transformation of host cell by virus	GO:0005515	protein binding	GO:0016021	integral component of membrane	--	--	UP	5.951	6.89e-09	estscan,start:1 end:1018
Cluster-41647.7967	71	705	755	0	1	0	1.21	12.11	12.99	0	0.02	0	2245	302847685	XP_002955376.1	250	1.7e-18	hypothetical protein VOLCADRAFT_109965 [Volvox carteri f. nagariensis]	XM_018464524.1	XM_018464524	50	4.22e-14	PREDICTED: Agrilus planipennis myelin expression factor 2 (LOC108733385), mRNA	-	-	-	http://www.genome.jp/dbget-bin/www_bget?ko:-	Q9D0E1	423	5.5e-40	Heterogeneous nuclear ribonucleoprotein M OS=Mus musculus OX=10090 GN=Hnrnpm PE=1 SV=3	PF00076	RNA recognition motif. (a.k.a. RRM, RBD, or RNP domain)	--	--	GO:0003676	nucleic acid binding	--	--	KOG4212	RNA-binding protein hnRNP-M	UP	10.4	6.96e-09	blast,frame:-2 start:2142 end:307
Cluster-41647.9950	90	610	793	3	0	0	0.92	6.33	8.23	0.03	0	0	3560	326496380	BAJ94652.1	1258	3.5e-135	predicted protein [Hordeum vulgare subsp. vulgare]	XM_030901534.1	XM_030901534	174	7.88e-83	PREDICTED: Sitophilus oryzae guanine nucleotide-binding protein subunit beta-1 (LOC115883211), mRNA	K04536	GNB1	guanine nucleotide-binding protein G(I)/G(S)/G(T) subunit beta-1	http://www.genome.jp/dbget-bin/www_bget?ko:K04536	O45040	1648	7.9e-182	Guanine nucleotide-binding protein G(I)/G(S)/G(T) subunit beta-1 OS=Homarus americanus OX=6706 GN=GBETA1 PE=2 SV=1	PF09198//PF00879//PF00400	Bacteriophage T4 beta-glucosyltransferase//Defensin propeptide//WD domain, G-beta repeat	GO:0099018//GO:0006952	restriction-modification system evasion by virus//defense response	GO:0033821//GO:0005515	DNA beta-glucosyltransferase activity//protein binding	--	--	KOG0286	G-protein beta subunit	UP	8.9826	6.98e-09	blast,frame:-1 start:2171 end:1137
Cluster-41647.33695	72	496	688	1	1	0	0.94	6.56	9.11	0.01	0.01	0	2842	1395920160	PXF46168.1	679	3.8e-68	Very-long-chain enoyl-CoA reductase [Gracilariopsis chorda]	--	--	--	--	--	K10258	TER, TSC13, CER10	very-long-chain enoyl-CoA reductase	http://www.genome.jp/dbget-bin/www_bget?ko:K10258	Q9N5Y2	901	2.6e-95	Probable very-long-chain enoyl-CoA reductase art-1 OS=Caenorhabditis elegans OX=6239 GN=art-1 PE=3 SV=1	PF00240//PF02544	Ubiquitin family//3-oxo-5-alpha-steroid 4-dehydrogenase	GO:0006629	lipid metabolic process	GO:0005515//GO:0016627	protein binding//oxidoreductase activity, acting on the CH-CH group of donors	--	--	KOG1639	Steroid reductase required for elongation of the very long chain fatty acids	UP	9.2578	6.98e-09	blast,frame:3 start:93 end:1091
Cluster-41647.29703	449	329.12	3261.87	21	8.97	4	13.49	9.85	98.02	0.61	0.27	0.12	1390	661888647	CDP07683.1	406	8.4e-37	unnamed protein product [Coffea canephora]	--	--	--	--	--	-	-	-	http://www.genome.jp/dbget-bin/www_bget?ko:-	--	--	--	--	PF00130//PF05476	Phorbol esters/diacylglycerol binding domain (C1 domain)//PET122	GO:0070131//GO:0006446//GO:0035556	positive regulation of mitochondrial translation//regulation of translational initiation//intracellular signal transduction	GO:0003743	translation initiation factor activity	GO:0005743//GO:0005840	mitochondrial inner membrane//ribosome	--	--	UP	6.9273	7.03e-09	estscan,start:1 end:74
Cluster-41647.32904	67	225	692	0	0	0	0.46	1.55	4.77	0	0	0	5233	--	--	--	--	--	--	--	--	--	--	-	-	-	http://www.genome.jp/dbget-bin/www_bget?ko:-	Q8BPU7	366	5.2e-33	Engulfment and cell motility protein 1 OS=Mus musculus OX=10090 GN=Elmo1 PE=1 SV=2	--	--	--	--	--	--	--	--	--	--	UP	10.737	7.16e-09	blast,frame:3 start:153 end:1001
Cluster-41647.35405	48	390	461	0	0	0	0.36	2.97	3.51	0	0	0	4758	635363539	CCI47938.1	351	6.9e-30	unnamed protein product [Albugo candida]	--	--	--	--	--	K19589	N6AMT1	release factor glutamine methyltransferase	http://www.genome.jp/dbget-bin/www_bget?ko:K19589	Q5R803	608	4.1e-61	FERM domain-containing protein 3 OS=Pongo abelii OX=9601 GN=FRMD3 PE=2 SV=1	PF08241//PF05958//PF05175	Methyltransferase domain//tRNA (Uracil-5-)-methyltransferase//Methyltransferase small domain	GO:0009451//GO:0006396	RNA modification//RNA processing	GO:0008168//GO:0008173	methyltransferase activity//RNA methyltransferase activity	--	--	--	--	UP	10.595	7.16e-09	blast,frame:2 start:2 end:655
Cluster-41647.32959	75	559	755	0	1	0	1	7.51	10.15	0	0.01	0	2803	384250036	EIE23516.1	1634	6.9e-179	V0/A0 complex, 116-kDa subunit of ATPase [Coccomyxa subellipsoidea C-169]	LK995574.1	LK995574	50	5.28e-14	Rhabditophanes sp. KR3021 genome assembly Rhabditophanes_sp_KR3021 ,scaffold RSKR_contig0000008	K02154	ATPeV0A, ATP6N	V-type H+-transporting ATPase subunit a	http://www.genome.jp/dbget-bin/www_bget?ko:K02154	Q29466	2543	1e-285	V-type proton ATPase 116 kDa subunit a isoform 1 OS=Bos taurus OX=9913 GN=ATP6V0A1 PE=2 SV=1	PF01496	V-type ATPase 116kDa subunit family	GO:1902600	proton transmembrane transport	GO:0015078	proton transmembrane transporter activity	GO:0033179	proton-transporting V-type ATPase, V0 domain	KOG2189	Vacuolar H+-ATPase V0 sector, subunit a	UP	10.262	7.18e-09	blast,frame:-2 start:2676 end:124
Cluster-41647.20496	60	458	741	2	1	0	0.46	3.55	5.73	0.02	0.01	0	4690	326508656	BAJ95850.1	1004	1.3e-105	predicted protein [Hordeum vulgare subsp. vulgare]	XM_027342503.1	XM_027342503	200	3.66e-97	PREDICTED: Dermatophagoides pteronyssinus putative polypeptide N-acetylgalactosaminyltransferase 9 (LOC113792595), mRNA	K00710	GALNT	polypeptide N-acetylgalactosaminyltransferase	http://www.genome.jp/dbget-bin/www_bget?ko:K00710	Q8MRC9	1711	5.1e-189	Putative polypeptide N-acetylgalactosaminyltransferase 9 OS=Drosophila melanogaster OX=7227 GN=Pgant9 PE=1 SV=2	PF00010//PF05470	Helix-loop-helix DNA-binding domain//Eukaryotic translation initiation factor 3 subunit 8 N-terminus	GO:0006446//GO:0006413	regulation of translational initiation//translational initiation	GO:0031369//GO:0003743//GO:0046983	translation initiation factor binding//translation initiation factor activity//protein dimerization activity	GO:0005852//GO:0005840	eukaryotic translation initiation factor 3 complex//ribosome	KOG3736	Polypeptide N-acetylgalactosaminyltransferase	UP	8.7047	7.18e-09	blast,frame:-2 start:3378 end:628
Cluster-41647.8621	89	761.99	918	0	2	0	1.7	14.59	17.61	0	0.04	0	2038	1426017620	GBG79328.1	591	4.4e-58	hypothetical protein CBR_g29478 [Chara braunii]	EU247208.1	EU247208	102	4.74e-43	Lycosa singoriensis clone LSsin1728 cofilin mRNA, complete cds	K07512	MECR, NRBF1	mitochondrial trans-2-enoyl-CoA reductase	http://www.genome.jp/dbget-bin/www_bget?ko:K07512	Q28GQ2	690	5.5e-71	Enoyl-[acyl-carrier-protein] reductase, mitochondrial OS=Xenopus tropicalis OX=8364 GN=mecr PE=2 SV=1	PF00241//PF00107//PF10717//PF08240//PF02671	Cofilin/tropomyosin-type actin-binding protein//Zinc-binding dehydrogenase//Occlusion-derived virus envelope protein ODV-E18//Alcohol dehydrogenase GroES-like domain//Paired amphipathic helix repeat	GO:0006355//GO:0055114	regulation of transcription, DNA-templated//oxidation-reduction process	GO:0003779	actin binding	GO:0019031	viral envelope	KOG0025	Zn2+-binding dehydrogenase (nuclear receptor binding factor-1)	UP	9.7154	7.19e-09	blast,frame:2 start:29 end:1099
Cluster-41647.6713	52	219	254	0	0	0	0.78	3.32	3.86	0	0	0	2510	--	--	--	--	--	--	--	--	--	--	--	--	--	--	--	--	--	--	PF03116	NQR2, RnfD, RnfE family	GO:0055085	transmembrane transport	--	--	GO:0016020	membrane	--	--	UP	9.818	7.44e-09	estscan,start:384 end:2085
Cluster-41647.5710	45	516	503.47	0	0	0	2.59	28.96	28.55	0	0	0	852	--	--	--	--	--	--	--	--	--	--	--	--	--	--	P08934	136	4e-07	Kininogen-1 OS=Rattus norvegicus OX=10116 GN=Kng1 PE=2 SV=1	PF00031//PF16845	Cystatin domain//Aspartic acid proteinase inhibitor	--	--	GO:0004869	cysteine-type endopeptidase inhibitor activity	--	--	--	--	UP	10.835	7.54e-09	blast,frame:-3 start:664 end:218
Cluster-41647.4565	64	614	694	4	2	0	0.53	5.16	5.83	0.03	0.02	0	4336	--	--	--	--	--	--	--	--	--	--	--	--	--	--	Q569T7	203	3.5e-14	Sodium-dependent glucose transporter 1 OS=Xenopus laevis OX=8355 GN=mfsd4b PE=2 SV=1	PF02932//PF03261//PF07690//PF05053//PF02724	Neurotransmitter-gated ion-channel transmembrane region//Cyclin-dependent kinase 5 activator protein//Major Facilitator Superfamily//Menin//CDC45-like protein	GO:0006270//GO:0055085//GO:0006811	DNA replication initiation//transmembrane transport//ion transport	GO:0061575//GO:0022857	cyclin-dependent protein serine/threonine kinase activator activity//transmembrane transporter activity	GO:0005634//GO:0016533//GO:0016021	nucleus//protein kinase 5 complex//integral component of membrane	--	--	UP	7.8466	7.55e-09	blast,frame:3 start:2142 end:4115
Cluster-30445.0	49	328	394	0	0	0	0.66	4.46	5.36	0	0	0	2773	1315701057	PKU65747.1	144	4e-06	hypothetical protein MA16_Dca022168 [Dendrobium catenatum]	--	--	--	--	--	K13210	FUBP	far upstream element-binding protein	http://www.genome.jp/dbget-bin/www_bget?ko:K13210	--	--	--	--	PF09005//PF07650//PF00013	Domain of unknown function (DUF1897)//KH domain//KH domain	GO:0006355	regulation of transcription, DNA-templated	GO:0003723//GO:0003676	RNA binding//nucleic acid binding	--	--	KOG1676	K-homology type RNA binding proteins	UP	10.373	7.57e-09	blast,frame:-1 start:2464 end:1547
Cluster-15595.0	172.99	162	218	25	33	13	2.4	2.27	3.06	0.34	0.47	0.18	2698	1201318326	OVA17412.1	1391	9.9e-151	Armadillo [Macleaya cordata]	--	--	--	--	--	-	-	-	http://www.genome.jp/dbget-bin/www_bget?ko:-	O22193	238	1.9e-18	U-box domain-containing protein 4 OS=Arabidopsis thaliana OX=3702 GN=PUB4 PE=1 SV=3	PF03224//PF02985//PF00514	V-ATPase subunit H//HEAT repeat//Armadillo/beta-catenin-like repeat	GO:0006119//GO:1902600	oxidative phosphorylation//proton transmembrane transport	GO:0005515//GO:0046961	protein binding//proton-transporting ATPase activity, rotational mechanism	GO:0000221	vacuolar proton-transporting V-type ATPase, V1 domain	--	--	UP	2.9081	7.61e-09	blast,frame:3 start:759 end:2462
Cluster-41647.7772	48	361	395	0	0	0	0.27	2.07	2.26	0	0	0	6252	255072339	XP_002499844.1	502	2.8e-47	alpha-2 macroglobulin family-like protein [Micromonas commoda]	--	--	--	--	--	K06530	CD109	CD109 antigen	http://www.genome.jp/dbget-bin/www_bget?ko:K06530	Q6YHK3	1078	1.7e-115	CD109 antigen OS=Homo sapiens OX=9606 GN=CD109 PE=1 SV=2	PF07677//PF00207//PF01835//PF00057//PF02402//PF07678	A-macroglobulin receptor binding domain//Alpha-2-macroglobulin family//MG2 domain//Low-density lipoprotein receptor domain class A//Lysis protein//A-macroglobulin TED domain	GO:0009405//GO:0019835	pathogenesis//cytolysis	GO:0005515//GO:0004866	protein binding//endopeptidase inhibitor activity	GO:0005576//GO:0005615//GO:0019867	extracellular region//extracellular space//outer membrane	KOG1366	Alpha-macroglobulin	UP	10.432	7.65e-09	blast,frame:-1 start:5049 end:538
Cluster-41647.6009	72	597	836.45	0	1	0	4.01	32.46	45.92	0	0.06	0	872	326488421	BAJ93879.1	569	6.6e-56	predicted protein [Hordeum vulgare subsp. vulgare]	--	--	--	--	--	K02882	RP-L18Ae, RPL18A	large subunit ribosomal protein L18Ae	http://www.genome.jp/dbget-bin/www_bget?ko:K02882	P41093	575	5.1e-58	60S ribosomal protein L18a OS=Drosophila melanogaster OX=7227 GN=RpL18A PE=1 SV=1	PF01775	Ribosomal proteins 50S-L18Ae/60S-L20/60S-L18A	GO:0006412//GO:0042254	translation//ribosome biogenesis	GO:0003735	structural constituent of ribosome	GO:0005840	ribosome	KOG0829	60S ribosomal protein L18A	UP	10.379	7.65e-09	blast,frame:-2 start:736 end:170
Cluster-41647.21166	438	3867	5585	18	14	0	7.49	66.54	96.26	0.3	0.24	0	2241	545370525	XP_005649894.1	1250	1.8e-134	polyadenylate binding protein [Coccomyxa subellipsoidea C-169]	MF771628.1	MF771628	59	4.18e-19	Microborus angustus voucher CtMic03 polyadenylate-binding protein 1 (PABP1) gene, partial cds	K13126	PABPC	polyadenylate-binding protein	http://www.genome.jp/dbget-bin/www_bget?ko:K13126	P20965	1487	2.3e-163	Polyadenylate-binding protein 1-A OS=Xenopus laevis OX=8355 GN=pabpc1-a PE=1 SV=3	PF08777//PF00658//PF16367//PF00076	RNA binding motif//Poly-adenylate binding protein, unique domain//RNA recognition motif//RNA recognition motif. (a.k.a. RRM, RBD, or RNP domain)	--	--	GO:0003676//GO:0003723	nucleic acid binding//RNA binding	--	--	KOG0123	Polyadenylate-binding protein (RRM superfamily)	UP	8.3078	7.69e-09	blast,frame:2 start:110 end:2143
Cluster-41647.10036	64	517	750	3	3	0	1.34	10.83	15.75	0.06	0.06	0	1883	428173339	EKX42242.1	483	1.3e-45	hypothetical protein GUITHDRAFT_111803 [Guillardia theta CCMP2712]	XM_010308018.1	XM_010308018	61	2.71e-20	PREDICTED: Balearica regulorum gibbericeps 40S ribosomal protein S27-like (LOC104629596), partial mRNA	K12602	WDR61, REC14, SKI8	WD repeat-containing protein 61	http://www.genome.jp/dbget-bin/www_bget?ko:K12602	Q6P5M2	644	1.1e-65	WD repeat-containing protein 61 OS=Danio rerio OX=7955 GN=wdr61 PE=2 SV=1	PF01667//PF00400	Ribosomal protein S27//WD domain, G-beta repeat	GO:0006412//GO:0042254	translation//ribosome biogenesis	GO:0005515//GO:0003735	protein binding//structural constituent of ribosome	GO:0005840	ribosome	KOG1779	40s ribosomal protein S27	UP	7.7841	7.69e-09	blast,frame:-1 start:692 end:519|blast,frame:-3 start:1578 end:802
Cluster-41647.33572	54	682	806	3	2	0	0.91	11.56	13.69	0.05	0.03	0	2271	255076311	XP_002501830.1	1572	8.6e-172	predicted protein [Micromonas commoda]	XM_027342174.1	XM_027342174	88	3.21e-35	PREDICTED: Dermatophagoides pteronyssinus DNA repair protein RAD50-like (LOC113792259), mRNA	K09496	CCT4	T-complex protein 1 subunit delta	http://www.genome.jp/dbget-bin/www_bget?ko:K09496	Q9NB32	1776	7.2e-197	T-complex protein 1 subunit delta OS=Ochlerotatus triseriatus OX=7162 PE=2 SV=1	PF00118	TCP-1/cpn60 chaperonin family	--	--	GO:0005524	ATP binding	--	--	KOG0358	Chaperonin complex component, TCP-1 delta subunit (CCT4)	UP	8.2674	8.02e-09	blast,frame:-3 start:2047 end:395
Cluster-41647.9836	216	279	483	32	15	29	6.78	8.71	15.15	0.97	0.47	0.91	1342	--	--	--	--	--	--	--	--	--	--	--	--	--	--	--	--	--	--	--	--	--	--	--	--	--	--	--	--	UP	3.6126	8.17e-09	estscan,start:1 end:1242
Cluster-41647.8703	128	1087	1406.01	9.07	3	0	2.42	20.66	26.78	0.17	0.06	0	2051	1377599803	GBG32772.1	179	2.6e-10	RNA-binding protein, putative [Hondaea fermentalgiana]	--	--	--	--	--	K03258	EIF4B	translation initiation factor 4B	http://www.genome.jp/dbget-bin/www_bget?ko:K03258	Q5RBR8	233	5.4e-18	Eukaryotic translation initiation factor 4H OS=Pongo abelii OX=9601 GN=EIF4H PE=2 SV=1	PF00076//PF00204//PF01338//PF10450	RNA recognition motif. (a.k.a. RRM, RBD, or RNP domain)//DNA gyrase B//Bacillus thuringiensis toxin//POC1 chaperone	GO:0009405//GO:0006265//GO:0043248	pathogenesis//DNA topological change//proteasome assembly	GO:0003677//GO:0005524//GO:0003918//GO:0003676	DNA binding//ATP binding//DNA topoisomerase type II (double strand cut, ATP-hydrolyzing) activity//nucleic acid binding	GO:0005576	extracellular region	KOG0118	FOG: RRM domain	UP	7.8207	8.19e-09	blast,frame:-3 start:1599 end:541
Cluster-41647.7647	46	533	392	0	0	0	0.39	4.52	3.32	0	0	0	4301	412987719	CCO20554.1	257	4.9e-19	PREDICTED: similar to Zinc finger protein 271 (Zinc finger protein 7) (HZF7) (Zinc finger protein ZNFphex133) (Epstein-Barr virus-induced zinc finger protein) (ZNF-EB) (CT-ZFP48) (Zinc finger protein [Bathycoccus prasinos]	--	--	--	--	--	-	-	-	http://www.genome.jp/dbget-bin/www_bget?ko:-	Q24292	610	2.2e-61	Protein dachsous OS=Drosophila melanogaster OX=7227 GN=ds PE=1 SV=3	PF06682//PF01155//PF00028//PF01226//PF00096//PF06467	SOCE-associated regulatory factor of calcium homoeostasis//Hydrogenase/urease nickel incorporation, metallochaperone, hypA//Cadherin domain//Formate/nitrite transporter//Zinc finger, C2H2 type//MYM-type Zinc finger with FCS sequence motif	GO:0007156//GO:0051604//GO:2001256//GO:0055085	homophilic cell adhesion via plasma membrane adhesion molecules//protein maturation//regulation of store-operated calcium entry//transmembrane transport	GO:0005509//GO:0003676//GO:0022857//GO:0016151//GO:0008270	calcium ion binding//nucleic acid binding//transmembrane transporter activity//nickel cation binding//zinc ion binding	GO:0030176//GO:0016020	integral component of endoplasmic reticulum membrane//membrane	--	--	UP	10.699	8.19e-09	estscan,start:1 end:2389
Cluster-41647.22064	119.45	155.48	324.31	9	1	5	52.17	53.96	120.7	3.07	0.36	1.83	333	--	--	--	--	--	--	--	--	--	--	--	--	--	--	--	--	--	--	PF03294	RNA polymerase-associated transcription specificity factor, Rap94	--	--	GO:0003700	DNA-binding transcription factor activity	GO:0005667	transcription regulator complex	--	--	UP	5.2813	8.19e-09	--
Cluster-41647.31656	56	550	745.6	1	2	0	0.25	2.48	3.36	0	0.01	0	7875	348671085	EGZ10906.1	868	1.3e-89	hypothetical protein PHYSODRAFT_337677 [Phytophthora sojae]	XM_029111465.1	XM_029111465	173	6.3e-82	PREDICTED: Metaseiulus occidentalis voltage-dependent calcium channel type A subunit alpha-1-like (LOC100901544), mRNA	-	-	-	http://www.genome.jp/dbget-bin/www_bget?ko:-	C9D7C2	2827	0	Voltage-dependent calcium channel type A subunit alpha-1 OS=Apis mellifera OX=7460 GN=CAC PE=2 SV=1	PF12162//PF13405//PF00036//PF00520	STAT1 TAZ2 binding domain//EF-hand domain//EF hand//Ion transport protein	GO:0006811//GO:0055085	ion transport//transmembrane transport	GO:0005509//GO:0003700//GO:0005216	calcium ion binding//DNA-binding transcription factor activity//ion channel activity	GO:0005667//GO:0016020	transcription regulator complex//membrane	KOG2301	Voltage-gated Ca2+ channels, alpha1 subunits	UP	8.7748	8.19e-09	blast,frame:2 start:2 end:7753
Cluster-41647.11323	123	620	1093.98	6	6	0	2.27	11.49	20.31	0.11	0.11	0	2098	--	--	--	--	--	--	--	--	--	--	--	--	--	--	P19351	477	2.8e-46	Troponin T, skeletal muscle OS=Drosophila melanogaster OX=7227 GN=up PE=1 SV=3	PF00992//PF04061	Troponin//ORMDL family	--	--	--	--	GO:0005861//GO:0016021//GO:0005789	troponin complex//integral component of membrane//endoplasmic reticulum membrane	KOG3634	Troponin	UP	7.2661	8.22e-09	blast,frame:3 start:396 end:1646
Cluster-41647.8068	78	319	584	4	1	0	0.6	2.49	4.56	0.03	0.01	0	4652	--	--	--	--	--	--	--	--	--	--	--	--	--	--	--	--	--	--	--	--	--	--	--	--	--	--	--	--	UP	7.6367	8.22e-09	estscan,start:3197 end:270; minus strand
Cluster-41647.15857	85	759.07	1071	6	2	0	1.66	14.88	21.04	0.11	0.04	0	1996	604345192	EYU43803.1	1572	7.5e-172	hypothetical protein MIMGU_mgv1a003536mg [Erythranthe guttata]	XM_017299042.1	XM_017299042	101	1.67e-42	PREDICTED: Drosophila miranda 60 kDa heat shock protein homolog 2, mitochondrial (LOC108163633), mRNA	K04077	groEL, HSPD1	chaperonin GroEL	http://www.genome.jp/dbget-bin/www_bget?ko:K04077	O02649	1953	1.9e-217	Heat shock protein 60A OS=Drosophila melanogaster OX=7227 GN=Hsp60A PE=1 SV=3	PF00118//PF00285	TCP-1/cpn60 chaperonin family//Citrate synthase, C-terminal domain	--	--	GO:0046912//GO:0005524	transferase activity, transferring acyl groups, acyl groups converted into alkyl on transfer//ATP binding	--	--	KOG0356	Mitochondrial chaperonin, Cpn60/Hsp60p	UP	7.9408	8.45e-09	blast,frame:-2 start:1809 end:49
Cluster-41647.6550	50	252	225	0	0	0	3.05	14.97	13.52	0	0	0	818	--	--	--	--	--	--	--	--	--	--	--	--	--	--	--	--	--	--	PF01607	Chitin binding Peritrophin-A domain	--	--	GO:0008061	chitin binding	GO:0005576	extracellular region	--	--	UP	9.82	8.63e-09	estscan,start:1 end:698
Cluster-41647.17503	130	1815	3028.25	6	8	0	1.35	18.99	31.7	0.06	0.08	0	3531	--	--	--	--	--	--	--	--	--	--	--	--	--	--	--	--	--	--	PF05843//PF03153//PF07565//PF04636//PF11744//PF12326//PF02932//PF00006//PF15957//PF03348	Suppressor of forked protein (Suf)//Transcription factor IIA, alpha/beta subunit//Band 3 cytoplasmic domain//PA26 p53-induced protein (sestrin)//Aluminium activated malate transporter//N-glycosylation protein//Neurotransmitter-gated ion-channel transmembrane region//ATP synthase alpha/beta family, nucleotide-binding domain//Commissureless//Serine incorporator (Serinc)	GO:1901031//GO:0034599//GO:0007411//GO:0006397//GO:0006820//GO:0015743//GO:0006367//GO:0006811	regulation of response to reactive oxygen species//cellular response to oxidative stress//axon guidance//mRNA processing//anion transport//malate transport//transcription initiation from RNA polymerase II promoter//ion transport	GO:0008509//GO:0005524	anion transmembrane transporter activity//ATP binding	GO:0005634//GO:0016020//GO:0005672//GO:0016021//GO:0005789	nucleus//membrane//transcription factor TFIIA complex//integral component of membrane//endoplasmic reticulum membrane	--	--	UP	8.4761	8.69e-09	estscan,start:1771 end:1604; minus strand
Cluster-35258.1	69	589	932	4	3	0	0.51	4.41	6.98	0.03	0.02	0	4836	551643239	XP_005824414.1	1767	4.5e-194	hypothetical protein GUITHDRAFT_97260 [Guillardia theta CCMP2712]	XM_022083373.1	XM_022083373	198	4.89e-96	PREDICTED: Zootermopsis nevadensis V-type proton ATPase subunit B (LOC110839292), mRNA	K02147	ATPeV1B, ATP6B	V-type H+-transporting ATPase subunit B	http://www.genome.jp/dbget-bin/www_bget?ko:K02147	P31401	1848	6.9e-205	V-type proton ATPase subunit B OS=Manduca sexta OX=7130 GN=VHA55 PE=2 SV=1	PF00006//PF02874//PF01991//PF01151	ATP synthase alpha/beta family, nucleotide-binding domain//ATP synthase alpha/beta family, beta-barrel domain//ATP synthase (E/31 kDa) subunit//GNS1/SUR4 family	GO:1902600//GO:0006119//GO:0046034	proton transmembrane transport//oxidative phosphorylation//ATP metabolic process	GO:0005524//GO:0046961	ATP binding//proton-transporting ATPase activity, rotational mechanism	GO:0016021//GO:0033178	integral component of membrane//proton-transporting two-sector ATPase complex, catalytic domain	KOG1351	Vacuolar H+-ATPase V1 sector, subunit B	UP	7.8347	8.76e-09	blast,frame:-1 start:4650 end:2494
Cluster-41647.8310	66	747.42	735	1	0	0	0.36	4.14	4.07	0.01	0	0	6461	1060604832	AOG62271.1	178	1.1e-09	trimodular nonagonal cadherin, partial [Eurychasma dicksonii]	--	--	--	--	--	--	--	--	--	Q9VW71	745	7.3e-77	Fat-like cadherin-related tumor suppressor homolog OS=Drosophila melanogaster OX=7227 GN=kug PE=2 SV=3	PF00028//PF02419//PF00001	Cadherin domain//PsbL protein//7 transmembrane receptor (rhodopsin family)	GO:0007156//GO:0007186//GO:0015979	homophilic cell adhesion via plasma membrane adhesion molecules//G protein-coupled receptor signaling pathway//photosynthesis	GO:0004930//GO:0005509	G protein-coupled receptor activity//calcium ion binding	GO:0009539//GO:0009523//GO:0016020//GO:0016021	photosystem II reaction center//photosystem II//membrane//integral component of membrane	KOG1219	Uncharacterized conserved protein, contains laminin, cadherin and EGF domains	UP	10.414	8.76e-09	blast,frame:3 start:690 end:6041
Cluster-41647.7862	54	619	641	1	2	0	0.26	3.04	3.15	0	0.01	0	7247	1173952007	OQR99767.1	268	4.4e-20	hypothetical protein ACHHYP_04479 [Achlya hypogyna]	--	--	--	--	--	-	-	-	http://www.genome.jp/dbget-bin/www_bget?ko:-	O97394	1638	2.3e-180	Protein sidekick OS=Drosophila melanogaster OX=7227 GN=sdk PE=1 SV=2	PF01363//PF00041//PF16656	FYVE zinc finger//Fibronectin type III domain//Purple acid Phosphatase, N-terminal domain	GO:0006771//GO:0019497	riboflavin metabolic process//hexachlorocyclohexane metabolic process	GO:0003993//GO:0046872//GO:0005515	acid phosphatase activity//metal ion binding//protein binding	--	--	KOG3510	FOG: Immunoglobulin C-2 Type/fibronectin type III domains	UP	8.7297	8.79e-09	blast,frame:2 start:995 end:5539
Cluster-41647.7648	59	428	178.49	0	0	0	6.69	45.54	19.4	0	0	0	561	--	--	--	--	--	--	--	--	--	--	--	--	--	--	--	--	--	--	--	--	--	--	--	--	--	--	--	--	UP	10.146	8.95e-09	estscan,start:1 end:406
Cluster-41647.6057	95	509	648	0	3	0	7.12	36.76	47.44	0	0.22	0	715	551667403	XP_005836462.1	550	8.7e-54	hypothetical protein GUITHDRAFT_93413, partial [Guillardia theta CCMP2712]	KC767854.1	KC767854	59	1.29e-19	Macrobrachium rosenbergii nm23 mRNA, complete cds	K00940	ndk, NME	nucleoside-diphosphate kinase	http://www.genome.jp/dbget-bin/www_bget?ko:K00940	Q6XI71	579	1.4e-58	Nucleoside diphosphate kinase (Fragment) OS=Drosophila yakuba OX=7245 GN=awd PE=2 SV=1	--	--	--	--	--	--	--	--	KOG0888	Nucleoside diphosphate kinase	UP	8.6309	9.03e-09	blast,frame:-1 start:562 end:80
Cluster-41647.722	2	4	1	153	110	806.54	0.02	0.04	0.01	1.38	1.03	7.49	3968	--	--	--	--	--	--	--	--	--	--	--	--	--	--	--	--	--	--	--	--	--	--	--	--	--	--	--	--	DOWN	-7.4834	9.12e-09	estscan,start:3968 end:3577; minus strand
Cluster-41647.7264	44	437	522	0	0	0	0.35	3.51	4.2	0	0	0	4524	971514383	GAQ83805.1	347	1.9e-29	eukaryotic translation initiation factor 4G [Klebsormidium nitens]	--	--	--	--	--	K03260	EIF4G	translation initiation factor 4G	http://www.genome.jp/dbget-bin/www_bget?ko:K03260	Q80XI3	465	1.5e-44	Eukaryotic translation initiation factor 4 gamma 3 OS=Mus musculus OX=10090 GN=Eif4g3 PE=1 SV=2	PF02854	MIF4G domain	--	--	GO:0003723//GO:0005515	RNA binding//protein binding	--	--	KOG0401	Translation initiation factor 4F, ribosome/mRNA-bridging subunit (eIF-4G)	UP	10.753	9.18e-09	blast,frame:-2 start:4214 end:3
Cluster-41647.5057	93	679	973	5	5	0	5.13	36.62	52.99	0.26	0.27	0	877	672122850	XP_008784768.1	560	7.4e-55	60S ribosomal protein L18-2-like [Phoenix dactylifera]	--	--	--	--	--	K02883	RP-L18e, RPL18	large subunit ribosomal protein L18e	http://www.genome.jp/dbget-bin/www_bget?ko:K02883	Q9VS34	578	2.3e-58	60S ribosomal protein L18 OS=Drosophila melanogaster OX=7227 GN=RpL18 PE=1 SV=1	--	--	--	--	--	--	--	--	KOG1714	60s ribosomal protein L18	UP	7.4495	9.18e-09	blast,frame:-1 start:646 end:77
Cluster-41647.10180	41	577	618	0	0	0	0.86	12.07	12.96	0	0	0	1886	452823046	EME30060.1	452	5.3e-42	microtubule-associated protein, RP/EB family [Galdieria sulphuraria]	XM_026285877.1	XM_026285877	44	7.64e-11	PREDICTED: Carassius auratus microtubule-associated protein RP/EB family member 3-like (LOC113117295), transcript variant X2, mRNA	K10436	MAPRE	microtubule-associated protein, RP/EB family	http://www.genome.jp/dbget-bin/www_bget?ko:K10436	Q61166	631	3.5e-64	Microtubule-associated protein RP/EB family member 1 OS=Mus musculus OX=10090 GN=Mapre1 PE=1 SV=3	PF00307//PF03271	Calponin homology (CH) domain//EB1-like C-terminal motif	--	--	GO:0008017//GO:0005515	microtubule binding//protein binding	GO:0045298	tubulin complex	KOG3000	Microtubule-binding protein involved in cell cycle control	UP	11.053	9.18e-09	blast,frame:-1 start:1184 end:165
Cluster-41647.24067	617.9	826.77	1424.57	140.37	104.03	59.27	98.73	120.45	213.75	20.03	15.47	8.85	473	1248280935	ATG29963.1	449	3e-42	CYP94D83 [Taxus chinensis]	MF448642.1	MF448642	100	1.34e-42	Taxus wallichiana var. chinensis CYP94D83 mRNA, complete cds	-	-	-	http://www.genome.jp/dbget-bin/www_bget?ko:-	P98188	306	4.3e-27	Cytochrome P450 94A2 OS=Vicia sativa OX=3908 GN=CYP94A2 PE=2 SV=1	PF00067	Cytochrome P450	GO:0055114	oxidation-reduction process	GO:0005506//GO:0016705//GO:0020037	iron ion binding//oxidoreductase activity, acting on paired donors, with incorporation or reduction of molecular oxygen//heme binding	--	--	--	--	UP	3.2179	9.28e-09	estscan,start:1 end:473
Cluster-41647.4220	52	623	838.73	1	2	0	3.29	38.27	52.11	0.06	0.12	0	799	--	--	--	--	--	--	--	--	--	--	--	--	--	--	--	--	--	--	PF02798//PF00098//PF15291//PF04639	Glutathione S-transferase, N-terminal domain//Zinc knuckle//Dermcidin, antibiotic peptide//Baculoviral E56 protein, specific to ODV envelope	GO:0031640	killing of cells of other organism	GO:0008233//GO:0003676//GO:0005515//GO:0008270	peptidase activity//nucleic acid binding//protein binding//zinc ion binding	GO:0019031//GO:0005576	viral envelope//extracellular region	--	--	UP	8.939	9.31e-09	estscan,start:340 end:1; minus strand
Cluster-41647.32293	110	958	1388	7	5	0	1.06	9.31	13.49	0.07	0.05	0	3785	326497339	BAK02254.1	3202	0	predicted protein [Hordeum vulgare subsp. vulgare]	XM_027340870.1	XM_027340870	344	2.63e-177	PREDICTED: Dermatophagoides pteronyssinus ATP-citrate synthase-like (LOC113791137), mRNA	K01648	ACLY	ATP citrate (pro-S)-lyase	http://www.genome.jp/dbget-bin/www_bget?ko:K01648	P53396	3797	0	ATP-citrate synthase OS=Homo sapiens OX=9606 GN=ACLY PE=1 SV=3	PF00285//PF02629//PF00549	Citrate synthase, C-terminal domain//CoA binding domain//CoA-ligase	--	--	GO:0046912//GO:0003824//GO:0048037	transferase activity, transferring acyl groups, acyl groups converted into alkyl on transfer//catalytic activity//obsolete cofactor binding	--	--	KOG1254	ATP-citrate lyase	UP	7.6994	9.36e-09	blast,frame:1 start:271 end:3648
Cluster-41647.6307	92	689	761	0	3	0	0.87	6.58	7.26	0	0.03	0	3849	694453145	XP_009351356.1	1421	4.7e-154	PREDICTED: brain tumor protein-like, partial [Pyrus x bretschneideri]	MG611565.1	MG611565	179	1.42e-85	Eulichas sp. INB025 brain tumor protein (brat) gene, partial cds	--	--	--	--	Q8MQJ9	1382	5.9e-151	Brain tumor protein OS=Drosophila melanogaster OX=7227 GN=brat PE=1 SV=2	PF00558//PF01576//PF00643//PF01436	Vpu protein//Myosin tail//B-box zinc finger//NHL repeat	GO:0006812//GO:0032801//GO:0019076	cation transport//receptor catabolic process//viral release from host cell	GO:0005261//GO:0003774//GO:0008270//GO:0005515	cation channel activity//motor activity//zinc ion binding//protein binding	GO:0033644//GO:0016459	host cell membrane//myosin complex	KOG2177	Predicted E3 ubiquitin ligase	UP	8.9292	9.43e-09	blast,frame:2 start:1013 end:3580
Cluster-41647.6879	47	312	367	0	0	0	0.54	3.61	4.25	0	0	0	3216	1338425480	PON48607.1	166	1.3e-08	Protein Networked (NET), actin-binding (NAB) domain containing protein [Trema orientale]	--	--	--	--	--	-	-	-	http://www.genome.jp/dbget-bin/www_bget?ko:-	Q75AF5	164	8.5e-10	Golgin IMH1 OS=Ashbya gossypii (strain ATCC 10895 / CBS 109.51 / FGSC 9923 / NRRL Y-1056) OX=284811 GN=IMH1 PE=3 SV=2	--	--	--	--	--	--	--	--	--	--	UP	10.286	9.44e-09	blast,frame:2 start:833 end:3049
Cluster-41647.20069	7899.46	13700.8	19280.1	1275	313.47	742.39	241.19	416.41	588.66	37.82	9.65	22.75	1372	821092544	AKH04258.1	1166	6.2e-125	putative alcohol dehydrogenase [Taxus baccata]	KP178203.1	KP178203	461	0	Taxus baccata putative alcohol dehydrogenase mRNA, complete cds	-	-	-	http://www.genome.jp/dbget-bin/www_bget?ko:-	Q9SCU0	635	8.8e-65	Short-chain dehydrogenase reductase 2a OS=Arabidopsis thaliana OX=3702 GN=SDR2a PE=3 SV=1	--	--	--	--	--	--	--	--	--	--	UP	4.0956	9.44e-09	blast,frame:-3 start:1166 end:348
Cluster-41647.9327	80	895	1092	0	2	0	0.77	8.74	10.66	0	0.02	0	3767	--	--	--	--	--	--	--	--	--	--	--	--	--	--	Q80X50	160	2.9e-09	Ubiquitin-associated protein 2-like OS=Mus musculus OX=10090 GN=Ubap2l PE=1 SV=1	--	--	--	--	--	--	--	--	--	--	UP	9.9397	9.61e-09	blast,frame:1 start:334 end:3708
Cluster-41647.5785	44	424	449	0	0	0	1.76	16.74	17.84	0	0	0	1111	--	--	--	--	--	--	--	--	--	--	--	--	--	--	--	--	--	--	--	--	--	--	--	--	--	--	--	--	UP	10.622	9.62e-09	--
Cluster-41647.10118	104	1186.18	1235.72	1	6	0	3.82	43.17	45.24	0.04	0.22	0	1185	676382973	XP_009034765.1	301	1.1e-24	hypothetical protein AURANDRAFT_6555, partial [Aureococcus anophagefferens]	--	--	--	--	--	--	--	--	--	P45699	528	1.9e-52	Putative endoglucanase type K OS=Fusarium oxysporum OX=5507 PE=2 SV=1	PF02015//PF16048	Glycosyl hydrolase family 45//Frog antimicrobial peptide	GO:0006952//GO:0005985//GO:0005982//GO:0005975	defense response//sucrose metabolic process//starch metabolic process//carbohydrate metabolic process	GO:0008810	cellulase activity	GO:0005576	extracellular region	--	--	UP	8.4371	9.66e-09	blast,frame:3 start:24 end:860
Cluster-41647.20768	63	555	802	1	1	0	0.72	6.42	9.29	0.01	0.01	0	3215	1527511547	XP_027105457.1	1191	1.8e-127	probable pre-mRNA-splicing factor ATP-dependent RNA helicase DEAH9 isoform X2 [Coffea arabica]	--	--	--	--	--	K13117	DHX35	ATP-dependent RNA helicase DDX35	http://www.genome.jp/dbget-bin/www_bget?ko:K13117	Q9H5Z1	1397	9.1e-153	Probable ATP-dependent RNA helicase DHX35 OS=Homo sapiens OX=9606 GN=DHX35 PE=1 SV=2	PF00992//PF08653//PF00270//PF03047//PF04408	Troponin//DASH complex subunit Dam1//DEAD/DEAH box helicase//COMC family//Helicase associated domain (HA2)	GO:0008608//GO:0007165	attachment of spindle microtubules to kinetochore//signal transduction	GO:0005524//GO:0005186//GO:0004386//GO:0003676	ATP binding//pheromone activity//helicase activity//nucleic acid binding	GO:0005861//GO:0042729//GO:0072686	troponin complex//DASH complex//mitotic spindle	KOG0922	DEAH-box RNA helicase	UP	9.4378	9.8e-09	blast,frame:1 start:1 end:1827
Cluster-41647.28920	55	620	785	2	3	0	1.2	13.51	17.15	0.04	0.07	0	1820	--	--	--	--	--	--	--	--	--	--	--	--	--	--	--	--	--	--	PF10486//PF02724//PF04147//PF01080//PF00076//PF05764//PF03547//PF09726	Phosphoinositide 3-kinase gamma adapter protein p101 subunit//CDC45-like protein//Nop14-like family//Presenilin//RNA recognition motif. (a.k.a. RRM, RBD, or RNP domain)//YL1 nuclear protein//Membrane transport protein//Macoilin family	GO:0023041//GO:0006355//GO:0043486//GO:0016485//GO:0006270//GO:0006338//GO:0055085	neuronal signal transduction//regulation of transcription, DNA-templated//histone exchange//protein processing//DNA replication initiation//chromatin remodeling//transmembrane transport	GO:0046935//GO:0003676//GO:0004190	1-phosphatidylinositol-3-kinase regulator activity//nucleic acid binding//aspartic-type endopeptidase activity	GO:0032040//GO:0005944//GO:0016021//GO:0030867//GO:0005634	small-subunit processome//phosphatidylinositol 3-kinase complex, class IB//integral component of membrane//rough endoplasmic reticulum membrane//nucleus	--	--	UP	8.1641	9.93e-09	estscan,start:592 end:1749
Cluster-41647.10047	82	947	752	0	2	0	3.32	37.91	30.3	0	0.08	0	1099	676382973	XP_009034765.1	344	1e-29	hypothetical protein AURANDRAFT_6555, partial [Aureococcus anophagefferens]	XM_019899061.1	XM_019899061	37	3.42e-07	PREDICTED: Dendroctonus ponderosae putative endoglucanase type K (LOC109533682), mRNA	-	-	-	http://www.genome.jp/dbget-bin/www_bget?ko:-	P45699	574	8.4e-58	Putative endoglucanase type K OS=Fusarium oxysporum OX=5507 PE=2 SV=1	PF02015	Glycosyl hydrolase family 45	GO:0005985//GO:0005975//GO:0005982	sucrose metabolic process//carbohydrate metabolic process//starch metabolic process	GO:0008810	cellulase activity	--	--	--	--	UP	9.719	9.98e-09	blast,frame:3 start:54 end:761
Cluster-41647.4055	50	559	771	2	2	0	0.71	8.02	11.07	0.03	0.03	0	2640	1238991448	GAX79808.1	283	2.9e-22	hypothetical protein CEUSTIGMA_g7248.t1 [Chlamydomonas eustigma]	--	--	--	--	--	K13885	SCARB1	scavenger receptor class B, member 1	http://www.genome.jp/dbget-bin/www_bget?ko:K13885	Q14108	551	9.3e-55	Lysosome membrane protein 2 OS=Homo sapiens OX=9606 GN=SCARB2 PE=1 SV=2	PF08039//PF01130	Mitochondrial proteolipid//CD36 family	--	--	--	--	GO:0005739//GO:0016020	mitochondrion//membrane	KOG3776	Plasma membrane glycoprotein CD36 and related membrane receptors	UP	8.4131	9.99e-09	blast,frame:-3 start:1666 end:89
Cluster-41647.10606	65	639	865	0	1	0	4.64	44.03	60.38	0	0.07	0	738	1189382310	OSX69818.1	489	1.1e-46	hypothetical protein BU14_1114s0003 [Porphyra umbilicalis]	--	--	--	--	--	K02993	RP-S7e, RPS7	small subunit ribosomal protein S7e	http://www.genome.jp/dbget-bin/www_bget?ko:K02993	P48155	594	2.7e-60	40S ribosomal protein S7 OS=Manduca sexta OX=7130 GN=RpS7 PE=2 SV=1	PF02882//PF01251	Tetrahydrofolate dehydrogenase/cyclohydrolase, NAD(P)-binding domain//Ribosomal protein S7e	GO:0046487//GO:0042254//GO:0006412//GO:0009396	glyoxylate metabolic process//ribosome biogenesis//translation//folic acid-containing compound biosynthetic process	GO:0004488//GO:0003735	methylenetetrahydrofolate dehydrogenase (NADP+) activity//structural constituent of ribosome	GO:0005840	ribosome	KOG3320	40S ribosomal protein S7	UP	10.438	1e-08	blast,frame:3 start:111 end:701
Cluster-41647.33475	71	505	646	0	1	0	0.81	5.82	7.45	0	0.01	0	3226	695012830	XP_009393186.1	153	4.3e-07	PREDICTED: uncharacterized protein LOC103978942 [Musa acuminata subsp. malaccensis]	--	--	--	--	--	-	-	-	http://www.genome.jp/dbget-bin/www_bget?ko:-	--	--	--	--	PF02892	BED zinc finger	--	--	GO:0003677	DNA binding	--	--	--	--	UP	10.077	1e-08	blast,frame:1 start:577 end:3171
Cluster-37689.0	45	360	445	0	0	0	0.48	3.91	4.83	0	0	0	3415	1024057290	KZV54452.1	449	2.1e-41	hypothetical protein F511_09767 [Dorcoceras hygrometricum]	--	--	--	--	--	K11841	USP10, UBP3	ubiquitin carboxyl-terminal hydrolase 10	http://www.genome.jp/dbget-bin/www_bget?ko:K11841	Q14694	680	1.3e-69	Ubiquitin carboxyl-terminal hydrolase 10 OS=Homo sapiens OX=9606 GN=USP10 PE=1 SV=2	PF10147//PF09262//PF10541//PF05434//PF00443	Growth arrest and DNA-damage-inducible proteins-interacting protein 1//Peroxisome biogenesis factor 1, N-terminal//Nuclear envelope localisation domain//TMEM9//Ubiquitin carboxyl-terminal hydrolase	GO:0016579//GO:0007031	protein deubiquitination//peroxisome organization	GO:0036459//GO:0005524	thiol-dependent ubiquitinyl hydrolase activity//ATP binding	GO:0016021//GO:0005634//GO:0005777	integral component of membrane//nucleus//peroxisome	KOG1871	Ubiquitin-specific protease	UP	10.514	1e-08	blast,frame:3 start:390 end:2801
Cluster-41647.12947	44	394	452	0	0	0	0.35	3.17	3.64	0	0	0	4515	1271066105	PHT71252.1	222	5.9e-15	hypothetical protein T459_26356 [Capsicum annuum]	--	--	--	--	--	-	-	-	http://www.genome.jp/dbget-bin/www_bget?ko:-	Q6DRG7	391	5.7e-36	Protein phosphatase 1 regulatory subunit 12A OS=Danio rerio OX=7955 GN=ppp1r12a PE=2 SV=2	PF15898//PF13606//PF00023	cGMP-dependent protein kinase interacting domain//Ankyrin repeat//Ankyrin repeat	--	--	GO:0005515//GO:0019901	protein binding//protein kinase binding	--	--	KOG4177	Ankyrin	UP	10.58	1.01e-08	blast,frame:-2 start:2408 end:315
Cluster-41647.2175	69	53	62	305	196	226	1.38	1.07	1.25	5.98	3.99	4.57	1952	1557875186	RWR95711.1	1541	2.9e-168	Cytochrome P450 [Cinnamomum micranthum f. kanehirae]	AK414889.1	AK414889	48	4.73e-13	Cryptomeria japonica mRNA, clone: CSFL006_F03, expressed in reproductive shoots	K09587	CYP90B1, DWF4	steroid 22-alpha-hydroxylase	http://www.genome.jp/dbget-bin/www_bget?ko:K09587	O64989	1472	1.1e-161	Cytochrome P450 90B1 OS=Arabidopsis thaliana OX=3702 GN=CYP90B1 PE=1 SV=2	PF00067	Cytochrome P450	GO:0055114	oxidation-reduction process	GO:0016705//GO:0005506//GO:0020037	oxidoreductase activity, acting on paired donors, with incorporation or reduction of molecular oxygen//iron ion binding//heme binding	--	--	--	--	DOWN	-2.0481	1.01e-08	blast,frame:-2 start:1951 end:470
Cluster-41647.15810	551.98	212.55	1028.72	12	4	0	9.19	3.56	17.25	0.2	0.07	0	2296	116785065	ABK23577.1	339	8.2e-29	unknown [Picea sitchensis]	XM_030637137.1	XM_030637137	43	3.36e-10	PREDICTED: Cannabis sativa purple acid phosphatase 17-like (LOC115709102), mRNA	K14379	ACP5	tartrate-resistant acid phosphatase type 5	http://www.genome.jp/dbget-bin/www_bget?ko:K14379	Q8S341	251	5e-20	Purple acid phosphatase 7 OS=Arabidopsis thaliana OX=3702 GN=PAP7 PE=2 SV=1	PF13631	Cytochrome b(N-terminal)/b6/petB	GO:0006118	obsolete electron transport	GO:0009055//GO:0016491	electron transfer activity//oxidoreductase activity	GO:0016020	membrane	--	--	UP	6.869	1.01e-08	estscan,start:1896 end:1040; minus strand
Cluster-41647.13640	131	151.66	201	20	7	4	7.04	7.97	10.66	1.03	0.37	0.21	894	1344125251	PPD97803.1	550	1.1e-53	hypothetical protein GOBAR_DD05180 [Gossypium barbadense]	--	--	--	--	--	-	-	-	http://www.genome.jp/dbget-bin/www_bget?ko:-	Q9LHP4	487	8.3e-48	Receptor-like protein kinase 2 OS=Arabidopsis thaliana OX=3702 GN=RCH2 PE=1 SV=1	PF13855//PF00560//PF13516	Leucine rich repeat//Leucine Rich Repeat//Leucine Rich repeat	--	--	GO:0005515	protein binding	--	--	--	--	UP	3.9625	1.02e-08	estscan,start:1 end:894
Cluster-41647.9706	86	562	837	3	0	0	1.33	8.78	13.1	0.05	0	0	2443	326532784	BAJ89237.1	1868	4.4e-206	predicted protein [Hordeum vulgare subsp. vulgare]	XM_009079940.1	XM_009079940	58	1.64e-18	PREDICTED: Acanthisitta chloris endoplasmin (LOC103807219), partial mRNA	-	-	-	http://www.genome.jp/dbget-bin/www_bget?ko:-	P08110	1949	6.8e-217	Endoplasmin OS=Gallus gallus OX=9031 GN=HSP90B1 PE=1 SV=1	PF00183//PF00974	Hsp90 protein//Rhabdovirus spike glycoprotein	GO:0006457	protein folding	GO:0005524//GO:0051082	ATP binding//unfolded protein binding	GO:0019031	viral envelope	KOG0020	Endoplasmic reticulum glucose-regulated protein (GRP94/endoplasmin), HSP90 family	UP	8.9785	1.02e-08	blast,frame:2 start:128 end:2368
Cluster-41647.8139	58	467	595	2	3	0	5.29	40.59	52.6	0.17	0.27	0	634	922864928	KOO32083.1	212	1.2e-14	60s ribosomal protein l22 [Chrysochromulina tobinii]	--	--	--	--	--	K02891	RP-L22e, RPL22	large subunit ribosomal protein L22e	http://www.genome.jp/dbget-bin/www_bget?ko:K02891	P52865	263	5.6e-22	60S ribosomal protein L22 (Fragment) OS=Gadus morhua OX=8049 GN=rpl22 PE=2 SV=2	PF01776	Ribosomal L22e protein family	GO:0006412//GO:0042254	translation//ribosome biogenesis	GO:0003735	structural constituent of ribosome	GO:0005840	ribosome	KOG3434	60S ribosomal protein L22	UP	7.7792	1.02e-08	blast,frame:-1 start:478 end:47
Cluster-41647.26615	568.98	295	1448.89	20	38	19	11.22	5.84	28.73	0.39	0.76	0.38	1980	1091753041	XP_018685720.1	166	8.1e-09	PREDICTED: probable WRKY transcription factor 23 isoform X1 [Musa acuminata subsp. malaccensis]	AK411827.1	AK411827	114	9.82e-50	Cryptomeria japonica mRNA, clone: CLFL045_A22, expressed in needles	-	-	-	http://www.genome.jp/dbget-bin/www_bget?ko:-	Q93WV4	151	1.7e-08	WRKY transcription factor 71 OS=Arabidopsis thaliana OX=3702 GN=WRKY71 PE=2 SV=1	PF06512//PF03106//PF12937	Sodium ion transport-associated//WRKY DNA -binding domain//F-box-like	GO:0006355//GO:0006814	regulation of transcription, DNA-templated//sodium ion transport	GO:0043565//GO:0005248//GO:0003700//GO:0005515	sequence-specific DNA binding//voltage-gated sodium channel activity//DNA-binding transcription factor activity//protein binding	GO:0005667//GO:0001518	transcription regulator complex//voltage-gated sodium channel complex	--	--	UP	4.8406	1.03e-08	blast,frame:1 start:226 end:840|blast,frame:3 start:861 end:1124
Cluster-41647.3569	45	347	400	0	0	0	0.38	2.96	3.41	0	0	0	4279	1109216971	XP_019182951.1	695	8e-70	PREDICTED: cyclin-dependent kinase C-1-like [Ipomoea nil]	XM_018030452.2	XM_018030452	93	1.01e-37	PREDICTED: Ceratina calcarata cyclin-dependent kinase 9 (LOC108628491), mRNA	K08819	CDK12_13	cyclin-dependent kinase 12/13 [EC:2.7.11.22 2.7.11.23]	http://www.genome.jp/dbget-bin/www_bget?ko:K08819	Q5ZKN1	1076	2e-115	Cyclin-dependent kinase 9 OS=Gallus gallus OX=9031 GN=CDK9 PE=2 SV=1	PF01496//PF02601//PF13176//PF00715//PF13174//PF08702//PF00515//PF07714//PF00069//PF13181	V-type ATPase 116kDa subunit family//Exonuclease VII, large subunit//Tetratricopeptide repeat//Interleukin 2//Tetratricopeptide repeat//Fibrinogen alpha/beta chain family//Tetratricopeptide repeat//Protein tyrosine and serine/threonine kinase//Protein kinase domain//Tetratricopeptide repeat	GO:0006308//GO:0030168//GO:0007165//GO:0006468//GO:0006955//GO:0051258//GO:0008283//GO:0040007//GO:1902600	DNA catabolic process//platelet activation//signal transduction//protein phosphorylation//immune response//protein polymerization//cell population proliferation//growth//proton transmembrane transport	GO:0008083//GO:0005102//GO:0008855//GO:0015078//GO:0005524//GO:0005134//GO:0004672//GO:0005515	growth factor activity//signaling receptor binding//exodeoxyribonuclease VII activity//proton transmembrane transporter activity//ATP binding//interleukin-2 receptor binding//protein kinase activity//protein binding	GO:0005577//GO:0005576//GO:0033179//GO:0009318//GO:0005893	fibrinogen complex//extracellular region//proton-transporting V-type ATPase, V0 domain//exodeoxyribonuclease VII complex//interleukin-2 receptor complex	KOG0600	Cdc2-related protein kinase	UP	10.411	1.03e-08	blast,frame:-3 start:4277 end:3009
Cluster-41647.18794	57	502	924	3	2	0	0.94	8.35	15.4	0.05	0.03	0	2309	--	--	--	--	--	--	--	--	--	--	--	--	--	--	--	--	--	--	PF00335	Tetraspanin family	--	--	--	--	GO:0016021	integral component of membrane	--	--	UP	8.2174	1.05e-08	estscan,start:1821 end:1411; minus strand
Cluster-41647.30067	65	77	104	6	1	2	1.35	1.6	2.17	0.12	0.02	0.04	1895	1130832849	GAV84464.1	229	3.8e-16	DUF4219 domain-containing protein/UBN2 domain-containing protein [Cephalotus follicularis]	--	--	--	--	--	-	-	-	http://www.genome.jp/dbget-bin/www_bget?ko:-	--	--	--	--	--	--	--	--	--	--	--	--	--	--	UP	4.7367	1.06e-08	estscan,start:995 end:1; minus strand
Cluster-41647.10218	76	755	835.04	2	5	0	0.54	5.41	5.98	0.01	0.04	0	5046	--	--	--	--	--	--	--	--	--	--	--	--	--	--	Q5SSF7	475	1.2e-45	Terminal nucleotidyltransferase 5C OS=Mus musculus OX=10090 GN=Tent5c PE=1 SV=1	PF04999//PF07984	Cell division protein FtsL//Nucleotidyltransferase	GO:0051301	cell division	GO:1990817	RNA adenylyltransferase activity	GO:0016021	integral component of membrane	KOG3852	Uncharacterized conserved protein	UP	7.8569	1.07e-08	blast,frame:-2 start:4379 end:672
Cluster-41647.10181	64	531	585	1	1	0	0.61	5.08	5.6	0.01	0.01	0	3837	697994122	AIT70184.1	1029	1.3e-108	malate dehydrogenase [Symphyocladia latiuscula]	XM_029805521.1	XM_029805521	48	9.38e-13	PREDICTED: Formica exsecta TBC1 domain family member 9 (LOC115234448), transcript variant X2, mRNA	K00026	MDH2	malate dehydrogenase	http://www.genome.jp/dbget-bin/www_bget?ko:K00026	Q6ZT07	1861	1.7e-206	TBC1 domain family member 9 OS=Homo sapiens OX=9606 GN=TBC1D9 PE=2 SV=2	PF01073//PF02866//PF01118//PF00056//PF02882//PF01113	3-beta hydroxysteroid dehydrogenase/isomerase family//lactate/malate dehydrogenase, alpha/beta C-terminal domain//Semialdehyde dehydrogenase, NAD binding domain//lactate/malate dehydrogenase, NAD binding domain//Tetrahydrofolate dehydrogenase/cyclohydrolase, NAD(P)-binding domain//Dihydrodipicolinate reductase, N-terminus	GO:0009396//GO:0008209//GO:0055114//GO:0006694//GO:0008210//GO:0009089//GO:0046487//GO:0008207//GO:0009085	folic acid-containing compound biosynthetic process//androgen metabolic process//oxidation-reduction process//steroid biosynthetic process//estrogen metabolic process//lysine biosynthetic process via diaminopimelate//glyoxylate metabolic process//C21-steroid hormone metabolic process//lysine biosynthetic process	GO:0004488//GO:0016491//GO:0016616//GO:0003854//GO:0051287//GO:0008839//GO:0016620	methylenetetrahydrofolate dehydrogenase (NADP+) activity//oxidoreductase activity//oxidoreductase activity, acting on the CH-OH group of donors, NAD or NADP as acceptor//3-beta-hydroxy-delta5-steroid dehydrogenase activity//NAD binding//4-hydroxy-tetrahydrodipicolinate reductase//oxidoreductase activity, acting on the aldehyde or oxo group of donors, NAD or NADP as acceptor	--	--	KOG4347	GTPase-activating protein VRP	UP	9.1647	1.07e-08	blast,frame:1 start:139 end:1116
Cluster-41647.22972	136	78	528	0	0	0	4.39	2.5	17.03	0	0	0	1312	116784100	ABK23214.1	1116	3.7e-119	unknown [Picea sitchensis]	JQ443897.1	JQ443897	63	1.45e-21	Abies alba isolate AcesapA04 anonymous locus 0_16197_01 genomic sequence	-	-	-	http://www.genome.jp/dbget-bin/www_bget?ko:-	Q39635	981	6.4e-105	Uncharacterized 38.1 kDa protein OS=Capnoides sempervirens OX=3464 PE=2 SV=1	--	--	--	--	--	--	--	--	--	--	UP	10.333	1.08e-08	blast,frame:2 start:203 end:1219
Cluster-41647.28592	406	484	1666	47.23	23	30	6.84	8.2	28.27	0.78	0.39	0.51	2272	294460423	ADE75790.1	529	7.5e-51	unknown [Picea sitchensis]	--	--	--	--	--	K13448	CML	calcium-binding protein CML	http://www.genome.jp/dbget-bin/www_bget?ko:K13448	Q0JC44	251	4.9e-20	Probable calcium-binding protein CML22 OS=Oryza sativa subsp. japonica OX=39947 GN=CML22 PE=3 SV=1	PF00036//PF10591//PF13202//PF13405//PF13499	EF hand//Secreted protein acidic and rich in cysteine Ca binding region//EF hand//EF-hand domain//EF-hand domain pair	--	--	GO:0005509	calcium ion binding	--	--	--	--	UP	4.6358	1.08e-08	blast,frame:2 start:104 end:895
Cluster-41647.9691	109	849	1237	3	7	0	1.37	10.77	15.7	0.04	0.09	0	2956	1394870070	PWZ14666.1	1583	5.9e-173	Enolase 1, chloroplastic [Zea mays]	JQ789823.1	JQ789823	145	8.62e-67	Vanessa carye voucher Vane putative enolase protein mRNA, partial cds	K01689	ENO, eno	enolase	http://www.genome.jp/dbget-bin/www_bget?ko:K01689	P15007	1813	4.8e-201	Enolase OS=Drosophila melanogaster OX=7227 GN=Eno PE=1 SV=2	PF04091//PF02943//PF00095//PF09064	Exocyst complex subunit Sec15-like//Ferredoxin thioredoxin reductase catalytic beta chain//WAP-type (Whey Acidic Protein) 'four-disulfide core'//Thrombomodulin like fifth domain, EGF-like	GO:0006904//GO:0007165//GO:0055114	vesicle docking involved in exocytosis//signal transduction//oxidation-reduction process	GO:0016730//GO:0030414//GO:0004888	oxidoreductase activity, acting on iron-sulfur proteins as donors//peptidase inhibitor activity//transmembrane signaling receptor activity	GO:0016021//GO:0005576//GO:0000145	integral component of membrane//extracellular region//exocyst	KOG2670	Enolase	UP	7.7507	1.08e-08	blast,frame:1 start:31 end:1662
Cluster-36477.0	134	109	170	9	1	1	4.52	3.65	5.73	0.29	0.03	0.03	1266	116788422	ABK24874.1	258	1.1e-19	unknown [Picea sitchensis]	--	--	--	--	--	-	-	-	http://www.genome.jp/dbget-bin/www_bget?ko:-	--	--	--	--	--	--	--	--	--	--	--	--	--	--	UP	5.2407	1.09e-08	blast,frame:3 start:3 end:1106
Cluster-41647.2918	21.99	13.12	8	351.55	3455.08	381.57	0.2	0.12	0.07	3.19	32.53	3.57	3937	1129207299	OLQ09244.1	335	4.1e-28	CMP-sialic acid transporter 5 [Symbiodinium microadriaticum]	--	--	--	--	--	--	--	--	--	Q8B0U2	1448	1.4e-158	RNA-directed RNA polymerase L OS=Lettuce big-vein associated virus (isolate Japan/Kagawa) OX=652962 GN=L PE=3 SV=1	PF00946	Mononegavirales RNA dependent RNA polymerase	GO:0006144//GO:0006370//GO:0009451	purine nucleobase metabolic process//7-methylguanosine mRNA capping//RNA modification	GO:0004482//GO:0003968//GO:0005524	mRNA (guanine-N7-)-methyltransferase activity//RNA-directed 5'-3' RNA polymerase activity//ATP binding	GO:0031379	RNA-directed RNA polymerase complex	--	--	DOWN	-6.6946	1.09e-08	blast,frame:-3 start:2348 end:3
Cluster-41647.33689	47	265	347	0	0	0	1.3	7.32	9.63	0	0	0	1485	1021509788	XP_016198222.1	554	6.2e-54	phytanoyl-CoA dioxygenase [Arachis ipaensis]	--	--	--	--	--	-	-	-	http://www.genome.jp/dbget-bin/www_bget?ko:-	P0C660	558	8.1e-56	Phytanoyl-CoA dioxygenase domain-containing protein 1 homolog OS=Caenorhabditis briggsae OX=6238 GN=CBG00325 PE=3 SV=1	PF06667//PF07137	Phage shock protein B//VDE lipocalin domain	GO:0055114//GO:0006355//GO:0009271	oxidation-reduction process//regulation of transcription, DNA-templated//phage shock	GO:0046422	violaxanthin de-epoxidase activity	GO:0009507	chloroplast	KOG3290	Peroxisomal phytanoyl-CoA hydroxylase	UP	10.148	1.09e-08	blast,frame:-1 start:1179 end:292
Cluster-41647.6151	46	289	306	0	0	0	0.72	4.53	4.8	0	0	0	2438	1214703299	OWZ15338.1	696	3.5e-70	NAD-dependent Histone deacetylase sir2-like protein [Phytophthora megakarya]	XM_014428675.2	XM_014428675	51	1.27e-14	PREDICTED: Halyomorpha halys NAD-dependent protein deacetylase sirtuin-1 (LOC106685770), transcript variant X1, mRNA	K11411	SIRT1, SIR2L1	NAD-dependent deacetylase sirtuin 1	http://www.genome.jp/dbget-bin/www_bget?ko:K11411	Q96EB6	1084	1.4e-116	NAD-dependent protein deacetylase sirtuin-1 OS=Homo sapiens OX=9606 GN=SIRT1 PE=1 SV=2	PF06433//PF00205//PF02146	Methylamine dehydrogenase heavy chain (MADH)//Thiamine pyrophosphate enzyme, central domain//Sir2 family	GO:0015947//GO:0055114	methane metabolic process//oxidation-reduction process	GO:0030976//GO:0030058//GO:0070403//GO:0000287	thiamine pyrophosphate binding//amine dehydrogenase activity//NAD+ binding//magnesium ion binding	GO:0042597	periplasmic space	KOG2684	Sirtuin 5 and related class III sirtuins (SIR2 family)	UP	10.105	1.09e-08	blast,frame:2 start:314 end:2065
Cluster-41647.11606	46	294	380	0	0	0	0.47	3.06	3.95	0	0	0	3550	470109897	XP_004291224.1	2027	2.3e-224	PREDICTED: ABC transporter E family member 2 [Fragaria vesca subsp. vesca]	XM_020010898.1	XM_020010898	136	1.05e-61	PREDICTED: Aethina tumida ATP-binding cassette sub-family E member 1 (LOC109595524), mRNA	K06174	ABCE1, Rli1	ATP-binding cassette, sub-family E, member 1	http://www.genome.jp/dbget-bin/www_bget?ko:K06174	P61221	2055	5e-229	ATP-binding cassette sub-family E member 1 OS=Homo sapiens OX=9606 GN=ABCE1 PE=1 SV=1	PF13304//PF00575//PF01926//PF03193//PF00448//PF00005//PF02367//PF10150//PF00004//PF00910	AAA domain, putative AbiEii toxin, Type IV TA system//S1 RNA binding domain//50S ribosome-binding GTPase//RsgA GTPase//SRP54-type protein, GTPase domain//ABC transporter//Threonylcarbamoyl adenosine biosynthesis protein TsaE//Ribonuclease E/G family//ATPase family associated with various cellular activities (AAA)//RNA helicase	GO:0006614//GO:0002949	SRP-dependent cotranslational protein targeting to membrane//tRNA threonylcarbamoyladenosine modification	GO:0016887//GO:0003924//GO:0005524//GO:0003723//GO:0005525//GO:0003724//GO:0003676	ATPase activity//GTPase activity//ATP binding//RNA binding//GTP binding//RNA helicase activity//nucleic acid binding	--	--	KOG0063	RNAse L inhibitor, ABC superfamily	UP	10.275	1.09e-08	blast,frame:3 start:663 end:2537
Cluster-41647.3171	47	270	380.88	0	0	0	0.38	2.19	3.08	0	0	0	4495	1393701806	GBF94279.1	1003	1.6e-105	dual-specificity tyrosine-(Y)-phosphorylation regulated kinase [Raphidocelis subcapitata]	--	--	--	--	--	K18669	DYRK2_3_4	dual specificity tyrosine-phosphorylation-regulated kinase 2/3/4	http://www.genome.jp/dbget-bin/www_bget?ko:K18669	Q92630	1266	2e-137	Dual specificity tyrosine-phosphorylation-regulated kinase 2 OS=Homo sapiens OX=9606 GN=DYRK2 PE=1 SV=3	PF08091//PF07714//PF01297//PF00069	Spider insecticidal peptide//Protein tyrosine and serine/threonine kinase//Zinc-uptake complex component A periplasmic//Protein kinase domain	GO:0006468//GO:0009405//GO:0030001	protein phosphorylation//pathogenesis//metal ion transport	GO:0046872//GO:0005524//GO:0004672	metal ion binding//ATP binding//protein kinase activity	GO:0005576	extracellular region	KOG0667	Dual-specificity tyrosine-phosphorylation regulated kinase	UP	10.232	1.1e-08	blast,frame:1 start:2788 end:4200
Cluster-41647.14074	86	60	94	8	6	7	7.64	5.09	8.1	0.66	0.52	0.6	644	--	--	--	--	--	--	--	--	--	--	--	--	--	--	--	--	--	--	--	--	--	--	--	--	--	--	--	--	UP	3.4453	1.11e-08	--
Cluster-41647.3369	111	888	1154	8	4	0	2.89	23.08	30.1	0.2	0.11	0	1564	669165106	XP_008618115.1	274	1.9e-21	hypothetical protein SDRG_13795 [Saprolegnia diclina VS20]	--	--	--	--	--	K15040	VDAC2	voltage-dependent anion channel protein 2	http://www.genome.jp/dbget-bin/www_bget?ko:K15040	P81004	841	1.3e-88	Voltage-dependent anion-selective channel protein 2 OS=Xenopus laevis OX=8355 GN=vdac2 PE=1 SV=1	PF01459	Eukaryotic porin	GO:0055085	transmembrane transport	--	--	GO:0005741	mitochondrial outer membrane	KOG3126	Porin/voltage-dependent anion-selective channel protein	UP	7.521	1.11e-08	blast,frame:-1 start:1183 end:242
Cluster-41647.8899	44	358	357	0	0	0	1.42	11.5	11.52	0	0	0	1311	720021443	XP_010262728.1	782	2e-80	PREDICTED: proliferating cell nuclear antigen [Nelumbo nucifera]	--	--	--	--	--	K04802	PCNA	proliferating cell nuclear antigen	http://www.genome.jp/dbget-bin/www_bget?ko:K04802	P12004	799	8.1e-84	Proliferating cell nuclear antigen OS=Homo sapiens OX=9606 GN=PCNA PE=1 SV=1	PF00705//PF02144//PF02747//PF04139	Proliferating cell nuclear antigen, N-terminal domain//Repair protein Rad1/Rec1/Rad17//Proliferating cell nuclear antigen, C-terminal domain//Rad9	GO:0006275//GO:0000077	regulation of DNA replication//DNA damage checkpoint	GO:0003677	DNA binding	GO:0042025//GO:0030896	host cell nucleus//checkpoint clamp complex	KOG1636	DNA polymerase delta processivity factor (proliferating cell nuclear antigen)	UP	10.348	1.13e-08	blast,frame:2 start:8 end:1036
Cluster-41647.4187	43	408	381	0	0	0	0.48	4.64	4.33	0	0	0	3270	922866694	KOO33500.1	244	1.2e-17	zinc finger protein 726, partial [Chrysochromulina tobinii]	--	--	--	--	--	-	-	-	http://www.genome.jp/dbget-bin/www_bget?ko:-	Q99M85	686	2.6e-70	Transcriptional repressor scratch 1 OS=Mus musculus OX=10090 GN=Scrt1 PE=1 SV=1	PF02892//PF07975//PF01155//PF00096//PF01780	BED zinc finger//TFIIH C1-like domain//Hydrogenase/urease nickel incorporation, metallochaperone, hypA//Zinc finger, C2H2 type//Ribosomal L37ae protein family	GO:0006412//GO:0006281//GO:0051604//GO:0042254	translation//DNA repair//protein maturation//ribosome biogenesis	GO:0003677//GO:0008270//GO:0003735//GO:0003676//GO:0016151	DNA binding//zinc ion binding//structural constituent of ribosome//nucleic acid binding//nickel cation binding	GO:0005840	ribosome	KOG2462	C2H2-type Zn-finger protein	UP	10.48	1.13e-08	blast,frame:-3 start:2326 end:296
Cluster-41647.15363	209	194	743	8	10	1	4.81	4.47	17.18	0.18	0.23	0.02	1733	1173211848	BAX09109.1	1538	5.7e-168	TRICHOME BIREFRINGENCE-like protein [Cryptomeria japonica]	AK407380.1	AK407380	559	0	Cryptomeria japonica mRNA, clone: CFFL010_P10, expressed in female strobili	-	-	-	http://www.genome.jp/dbget-bin/www_bget?ko:-	Q940H3	822	2.3e-86	Protein trichome birefringence-like 36 OS=Arabidopsis thaliana OX=3702 GN=TBL36 PE=2 SV=1	--	--	--	--	--	--	--	--	--	--	UP	5.9077	1.13e-08	blast,frame:2 start:269 end:1465
Cluster-41647.4163	41	463	777	0	0	0	0.23	2.6	4.36	0	0	0	6374	1271140422	PHT96277.1	269	3e-20	hypothetical protein BC332_34797 [Capsicum chinense]	XM_030383891.1	XM_030383891	105	3.22e-44	PREDICTED: Drosophila navojoa ecdysone-induced protein 75B, isoforms C/D (LOC108651619), transcript variant X12, mRNA	--	--	--	--	O77245	695	4.5e-71	Nuclear hormone receptor E75 OS=Metapenaeus ensis OX=32278 GN=E75 PE=2 SV=1	PF02654//PF00105//PF11808	Cobalamin-5-phosphate synthase//Zinc finger, C4 type (two domains)//Phosphate regulon sensor protein PhoR	GO:0006355//GO:0009236//GO:0000160//GO:0016310//GO:0006470	regulation of transcription, DNA-templated//cobalamin biosynthetic process//phosphorelay signal transduction system//phosphorylation//protein dephosphorylation	GO:0008818//GO:0000155//GO:0043565//GO:0051073//GO:0008270//GO:0003700//GO:0004721	cobalamin 5'-phosphate synthase activity//phosphorelay sensor kinase activity//sequence-specific DNA binding//adenosylcobinamide-GDP ribazoletransferase activity//zinc ion binding//DNA-binding transcription factor activity//phosphoprotein phosphatase activity	GO:0009365//GO:0005667//GO:0042025	protein histidine kinase complex//transcription regulator complex//host cell nucleus	KOG4846	Nuclear receptor	UP	11.111	1.13e-08	blast,frame:3 start:567 end:6101
Cluster-41647.8875	91	718	941	3	6	0	2.47	19.49	25.64	0.08	0.16	0	1508	1426016536	GBG80382.1	312	7.3e-26	hypothetical protein CBR_g30750 [Chara braunii]	--	--	--	--	--	-	-	-	http://www.genome.jp/dbget-bin/www_bget?ko:-	Q0V882	428	9.8e-41	Bax inhibitor 1 OS=Bos taurus OX=9913 GN=TMBIM6 PE=2 SV=1	--	--	--	--	--	--	--	--	KOG1629	Bax-mediated apoptosis inhibitor TEGT/BI-1	UP	7.5775	1.14e-08	blast,frame:3 start:312 end:1043
Cluster-41647.31287	264.96	2391	2997	1	11	0	5.07	45.93	57.7	0.02	0.21	0	2032	698816274	XP_009841166.1	809	2.3e-83	hypothetical protein H257_14934 [Aphanomyces astaci]	XM_030681020.1	XM_030681020	353	0	PREDICTED: Rhodamnia argentea arginine kinase Lit v 2.0101-like (LOC115745458), mRNA	--	--	--	--	B1PVZ9	1502	3.8e-165	Arginine kinase Met e 2 OS=Metapenaeus ensis OX=32278 PE=1 SV=1	PF00217//PF02807	ATP:guanido phosphotransferase, C-terminal catalytic domain//ATP:guanido phosphotransferase, N-terminal domain	--	--	GO:0016772//GO:0016301	transferase activity, transferring phosphorus-containing groups//kinase activity	--	--	KOG3581	Creatine kinases	UP	8.8173	1.14e-08	blast,frame:-1 start:1576 end:119
Cluster-41647.35162	42	435	427	0	0	0	0.45	4.68	4.6	0	0	0	3438	922858715	KOO26814.1	375	8.2e-33	transmembrane protein 68 [Chrysochromulina tobinii]	--	--	--	--	--	-	-	-	http://www.genome.jp/dbget-bin/www_bget?ko:-	Q96MH6	705	1.7e-72	Transmembrane protein 68 OS=Homo sapiens OX=9606 GN=TMEM68 PE=2 SV=2	PF01553//PF03982//PF01285	Acyltransferase//Diacylglycerol acyltransferase//TEA/ATTS domain	GO:0006355	regulation of transcription, DNA-templated	GO:0016746//GO:0016747//GO:0003700	transferase activity, transferring acyl groups//transferase activity, transferring acyl groups other than amino-acyl groups//DNA-binding transcription factor activity	GO:0005667	transcription regulator complex	KOG3841	TEF-1 and related transcription factor, TEAD family	UP	10.6	1.14e-08	blast,frame:2 start:263 end:1810|blast,frame:-3 start:2719 end:1883
Cluster-41647.8020	38	574.01	663	0	0	0	0.37	5.62	6.49	0	0	0	3761	--	--	--	--	--	--	--	--	--	--	--	--	--	--	--	--	--	--	PF01501//PF06917//PF00907//PF08181	Glycosyl transferase family 8//Periplasmic pectate lyase//T-box//DegQ (SacQ) family	GO:0006355//GO:1900192//GO:0045490	regulation of transcription, DNA-templated//positive regulation of single-species biofilm formation//pectin catabolic process	GO:0003700//GO:0016757//GO:0016837	DNA-binding transcription factor activity//transferase activity, transferring glycosyl groups//carbon-oxygen lyase activity, acting on polysaccharides	GO:0005634//GO:0042597//GO:0005667	nucleus//periplasmic space//transcription regulator complex	--	--	UP	11.099	1.15e-08	estscan,start:1022 end:3683
Cluster-41647.5155	71	581	796	1	4	0	1.24	10.21	14.01	0.02	0.07	0	2199	694451704	XP_009350962.1	798	4.7e-82	PREDICTED: GTP-binding nuclear protein Ran [Pyrus x bretschneideri]	XM_012313262.2	XM_012313262	181	6.21e-87	PREDICTED: Bombus terrestris GTP-binding nuclear protein Ran (LOC100646748), mRNA	K07936	RAN	GTP-binding nuclear protein Ran	http://www.genome.jp/dbget-bin/www_bget?ko:K07936	P52301	813	3.2e-85	GTP-binding nuclear protein Ran OS=Xenopus laevis OX=8355 GN=ran PE=1 SV=2	PF00071//PF00910//PF04670//PF00503//PF01926//PF04882//PF14980//PF00009//PF03193//PF00025	Ras family//RNA helicase//Gtr1/RagA G protein conserved region//G-protein alpha subunit//50S ribosome-binding GTPase//Peroxin-3//TIP39 peptide//Elongation factor Tu GTP binding domain//RsgA GTPase//ADP-ribosylation factor family	GO:0007218//GO:0007186//GO:0007031	neuropeptide signaling pathway//G protein-coupled receptor signaling pathway//peroxisome organization	GO:0003723//GO:0003724//GO:0031683//GO:0005525//GO:0019001//GO:0003924	RNA binding//RNA helicase activity//G-protein beta/gamma-subunit complex binding//GTP binding//guanyl nucleotide binding//GTPase activity	GO:0005779//GO:0005576	integral component of peroxisomal membrane//extracellular region	KOG0096	GTPase Ran/TC4/GSP1 (nuclear protein transport pathway), small G protein superfamily	UP	8.1282	1.15e-08	blast,frame:-1 start:2058 end:1366
Cluster-41647.34041	41	458	486	0	0	0	1.06	11.82	12.58	0	0	0	1574	848896149	XP_012848129.1	538	4.7e-52	PREDICTED: thiol protease aleurain-like [Erythranthe guttata]	--	--	--	--	--	K01366	CTSH	cathepsin H	http://www.genome.jp/dbget-bin/www_bget?ko:K01366	P25326	619	7.3e-63	Cathepsin S OS=Bos taurus OX=9913 GN=CTSS PE=1 SV=2	PF03051//PF05300//PF00112	Peptidase C1-like family//Protein of unknown function (DUF737)//Papain family cysteine protease	GO:0006508	proteolysis	GO:0008234//GO:0004197	cysteine-type peptidase activity//cysteine-type endopeptidase activity	GO:0005739//GO:0061617	mitochondrion//MICOS complex	KOG1543	Cysteine proteinase Cathepsin L	UP	10.725	1.15e-08	blast,frame:2 start:164 end:1456
Cluster-39731.0	50	505	528	2	2	0	0.4	4.1	4.29	0.02	0.02	0	4479	971517545	GAQ80671.1	1047	1.3e-110	TOUSLED-like kinase [Klebsormidium nitens]	XM_022840728.1	XM_022840728	154	1.3e-71	PREDICTED: Varroa jacobsoni serine/threonine-protein kinase tousled-like 2 (LOC111264667), transcript variant X1, mRNA	K08864	TLK	tousled-like kinase	http://www.genome.jp/dbget-bin/www_bget?ko:K08864	Q9UKI8	1363	1.1e-148	Serine/threonine-protein kinase tousled-like 1 OS=Homo sapiens OX=9606 GN=TLK1 PE=1 SV=2	PF07473//PF07714//PF00069//PF00321	Spasmodic peptide gm9a; conotoxin from Conus species//Protein tyrosine and serine/threonine kinase//Protein kinase domain//Plant thionin	GO:0006952//GO:0006468//GO:0009405	defense response//protein phosphorylation//pathogenesis	GO:0004672//GO:0005524	protein kinase activity//ATP binding	GO:0005576	extracellular region	KOG1151	Tousled-like protein kinase	UP	8.0568	1.18e-08	blast,frame:2 start:1802 end:4051
Cluster-41647.26499	959.63	626	1559	22	36	2	59.24	37.59	94.64	1.29	2.19	0.12	812	--	--	--	--	--	--	--	--	--	--	--	--	--	--	--	--	--	--	--	--	--	--	--	--	--	--	--	--	UP	5.7035	1.2e-08	--
Cluster-41647.28791	269	2652.81	3845	3	14	0	3.49	34.71	50.35	0.04	0.19	0	2872	326497203	BAK02186.1	3215	0	predicted protein [Hordeum vulgare subsp. vulgare]	MH990529.1	MH990529	641	0	Tetranychus truncatus clone 94 elongation factor 2-like mRNA, complete cds	K03234	EEF2	elongation factor 2	http://www.genome.jp/dbget-bin/www_bget?ko:K03234	Q1HPK6	3361	0	Translation elongation factor 2 OS=Bombyx mori OX=7091 GN=tef2 PE=1 SV=1	PF01926//PF00009//PF03144//PF05355//PF03764	50S ribosome-binding GTPase//Elongation factor Tu GTP binding domain//Elongation factor Tu domain 2//Apolipoprotein C-II//Elongation factor G, domain IV	GO:0006629//GO:0006869	lipid metabolic process//lipid transport	GO:0005525//GO:0003924//GO:0008047	GTP binding//GTPase activity//enzyme activator activity	GO:0042627	chylomicron	KOG0469	Elongation factor 2	UP	8.5942	1.2e-08	blast,frame:2 start:176 end:2764
Cluster-41647.32855	46	254	302	0	0	0	1.31	7.22	8.62	0	0	0	1450	--	--	--	--	--	--	--	--	--	--	--	--	--	--	--	--	--	--	--	--	--	--	--	--	--	--	--	--	UP	10.016	1.2e-08	estscan,start:1450 end:667; minus strand
Cluster-41647.10270	52	410	518	2	2	0	0.31	2.49	3.14	0.01	0.01	0	5912	1344029265	XP_023897712.1	1289	1.5e-138	aspartate aminotransferase, mitochondrial-like [Quercus suber]	XM_025787881.2	XM_025787881	42	3.14e-09	PREDICTED: Arachis hypogaea aspartate aminotransferase, mitochondrial (LOC112737780), mRNA	K12879	THOC2	THO complex subunit 2	http://www.genome.jp/dbget-bin/www_bget?ko:K12879	C1FXW9	2257	3.2e-252	THO complex subunit 2 OS=Dasypus novemcinctus OX=9361 GN=THOC2 PE=3 SV=1	PF06237//PF00155//PF09803	Protein of unknown function (DUF1011)//Aminotransferase class I and II//Pet100	GO:0033617//GO:0032218//GO:0009058	mitochondrial cytochrome c oxidase assembly//riboflavin transport//biosynthetic process	GO:0032217//GO:0030170	riboflavin transmembrane transporter activity//pyridoxal phosphate binding	GO:0005887//GO:0005739	integral component of plasma membrane//mitochondrion	KOG1411	Aspartate aminotransferase/Glutamic oxaloacetic transaminase AAT1/GOT2	UP	7.9141	1.21e-08	blast,frame:-2 start:5617 end:4319
Cluster-41647.32255	41	453	425.89	0	0	0	0.34	3.85	3.61	0	0	0	4298	--	--	--	--	--	--	--	--	--	--	--	--	--	--	Q8NDA2	179	2.1e-11	Hemicentin-2 OS=Homo sapiens OX=9606 GN=HMCN2 PE=2 SV=3	PF00041	Fibronectin type III domain	--	--	GO:0005515	protein binding	--	--	--	--	UP	10.625	1.23e-08	blast,frame:3 start:3 end:4298
Cluster-41647.31995	109	1302	1966.77	0	4	0	5.25	61.56	93.76	0	0.19	0	967	--	--	--	--	--	--	--	--	--	--	--	--	--	--	--	--	--	--	PF07817//PF04513//PF07464//PF05478	GLE1-like protein//Baculovirus polyhedron envelope protein, PEP, C terminus//Apolipophorin-III precursor (apoLp-III)//Prominin	GO:0006869//GO:0016973	lipid transport//poly(A)+ mRNA export from nucleus	GO:0008289//GO:0005198	lipid binding//structural molecule activity	GO:0019028//GO:0005643//GO:0005576//GO:0016021//GO:0019031	viral capsid//nuclear pore//extracellular region//integral component of membrane//viral envelope	--	--	UP	9.6483	1.23e-08	estscan,start:1 end:656
Cluster-41647.9784	42	379	464	0	0	0	0.52	4.69	5.75	0	0	0	3022	452823611	EME30620.1	1390	1.5e-150	asparaginyl-tRNA synthetase isoform 2 [Galdieria sulphuraria]	XM_010128533.1	XM_010128533	87	1.54e-34	PREDICTED: Chlamydotis macqueenii asparaginyl-tRNA synthetase (NARS), partial mRNA	K01893	NARS, asnS	asparaginyl-tRNA synthetase	http://www.genome.jp/dbget-bin/www_bget?ko:K01893	Q2KJG3	1682	7.6e-186	Asparagine--tRNA ligase, cytoplasmic OS=Bos taurus OX=9913 GN=NARS PE=2 SV=3	PF00152//PF07544//PF01336//PF01409//PF16716//PF07160	tRNA synthetases class II (D, K and N)//RNA polymerase II transcription mediator complex subunit 9//OB-fold nucleic acid binding domain//tRNA synthetases class II core domain (F)//Bone marrow stromal antigen 2//Spindle and kinetochore-associated protein 1	GO:0006357//GO:0006418//GO:0043039//GO:0051607//GO:0007059//GO:0051301	regulation of transcription by RNA polymerase II//tRNA aminoacylation for protein translation//tRNA aminoacylation//defense response to virus//chromosome segregation//cell division	GO:0008017//GO:0004812//GO:0005524//GO:0003676//GO:0000166//GO:0000049//GO:0003712	microtubule binding//aminoacyl-tRNA ligase activity//ATP binding//nucleic acid binding//nucleotide binding//tRNA binding//transcription coregulator activity	GO:0005667//GO:0045298//GO:0016592	transcription regulator complex//tubulin complex//mediator complex	KOG0555	Asparaginyl-tRNA synthetase	UP	10.573	1.23e-08	blast,frame:-1 start:2932 end:1493
Cluster-41647.34709	85	412	692	5	4	0	0.4	1.95	3.28	0.02	0.02	0	7504	1070959254	OEL28134.1	335	7.8e-28	putative ADP-ribosylation factor GTPase-activating protein AGD9 [Dichanthelium oligosanthes]	--	--	--	--	--	K12493	ARFGAP2_3	ADP-ribosylation factor GTPase-activating protein 2/3	http://www.genome.jp/dbget-bin/www_bget?ko:K12493	Q09531	400	8.6e-37	Uncharacterized protein F07F6.4 OS=Caenorhabditis elegans OX=6239 GN=F07F6.4 PE=4 SV=2	PF01080//PF00949//PF02322//PF01412	Presenilin//Peptidase S7, Flavivirus NS3 serine protease//Cytochrome bd terminal oxidase subunit II//Putative GTPase activating protein for Arf	GO:0016485//GO:0055114	protein processing//oxidation-reduction process	GO:0005096//GO:0004190//GO:0005524//GO:0003724//GO:0003723	GTPase activator activity//aspartic-type endopeptidase activity//ATP binding//RNA helicase activity//RNA binding	GO:0016021//GO:0016020	integral component of membrane//membrane	KOG0706	Predicted GTPase-activating protein	UP	7.0531	1.23e-08	blast,frame:3 start:93 end:2027
Cluster-41647.4464	67	510	681.02	3	4	0	0.29	2.23	2.97	0.01	0.02	0	8126	731362717	XP_010693034.1	202	2.2e-12	PREDICTED: ARF guanine-nucleotide exchange factor GNOM [Beta vulgaris subsp. vulgaris]	--	--	--	--	--	K18442	ARFGEF, BIG	brefeldin A-inhibited guanine nucleotide-exchange protein	http://www.genome.jp/dbget-bin/www_bget?ko:K18442	E1JIT7	694	7.5e-71	PH and SEC7 domain-containing protein OS=Drosophila melanogaster OX=7227 GN=Efa6 PE=1 SV=2	PF01369//PF05827//PF07655	Sec7 domain//Vacuolar ATP synthase subunit S1 (ATP6S1)//Secretin N-terminal domain	GO:0006119//GO:0009297//GO:0032012//GO:0015986//GO:0043087//GO:1902600	oxidative phosphorylation//pilus assembly//regulation of ARF protein signal transduction//ATP synthesis coupled proton transport//regulation of GTPase activity//proton transmembrane transport	GO:0046961//GO:0046933//GO:0005086	proton-transporting ATPase activity, rotational mechanism//proton-transporting ATP synthase activity, rotational mechanism//ARF guanyl-nucleotide exchange factor activity	GO:0033180//GO:0045259//GO:0019867	proton-transporting V-type ATPase, V1 domain//proton-transporting ATP synthase complex//outer membrane	KOG0932	Guanine nucleotide exchange factor EFA6	UP	7.4724	1.23e-08	blast,frame:-3 start:6009 end:1117
Cluster-41647.10308	61	752	643	0	1	0	3.29	39.63	34.21	0	0.05	0	892	--	--	--	--	--	--	--	--	--	--	--	--	--	--	--	--	--	--	--	--	--	--	--	--	--	--	--	--	UP	10.324	1.23e-08	estscan,start:540 end:124; minus strand
Cluster-41647.29957	576	228	1494	21	5	2	42.06	16.06	106.66	1.45	0.36	0.14	727	1273181556	PIA63264.1	490	8e-47	hypothetical protein AQUCO_00200944v1 [Aquilegia coerulea]	--	--	--	--	--	-	-	-	http://www.genome.jp/dbget-bin/www_bget?ko:-	Q84TH6	388	2e-36	Dirigent protein 23 OS=Arabidopsis thaliana OX=3702 GN=DIR23 PE=2 SV=1	--	--	--	--	--	--	--	--	--	--	UP	6.4186	1.24e-08	blast,frame:1 start:1 end:555
Cluster-41647.28173	174.76	162.71	270.51	35	15	19	3.26	3.04	5.07	0.64	0.28	0.36	2080	508720229	EOY12126.1	842	3.5e-87	Receptor like protein 53, putative [Theobroma cacao]	--	--	--	--	--	-	-	-	http://www.genome.jp/dbget-bin/www_bget?ko:-	Q6JN46	790	1.4e-82	Receptor-like protein EIX2 OS=Solanum lycopersicum OX=4081 GN=EIX2 PE=1 SV=2	PF13516//PF13855//PF00560	Leucine Rich repeat//Leucine rich repeat//Leucine Rich Repeat	--	--	GO:0005515	protein binding	--	--	--	--	UP	3.1009	1.26e-08	blast,frame:-2 start:2079 end:1
Cluster-41647.17172	400	1221	1088.07	89	33	52	6.28	19.29	17.22	1.37	0.53	0.83	2419	1137193005	OMO65808.1	1356	1e-146	Lipase, class 3 [Corchorus olitorius]	XM_008446523.2	XM_008446523	55	7.56e-17	PREDICTED: Cucumis melo phospholipase A1-Igamma1, chloroplastic (LOC103487991), mRNA	-	-	-	http://www.genome.jp/dbget-bin/www_bget?ko:-	Q941F1	1068	9.6e-115	Phospholipase A1-Igamma1, chloroplastic OS=Arabidopsis thaliana OX=3702 GN=At1g06800 PE=1 SV=2	PF07819//PF01764	PGAP1-like protein//Lipase (class 3)	GO:0006629	lipid metabolic process	GO:0016788	hydrolase activity, acting on ester bonds	--	--	--	--	UP	3.9138	1.26e-08	blast,frame:1 start:145 end:1836
Cluster-41647.29534	259.61	608.38	430.64	46	13	11	11.44	26.41	18.83	1.95	0.57	0.48	1032	--	--	--	--	--	--	--	--	--	--	--	--	--	--	--	--	--	--	--	--	--	--	--	--	--	--	--	--	UP	4.2189	1.27e-08	estscan,start:209 end:403
Cluster-41647.9520	105	936	1587	1	6	0	1.92	17.19	29.2	0.02	0.11	0	2115	970639007	KUF82284.1	912	2.7e-95	disulfide-isomerase protein [Phytophthora nicotianae]	XM_015732007.2	XM_015732007	71	8.41e-26	PREDICTED: Cephus cinctus protein disulfide-isomerase (LOC107264104), mRNA	K09580	PDIA1, P4HB	protein disulfide-isomerase A1	http://www.genome.jp/dbget-bin/www_bget?ko:K09580	Q17770	1264	1.6e-137	Protein disulfide-isomerase 2 OS=Caenorhabditis elegans OX=6239 GN=pdi-2 PE=1 SV=1	PF00085//PF08534//PF00578//PF00462//PF07912	Thioredoxin//Redoxin//AhpC/TSA family//Glutaredoxin//ERp29, N-terminal domain	GO:0009306//GO:0055114//GO:0006118//GO:0045454	protein secretion//oxidation-reduction process//obsolete electron transport//cell redox homeostasis	GO:0009055//GO:0016209//GO:0015035//GO:0016491	electron transfer activity//antioxidant activity//protein disulfide oxidoreductase activity//oxidoreductase activity	GO:0005788	endoplasmic reticulum lumen	KOG0190	Protein disulfide isomerase (prolyl 4-hydroxylase beta subunit)	UP	8.5013	1.27e-08	blast,frame:3 start:375 end:1964
Cluster-41647.9742	53	449	461	2	1	0	1.78	15.01	15.49	0.07	0.03	0	1269	326498465	BAJ98660.1	504	3.3e-48	predicted protein [Hordeum vulgare subsp. vulgare]	--	--	--	--	--	K00522	FTH1	ferritin heavy chain	http://www.genome.jp/dbget-bin/www_bget?ko:K00522	P42577	509	3.3e-50	Soma ferritin OS=Lymnaea stagnalis OX=6523 PE=2 SV=2	PF00210//PF02915	Ferritin-like domain//Rubrerythrin	GO:0055114//GO:0006879	oxidation-reduction process//cellular iron ion homeostasis	GO:0008199//GO:0016491//GO:0046872	ferric iron binding//oxidoreductase activity//metal ion binding	--	--	KOG2332	Ferritin	UP	8.3085	1.28e-08	blast,frame:-2 start:677 end:135
Cluster-41647.3953	42	387	370.03	0	0	0	0.58	5.4	5.17	0	0	0	2709	1045363638	GAU47504.1	1105	1.5e-117	hypothetical protein TSUD_367650 [Trifolium subterraneum]	XM_013294175.1	XM_013294175	67	1.81e-23	PREDICTED: Papilio polytes ribonucleoside-diphosphate reductase subunit M2 (LOC106111961), mRNA	K10808	RRM2	ribonucleoside-diphosphate reductase subunit M2	http://www.genome.jp/dbget-bin/www_bget?ko:K10808	P31350	1171	1.2e-126	Ribonucleoside-diphosphate reductase subunit M2 OS=Homo sapiens OX=9606 GN=RRM2 PE=1 SV=1	PF08417//PF07714//PF00268//PF00069	Pheophorbide a oxygenase//Protein tyrosine and serine/threonine kinase//Ribonucleotide reductase, small chain//Protein kinase domain	GO:0006468//GO:0009263//GO:0055114	protein phosphorylation//deoxyribonucleotide biosynthetic process//oxidation-reduction process	GO:0005524//GO:0004672//GO:0010277	ATP binding//protein kinase activity//chlorophyllide a oxygenase [overall] activity	--	--	KOG1567	Ribonucleotide reductase, beta subunit	UP	10.421	1.28e-08	blast,frame:3 start:51 end:1097
Cluster-41647.5324	120	158	514	0	1	0	1.55	2.05	6.68	0	0.01	0	2890	1426035020	GBG62301.1	350	5.5e-30	hypothetical protein CBR_g29911 [Chara braunii]	--	--	--	--	--	K19951	TBC1D8_9	TBC1 domain family member 8/9	http://www.genome.jp/dbget-bin/www_bget?ko:K19951	Q3U0J8	536	5.6e-53	TBC1 domain family member 2B OS=Mus musculus OX=10090 GN=Tbc1d2b PE=1 SV=2	PF08041//PF00283	PetM family of cytochrome b6f complex subunit 7//Cytochrome b559, alpha (gene psbE) and beta (gene psbF)subunits	GO:0015979	photosynthesis	--	--	GO:0009512	cytochrome b6f complex	KOG2058	Ypt/Rab GTPase activating protein	UP	9.4608	1.3e-08	blast,frame:-3 start:2888 end:2169
Cluster-41647.20682	864.87	531.54	2152.26	59	33	9	138.19	77.44	322.93	8.42	4.91	1.34	473	293329689	BAJ04354.1	209	2e-14	pollen allergen CPA63 [Cryptomeria japonica]	--	--	--	--	--	-	-	-	http://www.genome.jp/dbget-bin/www_bget?ko:-	Q6F4N5	154	1.8e-09	Aspartyl protease 25 OS=Oryza sativa subsp. japonica OX=39947 GN=AP25 PE=2 SV=1	--	--	--	--	--	--	--	--	--	--	UP	5.1648	1.31e-08	--
Cluster-41647.26596	786.11	853	952.04	376.69	307	249	6.74	7.4	8.26	3.19	2.69	2.17	4211	116789039	ABK25095.1	300	5e-24	unknown [Picea sitchensis]	--	--	--	--	--	-	-	-	http://www.genome.jp/dbget-bin/www_bget?ko:-	Q9SUF1	243	7.7e-19	WAT1-related protein At4g08290 OS=Arabidopsis thaliana OX=3702 GN=At4g08290 PE=2 SV=1	PF00892	EamA-like transporter family	--	--	--	--	GO:0016021//GO:0016020	integral component of membrane//membrane	--	--	UP	1.4143	1.31e-08	blast,frame:-1 start:695 end:216
Cluster-41647.23651	270.13	180.28	684.13	19	6	14	51.5	30.76	120.89	3.18	1.05	2.46	438	293329689	BAJ04354.1	235	1.8e-17	pollen allergen CPA63 [Cryptomeria japonica]	XM_020409028.1	XM_020409028	35	1.68e-06	PREDICTED: Asparagus officinalis aspartic proteinase nepenthesin-1-like (LOC109840397), mRNA	-	-	-	http://www.genome.jp/dbget-bin/www_bget?ko:-	Q6F4N5	176	4.7e-12	Aspartyl protease 25 OS=Oryza sativa subsp. japonica OX=39947 GN=AP25 PE=2 SV=1	--	--	--	--	--	--	--	--	--	--	UP	4.8116	1.34e-08	--
Cluster-41647.4900	66	545.55	786.22	3	4	0	0.35	2.91	4.18	0.02	0.02	0	6708	1026764610	OAE25414.1	187	1e-10	hypothetical protein AXG93_4620s2290 [Marchantia polymorpha subsp. ruderalis]	--	--	--	--	--	K18266	NDRG1	protein NDRG1	http://www.genome.jp/dbget-bin/www_bget?ko:K18266	O02485	460	8.5e-44	Uncharacterized protein ZK1073.1 OS=Caenorhabditis elegans OX=6239 GN=ZK1073.1 PE=3 SV=1	--	--	--	--	--	--	--	--	KOG2931	Differentiation-related gene 1 protein (NDR1 protein), related proteins	UP	7.6269	1.34e-08	blast,frame:-3 start:5245 end:3929
Cluster-41647.4954	44	282	329	0	0	0	0.97	6.2	7.25	0	0	0	1806	1359823499	PRW58735.1	192	7.1e-12	WW domain-binding 4 [Chlorella sorokiniana]	--	--	--	--	--	K13220	WBP4, FBP21	WW domain-binding protein 4	http://www.genome.jp/dbget-bin/www_bget?ko:K13220	Q5HZF2	243	3.3e-19	WW domain-binding protein 4 OS=Rattus norvegicus OX=10116 GN=Wbp4 PE=2 SV=1	PF04871//PF07850//PF00032//PF06220//PF13965//PF04999//PF02183//PF06156//PF06005//PF07535	Uso1 / p115 like vesicle tethering protein, C terminal region//Renin receptor-like protein//Cytochrome b(C-terminal)/b6/petD//U1 zinc finger//dsRNA-gated channel SID-1//Cell division protein FtsL//Homeobox associated leucine zipper//Initiation control protein YabA//Cell division protein ZapB//DBF zinc finger	GO:0043093//GO:0051301//GO:0006886//GO:0006355//GO:0006118//GO:0090529//GO:0006260//GO:0016192//GO:0033227//GO:0015931	FtsZ-dependent cytokinesis//cell division//intracellular protein transport//regulation of transcription, DNA-templated//obsolete electron transport//cell septum assembly//DNA replication//vesicle-mediated transport//dsRNA transport//nucleobase-containing compound transport	GO:0008270//GO:0051033//GO:0016491//GO:0003676//GO:0038023//GO:0009055//GO:0043565	zinc ion binding//RNA transmembrane transporter activity//oxidoreductase activity//nucleic acid binding//signaling receptor activity//electron transfer activity//sequence-specific DNA binding	GO:0005737//GO:0016021//GO:0016020	cytoplasm//integral component of membrane//membrane	KOG0150	Spliceosomal protein FBP21	UP	10.138	1.34e-08	blast,frame:3 start:87 end:443
Cluster-41647.13549	159	1344	2559	6	0	0	0.98	8.44	16.06	0.04	0	0	5725	1111068875	XP_019240596.1	1215	5.4e-130	PREDICTED: LOW QUALITY PROTEIN: eukaryotic translation initiation factor 3 subunit B-like [Nicotiana attenuata]	--	--	--	--	--	K03253	EIF3B	translation initiation factor 3 subunit B	http://www.genome.jp/dbget-bin/www_bget?ko:K03253	P55884	1742	1.6e-192	Eukaryotic translation initiation factor 3 subunit B OS=Homo sapiens OX=9606 GN=EIF3B PE=1 SV=3	PF00237//PF01545//PF00076//PF00400//PF04053	Ribosomal protein L22p/L17e//Cation efflux family//RNA recognition motif. (a.k.a. RRM, RBD, or RNP domain)//WD domain, G-beta repeat//Coatomer WD associated region	GO:0016192//GO:0006412//GO:0006886//GO:0055085//GO:0042254//GO:0006812	vesicle-mediated transport//translation//intracellular protein transport//transmembrane transport//ribosome biogenesis//cation transport	GO:0008324//GO:0005515//GO:0003735//GO:0003676//GO:0005198	cation transmembrane transporter activity//protein binding//structural constituent of ribosome//nucleic acid binding//structural molecule activity	GO:0016021//GO:0005840//GO:0030117	integral component of membrane//ribosome//membrane coat	KOG2314	Translation initiation factor 3, subunit b (eIF-3b)	UP	9.4883	1.34e-08	blast,frame:-1 start:2176 end:83
Cluster-29796.0	43	315	343	0	0	0	0.84	6.21	6.78	0	0	0	1986	1191655190	OTG07161.1	405	1.6e-36	putative apoptosis inhibitory protein 5 (API5) [Helianthus annuus]	--	--	--	--	--	-	-	-	http://www.genome.jp/dbget-bin/www_bget?ko:-	Q5R644	763	1.8e-79	Apoptosis inhibitor 5 OS=Pongo abelii OX=9601 GN=API5 PE=2 SV=1	PF02985	HEAT repeat	--	--	GO:0005515	protein binding	--	--	KOG2213	Apoptosis inhibitor 5/fibroblast growth factor 2-interacting factor 2, and related proteins	UP	10.234	1.35e-08	blast,frame:-1 start:1974 end:340
Cluster-41647.18004	5255	5494	3999	635	291	110	51.5	54.45	39.64	6.14	2.92	1.1	3715	1204904095	XP_021284316.1	1863	2.5e-205	nitrate reductase [NADH]-like [Herrania umbratica]	XM_023695517.1	XM_023695517	138	8.46e-63	PREDICTED: Cucurbita pepo subsp. pepo nitrate reductase [NADH] (LOC111809152), mRNA	-	-	-	http://www.genome.jp/dbget-bin/www_bget?ko:-	P39870	1818	1.6e-201	Inducible nitrate reductase [NADH] 2 OS=Glycine max OX=3847 GN=INR2 PE=2 SV=1	PF03404//PF00175//PF08030	Mo-co oxidoreductase dimerisation domain//Oxidoreductase NAD-binding domain//Ferric reductase NAD binding domain	GO:0055114	oxidation-reduction process	GO:0030151//GO:0016491	molybdenum ion binding//oxidoreductase activity	--	--	KOG0534	NADH-cytochrome b-5 reductase	UP	3.8511	1.35e-08	blast,frame:-2 start:3096 end:1933|blast,frame:-1 start:1870 end:221
Cluster-41647.8496	87	891	1214	2	6	0	0.35	3.67	5	0.01	0.02	0	8595	1191682699	OTG34661.1	377	1.2e-32	putative protein Networked (NET), actin-binding (NAB) domain-containing protein [Helianthus annuus]	LM523255.1	LM523255	66	2.08e-22	Parastrongyloides trichosuri genome assembly P_trichosuri_KNP ,scaffold PTRK_scaffold0000081	-	-	-	http://www.genome.jp/dbget-bin/www_bget?ko:-	P13395	7427	0	Spectrin alpha chain OS=Drosophila melanogaster OX=7227 GN=alpha-Spec PE=1 SV=2	PF07653//PF14604//PF00435//PF00036//PF13405//PF17204//PF13202//PF00018//PF02891//PF13499	Variant SH3 domain//Variant SH3 domain//Spectrin repeat//EF hand//EF-hand domain//Sid-5 family//EF hand//SH3 domain//MIZ/SP-RING zinc finger//EF-hand domain pair	GO:0016246//GO:0050658	RNA interference//RNA transport	GO:0008270//GO:0005515//GO:0005509	zinc ion binding//protein binding//calcium ion binding	GO:0005770	late endosome	KOG0040	Ca2+-binding actin-bundling protein (spectrin), alpha chain (EF-Hand protein superfamily)	UP	8.0604	1.35e-08	blast,frame:3 start:585 end:8087
Cluster-41647.6940	87	669	906	0	3	0	2.61	20	27.2	0	0.09	0	1391	1343970997	XP_023929168.1	426	4e-39	60S ribosomal protein L21-A-like [Quercus suber]	--	--	--	--	--	K02889	RP-L21e, RPL21	large subunit ribosomal protein L21e	http://www.genome.jp/dbget-bin/www_bget?ko:K02889	P46778	530	1.3e-52	60S ribosomal protein L21 OS=Homo sapiens OX=9606 GN=RPL21 PE=1 SV=2	PF05841//PF01157	Apc15p protein//Ribosomal protein L21e	GO:0030071//GO:0042254//GO:0031145//GO:0006412	regulation of mitotic metaphase/anaphase transition//ribosome biogenesis//anaphase-promoting complex-dependent catabolic process//translation	GO:0003735	structural constituent of ribosome	GO:0005840//GO:0005680	ribosome//anaphase-promoting complex	KOG1732	60S ribosomal protein L21	UP	9.0399	1.36e-08	blast,frame:-3 start:1164 end:655
Cluster-41647.5868	130	793.81	1248	8	6	0	0.66	4.11	6.46	0.04	0.03	0	6894	1279040747	XP_022878695.1	934	2.5e-97	3-hydroxy-3-methylglutaryl-coenzyme A reductase-like [Olea europaea var. sylvestris]	XM_003216255.3	XM_003216255	46	2.19e-11	PREDICTED: Anolis carolinensis 3-hydroxy-3-methylglutaryl-CoA reductase (hmgcr), mRNA	K00021	HMGCR	hydroxymethylglutaryl-CoA reductase (NADPH)	http://www.genome.jp/dbget-bin/www_bget?ko:K00021	P04035	1044	1.7e-111	3-hydroxy-3-methylglutaryl-coenzyme A reductase OS=Homo sapiens OX=9606 GN=HMGCR PE=1 SV=1	PF05464//PF02950//PF00368//PF04147//PF04546//PF02761//PF09026//PF03896//PF01006//PF03286	Phi-29-like late genes activator (early protein GP4)//Conotoxin//Hydroxymethylglutaryl-coenzyme A reductase//Nop14-like family//Sigma-70, non-essential region//CBL proto-oncogene N-terminus, EF hand-like domain//Centromere protein B dimerisation domain//Translocon-associated protein (TRAP), alpha subunit//Hepatitis C virus non-structural protein NS4a//Pox virus Ag35 surface protein	GO:0006810//GO:0006144//GO:0009405//GO:0006351//GO:0016032//GO:0006206//GO:0006352//GO:0055114//GO:0006355//GO:0015936//GO:0006694	transport//purine nucleobase metabolic process//pathogenesis//transcription, DNA-templated//viral process//pyrimidine nucleobase metabolic process//DNA-templated transcription, initiation//oxidation-reduction process//regulation of transcription, DNA-templated//coenzyme A metabolic process//steroid biosynthetic process	GO:0003899//GO:0004420//GO:0003700//GO:0003677//GO:0005509//GO:0016987//GO:0003682//GO:0050662//GO:0008200	DNA-directed 5'-3' RNA polymerase activity//hydroxymethylglutaryl-CoA reductase (NADPH) activity//DNA-binding transcription factor activity//DNA binding//calcium ion binding//sigma factor activity//chromatin binding//obsolete coenzyme binding//ion channel inhibitor activity	GO:0019031//GO:0005667//GO:0005634//GO:0000775//GO:0005789//GO:0032040//GO:0005576//GO:0005730//GO:0019012//GO:0000785	viral envelope//transcription regulator complex//nucleus//chromosome, centromeric region//endoplasmic reticulum membrane//small-subunit processome//extracellular region//nucleolus//virion//chromatin	KOG2480	3-hydroxy-3-methylglutaryl-CoA (HMG-CoA) reductase	UP	7.3003	1.36e-08	blast,frame:-2 start:5390 end:3789
Cluster-41647.9858	65	846	956	4	4	0	0.98	12.9	14.59	0.06	0.06	0	2499	--	--	--	--	--	--	--	--	--	--	--	--	--	--	--	--	--	--	PF01348	Type II intron maturase	GO:0006397	mRNA processing	--	--	--	--	--	--	UP	7.8635	1.36e-08	--
Cluster-41647.36029	0	2	0	317.07	338.82	66.95	0	0.03	0	4.62	5.12	1.01	2546	--	--	--	--	--	--	--	--	--	--	--	--	--	--	--	--	--	--	--	--	--	--	--	--	--	--	--	--	DOWN	-8.5164	1.36e-08	estscan,start:1669 end:1785
Cluster-41647.24561	3008.55	2906.49	2808.82	493.99	465.84	154.98	193.85	181.78	177.71	30.19	29.58	9.82	789	116785054	ABK23572.1	538	2.4e-52	unknown [Picea sitchensis]	--	--	--	--	--	-	-	-	http://www.genome.jp/dbget-bin/www_bget?ko:-	I4DST8	300	3.6e-26	Tuliposide A-converting enzyme 1, chloroplastic OS=Tulipa gesneriana OX=13306 GN=TCEA1 PE=1 SV=1	PF07859//PF00326	alpha/beta hydrolase fold//Prolyl oligopeptidase family	GO:0006508	proteolysis	GO:0016787//GO:0008236	hydrolase activity//serine-type peptidase activity	--	--	--	--	UP	2.9457	1.36e-08	blast,frame:1 start:1 end:525
Cluster-41647.4457	41	374	396	0	0	0	0.48	4.4	4.66	0	0	0	3165	1032155025	OAO18220.1	342	5.1e-29	dnaj-like protein [Blastocystis sp. ATCC 50177/Nand II]	--	--	--	--	--	K09523	DNAJC3	DnaJ homolog subfamily C member 3	http://www.genome.jp/dbget-bin/www_bget?ko:K09523	Q5ZI13	713	1.8e-73	DnaJ homolog subfamily C member 3 OS=Gallus gallus OX=9031 GN=DNAJC3 PE=2 SV=1	PF00010//PF09726//PF00937//PF07655//PF13181//PF00515//PF10384	Helix-loop-helix DNA-binding domain//Macoilin family//Coronavirus nucleocapsid//Secretin N-terminal domain//Tetratricopeptide repeat//Tetratricopeptide repeat//Centromere protein Scm3	GO:0009297//GO:0023041	pilus assembly//neuronal signal transduction	GO:0005515//GO:0042393//GO:0046983	protein binding//histone binding//protein dimerization activity	GO:0005634//GO:0019867//GO:0019013//GO:0030867	nucleus//outer membrane//viral nucleocapsid//rough endoplasmic reticulum membrane	KOG0624	dsRNA-activated protein kinase inhibitor P58, contains TPR and DnaJ domains	UP	10.444	1.4e-08	blast,frame:2 start:1478 end:3103
Cluster-41647.27328	323	611	1483	32	18	38	29.55	53.25	131.43	2.73	1.6	3.37	633	148908215	ABR17222.1	247	1e-18	unknown [Picea sitchensis]	--	--	--	--	--	K21483	-	-	http://www.genome.jp/dbget-bin/www_bget?ko:K21483	Q9FZN8	200	1.1e-14	Caffeine synthase 1 OS=Camellia sinensis OX=4442 GN=TCS1 PE=1 SV=1	PF03492	SAM dependent carboxyl methyltransferase	--	--	GO:0008168	methyltransferase activity	--	--	--	--	UP	4.6886	1.4e-08	blast,frame:3 start:3 end:464
Cluster-41647.22226	6166.3	8119.89	7725.04	1568.3	524	624.94	269.21	349.41	334.85	65.89	22.85	27.16	1039	116783306	ABK22883.1	257	1.2e-19	unknown [Picea sitchensis]	--	--	--	--	--	-	-	-	http://www.genome.jp/dbget-bin/www_bget?ko:-	Q05736	150	1.2e-08	Pathogenesis-related protein 1 OS=Asparagus officinalis OX=4686 GN=PR1 PE=2 SV=1	PF00407	Pathogenesis-related protein Bet v 1 family	GO:0006952	defense response	--	--	--	--	--	--	UP	3.0031	1.41e-08	blast,frame:3 start:249 end:512|blast,frame:2 start:479 end:835
Cluster-41647.13535	485	532	477	198	199	144	3.7	4.11	3.68	1.49	1.55	1.12	4698	922545319	XP_013600449.1	270	1.7e-20	PREDICTED: uncharacterized protein LOC106307904 [Brassica oleracea var. oleracea]	--	--	--	--	--	-	-	-	http://www.genome.jp/dbget-bin/www_bget?ko:-	Q9ZV53	197	1.9e-13	Putative RING-H2 finger protein ATL49 OS=Arabidopsis thaliana OX=3702 GN=ATL49 PE=3 SV=1	PF01691//PF12861//PF00097//PF12906//PF12678	Adenovirus E1B 19K protein / small t-antigen//Anaphase-promoting complex subunit 11 RING-H2 finger//Zinc finger, C3HC4 type (RING finger)//RING-variant domain//RING-H2 zinc finger domain	GO:0016567//GO:0019050	protein ubiquitination//suppression by virus of host apoptotic process	GO:0008270//GO:0046872//GO:0004842	zinc ion binding//metal ion binding//ubiquitin-protein transferase activity	GO:0005680	anaphase-promoting complex	--	--	UP	1.3968	1.43e-08	blast,frame:-2 start:2336 end:1290
Cluster-38549.0	63	559.03	856	4	3	0	0.59	5.26	8.06	0.04	0.03	0	3900	1227897144	XP_021898674.1	551	3.6e-53	LOW QUALITY PROTEIN: sugar transporter ERD6-like 6 [Carica papaya]	XM_030681098.1	XM_030681098	51	2.05e-14	PREDICTED: Rhodamnia argentea facilitated trehalose transporter Tret1-like (LOC115745531), mRNA	K08145	SLC2A8, GLUT8	MFS transporter, SP family, solute carrier family 2 (facilitated glucose transporter), member 8	http://www.genome.jp/dbget-bin/www_bget?ko:K08145	Q8MKK4	671	1.7e-68	Facilitated trehalose transporter Tret1-2 homolog OS=Drosophila melanogaster OX=7227 GN=Tret1-2 PE=2 SV=1	PF01777//PF02965//PF00083//PF06220//PF06859//PF07690	Ribosomal L27e protein family//Vitamin B12 dependent methionine synthase, activation domain//Sugar (and other) transporter//U1 zinc finger//Bicoid-interacting protein 3 (Bin3)//Major Facilitator Superfamily	GO:0055085//GO:0006412//GO:0009086//GO:0042254	transmembrane transport//translation//methionine biosynthetic process//ribosome biogenesis	GO:0008270//GO:0003735//GO:0008705//GO:0008168//GO:0022857	zinc ion binding//structural constituent of ribosome//methionine synthase activity//methyltransferase activity//transmembrane transporter activity	GO:0005840//GO:0016021	ribosome//integral component of membrane	KOG0254	Predicted transporter (major facilitator superfamily)	UP	7.7291	1.43e-08	blast,frame:-2 start:1982 end:468
Cluster-41647.5085	36.58	504.96	622.34	0	0	0	0.3	4.25	5.24	0	0	0	4331	1359823117	PRW58449.1	2996	0	isoleucine--tRNA cytoplasmic isoform B [Chlorella sorokiniana]	XM_009572685.1	XM_009572685	128	3.58e-57	PREDICTED: Fulmarus glacialis isoleucyl-tRNA synthetase (IARS), partial mRNA	K01870	IARS, ileS	isoleucyl-tRNA synthetase	http://www.genome.jp/dbget-bin/www_bget?ko:K01870	Q8BU30	3432	0	Isoleucine--tRNA ligase, cytoplasmic OS=Mus musculus OX=10090 GN=Iars1 PE=1 SV=2	PF00133//PF08264//PF09334//PF10185	tRNA synthetases class I (I, L, M and V)//Anticodon-binding domain of tRNA ligase//tRNA synthetases class I (M)//Chaperone for wingless signalling and trafficking of LDL receptor	GO:0006457//GO:0006418	protein folding//tRNA aminoacylation for protein translation	GO:0004812//GO:0000166//GO:0005524	aminoacyl-tRNA ligase activity//nucleotide binding//ATP binding	--	--	KOG0434	Isoleucyl-tRNA synthetase	UP	10.968	1.43e-08	blast,frame:2 start:41 end:3370
Cluster-41647.5960	68	331	647	4	2	0	0.57	2.8	5.48	0.03	0.02	0	4306	--	--	--	--	--	--	--	--	--	--	--	--	--	--	Q24524	320	9.3e-28	Protein singed OS=Drosophila melanogaster OX=7227 GN=sn PE=1 SV=1	PF03498//PF06268	Cytolethal distending toxin A/C domain//Fascin domain	GO:0009405	pathogenesis	GO:0051015//GO:0030674	actin filament binding//protein-macromolecule adaptor activity	--	--	--	--	UP	7.4599	1.44e-08	blast,frame:1 start:1291 end:3609
Cluster-41647.4919	44	299	523	0	0	0	1.37	9.23	16.23	0	0	0	1354	530728285	EQC26527.1	438	1.6e-40	hypothetical protein SDRG_15620 [Saprolegnia diclina VS20]	--	--	--	--	--	K10251	HSD17B12, KAR, IFA38	17beta-estradiol 17-dehydrogenase / very-long-chain 3-oxoacyl-CoA reductase [EC:1.1.1.62 1.1.1.330]	http://www.genome.jp/dbget-bin/www_bget?ko:K10251	Q5E9H7	578	3.5e-58	Very-long-chain 3-oxoacyl-CoA reductase OS=Bos taurus OX=9913 GN=HSD17B12 PE=2 SV=1	PF02737//PF00265//PF01370	3-hydroxyacyl-CoA dehydrogenase, NAD binding domain//Thymidine kinase//NAD dependent epimerase/dehydratase family	GO:0006230//GO:0006568//GO:0006574//GO:0006206//GO:0006552//GO:0055114//GO:0006550//GO:0006631//GO:0006554//GO:0006633//GO:0018874	TMP biosynthetic process//tryptophan metabolic process//valine catabolic process//pyrimidine nucleobase metabolic process//leucine catabolic process//oxidation-reduction process//isoleucine catabolic process//fatty acid metabolic process//lysine catabolic process//fatty acid biosynthetic process//benzoate metabolic process	GO:0003824//GO:0005524//GO:0016491//GO:0004797//GO:0050662//GO:0003857	catalytic activity//ATP binding//oxidoreductase activity//thymidine kinase activity//obsolete coenzyme binding//3-hydroxyacyl-CoA dehydrogenase activity	--	--	KOG1014	17 beta-hydroxysteroid dehydrogenase type 3, HSD17B3	UP	10.546	1.44e-08	blast,frame:-1 start:1105 end:86
Cluster-27025.0	44	261	263.01	0	0	0	0.45	2.67	2.69	0	0	0	3606	--	--	--	--	--	XM_030680373.1	XM_030680373	186	1.7e-89	PREDICTED: Rhodamnia argentea catenin alpha-like (LOC115744959), mRNA	--	--	--	--	P35220	2386	2.1e-267	Catenin alpha OS=Drosophila melanogaster OX=7227 GN=alpha-Cat PE=1 SV=2	PF05225//PF15499//PF01044	helix-turn-helix, Psq domain//Ubiquitin-specific peptidase-like, SUMO isopeptidase//Vinculin family	GO:0007155	cell adhesion	GO:0070140//GO:0003677//GO:0051015//GO:0032183	SUMO-specific isopeptidase activity//DNA binding//actin filament binding//SUMO binding	--	--	KOG3681	Alpha-catenin	UP	9.9298	1.44e-08	blast,frame:-1 start:2994 end:169
Cluster-41647.11604	71	795	1100	2	0	0	0.93	10.45	14.48	0.03	0	0	2859	545702981	XP_005703818.1	2124	1.1e-235	molecular chaperone DnaK [Galdieria sulphuraria]	KY922620.1	KY922620	649	0	Trisetacus piceae voucher UMMZ BMOC 15-0717-011 AD1923 heat shock protein cognate 5 (Hsc70-5) gene, partial cds	K03283	HSPA1_8	heat shock 70kDa protein 1/8	http://www.genome.jp/dbget-bin/www_bget?ko:K03283	P38646	2356	5.1e-264	Stress-70 protein, mitochondrial OS=Homo sapiens OX=9606 GN=HSPA9 PE=1 SV=2	PF06736//PF02782	Protein of unknown function (DUF1211)//FGGY family of carbohydrate kinases, C-terminal domain	GO:0006813//GO:0005975	potassium ion transport//carbohydrate metabolic process	GO:0016773//GO:0005267	phosphotransferase activity, alcohol group as acceptor//potassium channel activity	--	--	KOG0102	Molecular chaperones mortalin/PBP74/GRP75, HSP70 superfamily	UP	9.9531	1.45e-08	blast,frame:-2 start:2684 end:603
Cluster-43112.0	47	520	602	2	2	0	0.96	10.64	12.34	0.04	0.04	0	1923	1387798538	PWA65787.1	1671	2.4e-183	T-complex protein 1 subunit eta [Artemisia annua]	XM_012405873.2	XM_012405873	67	1.28e-23	PREDICTED: Athalia rosae T-complex protein 1 subunit eta (LOC105689103), mRNA	K09499	CCT7	T-complex protein 1 subunit eta	http://www.genome.jp/dbget-bin/www_bget?ko:K09499	Q5ZJK8	1890	3.7e-210	T-complex protein 1 subunit eta OS=Gallus gallus OX=9031 GN=CCT7 PE=1 SV=1	PF00118//PF06506	TCP-1/cpn60 chaperonin family//Propionate catabolism activator	GO:0000160	phosphorelay signal transduction system	GO:0005524//GO:0000156//GO:0003677	ATP binding//phosphorelay response regulator activity//DNA binding	--	--	KOG0361	Chaperonin complex component, TCP-1 eta subunit (CCT7)	UP	8.17	1.45e-08	blast,frame:-1 start:1818 end:202
Cluster-41647.4373	54	422	626	3	2	0	0.47	3.69	5.47	0.03	0.02	0	4184	1426015533	GBG81206.1	180	4.1e-10	hypothetical protein CBR_g31878 [Chara braunii]	--	--	--	--	--	K07252	E3.6.1.43	dolichyldiphosphatase	http://www.genome.jp/dbget-bin/www_bget?ko:K07252	Q6UB99	156	9.4e-09	Ankyrin repeat domain-containing protein 11 OS=Homo sapiens OX=9606 GN=ANKRD11 PE=1 SV=3	--	--	--	--	--	--	--	--	--	--	UP	7.7825	1.45e-08	blast,frame:-1 start:3614 end:1041
Cluster-41647.7859	93	736	999	4	0	0	4.58	35.58	48.7	0.19	0	0	951	1426029452	GBG67751.1	370	8.6e-33	hypothetical protein CBR_g878 [Chara braunii]	--	--	--	--	--	K02947	RP-S10e, RPS10	small subunit ribosomal protein S10e	http://www.genome.jp/dbget-bin/www_bget?ko:K02947	P63326	389	2e-36	40S ribosomal protein S10 OS=Rattus norvegicus OX=10116 GN=Rps10 PE=2 SV=1	--	--	--	--	--	--	--	--	KOG3344	40s ribosomal protein s10	UP	8.8838	1.46e-08	blast,frame:2 start:209 end:730
Cluster-39553.0	61	329	380	4	2	0	0.96	5.19	6	0.06	0.03	0	2423	--	--	--	--	--	--	--	--	--	--	--	--	--	--	Q9XSK2	191	4.8e-13	CD63 antigen OS=Bos taurus OX=9913 GN=CD63 PE=2 SV=4	PF00335//PF00487//PF01213	Tetraspanin family//Fatty acid desaturase//Adenylate cyclase associated (CAP) N terminal	GO:0007010//GO:0006629	cytoskeleton organization//lipid metabolic process	GO:0003779	actin binding	GO:0016021	integral component of membrane	--	--	UP	7.0052	1.48e-08	blast,frame:3 start:807 end:1883
Cluster-37523.0	44	244	257	0	0	0	0.49	2.73	2.87	0	0	0	3320	1389808170	XP_024968611.1	376	6.1e-33	protein Jade-1 [Cynara cardunculus var. scolymus]	--	--	--	--	--	K11380	NTO1	NuA3 HAT complex component NTO1	http://www.genome.jp/dbget-bin/www_bget?ko:K11380	P55197	810	1.1e-84	Protein AF-10 OS=Homo sapiens OX=9606 GN=MLLT10 PE=1 SV=2	--	--	--	--	--	--	--	--	KOG0956	PHD finger protein AF10	UP	9.8708	1.5e-08	blast,frame:-1 start:3005 end:351
Cluster-41647.34996	54	594	772	1	1	0	4.35	45.97	60.64	0.08	0.08	0	683	1333488933	PNR60607.1	564	2e-55	hypothetical protein PHYPA_003400 [Physcomitrella patens]	--	--	--	--	--	K02880	RP-L17e, RPL17	large subunit ribosomal protein L17e	http://www.genome.jp/dbget-bin/www_bget?ko:K02880	Q4PM54	678	4.5e-70	60S ribosomal protein L17 OS=Ixodes scapularis OX=6945 GN=RpL17 PE=2 SV=1	PF00237	Ribosomal protein L22p/L17e	GO:0042254//GO:0006412	ribosome biogenesis//translation	GO:0003735	structural constituent of ribosome	GO:0005840	ribosome	KOG3353	60S ribosomal protein L22	UP	9.4375	1.5e-08	blast,frame:-3 start:660 end:58
Cluster-41647.31110	97	1040	1249.42	3	7	0	1.95	21.02	25.31	0.06	0.14	0	1943	1279028771	XP_022873619.1	193	5.9e-12	glycine-rich protein 2-like [Olea europaea var. sylvestris]	--	--	--	--	--	K09250	CNBP	cellular nucleic acid-binding protein	http://www.genome.jp/dbget-bin/www_bget?ko:K09250	P41824	360	9.7e-33	Y-box factor homolog OS=Aplysia californica OX=6500 PE=2 SV=1	PF00313	'Cold-shock' DNA-binding domain	--	--	GO:0003676	nucleic acid binding	--	--	KOG3070	Predicted RNA-binding protein containing PIN domain and invovled in translation or RNA processing	UP	7.8691	1.5e-08	blast,frame:2 start:167 end:1396
Cluster-41647.24427	1956.99	4216.96	3072.87	404	106	144	76.02	162.04	118.82	15.15	4.13	5.58	1135	1248280957	ATG29974.1	1256	1.9e-135	CYP76AA69 [Taxus chinensis]	--	--	--	--	--	-	-	-	http://www.genome.jp/dbget-bin/www_bget?ko:-	Q8VWZ7	413	4e-39	Geraniol 8-hydroxylase OS=Catharanthus roseus OX=4058 GN=CYP76B6 PE=1 SV=1	PF00067	Cytochrome P450	GO:0055114	oxidation-reduction process	GO:0016705//GO:0005506//GO:0020037	oxidoreductase activity, acting on paired donors, with incorporation or reduction of molecular oxygen//iron ion binding//heme binding	--	--	--	--	UP	3.814	1.53e-08	estscan,start:285 end:1135
Cluster-41647.3841	40	366.05	488	0	0	0	0.21	1.97	2.63	0	0	0	6627	1249692696	XP_022545023.1	822	2.3e-84	histone acetyltransferase HAC1 isoform X1 [Brassica napus]	XM_015523433.1	XM_015523433	155	5.37e-72	PREDICTED: Diuraphis noxia CREB-binding protein-like (LOC107173067), mRNA	K04498	EP300, CREBBP, KAT3	E1A/CREB-binding protein	http://www.genome.jp/dbget-bin/www_bget?ko:K04498	Q6JHU9	1919	5.5e-213	Histone lysine acetyltransferase CREBBP OS=Rattus norvegicus OX=10116 GN=Crebbp PE=1 SV=1	PF08214//PF00039//PF02172//PF02135//PF00569//PF00439//PF10717	Histone acetylation protein//Fibronectin type I domain//KIX domain//TAZ zinc finger//Zinc finger, ZZ type//Bromodomain//Occlusion-derived virus envelope protein ODV-E18	GO:0016573//GO:0006355//GO:0042967	histone acetylation//regulation of transcription, DNA-templated//obsolete acyl-carrier-protein biosynthetic process	GO:0003712//GO:0008270//GO:0005515//GO:0004402	transcription coregulator activity//zinc ion binding//protein binding//histone acetyltransferase activity	GO:0000123//GO:0042025//GO:0005667//GO:0019031//GO:0005576	histone acetyltransferase complex//host cell nucleus//transcription regulator complex//viral envelope//extracellular region	KOG1778	CREB binding protein/P300 and related TAZ Zn-finger proteins	UP	10.588	1.53e-08	blast,frame:-2 start:6395 end:3
Cluster-41647.9723	65	391	779.87	1	1	0	1.21	7.33	14.65	0.02	0.02	0	2076	--	--	--	--	--	--	--	--	--	--	-	-	-	http://www.genome.jp/dbget-bin/www_bget?ko:-	--	--	--	--	PF14984	CD24 protein	GO:0007155	cell adhesion	--	--	--	--	--	--	UP	9.2413	1.54e-08	estscan,start:1629 end:487; minus strand
Cluster-41647.6332	41	374	775	0	0	0	0.48	4.4	9.12	0	0	0	3169	1129190138	OLP95433.1	156	1.9e-07	Alpha-agarase [Symbiodinium microadriaticum]	--	--	--	--	--	--	--	--	--	Q61830	335	1.2e-29	Macrophage mannose receptor 1 OS=Mus musculus OX=10090 GN=Mrc1 PE=1 SV=2	--	--	--	--	--	--	--	--	--	--	UP	11.007	1.57e-08	blast,frame:1 start:469 end:2937
Cluster-41647.9501	560	451	665	26	38	4	30.12	23.73	35.32	1.34	2.03	0.21	893	148908726	ABR17470.1	158	3.1e-08	unknown [Picea sitchensis]	--	--	--	--	--	--	--	--	--	--	--	--	--	PF15699//PF00020	NPR1 interacting//TNFR/NGFR cysteine-rich region	GO:0010112	regulation of systemic acquired resistance	GO:0005515	protein binding	--	--	--	--	UP	4.6054	1.57e-08	blast,frame:-2 start:769 end:248
Cluster-41647.3345	41	325	402	0	0	0	0.58	4.67	5.78	0	0	0	2639	546307596	XP_005713380.1	727	9.6e-74	20S core proteasome subunit beta 5 [Chondrus crispus]	XM_026473282.1	XM_026473282	96	1.33e-39	PREDICTED: Hyposmocoma kahamanoa peptidyl-prolyl cis-trans isomerase H (LOC113237041), mRNA	K02737	PSMB5	20S proteasome subunit beta 5	http://www.genome.jp/dbget-bin/www_bget?ko:K02737	Q32KL2	718	4e-74	Proteasome subunit beta type-5 OS=Bos taurus OX=9913 GN=PSMB5 PE=1 SV=1	PF00160//PF00227	Cyclophilin type peptidyl-prolyl cis-trans isomerase/CLD//Proteasome subunit	GO:0000413//GO:0051603	protein peptidyl-prolyl isomerization//proteolysis involved in cellular protein catabolic process	GO:0004298//GO:0003755	threonine-type endopeptidase activity//peptidyl-prolyl cis-trans isomerase activity	GO:0005839	proteasome core complex	KOG0175	20S proteasome, regulatory subunit beta type PSMB5/PSMB8/PRE2	UP	10.368	1.57e-08	blast,frame:3 start:204 end:1058
Cluster-41647.9074	64	307	490	4	2	0	0.88	4.24	6.78	0.05	0.03	0	2732	--	--	--	--	--	--	--	--	--	--	--	--	--	--	E1C8P7	332	2.4e-29	Down syndrome cell adhesion molecule-like protein 1 homolog OS=Gallus gallus OX=9031 GN=DSCAML1 PE=1 SV=2	PF16656//PF00041//PF04906	Purple acid Phosphatase, N-terminal domain//Fibronectin type III domain//Tweety	GO:0019497//GO:0006771	hexachlorocyclohexane metabolic process//riboflavin metabolic process	GO:0005515//GO:0046872//GO:0003993	protein binding//metal ion binding//acid phosphatase activity	GO:0016021	integral component of membrane	--	--	UP	7.1732	1.6e-08	blast,frame:-1 start:2732 end:1059
Cluster-23952.0	92	778	868.13	7	4	0	0.6	5.12	5.71	0.04	0.03	0	5474	1338279496	POM76449.1	763	1.3e-77	CMGC/MAPK protein Kinase [Phytophthora palmivora var. palmivora]	XM_024654515.1	XM_024654515	150	2.67e-69	Strongyloides ratti Nemo-like kinase (SRAE_2000333400), partial mRNA	K20535	MPK1_2	mitogen-activated protein kinase 1/2	http://www.genome.jp/dbget-bin/www_bget?ko:K20535	Q9UBE8	1570	1.3e-172	Serine/threonine-protein kinase NLK OS=Homo sapiens OX=9606 GN=NLK PE=1 SV=2	PF00069//PF11593//PF01363//PF07714	Protein kinase domain//Mediator complex subunit 3 fungal//FYVE zinc finger//Protein tyrosine and serine/threonine kinase	GO:0006357//GO:0006468	regulation of transcription by RNA polymerase II//protein phosphorylation	GO:0046872//GO:0003712//GO:0004672//GO:0005524	metal ion binding//transcription coregulator activity//protein kinase activity//ATP binding	GO:0005667//GO:0016592	transcription regulator complex//mediator complex	KOG0664	Nemo-like MAPK-related serine/threonine protein kinase	UP	7.3271	1.62e-08	blast,frame:-2 start:3073 end:1790
Cluster-41647.16129	3027.47	4365.09	5292.79	1168.17	833.05	667.06	69.71	100.63	122.38	26.27	19.43	15.49	1733	1173211844	BAX09107.1	875	4.3e-91	protein kinase [Cryptomeria japonica]	--	--	--	--	--	-	-	-	http://www.genome.jp/dbget-bin/www_bget?ko:-	O65924	427	1.5e-40	Putative leucine-rich repeat receptor-like protein kinase At2g19210 OS=Arabidopsis thaliana OX=3702 GN=At2g19210 PE=1 SV=1	PF07714//PF00069	Protein tyrosine and serine/threonine kinase//Protein kinase domain	GO:0006468	protein phosphorylation	GO:0004672//GO:0005524	protein kinase activity//ATP binding	--	--	--	--	UP	2.203	1.62e-08	blast,frame:3 start:3 end:1364
Cluster-41647.9943	73	532.57	758	5	1	0	1.35	9.87	14.08	0.09	0.02	0	2097	566011325	ETI34236.1	1714	2.7e-188	T-complex protein 1, alpha subunit [Phytophthora parasitica P1569]	XM_019912332.1	XM_019912332	104	3.77e-44	PREDICTED: Dendroctonus ponderosae T-complex protein 1 subunit alpha (LOC109542882), mRNA	K09493	CCT1, TCP1	T-complex protein 1 subunit alpha	http://www.genome.jp/dbget-bin/www_bget?ko:K09493	P12613	1763	2.1e-195	T-complex protein 1 subunit alpha OS=Drosophila melanogaster OX=7227 GN=CCT1 PE=2 SV=2	PF00118	TCP-1/cpn60 chaperonin family	--	--	GO:0005524	ATP binding	--	--	KOG0360	Chaperonin complex component, TCP-1 alpha subunit (CCT1)	UP	7.866	1.62e-08	blast,frame:-1 start:1971 end:352
Cluster-14809.0	62	480	551.06	2	4	0	0.69	5.4	6.2	0.02	0.05	0	3303	1559527812	RWV76826.1	297	8.7e-24	hypothetical protein GW17_00062450, partial [Ensete ventricosum]	--	--	--	--	--	-	-	-	http://www.genome.jp/dbget-bin/www_bget?ko:-	Q5U4S8	985	5.5e-105	Ceramide glucosyltransferase-B OS=Xenopus laevis OX=8355 GN=ugcg-b PE=2 SV=1	PF08395//PF13506	7tm Chemosensory receptor//Glycosyl transferase family 21	GO:0050909	sensory perception of taste	GO:0016757	transferase activity, transferring glycosyl groups	GO:0016021	integral component of membrane	KOG2547	Ceramide glucosyltransferase	UP	7.4742	1.64e-08	blast,frame:1 start:1537 end:2940
Cluster-41647.8108	38	430	444	0	0	0	0.23	2.61	2.69	0	0	0	5923	641531754	KDO25808.1	310	4.9e-25	hypothetical protein SPRG_08751 [Saprolegnia parasitica CBS 223.65]	--	--	--	--	--	-	-	-	http://www.genome.jp/dbget-bin/www_bget?ko:-	P49815	749	2.3e-77	Tuberin OS=Homo sapiens OX=9606 GN=TSC2 PE=1 SV=2	PF02145//PF03542	Rap/ran-GAP//Tuberin	GO:0043547//GO:0051056	positive regulation of GTPase activity//regulation of small GTPase mediated signal transduction	GO:0005096	GTPase activator activity	--	--	KOG3687	Tuberin - Rap/ran-GTPase-activating protein	UP	10.613	1.64e-08	blast,frame:2 start:347 end:5761
Cluster-41647.4394	37	496	457	0	0	0	0.45	6.1	5.62	0	0	0	3042	1344029198	XP_023897676.1	1000	2.4e-105	aspartate aminotransferase, cytoplasmic-like [Quercus suber]	XM_031699003.1	XM_031699003	58	2.05e-18	PREDICTED: Actinia tenebrosa transcription factor Dp-1-like (LOC116291793), mRNA	K14454	GOT1	aspartate aminotransferase, cytoplasmic	http://www.genome.jp/dbget-bin/www_bget?ko:K14454	P00504	1112	9.6e-120	Aspartate aminotransferase, cytoplasmic OS=Gallus gallus OX=9031 GN=GOT1 PE=1 SV=3	PF00155//PF02319//PF02563	Aminotransferase class I and II//E2F/DP family winged-helix DNA-binding domain//Polysaccharide biosynthesis/export protein	GO:0015774//GO:0009058//GO:0006355	polysaccharide transport//biosynthetic process//regulation of transcription, DNA-templated	GO:0003700//GO:0015159//GO:0030170	DNA-binding transcription factor activity//polysaccharide transmembrane transporter activity//pyridoxal phosphate binding	GO:0005667//GO:0016020	transcription regulator complex//membrane	KOG1411	Aspartate aminotransferase/Glutamic oxaloacetic transaminase AAT1/GOT2	UP	10.73	1.64e-08	blast,frame:2 start:1559 end:1750|blast,frame:3 start:105 end:1391
Cluster-41647.16108	1564	1661	2760	281	277	104	61.24	64.33	107.57	10.62	10.87	4.07	1128	1193743215	XP_020991830.1	316	1.9e-26	uncharacterized protein LOC107476147 isoform X2 [Arachis duranensis]	--	--	--	--	--	-	-	-	http://www.genome.jp/dbget-bin/www_bget?ko:-	--	--	--	--	--	--	--	--	--	--	--	--	--	--	UP	3.1519	1.64e-08	blast,frame:1 start:193 end:873
Cluster-41647.7972	42	277	360	0	0	0	0.42	2.81	3.66	0	0	0	3631	--	--	--	--	--	--	--	--	--	--	--	--	--	--	Q8N103	340	3.8e-30	T-cell activation Rho GTPase-activating protein OS=Homo sapiens OX=9606 GN=TAGAP PE=1 SV=1	PF00620	RhoGAP domain	GO:0007165	signal transduction	--	--	--	--	--	--	UP	10.191	1.67e-08	blast,frame:1 start:1 end:3630
Cluster-41647.27011	56	499	921	1	1	0	3.75	32.38	60.49	0.06	0.07	0	769	195649157	ACG44046.1	780	2e-80	60S ribosomal protein L11 [Zea mays]	XM_022475787.1	XM_022475787	136	2.18e-62	PREDICTED: Crassostrea virginica 60S ribosomal protein L11-like (LOC111129410), mRNA	K02868	RP-L11e, RPL11	large subunit ribosomal protein L11e	http://www.genome.jp/dbget-bin/www_bget?ko:K02868	P46222	782	4.5e-82	60S ribosomal protein L11 OS=Drosophila melanogaster OX=7227 GN=RpL11 PE=1 SV=2	--	--	--	--	--	--	--	--	KOG0397	60S ribosomal protein L11	UP	9.4989	1.67e-08	blast,frame:-1 start:712 end:26
Cluster-41647.6568	83	729	1050	0	3	0	0.5	4.46	6.42	0	0.02	0	5872	1371070130	XP_024315949.1	996	1.4e-104	heat shock 70 kDa protein 15 [Brachypodium distachyon]	--	--	--	--	--	K09489	HSPA4	heat shock 70kDa protein 4	http://www.genome.jp/dbget-bin/www_bget?ko:K09489	Q61316	1018	1.5e-108	Heat shock 70 kDa protein 4 OS=Mus musculus OX=10090 GN=Hspa4 PE=1 SV=1	PF00076//PF07728//PF06309//PF05970//PF07724//PF05843//PF00004	RNA recognition motif. (a.k.a. RRM, RBD, or RNP domain)//AAA domain (dynein-related subfamily)//Torsin//PIF1-like helicase//AAA domain (Cdc48 subfamily)//Suppressor of forked protein (Suf)//ATPase family associated with various cellular activities (AAA)	GO:0000723//GO:0006397//GO:0006281	telomere maintenance//mRNA processing//DNA repair	GO:0003678//GO:0003676//GO:0005524//GO:0016887	DNA helicase activity//nucleic acid binding//ATP binding//ATPase activity	GO:0005657//GO:0005634	replication fork//nucleus	KOG0103	Molecular chaperones HSP105/HSP110/SSE1, HSP70 superfamily	UP	9.2045	1.68e-08	blast,frame:1 start:106 end:2406
Cluster-41647.6799	38	401	546	0	0	0	0.25	2.72	3.7	0	0	0	5324	1344013168	XP_023889212.1	2136	8e-237	metal resistance protein YCF1-like [Quercus suber]	XM_026191143.1	XM_026191143	75	1.28e-27	PREDICTED: Astatotilapia calliptera canalicular multispecific organic anion transporter 1-like (LOC113035525), transcript variant X2, mRNA	-	-	-	http://www.genome.jp/dbget-bin/www_bget?ko:-	Q8CG09	3080	0	Multidrug resistance-associated protein 1 OS=Rattus norvegicus OX=10116 GN=Abcc1 PE=1 SV=2	PF03193//PF00005//PF13304//PF06414//PF00664//PF01926	RsgA GTPase//ABC transporter//AAA domain, putative AbiEii toxin, Type IV TA system//Zeta toxin//ABC transporter transmembrane region//50S ribosome-binding GTPase	GO:0006810//GO:0055085	transport//transmembrane transport	GO:0042626//GO:0016301//GO:0016887//GO:0003924//GO:0005524//GO:0005525	ATPase-coupled transmembrane transporter activity//kinase activity//ATPase activity//GTPase activity//ATP binding//GTP binding	GO:0016021	integral component of membrane	--	--	UP	10.729	1.68e-08	blast,frame:-1 start:5075 end:444
Cluster-41647.23784	145.01	213.18	340.43	27.54	21.96	11	49.31	60	101.5	7.62	6.36	3.23	357	1104665184	XP_019081815.1	170	5e-10	PREDICTED: LRR receptor-like serine/threonine-protein kinase FLS2 isoform X2 [Vitis vinifera]	--	--	--	--	--	-	-	-	http://www.genome.jp/dbget-bin/www_bget?ko:-	Q0JA29	137	1.3e-07	LRR receptor-like serine/threonine-protein kinase FLS2 OS=Oryza sativa subsp. japonica OX=39947 GN=FLS2 PE=1 SV=1	PF13855//PF00560//PF13516	Leucine rich repeat//Leucine Rich Repeat//Leucine Rich repeat	--	--	GO:0005515	protein binding	--	--	--	--	UP	3.4856	1.69e-08	blast,frame:-1 start:357 end:1
Cluster-41647.7747	40	333	434.92	0	0	0	0.47	3.92	5.13	0	0	0	3163	870855087	KMT06835.1	1544	2.1e-168	hypothetical protein BVRB_7g159900 [Beta vulgaris subsp. vulgaris]	XM_024653686.1	XM_024653686	146	2.57e-67	Strongyloides ratti Alanine--tRNA ligase, mitochondrial (SRAE_2000259900), partial mRNA	K01872	AARS, alaS	alanyl-tRNA synthetase	http://www.genome.jp/dbget-bin/www_bget?ko:K01872	P21894	1630	8.6e-180	Alanine--tRNA ligase, cytoplasmic OS=Bombyx mori OX=7091 PE=1 SV=1	PF06821//PF01411//PF00201//PF04101	Serine hydrolase//tRNA synthetases class II (A)//UDP-glucoronosyl and UDP-glucosyl transferase//Glycosyltransferase family 28 C-terminal domain	GO:0006531//GO:0006522//GO:0006419	aspartate metabolic process//alanine metabolic process//alanyl-tRNA aminoacylation	GO:0004813//GO:0000166//GO:0016758//GO:0005524//GO:0016787	alanine-tRNA ligase activity//nucleotide binding//transferase activity, transferring hexosyl groups//ATP binding//hydrolase activity	--	--	KOG0188	Alanyl-tRNA synthetase	UP	10.442	1.69e-08	blast,frame:-1 start:1465 end:101
Cluster-41647.37365	366	259.28	952.37	37	17	24.22	11.18	7.89	29.1	1.1	0.52	0.74	1371	769799228	XP_006854926.2	255	2.7e-19	EG45-like domain containing protein [Amborella trichopoda]	--	--	--	--	--	-	-	-	http://www.genome.jp/dbget-bin/www_bget?ko:-	Q9ZP41	202	1.4e-14	EG45-like domain containing protein OS=Citrus jambhiri OX=64884 GN=CjBAp12 PE=1 SV=1	--	--	--	--	--	--	--	--	--	--	UP	4.2953	1.71e-08	blast,frame:2 start:2 end:409
Cluster-41647.9378	55	529	682	1	1	0	0.5	4.85	6.25	0.01	0.01	0	3999	1426011730	GBG84580.1	610	5.4e-60	hypothetical protein CBR_g38861 [Chara braunii]	--	--	--	--	--	K02328	POLD2	DNA polymerase delta subunit 2	http://www.genome.jp/dbget-bin/www_bget?ko:K02328	O93610	664	1.1e-67	DNA polymerase delta subunit 2 OS=Xenopus laevis OX=8355 GN=pold2 PE=2 SV=1	PF00522//PF02075//PF04042//PF07645	VPR/VPX protein//Crossover junction endodeoxyribonuclease RuvC//DNA polymerase alpha/epsilon subunit B//Calcium-binding EGF domain	GO:0019058//GO:0006308//GO:0006281//GO:0006260//GO:0006310	viral life cycle//DNA catabolic process//DNA repair//DNA replication//DNA recombination	GO:0005509//GO:0003677//GO:0004520	calcium ion binding//DNA binding//endodeoxyribonuclease activity	GO:0042025	host cell nucleus	KOG2732	DNA polymerase delta, regulatory subunit 55	UP	9.2707	1.73e-08	blast,frame:-2 start:3827 end:2442
Cluster-41647.20475	2777.9	3196.03	4124.74	942.73	664.68	797.21	142.42	160.58	209.1	46.26	33.87	40.5	924	1248280981	ATG29986.1	1079	5.1e-115	CYP720B24 [Taxus chinensis]	AK415118.1	AK415118	449	0	Cryptomeria japonica mRNA, clone: CSFL008_K15, expressed in reproductive shoots	-	-	-	http://www.genome.jp/dbget-bin/www_bget?ko:-	Q50EK5	896	3.2e-95	Cytochrome P450 720B2 OS=Pinus taeda OX=3352 GN=CYP720B2 PE=2 SV=1	PF00067	Cytochrome P450	GO:0055114	oxidation-reduction process	GO:0020037//GO:0005506//GO:0016705	heme binding//iron ion binding//oxidoreductase activity, acting on paired donors, with incorporation or reduction of molecular oxygen	--	--	--	--	UP	1.996	1.75e-08	blast,frame:3 start:3 end:872
Cluster-41647.3731	53	571	721	1	1	0	1.16	12.48	15.8	0.02	0.02	0	1815	1173956566	OQS03321.1	1652	3.6e-181	T-complex protein 1 subunit zeta [Thraustotheca clavata]	XM_028277958.1	XM_028277958	66	4.33e-23	PREDICTED: Diabrotica virgifera virgifera T-complex protein 1 subunit zeta (LOC114328963), mRNA	K09498	CCT6	T-complex protein 1 subunit zeta	http://www.genome.jp/dbget-bin/www_bget?ko:K09498	O77622	1796	2.8e-199	T-complex protein 1 subunit zeta OS=Oryctolagus cuniculus OX=9986 GN=CCT6 PE=1 SV=3	PF00118	TCP-1/cpn60 chaperonin family	--	--	GO:0005524	ATP binding	--	--	KOG0359	Chaperonin complex component, TCP-1 zeta subunit (CCT6)	UP	9.3585	1.75e-08	blast,frame:3 start:129 end:1766
Cluster-41647.18984	58	476	713	4	2.01	0	0.27	2.23	3.33	0.02	0.01	0	7604	1340489311	XP_023771209.1	309	8.2e-25	putative leucine-rich repeat-containing protein DDB_G0290503 [Lactuca sativa]	--	--	--	--	--	-	-	-	http://www.genome.jp/dbget-bin/www_bget?ko:-	Q9UPN3	2412	4.3e-270	Microtubule-actin cross-linking factor 1, isoforms 1/2/3/5 OS=Homo sapiens OX=9606 GN=MACF1 PE=1 SV=4	PF03393//PF06371//PF02427//PF06009//PF00435//PF13499//PF08649//PF00307//PF13405//PF02187//PF09036//PF13202//PF00036	Pneumovirus matrix protein//Diaphanous GTPase-binding Domain//Photosystem I reaction centre subunit IV / PsaE//Laminin Domain II//Spectrin repeat//EF-hand domain pair//DASH complex subunit Dad1//Calponin homology (CH) domain//EF-hand domain//Growth-Arrest-Specific Protein 2 Domain//Bcr-Abl oncoprotein oligomerisation domain//EF hand//EF hand	GO:0007052//GO:0007165//GO:0015979//GO:0016310//GO:0030036//GO:0019068//GO:0006468//GO:0009069//GO:0007155	mitotic spindle organization//signal transduction//photosynthesis//phosphorylation//actin cytoskeleton organization//virion assembly//protein phosphorylation//serine family amino acid metabolic process//cell adhesion	GO:0005509//GO:0003779//GO:0017048//GO:0008017//GO:0005096//GO:0005515//GO:0004674	calcium ion binding//actin binding//Rho GTPase binding//microtubule binding//GTPase activator activity//protein binding//protein serine/threonine kinase activity	GO:0072686//GO:0009522//GO:0009538//GO:0045298//GO:0019031//GO:0042729	mitotic spindle//photosystem I//photosystem I reaction center//tubulin complex//viral envelope//DASH complex	KOG0517	Beta-spectrin	UP	7.7136	1.78e-08	blast,frame:2 start:152 end:7498
Cluster-41647.9112	40	373.84	306.41	0	0	0	0.87	8.12	6.68	0	0	0	1824	--	--	--	--	--	--	--	--	--	--	--	--	--	--	--	--	--	--	--	--	--	--	--	--	--	--	--	--	UP	10.269	1.78e-08	estscan,start:478 end:1236
Cluster-41647.31327	85	466	625	0	3	0	0.63	3.48	4.67	0	0.02	0	4851	--	--	--	--	--	NG_012685.1	NG_012685	41	9.25e-09	Mus musculus predicted gene 8354 (Gm8354) pseudogene on chromosome 1	--	--	--	--	--	--	--	--	PF01988	VIT family	GO:0006828//GO:0030026	manganese ion transport//cellular manganese ion homeostasis	GO:0005384	manganese ion transmembrane transporter activity	--	--	--	--	UP	8.5412	1.78e-08	estscan,start:1 end:4374
Cluster-41647.8493	43	619	632	2	2	0	0.81	11.77	12.05	0.04	0.04	0	2050	--	--	--	--	--	--	--	--	--	--	--	--	--	--	--	--	--	--	PF17317//PF01312	Mating hormone A-factor 1&2//FlhB HrpN YscU SpaS Family	GO:0007165//GO:0009306//GO:0000750	signal transduction//protein secretion//pheromone-dependent signal transduction involved in conjugation with cellular fusion	GO:0000772	mating pheromone activity	GO:0016020	membrane	--	--	UP	8.3164	1.78e-08	estscan,start:290 end:979
Cluster-38929.0	53	106	198	0	0	0	0.59	1.2	2.24	0	0	0	3284	--	--	--	--	--	--	--	--	--	--	--	--	--	--	O76358	169	2.3e-10	Invertebrate-type lysozyme 2 OS=Caenorhabditis elegans OX=6239 GN=ilys-2 PE=2 SV=1	PF00543//PF05497//PF13405//PF13499//PF00404//PF00036	Nitrogen regulatory protein P-II//Destabilase//EF-hand domain//EF-hand domain pair//Dockerin type I domain//EF hand	GO:0005975//GO:0000272//GO:0006808	carbohydrate metabolic process//polysaccharide catabolic process//regulation of nitrogen utilization	GO:0004553//GO:0030234//GO:0003796//GO:0005509	hydrolase activity, hydrolyzing O-glycosyl compounds//enzyme regulator activity//lysozyme activity//calcium ion binding	--	--	--	--	UP	9.2671	1.79e-08	blast,frame:-1 start:2987 end:165
Cluster-41647.8320	115	1121	1101	8	6	0	1.29	12.68	12.46	0.09	0.07	0	3284	585105261	EWM23975.1	786	1.7e-80	stearoyl- desaturase 5 [Nannochloropsis gaditana]	XM_023368344.1	XM_023368344	42	1.73e-09	PREDICTED: Centruroides sculpturatus acyl-CoA desaturase-like (LOC111625247), mRNA	K00507	SCD, desC	stearoyl-CoA desaturase (Delta-9 desaturase)	http://www.genome.jp/dbget-bin/www_bget?ko:K00507	Q92038	941	7e-100	Acyl-CoA desaturase OS=Cyprinus carpio OX=7962 PE=2 SV=2	PF01582//PF00487//PF13676	TIR domain//Fatty acid desaturase//TIR domain	GO:0007165//GO:0006629	signal transduction//lipid metabolic process	GO:0005515	protein binding	--	--	KOG1600	Fatty acid desaturase	UP	7.4004	1.79e-08	blast,frame:-3 start:2640 end:1468
Cluster-41647.9701	41	289	401	0	0	0	0.59	4.21	5.85	0	0	0	2604	585108099	EWM26105.1	979	5.7e-103	cystathionine beta-synthase [Nannochloropsis gaditana]	--	--	--	--	--	K01697	E4.2.1.22, CBS	cystathionine beta-synthase	http://www.genome.jp/dbget-bin/www_bget?ko:K01697	Q58H57	1038	3.1e-111	Cystathionine beta-synthase OS=Macaca fascicularis OX=9541 GN=CBS PE=2 SV=3	PF02172	KIX domain	GO:0006355	regulation of transcription, DNA-templated	GO:0003712	transcription coregulator activity	GO:0005667	transcription regulator complex	KOG1252	Cystathionine beta-synthase and related enzymes	UP	10.298	1.79e-08	blast,frame:-2 start:2387 end:1170
Cluster-41647.10506	50	108	160	2	1	2	1.05	2.27	3.36	0.04	0.02	0.04	1881	--	--	--	--	--	--	--	--	--	--	--	--	--	--	--	--	--	--	--	--	--	--	--	--	--	--	--	--	UP	5.9217	1.79e-08	estscan,start:1476 end:842; minus strand
Cluster-37119.0	44	226	181	0	0	0	1.01	5.19	4.17	0	0	0	1739	--	--	--	--	--	XM_011303212.1	XM_011303212	59	3.23e-19	PREDICTED: Fopius arisanus segmentation protein Runt-like (LOC105265632), mRNA	--	--	--	--	Q9W349	498	8.6e-49	Protein lozenge OS=Drosophila melanogaster OX=7227 GN=lz PE=2 SV=2	PF02535//PF01080//PF00853//PF09726//PF00868	ZIP Zinc transporter//Presenilin//Runt domain//Macoilin family//Transglutaminase family	GO:0030001//GO:0055085//GO:0016485//GO:0018149//GO:0023041//GO:0006355	metal ion transport//transmembrane transport//protein processing//peptide cross-linking//neuronal signal transduction//regulation of transcription, DNA-templated	GO:0003677//GO:0004190//GO:0003700//GO:0046873	DNA binding//aspartic-type endopeptidase activity//DNA-binding transcription factor activity//metal ion transmembrane transporter activity	GO:0005667//GO:0030867//GO:0016021//GO:0016020	transcription regulator complex//rough endoplasmic reticulum membrane//integral component of membrane//membrane	KOG3982	Runt and related transcription factors	UP	9.5938	1.81e-08	blast,frame:2 start:455 end:1063
Cluster-36638.0	52	386	475	3	2	0	0.58	4.38	5.39	0.03	0.02	0	3275	--	--	--	--	--	--	--	--	--	--	--	--	--	--	Q3U3D7	199	7.6e-14	Transmembrane protein 131-like OS=Mus musculus OX=10090 GN=Tmem131l PE=1 SV=1	PF10717//PF11808	Occlusion-derived virus envelope protein ODV-E18//Phosphate regulon sensor protein PhoR	GO:0016310//GO:0000160//GO:0006470	phosphorylation//phosphorelay signal transduction system//protein dephosphorylation	GO:0000155//GO:0004721	phosphorelay sensor kinase activity//phosphoprotein phosphatase activity	GO:0009365//GO:0019031	protein histidine kinase complex//viral envelope	KOG3620	Uncharacterized conserved protein	UP	7.506	1.82e-08	blast,frame:-3 start:2505 end:226
Cluster-41647.7445	37	419	445.06	0	0	0	0.38	4.3	4.57	0	0	0	3597	971509174	GAQ89036.1	1445	7.2e-157	DNA replication licensing factor MCM7 component [Klebsormidium nitens]	XM_021146472.1	XM_021146472	125	1.38e-55	PREDICTED: Parasteatoda tepidariorum DNA replication licensing factor mcm7-B-like (LOC107446628), mRNA	-	-	-	http://www.genome.jp/dbget-bin/www_bget?ko:-	Q6NX31	1866	4.2e-207	DNA replication licensing factor mcm7 OS=Xenopus tropicalis OX=8364 GN=mcm7 PE=2 SV=1	PF07726//PF00158//PF00493//PF07728	ATPase family associated with various cellular activities (AAA)//Sigma-54 interaction domain//MCM P-loop domain//AAA domain (dynein-related subfamily)	GO:0006355//GO:0006270	regulation of transcription, DNA-templated//DNA replication initiation	GO:0008134//GO:0003677//GO:0016887//GO:0005524	transcription factor binding//DNA binding//ATPase activity//ATP binding	GO:0005667	transcription regulator complex	KOG0482	DNA replication licensing factor, MCM7 component	UP	10.596	1.84e-08	blast,frame:-3 start:3259 end:1055
Cluster-41647.5774	58	517	751	0	1	0	4.24	36.43	53.62	0	0.07	0	727	325190343	CCA24817.1	564	2.1e-55	40S ribosomal protein S16 putative [Albugo laibachii Nc14]	XM_014376454.1	XM_014376454	49	4.75e-14	PREDICTED: Trichogramma pretiosum 40S ribosomal protein S16-like (LOC106655871), mRNA	K02960	RP-S16e, RPS16	small subunit ribosomal protein S16e	http://www.genome.jp/dbget-bin/www_bget?ko:K02960	Q95V31	627	3.9e-64	40S ribosomal protein S16 OS=Spodoptera frugiperda OX=7108 GN=RpS16 PE=2 SV=1	PF00380	Ribosomal protein S9/S16	GO:0042254//GO:0006412	ribosome biogenesis//translation	GO:0003735	structural constituent of ribosome	GO:0005840	ribosome	KOG1753	40S ribosomal protein S16	UP	10.197	1.92e-08	blast,frame:3 start:192 end:641
Cluster-13861.0	60	93	226.86	0	0	0	0.58	0.9	2.2	0	0	0	3784	694449460	XP_009350379.1	195	6.7e-12	PREDICTED: LOW QUALITY PROTEIN: uncharacterized protein LOC103941904, partial [Pyrus x bretschneideri]	--	--	--	--	--	--	--	--	--	--	--	--	--	PF05856	ARP2/3 complex 20 kDa subunit (ARPC4)	GO:0034314//GO:0030041	Arp2/3 complex-mediated actin nucleation//actin filament polymerization	--	--	GO:0005885//GO:0015629	Arp2/3 protein complex//actin cytoskeleton	--	--	UP	9.36	1.97e-08	blast,frame:1 start:586 end:3120
Cluster-41647.21056	442.27	592.9	420.2	4854.51	6220.67	1820.72	15.82	21.02	14.98	168.02	223.43	65.14	1210	1273177970	PIA59680.1	1023	2.1e-108	hypothetical protein AQUCO_00400520v1 [Aquilegia coerulea]	U64893.1	U64893	279	1.12e-141	Pinus taeda expansin mRNA, partial cds	-	-	-	http://www.genome.jp/dbget-bin/www_bget?ko:-	O22874	956	4.7e-102	Expansin-A8 OS=Arabidopsis thaliana OX=3702 GN=EXPA8 PE=2 SV=1	PF05111	Ameloblastin precursor (Amelin)	GO:0042475//GO:0042476	odontogenesis of dentin-containing tooth//odontogenesis	GO:0030345	structural constituent of tooth enamel	--	--	--	--	DOWN	-3.187	1.97e-08	blast,frame:-1 start:1111 end:341
Cluster-41647.5091	37	387	609	0	0	0	0.49	5.17	8.15	0	0	0	2817	612395907	XP_007513473.1	207	2e-13	PREDICTED: similar to Zinc finger protein 271 (Zinc finger protein 7) (HZF7) (Zinc finger protein ZNFphex133) (Epstein-Barr virus-induced zinc finger protein) (ZNF-EB) (CT-ZFP48) (Zinc finger protein [Bathycoccus prasinos]	--	--	--	--	--	-	-	-	http://www.genome.jp/dbget-bin/www_bget?ko:-	Q99MD8	246	2.3e-19	Myoneurin OS=Mus musculus OX=10090 GN=Mynn PE=2 SV=2	PF00096//PF09026//PF06524//PF02600	Zinc finger, C2H2 type//Centromere protein B dimerisation domain//NOA36 protein//Disulfide bond formation protein DsbB	GO:0006118//GO:0006457	obsolete electron transport//protein folding	GO:0015035//GO:0003676//GO:0008270//GO:0003682//GO:0003677	protein disulfide oxidoreductase activity//nucleic acid binding//zinc ion binding//chromatin binding//DNA binding	GO:0000775//GO:0016021//GO:0000785//GO:0005634	chromosome, centromeric region//integral component of membrane//chromatin//nucleus	--	--	UP	10.799	1.97e-08	blast,frame:3 start:615 end:2609
Cluster-41647.11201	78	492	730	0	2	0	3.13	19.49	29.11	0	0.08	0	1108	545708593	XP_005706608.1	979	2.4e-103	40S ribosomal protein S4e [Galdieria sulphuraria]	BT110373.1	BT110373	426	0	Picea glauca clone GQ03220_M14 mRNA sequence	K02987	RP-S4e, RPS4	small subunit ribosomal protein S4e	http://www.genome.jp/dbget-bin/www_bget?ko:K02987	Q4PMB3	1139	2.6e-123	40S ribosomal protein S4 OS=Ixodes scapularis OX=6945 GN=RpS4 PE=2 SV=1	PF01479	S4 domain	--	--	GO:0003723	RNA binding	--	--	KOG0378	40S ribosomal protein S4	UP	9.274	1.98e-08	blast,frame:-1 start:817 end:35
Cluster-41647.33654	82	589	923	1	5	0	0.37	2.68	4.19	0	0.02	0	7822	326508656	BAJ95850.1	1339	3.1e-144	predicted protein [Hordeum vulgare subsp. vulgare]	XM_029124758.1	XM_029124758	112	5.08e-48	PREDICTED: Esox lucius calcium/calmodulin-dependent protein kinase type II subunit beta (LOC105007863), transcript variant X36, mRNA	K00710	GALNT	polypeptide N-acetylgalactosaminyltransferase	http://www.genome.jp/dbget-bin/www_bget?ko:K00710	Q6WV17	1775	3.2e-196	Polypeptide N-acetylgalactosaminyltransferase 5 OS=Drosophila melanogaster OX=7227 GN=Pgant5 PE=1 SV=2	PF00069//PF08332//PF07714	Protein kinase domain//Calcium/calmodulin dependent protein kinase II association domain//Protein tyrosine and serine/threonine kinase	GO:0006468//GO:0016310//GO:0009069	protein phosphorylation//phosphorylation//serine family amino acid metabolic process	GO:0005516//GO:0004672//GO:0004683//GO:0005524	calmodulin binding//protein kinase activity//calmodulin-dependent protein kinase activity//ATP binding	--	--	KOG3736	Polypeptide N-acetylgalactosaminyltransferase	UP	8.0029	1.99e-08	blast,frame:3 start:534 end:2045|blast,frame:-2 start:6516 end:3901
Cluster-41647.11184	84	636	1070	0	3	0	0.71	5.43	9.14	0	0.03	0	4272	--	--	--	--	--	--	--	--	--	--	--	--	--	--	Q5R880	138	1.2e-06	Secretory phospholipase A2 receptor OS=Pongo abelii OX=9601 GN=PLA2R1 PE=2 SV=2	--	--	--	--	--	--	--	--	--	--	UP	9.1498	1.99e-08	blast,frame:-2 start:3395 end:2412
Cluster-41647.34683	78	413	543	6	2	0	0.68	3.66	4.81	0.05	0.02	0	4125	835993842	XP_012702501.1	166	1.7e-08	chromatin remodeling protein EBS [Setaria italica]	--	--	--	--	--	-	-	-	http://www.genome.jp/dbget-bin/www_bget?ko:-	Q3LHL9	254	4e-20	Protein winged eye OS=Drosophila melanogaster OX=7227 GN=wge PE=1 SV=1	PF01426//PF00515//PF13181	BAH domain//Tetratricopeptide repeat//Tetratricopeptide repeat	--	--	GO:0003682//GO:0005515	chromatin binding//protein binding	GO:0000785	chromatin	KOG0548	Molecular co-chaperone STI1	UP	7.0425	2e-08	blast,frame:2 start:1067 end:3679
Cluster-41647.35037	40	286	381	0	0	0	2.44	16.96	22.85	0	0	0	819	1492262497	RLN28376.1	459	3.5e-43	nascent polypeptide associated complex alpha chain [Panicum miliaceum]	XM_024293299.1	XM_024293299	84	1.88e-33	PREDICTED: Oryzias melastigma nascent polypeptide-associated complex alpha subunit (naca), transcript variant X5, mRNA	K03626	EGD2, NACA	nascent polypeptide-associated complex subunit alpha	http://www.genome.jp/dbget-bin/www_bget?ko:K03626	Q8AWF2	514	5.6e-51	Nascent polypeptide-associated complex subunit alpha OS=Oreochromis niloticus OX=8128 GN=naca PE=2 SV=1	--	--	--	--	--	--	--	--	KOG2239	Transcription factor containing NAC and TS-N domains	UP	10.25	2e-08	blast,frame:-3 start:619 end:62
Cluster-41647.15886	741	1428	892	118	37	22	16.12	31.13	19.5	2.51	0.82	0.48	1819	769806469	XP_011625108.1	1287	7.7e-139	probable proline transporter 2 [Amborella trichopoda]	BT119357.1	BT119357	286	2.19e-145	Picea glauca clone GQ04104_K05 mRNA sequence	-	-	-	http://www.genome.jp/dbget-bin/www_bget?ko:-	Q69LA1	990	8e-106	Probable proline transporter 2 OS=Oryza sativa subsp. japonica OX=39947 GN=LOC_Os07g01090 PE=2 SV=1	--	--	--	--	--	--	--	--	--	--	UP	4.1326	2.02e-08	blast,frame:3 start:258 end:1691
Cluster-41647.10264	40	281	362	0	0	0	0.97	6.8	8.79	0	0	0	1662	--	--	--	--	--	--	--	--	--	--	--	--	--	--	--	--	--	--	--	--	--	--	--	--	--	--	--	--	UP	10.199	2.02e-08	estscan,start:164 end:568
Cluster-41647.21775	413	306.98	1247.19	21	16	2	141.78	87.09	374.98	5.86	4.67	0.59	356	--	--	--	--	--	--	--	--	--	--	--	--	--	--	--	--	--	--	--	--	--	--	--	--	--	--	--	--	UP	5.6798	2.02e-08	--
Cluster-41647.33961	379.05	268.5	601.63	44	37.38	12	9.32	6.6	14.84	1.06	0.93	0.3	1640	--	--	--	--	--	--	--	--	--	--	--	--	--	--	--	--	--	--	--	--	--	--	--	--	--	--	--	--	UP	3.7358	2.02e-08	estscan,start:1640 end:1283; minus strand
Cluster-41647.5364	54	467.05	501	1	3	0	0.4	3.5	3.75	0.01	0.02	0	4836	1377606958	GBG25566.1	508	4.4e-48	Protein phosphatase 1B [Hondaea fermentalgiana]	--	--	--	--	--	K17499	PPM1G, PP2CG	protein phosphatase 1G	http://www.genome.jp/dbget-bin/www_bget?ko:K17499	Q13002	1517	1.7e-166	Glutamate receptor ionotropic, kainate 2 OS=Homo sapiens OX=9606 GN=GRIK2 PE=1 SV=1	PF00060//PF04434//PF05649//PF00481//PF07830//PF10613	Ligand-gated ion channel//SWIM zinc finger//Peptidase family M13//Protein phosphatase 2C//Protein serine/threonine phosphatase 2C, C-terminal domain//Ligated ion channel L-glutamate- and glycine-binding site	GO:0006470//GO:0006508//GO:0007268//GO:0006811//GO:0007165	protein dephosphorylation//proteolysis//chemical synaptic transmission//ion transport//signal transduction	GO:0004721//GO:0000287//GO:0008270//GO:0030145//GO:0004970//GO:0003824//GO:0015276	phosphoprotein phosphatase activity//magnesium ion binding//zinc ion binding//manganese ion binding//ionotropic glutamate receptor activity//catalytic activity//ligand-gated ion channel activity	GO:0016020	membrane	--	--	UP	7.9469	2.04e-08	blast,frame:-1 start:4392 end:2902
Cluster-41647.4632	53	826.9	586.35	1	0	0	0.24	3.81	2.7	0	0	0	7724	1344012506	XP_023888854.1	1815	1.9e-199	glycogen [starch] synthase-like [Quercus suber]	XM_012005764.1	XM_012005764	107	3.02e-45	PREDICTED: Vollenhovia emeryi glycogen [starch] synthase (LOC105558200), transcript variant X2, mRNA	-	-	-	http://www.genome.jp/dbget-bin/www_bget?ko:-	P04412	2864	0	Epidermal growth factor receptor OS=Drosophila melanogaster OX=7227 GN=Egfr PE=1 SV=3	PF07714//PF05693//PF00069//PF00757	Protein tyrosine and serine/threonine kinase//Glycogen synthase//Protein kinase domain//Furin-like cysteine rich region	GO:0005982//GO:0007169//GO:0005978//GO:0006468//GO:0005985	starch metabolic process//transmembrane receptor protein tyrosine kinase signaling pathway//glycogen biosynthetic process//protein phosphorylation//sucrose metabolic process	GO:0004714//GO:0004373//GO:0005524//GO:0004672	transmembrane receptor protein tyrosine kinase activity//glycogen (starch) synthase activity//ATP binding//protein kinase activity	GO:0016020	membrane	KOG3742	Glycogen synthase	UP	10.331	2.05e-08	blast,frame:-1 start:7397 end:5316|blast,frame:2 start:674 end:5128
Cluster-41647.11215	519	332	802	84	67	55	18.54	11.76	28.57	2.9	2.4	1.97	1211	548834768	ERM96830.1	268	7.4e-21	hypothetical protein AMTR_s00128p00093480 [Amborella trichopoda]	--	--	--	--	--	-	-	-	http://www.genome.jp/dbget-bin/www_bget?ko:-	--	--	--	--	--	--	--	--	--	--	--	--	--	--	UP	2.9532	2.06e-08	blast,frame:3 start:3 end:902
Cluster-41647.32311	56	558	624	0	1	0	0.31	3.12	3.49	0	0.01	0	6399	1173938313	OQR88637.1	344	6e-29	nuclear transcription factor Y subunit [Thraustotheca clavata]	--	--	--	--	--	K08066	NFYC	nuclear transcription factor Y, gamma	http://www.genome.jp/dbget-bin/www_bget?ko:K08066	Q62725	354	1.6e-31	Nuclear transcription factor Y subunit gamma OS=Rattus norvegicus OX=10116 GN=Nfyc PE=2 SV=1	PF09415//PF01593//PF05699//PF04177//PF00125//PF04904	CENP-S associating Centromere protein X//Flavin containing amine oxidoreductase//hAT family C-terminal dimerisation region//TAP42-like family//Core histone H2A/H2B/H3/H4//NAB conserved region 1 (NCD1)	GO:0009966//GO:0055114//GO:0006355//GO:0051382//GO:0006281	regulation of signal transduction//oxidation-reduction process//regulation of transcription, DNA-templated//kinetochore assembly//DNA repair	GO:0016491//GO:0046983//GO:0003712//GO:0003677	oxidoreductase activity//protein dimerization activity//transcription coregulator activity//DNA binding	GO:0005667//GO:0000786//GO:0005634	transcription regulator complex//nucleosome//nucleus	KOG1657	CCAAT-binding factor, subunit C (HAP5)	UP	10.094	2.08e-08	blast,frame:2 start:149 end:1420
Cluster-41647.3844	316	230	253.1	18	13	1	9.4	6.82	7.53	0.52	0.39	0.03	1401	936626549	ALH22543.1	536	7.1e-52	expansin B1 [Pinus radiata]	--	--	--	--	--	K20628	exlX	expansin	http://www.genome.jp/dbget-bin/www_bget?ko:K20628	Q0DZ85	400	1.6e-37	Expansin-B16 OS=Oryza sativa subsp. japonica OX=39947 GN=EXPB16 PE=3 SV=1	--	--	--	--	--	--	--	--	--	--	UP	4.6497	2.08e-08	blast,frame:-2 start:518 end:288|blast,frame:-3 start:934 end:506
Cluster-41647.6662	35	441	501	0	0	0	0.24	3.09	3.51	0	0	0	5150	1293607725	PKA67000.1	1805	1.9e-198	CHD3-type chromatin-remodeling factor PICKLE [Apostasia shenzhenica]	LM525801.1	LM525801	60	2.69e-19	Strongyloides papillosus genome assembly S_papillosus_LIN ,scaffold SPAL_contig0000186	K11367	CHD1	chromodomain-helicase-DNA-binding protein 1	http://www.genome.jp/dbget-bin/www_bget?ko:K11367	B6ZLK2	2799	0	Chromodomain-helicase-DNA-binding protein 1 OS=Gallus gallus OX=9031 GN=CHD1 PE=1 SV=1	PF04851//PF01708//PF00176	Type III restriction enzyme, res subunit//Geminivirus putative movement protein//SNF2 family N-terminal domain	GO:0046740	transport of virus in host, cell to cell	GO:0016787//GO:0005524//GO:0003677	hydrolase activity//ATP binding//DNA binding	GO:0016021	integral component of membrane	KOG0384	Chromodomain-helicase DNA-binding protein	UP	10.714	2.08e-08	blast,frame:2 start:131 end:5089
Cluster-41647.17467	523.62	751.29	1644.48	91.67	39.12	61.23	32.09	44.8	99.13	5.34	2.37	3.7	816	306017083	ADM77595.1	511	3.3e-49	UDP-glucosyltransferase-like protein, partial [Picea sitchensis]	--	--	--	--	--	-	-	-	http://www.genome.jp/dbget-bin/www_bget?ko:-	Q9SJL0	390	1.3e-36	UDP-glycosyltransferase 86A1 OS=Arabidopsis thaliana OX=3702 GN=UGT86A1 PE=2 SV=1	PF00201//PF04101	UDP-glucoronosyl and UDP-glucosyl transferase//Glycosyltransferase family 28 C-terminal domain	--	--	GO:0016758	transferase activity, transferring hexosyl groups	--	--	--	--	UP	3.8796	2.08e-08	blast,frame:2 start:2 end:502
Cluster-18618.0	40	270	329	0	0	0	0.33	2.24	2.73	0	0	0	4395	1376844006	PTQ34640.1	1223	4.9e-131	hypothetical protein MARPO_0078s0045 [Marchantia polymorpha]	XM_027989029.1	XM_027989029	100	1.33e-41	PREDICTED: Aphis gossypii cytoplasmic FMR1-interacting protein (LOC114125402), transcript variant X3, mRNA	K05749	CYFIP	cytoplasmic FMR1 interacting protein	http://www.genome.jp/dbget-bin/www_bget?ko:K05749	Q9VF87	3816	0	Cytoplasmic FMR1-interacting protein OS=Drosophila melanogaster OX=7227 GN=Sra-1 PE=1 SV=1	--	--	--	--	--	--	--	--	KOG3534	p53 inducible protein PIR121	UP	10.102	2.08e-08	blast,frame:2 start:275 end:4345
Cluster-41647.20252	225.99	277.55	246.26	91.31	79.94	62.81	22.09	25.74	23.26	8.28	7.54	5.93	609	1430498211	SPT16525.1	257	7e-20	unnamed protein product [Triticum aestivum]	--	--	--	--	--	-	-	-	http://www.genome.jp/dbget-bin/www_bget?ko:-	Q9LZV7	230	3.6e-18	Leucine-rich repeat receptor-like protein kinase PXC2 OS=Arabidopsis thaliana OX=3702 GN=PXC2 PE=1 SV=1	PF13516//PF11857//PF00560//PF00069//PF13855//PF07714	Leucine Rich repeat//Domain of unknown function (DUF3377)//Leucine Rich Repeat//Protein kinase domain//Leucine rich repeat//Protein tyrosine and serine/threonine kinase	GO:0006468	protein phosphorylation	GO:0005524//GO:0004222//GO:0005515//GO:0004672	ATP binding//metalloendopeptidase activity//protein binding//protein kinase activity	--	--	--	--	UP	1.6147	2.09e-08	estscan,start:1 end:296
Cluster-41647.7995	38	338.94	358.47	0	0	0	0.73	6.54	6.94	0	0	0	2023	902864690	KNB46636.1	326	2.3e-27	hypothetical protein JH06_0233 [Blastocystis sp. subtype 4]	--	--	--	--	--	-	-	-	http://www.genome.jp/dbget-bin/www_bget?ko:-	Q99323	1341	1.8e-146	Myosin heavy chain, non-muscle OS=Drosophila melanogaster OX=7227 GN=zip PE=1 SV=2	PF01576	Myosin tail	--	--	GO:0003774	motor activity	GO:0016459	myosin complex	KOG0161	Myosin class II heavy chain	UP	10.302	2.09e-08	blast,frame:1 start:1 end:1971
Cluster-20533.1	59	474	586	0	1	0	0.25	2.06	2.55	0	0	0	8151	922866129	KOO33046.1	196	1.1e-11	coiled-coil domain-containing protein 65-like protein [Chrysochromulina tobinii]	--	--	--	--	--	--	--	--	--	Q9NFU0	612	2.4e-61	Synaptic functional regulator FMR1 OS=Drosophila melanogaster OX=7227 GN=Fmr1 PE=1 SV=1	PF00013//PF06206	KH domain//CpeT/CpcT family (DUF1001)	GO:0017009	protein-phycocyanobilin linkage	GO:0016829//GO:0003723	lyase activity//RNA binding	--	--	--	--	UP	9.9493	2.09e-08	blast,frame:-3 start:7402 end:4154
Cluster-41647.5138	111	1094	1621	9	2	0	3.82	37.33	55.61	0.3	0.07	0	1248	357140906	XP_003572000.1	774	1.6e-79	40S ribosomal protein S3a [Brachypodium distachyon]	--	--	--	--	--	K02984	RP-S3Ae, RPS3A	small subunit ribosomal protein S3Ae	http://www.genome.jp/dbget-bin/www_bget?ko:K02984	P49242	896	4.4e-95	40S ribosomal protein S3a OS=Rattus norvegicus OX=10116 GN=Rps3a PE=1 SV=2	PF01015	Ribosomal S3Ae family	GO:0042254//GO:0006412	ribosome biogenesis//translation	GO:0003735	structural constituent of ribosome	GO:0005840	ribosome	KOG1628	40S ribosomal protein S3A	UP	8.0699	2.09e-08	blast,frame:3 start:225 end:1022
Cluster-41647.32531	50	471	757	3	1	0	0.38	3.61	5.8	0.02	0.01	0	4731	1559669060	RWW91137.1	254	1.2e-18	hypothetical protein BHE74_00000286 [Ensete ventricosum]	XM_015928406.2	XM_015928406	41	9.02e-09	PREDICTED: Tetranychus urticae multifunctional protein ADE2 (LOC107361566), mRNA	K01923	purC	phosphoribosylaminoimidazole-succinocarboxamide synthase	http://www.genome.jp/dbget-bin/www_bget?ko:K01923	Q9I7S8	970	4.3e-103	Multifunctional protein ADE2 OS=Drosophila melanogaster OX=7227 GN=ade5 PE=2 SV=2	PF13202//PF00731//PF00404	EF hand//AIR carboxylase//Dockerin type I domain	GO:0000272//GO:0005975//GO:0006189	polysaccharide catabolic process//carbohydrate metabolic process//'de novo' IMP biosynthetic process	GO:0005509//GO:0004553	calcium ion binding//hydrolase activity, hydrolyzing O-glycosyl compounds	--	--	KOG2835	Phosphoribosylamidoimidazole-succinocarboxamide synthase	UP	8.334	2.09e-08	blast,frame:1 start:880 end:2229
Cluster-41647.15883	72	1225	1031	0	3	0	9.09	144.05	124.11	0	0.36	0	530	--	--	--	--	--	--	--	--	--	--	--	--	--	--	--	--	--	--	--	--	--	--	--	--	--	--	--	--	UP	9.5187	2.09e-08	estscan,start:530 end:242; minus strand
Cluster-41647.3792	88	516	633	4	0	0	0.63	3.75	4.6	0.03	0	0	4974	--	--	--	--	--	--	--	--	--	--	--	--	--	--	Q0VH32	209	8e-15	Max-binding protein MNT OS=Xenopus laevis OX=8355 GN=mnt PE=2 SV=1	PF00010	Helix-loop-helix DNA-binding domain	--	--	GO:0046983	protein dimerization activity	--	--	--	--	UP	8.3108	2.09e-08	blast,frame:-3 start:2581 end:1454
Cluster-41647.18214	58	300	549	2	3	0	0.62	3.23	5.92	0.02	0.03	0	3436	694452069	XP_009351063.1	1155	2.9e-123	PREDICTED: acetyl-CoA acetyltransferase, mitochondrial-like [Pyrus x bretschneideri]	--	--	--	--	--	K00626	E2.3.1.9, atoB	acetyl-CoA C-acetyltransferase	http://www.genome.jp/dbget-bin/www_bget?ko:K00626	Q29RZ0	949	8.6e-101	Acetyl-CoA acetyltransferase, mitochondrial OS=Bos taurus OX=9913 GN=ACAT1 PE=2 SV=1	PF00108//PF02803//PF08545	Thiolase, N-terminal domain//Thiolase, C-terminal domain//3-Oxoacyl-[acyl-carrier-protein (ACP)] synthase III	GO:0042967//GO:0006633	obsolete acyl-carrier-protein biosynthetic process//fatty acid biosynthetic process	GO:0004315//GO:0016747	3-oxoacyl-[acyl-carrier-protein] synthase activity//transferase activity, transferring acyl groups other than amino-acyl groups	GO:0005835	fatty acid synthase complex	KOG1390	Acetyl-CoA acetyltransferase	UP	7.4788	2.1e-08	blast,frame:2 start:1685 end:3007
Cluster-41647.7241	61	431	806.99	0	1	0	0.64	4.57	8.56	0	0.01	0	3488	1492331937	RLN82882.1	257	4e-19	hypothetical protein BBO99_00002583 [Phytophthora kernoviae]	--	--	--	--	--	-	-	-	http://www.genome.jp/dbget-bin/www_bget?ko:-	A1L3X0	422	1.1e-39	Elongation of very long chain fatty acids protein 7 OS=Homo sapiens OX=9606 GN=ELOVL7 PE=1 SV=1	PF01151//PF01542//PF15234	GNS1/SUR4 family//Hepatitis C virus core protein//Linker for activation of T-cells	GO:0007165	signal transduction	GO:0005198	structural molecule activity	GO:0016021//GO:0016020	integral component of membrane//membrane	--	--	UP	10.17	2.1e-08	blast,frame:-1 start:1049 end:63
Cluster-32083.1	37	373	382	0	0	0	0.35	3.56	3.65	0	0	0	3846	585111614	EWM29095.1	567	5e-55	udp-n-acetylglucosamine transporter [Nannochloropsis gaditana]	--	--	--	--	--	K15272	SLC35A1_2_3	solute carrier family 35 (UDP-sugar transporter), member A1/2/3	http://www.genome.jp/dbget-bin/www_bget?ko:K15272	Q28041	682	8.8e-70	Activin receptor type-1 OS=Bos taurus OX=9913 GN=ACVR1 PE=2 SV=1	PF00892//PF04142//PF01064//PF00069//PF07714//PF08449//PF00829	EamA-like transporter family//Nucleotide-sugar transporter//Activin types I and II receptor domain//Protein kinase domain//Protein tyrosine and serine/threonine kinase//UAA transporter family//Ribosomal prokaryotic L21 protein	GO:0090481//GO:0006468//GO:0055085//GO:0009069//GO:0016310//GO:0007178	pyrimidine nucleotide-sugar transmembrane transport//protein phosphorylation//transmembrane transport//serine family amino acid metabolic process//phosphorylation//transmembrane receptor protein serine/threonine kinase signaling pathway	GO:0005524//GO:0004672//GO:0004675//GO:0015165	ATP binding//protein kinase activity//transmembrane receptor protein serine/threonine kinase activity//pyrimidine nucleotide-sugar transmembrane transporter activity	GO:0016021//GO:0005840//GO:0000139//GO:0016020	integral component of membrane//ribosome//Golgi membrane//membrane	--	--	UP	10.41	2.1e-08	blast,frame:-3 start:3115 end:2021
[truncated: 10,208 more rows]
